# Supplementary material for: Gut microbiota in inflammatory bowel disease: a combined culturomics and metagenomics perspective
Source: Research Square preprint supplement (doi:10.21203/rs.3.rs-3343885/v1), 2023-09-18
Supplement: Supplementary file 1 [file 15dc3ae3e44a101bab17066c.xlsx]

## Sheet: UC-isolated list
Cultured gut microbiota in ulcerative colitis
Phylum	Class	Order	Family	Genus	Species
Actinobacteriota	Actinobacteria	Actinomycetales	Actinomycetaceae	Actinomyces	Actinomyces europaeus
Bacteroidota	Bacteroidia	Bacteroidales	Rikenellaceae	Alistipes	Alistipes onderdonkii
Bacteroidota	Bacteroidia	Bacteroidales	Rikenellaceae	Alistipes	Alistipes putredinis
Bacteroidota	Bacteroidia	Bacteroidales	Rikenellaceae	Alistipes	Alistipes shahii
Firmicutes	Clostridia	Eubacteriales	Peptoniphilaceae	Anaerococcus	Anaerococcus hydrogenalis
Firmicutes	Clostridia	Eubacteriales	Peptoniphilaceae	Anaerococcus	Anaerococcus vaginalis
Firmicutes	Tissierellia	Tissierellales	Tissierellaceae	Anaerosalibacter	Anaerosalibacter massiliensis
Firmicutes	Clostridia	Eubacteriales	Lachnospiraceae	Anaerotignum	Anaerotignum lactatifermentans
Firmicutes	Clostridia	Eubacteriales	Clostridiaceae	Asaccharospora	Asaccharospora irregularis
Actinobacteriota	Coriobacteriia	Coriobacteriales	Atopobiaceae	Atopobium	Atopobium parvulum
Firmicutes	Bacilli	Caryophanales	Bacillaceae	Bacillus	Bacillus aerius
Firmicutes	Bacilli	Caryophanales	Bacillaceae	Bacillus	Bacillus cereus
Firmicutes	Bacilli	Caryophanales	Bacillaceae	Bacillus	Bacillus clausii
Firmicutes	Bacilli	Caryophanales	Bacillaceae	Bacillus	Bacillus haynesii
Firmicutes	Bacilli	Caryophanales	Bacillaceae	Bacillus	Bacillus kochii
Firmicutes	Bacilli	Caryophanales	Bacillaceae	Bacillus	Bacillus licheniformis
Firmicutes	Bacilli	Caryophanales	Bacillaceae	Bacillus	Bacillus mojavensis
Firmicutes	Bacilli	Caryophanales	Bacillaceae	Bacillus	Bacillus pumilus
Firmicutes	Bacilli	Caryophanales	Bacillaceae	Bacillus	Bacillus safensis
Firmicutes	Bacilli	Caryophanales	Bacillaceae	Bacillus	Bacillus subtilis
Firmicutes	Bacilli	Caryophanales	Bacillaceae	Bacillus	Bacillus velezensis
Bacteroidota	Bacteroidia	Bacteroidales	Bacteroidaceae	Bacteroides	Bacteroides caccae
Bacteroidota	Bacteroidia	Bacteroidales	Bacteroidaceae	Bacteroides	Bacteroides coprocola
Bacteroidota	Bacteroidia	Bacteroidales	Bacteroidaceae	Bacteroides	Bacteroides eggerthii
Bacteroidota	Bacteroidia	Bacteroidales	Bacteroidaceae	Bacteroides	Bacteroides faecis
Bacteroidota	Bacteroidia	Bacteroidales	Bacteroidaceae	Bacteroides	Bacteroides fragilis
Bacteroidota	Bacteroidia	Bacteroidales	Bacteroidaceae	Bacteroides	Bacteroides humanifaecis
Bacteroidota	Bacteroidia	Bacteroidales	Bacteroidaceae	Bacteroides	Bacteroides intestinalis
Bacteroidota	Bacteroidia	Bacteroidales	Bacteroidaceae	Bacteroides	Bacteroides nordii
Bacteroidota	Bacteroidia	Bacteroidales	Bacteroidaceae	Bacteroides	Bacteroides ovatus
Bacteroidota	Bacteroidia	Bacteroidales	Bacteroidaceae	Bacteroides	Bacteroides stercoris
Bacteroidota	Bacteroidia	Bacteroidales	Bacteroidaceae	Bacteroides	Bacteroides thetaiotaomicron
Bacteroidota	Bacteroidia	Bacteroidales	Bacteroidaceae	Bacteroides	Bacteroides uniformis
Bacteroidota	Bacteroidia	Bacteroidales	Bacteroidaceae	Bacteroides	Bacteroides vulgatus
Actinobacteriota	Actinobacteria	Bifidobacteriales	Bifidobacteriaceae	Bifidobacterium	Bifidobacterium adolescentis
Actinobacteriota	Actinobacteria	Bifidobacteriales	Bifidobacteriaceae	Bifidobacterium	Bifidobacterium bifidum
Actinobacteriota	Actinobacteria	Bifidobacteriales	Bifidobacteriaceae	Bifidobacterium	Bifidobacterium breve
Actinobacteriota	Actinobacteria	Bifidobacteriales	Bifidobacteriaceae	Bifidobacterium	Bifidobacterium catenulatum
Actinobacteriota	Actinobacteria	Bifidobacteriales	Bifidobacteriaceae	Bifidobacterium	Bifidobacterium dentium
Actinobacteriota	Actinobacteria	Bifidobacteriales	Bifidobacteriaceae	Bifidobacterium	Bifidobacterium faecale
Actinobacteriota	Actinobacteria	Bifidobacteriales	Bifidobacteriaceae	Bifidobacterium	Bifidobacterium longum
Actinobacteriota	Actinobacteria	Bifidobacteriales	Bifidobacteriaceae	Bifidobacterium	Bifidobacterium longum subsp. suillum
Actinobacteriota	Actinobacteria	Bifidobacteriales	Bifidobacteriaceae	Bifidobacterium	Bifidobacterium pseudocatenulatum
Firmicutes	Clostridia	Eubacteriales	Lachnospiraceae	Blautia	Blautia caecimuris
Firmicutes	Clostridia	Eubacteriales	Lachnospiraceae	Blautia	Blautia coccoides
Firmicutes	Clostridia	Eubacteriales	Lachnospiraceae	Blautia	Blautia faecis
Firmicutes	Clostridia	Eubacteriales	Lachnospiraceae	Blautia	Blautia hansenii
Firmicutes	Clostridia	Eubacteriales	Lachnospiraceae	Blautia	Blautia hominis
Firmicutes	Clostridia	Eubacteriales	Lachnospiraceae	Blautia	Blautia obeum
Firmicutes	Clostridia	Eubacteriales	Lachnospiraceae	Blautia	Blautia sp.
Proteobacteria	Epsilonproteobacteria	Campylobacterales	Campylobacteraceae	Campylobacter	Campylobacter hominis
Proteobacteria	Epsilonproteobacteria	Campylobacterales	Campylobacteraceae	Campylobacter	Campylobacter ureolyticus
Firmicutes	Clostridia	Eubacteriales	Eubacteriales Family XIII. Incertae Sedis	Casaltella	Casaltella massiliensis
Firmicutes	Clostridia	Eubacteriales	Christensenellaceae	Christensenella	Christensenella minuta
Proteobacteria	Gammaproteobacteria	Enterobacterales	Enterobacteriaceae	Citrobacter	Citrobacter amalonaticus
Proteobacteria	Gammaproteobacteria	Enterobacterales	Enterobacteriaceae	Citrobacter	Citrobacter braakii
Proteobacteria	Gammaproteobacteria	Enterobacterales	Enterobacteriaceae	Citrobacter	Citrobacter freundii
Proteobacteria	Gammaproteobacteria	Enterobacterales	Enterobacteriaceae	Citrobacter	Citrobacter koseri
Firmicutes	Clostridia	Eubacteriales	Clostridiaceae	Clostridium	Clostridium aldenense
Firmicutes	Clostridia	Eubacteriales	Clostridiaceae	Clostridium	Clostridium baratii
Firmicutes	Clostridia	Eubacteriales	Clostridiaceae	Clostridium	Clostridium bolteae
Firmicutes	Clostridia	Eubacteriales	Clostridiaceae	Clostridium	Clostridium butyricum
Firmicutes	Clostridia	Eubacteriales	Clostridiaceae	Clostridium	Clostridium cadaveris
Firmicutes	Clostridia	Eubacteriales	Clostridiaceae	Clostridium	Clostridium citroniae
Firmicutes	Clostridia	Eubacteriales	Clostridiaceae	Clostridium	Clostridium clostridioforme
Firmicutes	Clostridia	Eubacteriales	Clostridiaceae	Clostridium	Clostridium culturomicium
Firmicutes	Clostridia	Eubacteriales	Clostridiaceae	Clostridium	Clostridium difficile
Firmicutes	Clostridia	Eubacteriales	Clostridiaceae	Clostridium	Clostridium innocuum
Firmicutes	Clostridia	Eubacteriales	Clostridiaceae	Clostridium	Clostridium lavalense
Firmicutes	Clostridia	Eubacteriales	Clostridiaceae	Clostridium	Clostridium paraputrificum
Firmicutes	Clostridia	Eubacteriales	Clostridiaceae	Clostridium	Clostridium perfringens
Firmicutes	Clostridia	Eubacteriales	Clostridiaceae	Clostridium	Clostridium ramosum
Firmicutes	Clostridia	Eubacteriales	Clostridiaceae	Clostridium	Clostridium scindens
Firmicutes	Clostridia	Eubacteriales	Clostridiaceae	Clostridium	Clostridium sporogenes
Firmicutes	Clostridia	Eubacteriales	Clostridiaceae	Clostridium	Clostridium symbiosum
Firmicutes	Clostridia	Eubacteriales	Clostridiaceae	Clostridium	Clostridium tertium
Actinobacteriota	Coriobacteriia	Coriobacteriales	Coriobacteriaceae	Collinsella	Collinsella aerofaciens
Firmicutes	Clostridia	Eubacteriales	Lachnospiraceae	Coprococcus	Coprococcus comes
Actinobacteriota	Actinobacteria	Mycobacteriales	Corynebacteriaceae	Corynebacterium	Corynebacterium amycolatum
Actinobacteriota	Actinobacteria	Mycobacteriales	Corynebacteriaceae	Corynebacterium	Corynebacterium coyleae
Actinobacteriota	Actinobacteria	Mycobacteriales	Corynebacteriaceae	Corynebacterium	Corynebacterium glucuronolyticum
Actinobacteriota	Actinobacteria	Mycobacteriales	Corynebacteriaceae	Corynebacterium	Corynebacterium lipophile_group_F1
Actinobacteriota	Actinobacteria	Mycobacteriales	Corynebacteriaceae	Corynebacterium	Corynebacterium tuberculostearicum
Firmicutes	Clostridia	Eubacteriales	Lachnospiraceae	Dorea	Dorea sp.
Firmicutes	Clostridia	Eubacteriales	Oscillospiraceae	Drancourtella	Drancourtella massiliensis
Actinobacteriota	Coriobacteriia	Eggerthellales	Eggerthellaceae	Eggerthella	Eggerthella lenta
Firmicutes	Clostridia	Eubacteriales	Lachnospiraceae	Eisenbergiella	Eisenbergiella massiliensis
Proteobacteria	Gammaproteobacteria	Enterobacterales	Enterobacteriaceae	Enterobacter	Enterobacter asburiae
Proteobacteria	Gammaproteobacteria	Enterobacterales	Enterobacteriaceae	Enterobacter	Enterobacter cloacae
Proteobacteria	Gammaproteobacteria	Enterobacterales	Enterobacteriaceae	Enterobacter	Enterobacter tabaci
Firmicutes	Bacilli	Lactobacillales	Enterococcaceae	Enterococcus	Enterococcus asini
Firmicutes	Bacilli	Lactobacillales	Enterococcaceae	Enterococcus	Enterococcus avium
Firmicutes	Bacilli	Lactobacillales	Enterococcaceae	Enterococcus	Enterococcus casseliflavus
Firmicutes	Bacilli	Lactobacillales	Enterococcaceae	Enterococcus	Enterococcus dispar
Firmicutes	Bacilli	Lactobacillales	Enterococcaceae	Enterococcus	Enterococcus durans
Firmicutes	Bacilli	Lactobacillales	Enterococcaceae	Enterococcus	Enterococcus faecalis
Firmicutes	Bacilli	Lactobacillales	Enterococcaceae	Enterococcus	Enterococcus faecium
Firmicutes	Bacilli	Lactobacillales	Enterococcaceae	Enterococcus	Enterococcus gallinarum
Firmicutes	Bacilli	Lactobacillales	Enterococcaceae	Enterococcus	Enterococcus hirae
Firmicutes	Bacilli	Lactobacillales	Enterococcaceae	Enterococcus	Enterococcus mundtii
Firmicutes	Bacilli	Lactobacillales	Enterococcaceae	Enterococcus	Enterococcus raffinosus
Firmicutes	Bacilli	Lactobacillales	Enterococcaceae	Enterococcus	Enterococcus thailandicus
Proteobacteria	Gammaproteobacteria	Enterobacterales	Enterobacteriaceae	Escherichia	Escherichia coli
Firmicutes	Clostridia	Eubacteriales	Eubacteriaceae	Eubacterium	Eubacterium callanderi
Firmicutes	Clostridia	Eubacteriales	Eubacteriaceae	Eubacterium	Eubacterium limosum
Firmicutes	Clostridia	Eubacteriales	Eubacteriaceae	Eubacterium	Eubacterium rectale
Firmicutes	Clostridia	Eubacteriales	Eubacteriaceae	Eubacterium	Eubacterium sp[2]
Firmicutes	Clostridia	Eubacteriales	Eubacteriaceae	Eubacterium	Eubacterium tenue
Firmicutes	Bacilli	Lactobacillales	Aerococcaceae	Facklamia	Facklamia hominis
Firmicutes	Erysipelotrichia	Erysipelotrichales	Erysipelotrichaceae	Faecalicoccus	Faecalicoccus pleomorphus
Firmicutes	Tissierellia	Tissierellales	Peptoniphilaceae	Finegoldia	Finegoldia magna
Firmicutes	Clostridia	Eubacteriales	Oscillospiraceae	Flavonifractor	Flavonifractor plautii
Bacteroidota	Bacteroidia	Bacteroidales	Porphyromonadaceae	Gabonia	Gabonia massiliensis
Firmicutes	Bacilli	Caryophanales	Staphylococcaceae	Gemella	Gemella morbillorum
Firmicutes	Clostridia	Eubacteriales	Clostridiaceae	Hungatella	Hungatella effluvii
Firmicutes	Clostridia	Eubacteriales	Clostridiaceae	Hungatella	Hungatella hathewayi
Firmicutes	Clostridia	Eubacteriales	Oscillospiraceae	Intestinimonas	Intestinimonas butyriciproducens
Firmicutes	Clostridia	Eubacteriales	Eubacteriales incertae sedis	Kallipyga	Kallipyga massiliensis
Proteobacteria	Gammaproteobacteria	Enterobacterales	Enterobacteriaceae	Klebsiella	Klebsiella aerogenes
Proteobacteria	Gammaproteobacteria	Enterobacterales	Enterobacteriaceae	Klebsiella	Klebsiella oxytoca
Proteobacteria	Gammaproteobacteria	Enterobacterales	Enterobacteriaceae	Klebsiella	Klebsiella pneumoniae
Proteobacteria	Gammaproteobacteria	Enterobacterales	Enterobacteriaceae	Klebsiella	Klebsiella quasipneumoniae subsp. similipneumoniae
Proteobacteria	Gammaproteobacteria	Enterobacterales	Enterobacteriaceae	Klebsiella	Klebsiella variicola
Firmicutes	Clostridia	Eubacteriales	Lachnospiraceae	Lachnoclostridium	Lachnoclostridium pacaense
Firmicutes	Bacilli	Lactobacillales	Lactobacillaceae	Lacticaseibacillus	Lacticaseibacillus paracasei
Firmicutes	Bacilli	Lactobacillales	Lactobacillaceae	Lacticaseibacillus	Lacticaseibacillus rhamnosus
Firmicutes	Bacilli	Lactobacillales	Lactobacillaceae	Lactiplantibacillus	Lactiplantibacillus plantarum
Firmicutes	Bacilli	Lactobacillales	Streptococcaceae	Lactococcus	Lactococcus garvieae
Firmicutes	Bacilli	Lactobacillales	Streptococcaceae	Lactococcus	Lactococcus lactis
Firmicutes	Clostridia	Eubacteriales	Peptoniphilaceae	Lagierella	Lagierella sp.
Firmicutes	Bacilli	Lactobacillales	Lactobacillaceae	Latilactobacillus	Latilactobacillus sakei
Firmicutes	Bacilli	Lactobacillales	Leuconostocaceae	Leuconostoc	Leuconostoc lactis
Firmicutes	Bacilli	Lactobacillales	Lactobacillaceae	Levilactobacillus	Levilactobacillus brevis
Firmicutes	Clostridia	Eubacteriales	Eubacteriales incertae sedis	Levyella	Levyella massiliensis
Firmicutes	Bacilli	Lactobacillales	Lactobacillaceae	Ligilactobacillus	Ligilactobacillus salivarius
Firmicutes	Bacilli	Lactobacillales	Lactobacillaceae	Limosilactobacillus	Limosilactobacillus fermentum
Firmicutes	Bacilli	Lactobacillales	Lactobacillaceae	Limosilactobacillus	Limosilactobacillus mucosae
Firmicutes	Erysipelotrichia	Erysipelotrichales	Erysipelotrichaceae	Longicatena	Longicatena caecimuris
Firmicutes	Bacilli	Caryophanales	Caryophanaceae	Lysinibacillus	Lysinibacillus boronitolerans
Firmicutes	Bacilli	Caryophanales	Caryophanaceae	Lysinibacillus	Lysinibacillus fusiformis
Firmicutes	Bacilli	Caryophanales	Caryophanaceae	Lysinibacillus	Lysinibacillus sphaericus
Firmicutes	Bacilli	Caryophanales	Caryophanaceae	Lysinibacillus	Lysinibacillus xylanilyticus
Firmicutes	Erysipelotrichia	Erysipelotrichales	Erysipelotrichaceae	Massiliomicrobiota	Massiliomicrobiota timonensis
Firmicutes	Clostridia	Eubacteriales	Lachnospiraceae	Mediterraneibacter	Mediterraneibacter sp.
Proteobacteria	Gammaproteobacteria	Enterobacterales	Morganellaceae	Morganella	Morganella morganii
Firmicutes	Clostridia	Eubacteriales	Peptoniphilaceae	Murdochiella	Murdochiella asaccharolytica
Firmicutes	Bacilli	Caryophanales	Bacillaceae	Oceanobacillus	Oceanobacillus sp.
Bacteroidota	Bacteroidia	Bacteroidales	Odoribacteraceae	Odoribacter	Odoribacter splanchnicus
Firmicutes	Clostridia	Eubacteriales	Clostridiaceae	Paeniclostridium	Paeniclostridium sordellii
Proteobacteria	Gammaproteobacteria	Enterobacterales	Erwiniaceae	Pantoea	Pantoea agglomerans
Bacteroidota	Bacteroidia	Bacteroidales	Tannerellaceae	Parabacteroides	Parabacteroides distasonis
Bacteroidota	Bacteroidia	Bacteroidales	Tannerellaceae	Parabacteroides	Parabacteroides johnsonii
Bacteroidota	Bacteroidia	Bacteroidales	Tannerellaceae	Parabacteroides	Parabacteroides merdae
Firmicutes	Clostridia	Eubacteriales	Clostridiaceae	Paraclostridium	Paraclostridium benzoelyticum
Firmicutes	Clostridia	Eubacteriales	Clostridiaceae	Paraclostridium	Paraclostridium bifermentans
Proteobacteria	Betaproteobacteria	Burkholderiales	Sutterellaceae	Parasutterella	Parasutterella excrementihominis
Firmicutes	Bacilli	Lactobacillales	Lactobacillaceae	Pediococcus	Pediococcus acidilactici
Firmicutes	Bacilli	Lactobacillales	Lactobacillaceae	Pediococcus	Pediococcus pentosaceus
Firmicutes	Clostridia	Eubacteriales	Peptoniphilaceae	Peptoniphilus	Peptoniphilus coxii
Firmicutes	Clostridia	Eubacteriales	Peptoniphilaceae	Peptoniphilus	Peptoniphilus gorbachii
Firmicutes	Clostridia	Eubacteriales	Peptoniphilaceae	Peptoniphilus	Peptoniphilus grossensis
Firmicutes	Clostridia	Eubacteriales	Peptoniphilaceae	Peptoniphilus	Peptoniphilus harei
Firmicutes	Clostridia	Eubacteriales	Peptoniphilaceae	Peptoniphilus	Peptoniphilus indolicus
Firmicutes	Clostridia	Eubacteriales	Peptoniphilaceae	Peptoniphilus	Peptoniphilus lacrimalis
Firmicutes	Clostridia	Eubacteriales	Peptoniphilaceae	Peptoniphilus	Peptoniphilus lacydonensis
Firmicutes	Clostridia	Eubacteriales	Peptoniphilaceae	Peptoniphilus	Peptoniphilus pacaensis
Firmicutes	Clostridia	Eubacteriales	Peptoniphilaceae	Peptoniphilus	Peptoniphilus phoceensis
Firmicutes	Clostridia	Eubacteriales	Peptoniphilaceae	Peptoniphilus	Peptoniphilus rhinitidis
Firmicutes	Clostridia	Eubacteriales	Peptoniphilaceae	Peptoniphilus	Peptoniphilus sp.
Firmicutes	Clostridia	Eubacteriales	Peptoniphilaceae	Peptoniphilus	Peptoniphilus timonensis
Firmicutes	Clostridia	Eubacteriales	Peptoniphilaceae	Peptoniphilus	Peptoniphilus urinimassiliensis
Bacteroidota	Bacteroidia	Bacteroidales	Bacteroidaceae	Phocaeicola	Phocaeicola sp.
Bacteroidota	Bacteroidia	Bacteroidales	Porphyromonadaceae	Porphyromonas	Porphyromonas bennonis
Bacteroidota	Bacteroidia	Bacteroidales	Porphyromonadaceae	Porphyromonas	Porphyromonas somerae
Bacteroidota	Bacteroidia	Bacteroidales	Prevotellaceae	Prevotella	Prevotella bergensis
Bacteroidota	Bacteroidia	Bacteroidales	Prevotellaceae	Prevotella	Prevotella buccalis
Bacteroidota	Bacteroidia	Bacteroidales	Prevotellaceae	Prevotella	Prevotella denticola
Bacteroidota	Bacteroidia	Bacteroidales	Prevotellaceae	Prevotella	Prevotella timonensis
Proteobacteria	Gammaproteobacteria	Enterobacterales	Morganellaceae	Proteus	Proteus hauseri
Proteobacteria	Gammaproteobacteria	Enterobacterales	Morganellaceae	Proteus	Proteus mirabilis
Proteobacteria	Gammaproteobacteria	Enterobacterales	Morganellaceae	Proteus	Proteus penneri
Proteobacteria	Gammaproteobacteria	Enterobacterales	Morganellaceae	Proteus	Proteus vulgaris
Proteobacteria	Gammaproteobacteria	Enterobacterales	Morganellaceae	Providencia	Providencia stuartii
Firmicutes	Bacilli	Caryophanales	Bacillaceae	Pseudogracilibacillus	Pseudogracilibacillus sp.
Proteobacteria	Gammaproteobacteria	Pseudomonadales	Pseudomonadaceae	Pseudomonas	Pseudomonas citronellolis
Proteobacteria	Gammaproteobacteria	Pseudomonadales	Pseudomonadaceae	Pseudomonas	Pseudomonas monteilii
Firmicutes	Clostridia	Eubacteriales	Eubacteriaceae	Pseudoramibacter	Pseudoramibacter alactolyticus
Firmicutes	Clostridia	Eubacteriales	Clostridiaceae	Romboutsia	Romboutsia hominis
Firmicutes	Clostridia	Eubacteriales	Clostridiaceae	Romboutsia	Romboutsia lituseburensis
Firmicutes	Clostridia	Eubacteriales	Oscillospiraceae	Ruminococcus	Ruminococcus gnavus
Firmicutes	Clostridia	Eubacteriales	Oscillospiraceae	Ruthenibacterium	Ruthenibacterium lactatiformans
Firmicutes	Bacilli	Lactobacillales	Lactobacillaceae	Schleiferilactobacillus	Schleiferilactobacillus perolens
Proteobacteria	Gammaproteobacteria	Enterobacterales	Enterobacteriaceae	Shigella	Shigella flexneri
Actinobacteriota	Coriobacteriia	Eggerthellales	Eggerthellaceae	Slackia	Slackia exigua
Firmicutes	Bacilli	Caryophanales	Staphylococcaceae	Staphylococcus	Staphylococcus aureus
Firmicutes	Bacilli	Lactobacillales	Streptococcaceae	Streptococcus	Streptococcus anginosus
Firmicutes	Bacilli	Lactobacillales	Streptococcaceae	Streptococcus	Streptococcus australis
Firmicutes	Bacilli	Lactobacillales	Streptococcaceae	Streptococcus	Streptococcus constellatus
Firmicutes	Bacilli	Lactobacillales	Streptococcaceae	Streptococcus	Streptococcus equinus
Firmicutes	Bacilli	Lactobacillales	Streptococcaceae	Streptococcus	Streptococcus gallolyticus
Firmicutes	Bacilli	Lactobacillales	Streptococcaceae	Streptococcus	Streptococcus infantarius
Firmicutes	Bacilli	Lactobacillales	Streptococcaceae	Streptococcus	Streptococcus lutetiensis
Firmicutes	Bacilli	Lactobacillales	Streptococcaceae	Streptococcus	Streptococcus mutans
Firmicutes	Bacilli	Lactobacillales	Streptococcaceae	Streptococcus	Streptococcus parasanguinis
Firmicutes	Bacilli	Lactobacillales	Streptococcaceae	Streptococcus	Streptococcus salivarius
Firmicutes	Bacilli	Lactobacillales	Streptococcaceae	Streptococcus	Streptococcus vestibularis
Firmicutes	Clostridia	Eubacteriales	Clostridiaceae	Terrisporobacter	Terrisporobacter glycolicus
Firmicutes	Clostridia	Eubacteriales	Clostridiaceae	Terrisporobacter	Terrisporobacter petrolearius
Firmicutes	Clostridia	Eubacteriales	Lachnospiraceae	Tyzzerella	Tyzzerella nexilis
Firmicutes	Negativicutes	Veillonellales	Veillonellaceae	Veillonella	Veillonella parvula
Firmicutes	Negativicutes	Veillonellales	Veillonellaceae	Veillonella	Veillonella rogosae
Firmicutes	Negativicutes	Veillonellales	Veillonellaceae	Veillonella	Veillonella sp[3]
Firmicutes	Bacilli	Caryophanales	Bacillaceae	Virgibacillus	Virgibacillus proomii
Firmicutes	Bacilli	Lactobacillales	Leuconostocaceae	Weissella	Weissella cibaria
Firmicutes	Bacilli	Lactobacillales	Leuconostocaceae	Weissella	Weissella viridescens

## Sheet: CD-isolated list
Cultured gut microbiota in Crohn's disease
Phylum	Class	Order	Family	Genus	Species
Actinobacteriota	Actinobacteria	Actinomycetales	Actinomycetaceae	Actinomyces	Actinomyces radingae
Actinobacteriota	Actinobacteria	Actinomycetales	Actinomycetaceae	Actinomyces	Actinomyces turicensis
Actinobacteriota	Actinobacteria	Actinomycetales	Actinomycetaceae	Actinomyces	Actinomyces urogenitalis
Actinobacteriota	Actinobacteria	Actinomycetales	Actinomycetaceae	Varibaculum	Varibaculum cambriense
Actinobacteriota	Actinobacteria	Bifidobacteriales	Bifidobacteriaceae	Bifidobacterium	Bifidobacterium adolescentis
Actinobacteriota	Actinobacteria	Bifidobacteriales	Bifidobacteriaceae	Bifidobacterium	Bifidobacterium bifidum
Actinobacteriota	Actinobacteria	Bifidobacteriales	Bifidobacteriaceae	Bifidobacterium	Bifidobacterium breve
Actinobacteriota	Actinobacteria	Bifidobacteriales	Bifidobacteriaceae	Bifidobacterium	Bifidobacterium catenulatum
Actinobacteriota	Actinobacteria	Bifidobacteriales	Bifidobacteriaceae	Bifidobacterium	Bifidobacterium dentium
Actinobacteriota	Actinobacteria	Bifidobacteriales	Bifidobacteriaceae	Bifidobacterium	Bifidobacterium longum
Actinobacteriota	Actinobacteria	Bifidobacteriales	Bifidobacteriaceae	Bifidobacterium	Bifidobacterium longum subsp. suillum
Actinobacteriota	Actinobacteria	Bifidobacteriales	Bifidobacteriaceae	Bifidobacterium	Bifidobacterium pseudocatenulatum
Actinobacteriota	Actinobacteria	Micrococcales	Dermacoccaceae	Dermacoccus	Dermacoccus sp[3]
Actinobacteriota	Actinobacteria	Micrococcales	Micrococcaceae	Rothia	Rothia mucilaginosa
Actinobacteriota	Actinobacteria	Mycobacteriales	Corynebacteriaceae	Corynebacterium	Corynebacterium amycolatum
Actinobacteriota	Actinobacteria	Mycobacteriales	Corynebacteriaceae	Corynebacterium	Corynebacterium aurimucosum
Actinobacteriota	Actinobacteria	Mycobacteriales	Corynebacteriaceae	Corynebacterium	Corynebacterium pyruviciproducens
Actinobacteriota	Actinobacteria	Propionibacteriales	Propionibacteriaceae	Propionibacterium	Propionibacterium sp[2]
Actinobacteriota	Coriobacteriia	Coriobacteriales	Coriobacteriaceae	Collinsella	Collinsella aerofaciens
Actinobacteriota	Coriobacteriia	Eggerthellales	Eggerthellaceae	Eggerthella	Eggerthella lenta
Actinobacteriota	Coriobacteriia	Eggerthellales	Eggerthellaceae	Gordonibacter	Gordonibacter pamelaeae
Actinobacteriota	Coriobacteriia	Eggerthellales	Eggerthellaceae	Slackia	Slackia exigua
Bacteroidota	Bacteroidia	Bacteroidales	Bacteroidaceae	Bacteroides	Bacteroides caccae
Bacteroidota	Bacteroidia	Bacteroidales	Bacteroidaceae	Bacteroides	Bacteroides faecis
Bacteroidota	Bacteroidia	Bacteroidales	Bacteroidaceae	Bacteroides	Bacteroides fragilis
Bacteroidota	Bacteroidia	Bacteroidales	Bacteroidaceae	Bacteroides	Bacteroides koreensis
Bacteroidota	Bacteroidia	Bacteroidales	Bacteroidaceae	Bacteroides	Bacteroides nordii
Bacteroidota	Bacteroidia	Bacteroidales	Bacteroidaceae	Bacteroides	Bacteroides ovatus
Bacteroidota	Bacteroidia	Bacteroidales	Bacteroidaceae	Bacteroides	Bacteroides stercoris
Bacteroidota	Bacteroidia	Bacteroidales	Bacteroidaceae	Bacteroides	Bacteroides thetaiotaomicron
Bacteroidota	Bacteroidia	Bacteroidales	Bacteroidaceae	Bacteroides	Bacteroides uniformis
Bacteroidota	Bacteroidia	Bacteroidales	Bacteroidaceae	Bacteroides	Bacteroides vulgatus
Bacteroidota	Bacteroidia	Bacteroidales	Odoribacteraceae	Odoribacter	Odoribacter splanchnicus
Bacteroidota	Bacteroidia	Bacteroidales	Porphyromonadaceae	Porphyromonas	Porphyromonas bennonis
Bacteroidota	Bacteroidia	Bacteroidales	Prevotellaceae	Prevotella	Prevotella buccae
Bacteroidota	Bacteroidia	Bacteroidales	Prevotellaceae	Prevotella	Prevotella buccalis
Bacteroidota	Bacteroidia	Bacteroidales	Rikenellaceae	Alistipes	Alistipes indistinctus
Bacteroidota	Bacteroidia	Bacteroidales	Rikenellaceae	Alistipes	Alistipes onderdonkii
Bacteroidota	Bacteroidia	Bacteroidales	Tannerellaceae	Parabacteroides	Parabacteroides distasonis
Bacteroidota	Bacteroidia	Bacteroidales	Tannerellaceae	Parabacteroides	Parabacteroides johnsonii
Bacteroidota	Bacteroidia	Bacteroidales	Tannerellaceae	Parabacteroides	Parabacteroides merdae
Firmicutes	Bacilli	Caryophanales	Bacillaceae	Bacillus	Bacillus aerius
Firmicutes	Bacilli	Caryophanales	Bacillaceae	Bacillus	Bacillus altitudinis
Firmicutes	Bacilli	Caryophanales	Bacillaceae	Bacillus	Bacillus cereus
Firmicutes	Bacilli	Caryophanales	Bacillaceae	Bacillus	Bacillus haynesii
Firmicutes	Bacilli	Caryophanales	Bacillaceae	Bacillus	Bacillus infantis
Firmicutes	Bacilli	Caryophanales	Bacillaceae	Bacillus	Bacillus kochii
Firmicutes	Bacilli	Caryophanales	Bacillaceae	Bacillus	Bacillus licheniformis
Firmicutes	Bacilli	Caryophanales	Bacillaceae	Bacillus	Bacillus pumilus
Firmicutes	Bacilli	Caryophanales	Bacillaceae	Bacillus	Bacillus subtilis
Firmicutes	Bacilli	Caryophanales	Bacillaceae	Bacillus	Bacillus velezensis
Firmicutes	Bacilli	Caryophanales	Bacillaceae	Oceanobacillus	Oceanobacillus aidingensis
Firmicutes	Bacilli	Caryophanales	Bacillaceae	Oceanobacillus	Oceanobacillus oncorhynchi
Firmicutes	Bacilli	Caryophanales	Bacillaceae	Oceanobacillus	Oceanobacillus oncorhynchi subsp. incaldanensis
Firmicutes	Bacilli	Caryophanales	Bacillaceae	Virgibacillus	Virgibacillus proomii
Firmicutes	Bacilli	Caryophanales	Caryophanaceae	Lysinibacillus	Lysinibacillus fusiformis
Firmicutes	Bacilli	Caryophanales	Caryophanaceae	Lysinibacillus	Lysinibacillus sphaericus
Firmicutes	Bacilli	Caryophanales	Staphylococcaceae	Staphylococcus	Staphylococcus epidermidis
Firmicutes	Bacilli	Lactobacillales	Enterococcaceae	Enterococcus	Enterococcus avium
Firmicutes	Bacilli	Lactobacillales	Enterococcaceae	Enterococcus	Enterococcus casseliflavus
Firmicutes	Bacilli	Lactobacillales	Enterococcaceae	Enterococcus	Enterococcus diestrammenae
Firmicutes	Bacilli	Lactobacillales	Enterococcaceae	Enterococcus	Enterococcus dispar
Firmicutes	Bacilli	Lactobacillales	Enterococcaceae	Enterococcus	Enterococcus durans
Firmicutes	Bacilli	Lactobacillales	Enterococcaceae	Enterococcus	Enterococcus faecalis
Firmicutes	Bacilli	Lactobacillales	Enterococcaceae	Enterococcus	Enterococcus faecium
Firmicutes	Bacilli	Lactobacillales	Enterococcaceae	Enterococcus	Enterococcus gallinarum
Firmicutes	Bacilli	Lactobacillales	Enterococcaceae	Enterococcus	Enterococcus hirae
Firmicutes	Bacilli	Lactobacillales	Enterococcaceae	Enterococcus	Enterococcus raffinosus
Firmicutes	Bacilli	Lactobacillales	Enterococcaceae	Vagococcus	Vagococcus fluvialis
Firmicutes	Bacilli	Lactobacillales	Enterococcaceae	Vagococcus	Vagococcus lutrae
Firmicutes	Bacilli	Lactobacillales	Lactobacillaceae	Lacticaseibacillus	Lacticaseibacillus paracasei
Firmicutes	Bacilli	Lactobacillales	Lactobacillaceae	Lacticaseibacillus	Lacticaseibacillus rhamnosus
Firmicutes	Bacilli	Lactobacillales	Lactobacillaceae	Lactiplantibacillus	Lactiplantibacillus plantarum
Firmicutes	Bacilli	Lactobacillales	Lactobacillaceae	Lactobacillus	Lactobacillus crispatus
Firmicutes	Bacilli	Lactobacillales	Lactobacillaceae	Lentilactobacillus	Lentilactobacillus parabuchneri
Firmicutes	Bacilli	Lactobacillales	Lactobacillaceae	Levilactobacillus	Levilactobacillus brevis
Firmicutes	Bacilli	Lactobacillales	Lactobacillaceae	Ligilactobacillus	Ligilactobacillus salivarius
Firmicutes	Bacilli	Lactobacillales	Lactobacillaceae	Limosilactobacillus	Limosilactobacillus fermentum
Firmicutes	Bacilli	Lactobacillales	Lactobacillaceae	Pediococcus	Pediococcus acidilactici
Firmicutes	Bacilli	Lactobacillales	Leuconostocaceae	Weissella	Weissella cibaria
Firmicutes	Bacilli	Lactobacillales	Streptococcaceae	Lactococcus	Lactococcus garvieae
Firmicutes	Bacilli	Lactobacillales	Streptococcaceae	Lactococcus	Lactococcus lactis
Firmicutes	Bacilli	Lactobacillales	Streptococcaceae	Streptococcus	Streptococcus agalactiae
Firmicutes	Bacilli	Lactobacillales	Streptococcaceae	Streptococcus	Streptococcus anginosus
Firmicutes	Bacilli	Lactobacillales	Streptococcaceae	Streptococcus	Streptococcus constellatus
Firmicutes	Bacilli	Lactobacillales	Streptococcaceae	Streptococcus	Streptococcus equinus
Firmicutes	Bacilli	Lactobacillales	Streptococcaceae	Streptococcus	Streptococcus gordonii
Firmicutes	Bacilli	Lactobacillales	Streptococcaceae	Streptococcus	Streptococcus infantis
Firmicutes	Bacilli	Lactobacillales	Streptococcaceae	Streptococcus	Streptococcus lutetiensis
Firmicutes	Bacilli	Lactobacillales	Streptococcaceae	Streptococcus	Streptococcus parasanguinis
Firmicutes	Bacilli	Lactobacillales	Streptococcaceae	Streptococcus	Streptococcus salivarius
Firmicutes	Clostridia	Eubacteriales	Clostridiaceae	Clostridium	Clostridium aldenense
Firmicutes	Clostridia	Eubacteriales	Clostridiaceae	Clostridium	Clostridium bolteae
Firmicutes	Clostridia	Eubacteriales	Clostridiaceae	Clostridium	Clostridium butyricum
Firmicutes	Clostridia	Eubacteriales	Clostridiaceae	Clostridium	Clostridium citroniae
Firmicutes	Clostridia	Eubacteriales	Clostridiaceae	Clostridium	Clostridium clostridioforme
Firmicutes	Clostridia	Eubacteriales	Clostridiaceae	Clostridium	Clostridium difficile
Firmicutes	Clostridia	Eubacteriales	Clostridiaceae	Clostridium	Clostridium innocuum
Firmicutes	Clostridia	Eubacteriales	Clostridiaceae	Clostridium	Clostridium lavalense
Firmicutes	Clostridia	Eubacteriales	Clostridiaceae	Clostridium	Clostridium paraputrificum
Firmicutes	Clostridia	Eubacteriales	Clostridiaceae	Clostridium	Clostridium perfringens
Firmicutes	Clostridia	Eubacteriales	Clostridiaceae	Clostridium	Clostridium ramosum
Firmicutes	Clostridia	Eubacteriales	Clostridiaceae	Clostridium	Clostridium scindens
Firmicutes	Clostridia	Eubacteriales	Clostridiaceae	Clostridium	Clostridium symbiosum
Firmicutes	Clostridia	Eubacteriales	Clostridiaceae	Clostridium	Clostridium tertium
Firmicutes	Clostridia	Eubacteriales	Clostridiaceae	Hungatella	Hungatella effluvii
Firmicutes	Clostridia	Eubacteriales	Clostridiaceae	Hungatella	Hungatella hathewayi
Firmicutes	Clostridia	Eubacteriales	Clostridiaceae	Paeniclostridium	Paeniclostridium sordellii
Firmicutes	Clostridia	Eubacteriales	Clostridiaceae	Paraclostridium	Paraclostridium benzoelyticum
Firmicutes	Clostridia	Eubacteriales	Clostridiaceae	Paraclostridium	Paraclostridium bifermentans
Firmicutes	Clostridia	Eubacteriales	Eubacteriaceae	Eubacterium	Eubacterium callanderi
Firmicutes	Clostridia	Eubacteriales	Eubacteriaceae	Eubacterium	Eubacterium limosum
Firmicutes	Clostridia	Eubacteriales	Eubacteriaceae	Eubacterium	Eubacterium maltosivorans
Firmicutes	Clostridia	Eubacteriales	Eubacteriaceae	Eubacterium	Eubacterium sp[2]
Firmicutes	Clostridia	Eubacteriales	Lachnospiraceae	Anaerostipes	Anaerostipes caccae
Firmicutes	Clostridia	Eubacteriales	Lachnospiraceae	Anaerostipes	Anaerostipes hadrus
Firmicutes	Clostridia	Eubacteriales	Lachnospiraceae	Blautia	Blautia coccoides
Firmicutes	Clostridia	Eubacteriales	Lachnospiraceae	Blautia	Blautia hansenii
Firmicutes	Clostridia	Eubacteriales	Lachnospiraceae	Blautia	Blautia hominis
Firmicutes	Clostridia	Eubacteriales	Lachnospiraceae	Blautia	Blautia sp.
Firmicutes	Clostridia	Eubacteriales	Lachnospiraceae	Faecalicatena	Faecalicatena contorta
Firmicutes	Clostridia	Eubacteriales	Lachnospiraceae	Faecalimonas	Faecalimonas umbilicata
Firmicutes	Clostridia	Eubacteriales	Oscillospiraceae	Anaerotruncus	Anaerotruncus colihominis
Firmicutes	Clostridia	Eubacteriales	Oscillospiraceae	Drancourtella	Drancourtella massiliensis
Firmicutes	Clostridia	Eubacteriales	Oscillospiraceae	Flavonifractor	Flavonifractor plautii
Firmicutes	Clostridia	Eubacteriales	Oscillospiraceae	Ruminococcus	Ruminococcus gnavus
Firmicutes	Clostridia	Eubacteriales	Oscillospiraceae	Ruminococcus	Ruminococcus torques
Firmicutes	Clostridia	Eubacteriales	Peptoniphilaceae	Anaerococcus	Anaerococcus jeddahensis
Firmicutes	Clostridia	Eubacteriales	Peptoniphilaceae	Peptoniphilus	Peptoniphilus gorbachii
Firmicutes	Clostridia	Eubacteriales	Peptoniphilaceae	Peptoniphilus	Peptoniphilus grossensis
Firmicutes	Clostridia	Eubacteriales	Peptoniphilaceae	Peptoniphilus	Peptoniphilus harei
Firmicutes	Clostridia	Eubacteriales	Peptoniphilaceae	Peptoniphilus	Peptoniphilus indolicus
Firmicutes	Clostridia	Eubacteriales	Peptoniphilaceae	Peptoniphilus	Peptoniphilus koenoeneniae
Firmicutes	Clostridia	Eubacteriales	Peptoniphilaceae	Peptoniphilus	Peptoniphilus lacrimalis
Firmicutes	Clostridia	Eubacteriales	Peptoniphilaceae	Peptoniphilus	Peptoniphilus timonensis
Firmicutes	Erysipelotrichia	Erysipelotrichales	Coprobacillaceae	Coprobacillus	Coprobacillus cateniformis
Firmicutes	Erysipelotrichia	Erysipelotrichales	Erysipelotrichaceae	Brevimicrobium	Brevimicrobium sp.
Firmicutes	Erysipelotrichia	Erysipelotrichales	Erysipelotrichaceae	Longicatena	Longicatena caecimuris
Firmicutes	Erysipelotrichia	Erysipelotrichales	Erysipelotrichaceae	Solobacterium	Solobacterium moorei
Firmicutes	Negativicutes	Selenomonadales	Selenomonadaceae	Selenobaculum	Selenobaculum gbiensis
Firmicutes	Negativicutes	Veillonellales	Veillonellaceae	Megasphaera	Megasphaera micronuciformis
Firmicutes	Negativicutes	Veillonellales	Veillonellaceae	Veillonella	Veillonella atypica
Firmicutes	Negativicutes	Veillonellales	Veillonellaceae	Veillonella	Veillonella parvula
Firmicutes	Negativicutes	Veillonellales	Veillonellaceae	Veillonella	Veillonella sp[3]
Firmicutes	Tissierellia	Tissierellales	Peptoniphilaceae	Finegoldia	Finegoldia magna
Firmicutes	Tissierellia	Tissierellales	Tissierellaceae	Anaerosalibacter	Anaerosalibacter massiliensis
Fusobacteriota	Fusobacteriia	Fusobacteriales	Fusobacteriaceae	Fusobacterium	Fusobacterium ulcerans
Fusobacteriota	Fusobacteriia	Fusobacteriales	Fusobacteriaceae	Fusobacterium	Fusobacterium varium
Proteobacteria	Betaproteobacteria	Burkholderiales	Sutterellaceae	Sutterella	Sutterella wadsworthensis
Proteobacteria	Gammaproteobacteria	Aeromonadales	Aeromonadaceae	Aeromonas	Aeromonas jandaei
Proteobacteria	Gammaproteobacteria	Aeromonadales	Aeromonadaceae	Aeromonas	Aeromonas media
Proteobacteria	Gammaproteobacteria	Aeromonadales	Aeromonadaceae	Aeromonas	Aeromonas veronii bv. veronii
Proteobacteria	Gammaproteobacteria	Enterobacterales	Enterobacteriaceae	Citrobacter	Citrobacter amalonaticus
Proteobacteria	Gammaproteobacteria	Enterobacterales	Enterobacteriaceae	Citrobacter	Citrobacter braakii
Proteobacteria	Gammaproteobacteria	Enterobacterales	Enterobacteriaceae	Citrobacter	Citrobacter freundii
Proteobacteria	Gammaproteobacteria	Enterobacterales	Enterobacteriaceae	Citrobacter	Citrobacter koseri
Proteobacteria	Gammaproteobacteria	Enterobacterales	Enterobacteriaceae	Enterobacter	Enterobacter asburiae
Proteobacteria	Gammaproteobacteria	Enterobacterales	Enterobacteriaceae	Enterobacter	Enterobacter cloacae
Proteobacteria	Gammaproteobacteria	Enterobacterales	Enterobacteriaceae	Enterobacter	Enterobacter tabaci
Proteobacteria	Gammaproteobacteria	Enterobacterales	Enterobacteriaceae	Escherichia	Escherichia coli
Proteobacteria	Gammaproteobacteria	Enterobacterales	Enterobacteriaceae	Escherichia	Escherichia marmotae
Proteobacteria	Gammaproteobacteria	Enterobacterales	Enterobacteriaceae	Klebsiella	Klebsiella aerogenes
Proteobacteria	Gammaproteobacteria	Enterobacterales	Enterobacteriaceae	Klebsiella	Klebsiella oxytoca
Proteobacteria	Gammaproteobacteria	Enterobacterales	Enterobacteriaceae	Klebsiella	Klebsiella pneumoniae
Proteobacteria	Gammaproteobacteria	Enterobacterales	Enterobacteriaceae	Klebsiella	Klebsiella variicola
Proteobacteria	Gammaproteobacteria	Enterobacterales	Morganellaceae	Morganella	Morganella morganii
Proteobacteria	Gammaproteobacteria	Enterobacterales	Morganellaceae	Proteus	Proteus hauseri
Proteobacteria	Gammaproteobacteria	Enterobacterales	Morganellaceae	Proteus	Proteus mirabilis
Proteobacteria	Gammaproteobacteria	Enterobacterales	Morganellaceae	Proteus	Proteus penneri
Proteobacteria	Gammaproteobacteria	Enterobacterales	Morganellaceae	Proteus	Proteus vulgaris

## Sheet: Novel sepceis
Putative novel species isolated from the gut microbiota of IBD patients in a culturomics study.
no.	Putative novel speceis	Family	Novelty	Origin	GenBank assession no.	16s rRNA sequence similarity to closely related species	Culture collection no.	Oxygen tolerance	Gram	Catalase	Oxidase	Microscopic observations	Colony morphology
1	Blautia sp. ICN-22010	Lachnospiraceae	sp. nov.	CD	OP753716	#98.51% to B. hominis strain KB1T	KCTC 25603, JCM 36002	-	+	-	-	oval-shaped (0.6–0.7 × 1.0–2.0 μm)	The colonies were creamy white, convex, and circular ranging in diameter from 1 mm to 4 mm.
2	Pseudogracilibacillus sp. ICA-222130	Bacillaceae	sp. nov.	UC	OP753731	95.81% to P. marinus strain NIOT.bflm.S4T	KCTC 43474, JCM 36064	+	+	+	+	long rods (0.5 × 1.4 – 4.5 μm)	The colonies were white, irregular, raised, and opaque.
3	Lagierella sp. ICN-221743	Peptoniphilaceae	sp. nov.	UC	OP762695	##97.48% to L. massiliensis strain KB1T	KCTC 25624, JCM 36016	-	+	-	+	cocci (0.5–0.7 μm in diameter)	The colonies had punctiform morphology.
4	Selenobaculum gbiensis ICN-92133T	Selenomonadales	gen. nov., sp. nov.	CD	ON753764	93.91% to Massilibacillus massiliensis strain Marseille-P2411T	KCTC 25622, JCM 36070	-	-	-	-	rod-shaped with a rounded end (0.4–0.5 × 1.6–3.2 μm)	The colonies were creamy white, convex, and circular forms less than 1 mm in diameter.
5	Dorea sp. ICN-14282	Lachnospiraceae	sp. nov.	UC	OP753726	98% to D. massiliensis strain AP6T	KCTC 25606, JCM 36197	-	-	-	-	rod-shaped (0.5–0.6 × 0.8–4.6 μm)	The colonies had punctiform morphology.
6	Phocaeicola sp. ICN-14070	Bacteroidaceae	sp. nov.	UC	OP753733	98.29% to P. plebeius strain M12T	KCCM 90503, KCTC 25609, JCM 36144	-	-	-	+	cocci (0.8–0.9 μm in diameter)	The colonies were creamy white, convex, and circular ranging from 1 mm to 1.5 mm.
7	Mediterraneibacter sp. ICN-202921	Lachnospiraceae	sp. nov.	UC	OP762692	98.36% to M. massiliensis AT10T	KCCM 90507, JCM 36196	-	+	-	-	rod-shaped (0.3 × 0.8–2.2 μm)	The colonies were creamy white, a little moist, convex, and circular colonies less than 1 mm in diameter.
#Strain ICN-22010 showed a sequence similarity of 98.51% to B. hominis strain KB1T when we found the strain, but it showed a sequence similarity of 99.79% to B. celeris strain NSJ-34T, which was reported earlier at the time of our submission.
##Strain ICN-221743 showed a sequence similarity of 97.48% to L. massiliensis strain SIT14T when we found the strain, but it showed a sequence similarity of 98.85% to Mediannikoviicoccus vaginalis Marseille-Q5883T, which was reported earlier at the time of our submission.
A paper containing detailed characteristics of Selenobaculum gbiensis gen. nov., sp. nov. has been accepted on Sep 4th in the Scientific Reports (ISSN 2045-2322).
