# Supplementary material for: Gut microbiota in inflammatory bowel disease: a combined culturomics and metagenomics perspective
Source: Research Square preprint supplement (doi:10.21203/rs.3.rs-3343885/v1), 2023-09-18

## Additional file 2

**Fig. S1. Relative abundances (%) at phylum level according to the disease severity in the UC**

**group.** The HC group was composed of healthy individuals who had not been diagnosed with other diseases, including IBD, and the severity was classified as normal. The UC group was divided into three severity groups: mild, moderate, and severe, diagnosed based on Truelove-Witts and Mayo indices. One-way ANOVA using the Kruskal-Wallis test was used to calculate statistical significance which is indicated as follows: \* $p < 0.05$  and \*\* $p < 0.01$ . **a**, *Actinobacteriota*; **b**, *Proteobacteria*; **c**, *Firmicutes*; **d**, *Bacteroidota*.

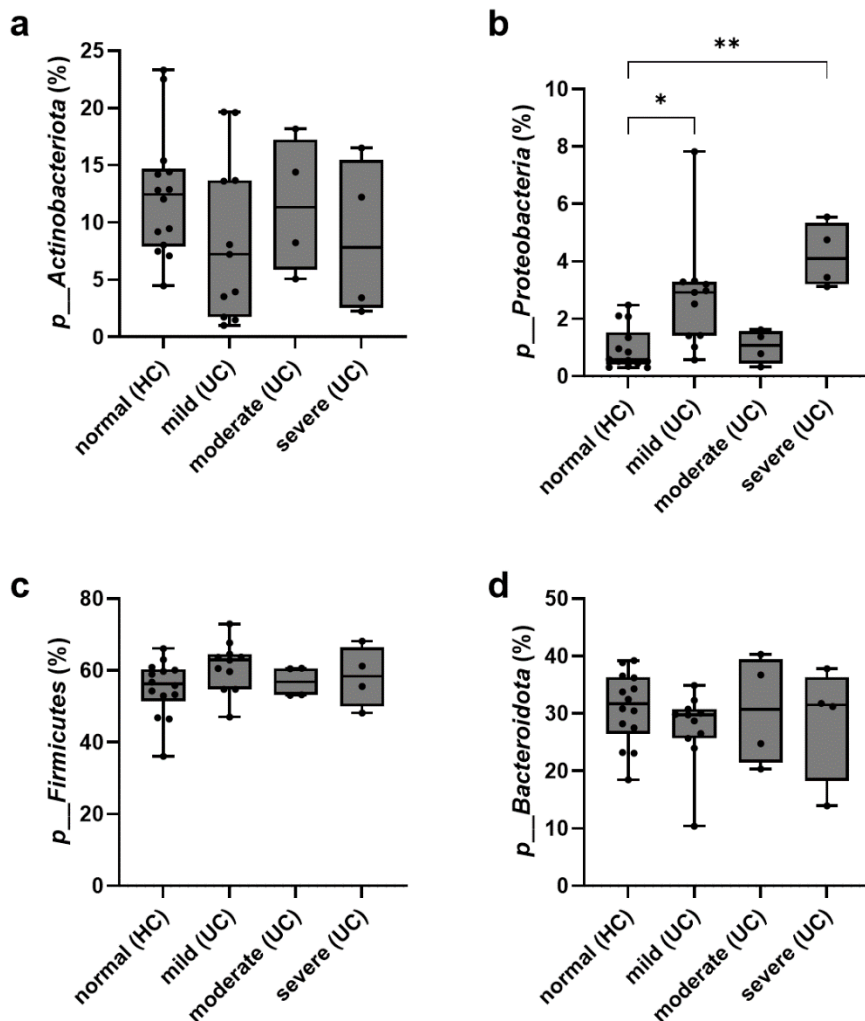

**Fig. S2. Relative abundances (%) at phylum level according to the disease severity in the CD**

**group.** The HC group was composed of healthy individuals who had not been diagnosed with other diseases, including IBD, and the severity was classified as normal. The UC group was divided into three severity groups: mild, moderate, and severe, diagnosed based on Truelove-Witts and Mayo indices. One-way ANOVA using the Kruskal-Wallis test was used to calculate statistical significance which is indicated as follows:  $**p < 0.01$ . **a**, *Actinobacteriota*; **b**, *Proteobacteria*; **c**, *Firmicutes*; **d**, *Bacteroidota*.

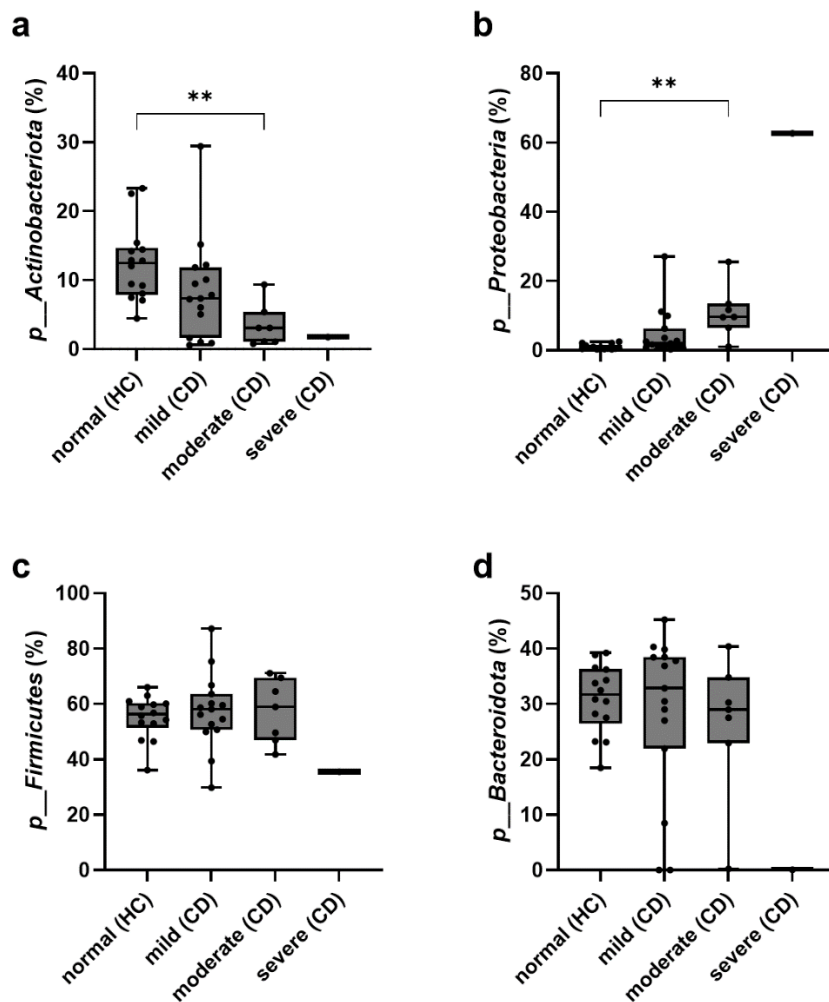

Supplement: Supplementary file 1 [file 61d02aa029fd6dbcb48481ae.pdf]
