# Supplementary material for: Gut microbiota in inflammatory bowel disease: a combined culturomics and metagenomics perspective
Source: Research Square preprint supplement (doi:10.21203/rs.3.rs-3343885/v1), 2023-09-18
Supplement: Supplementary file 2 [file 5a9d1a389679491df7077afb.xlsx]

## Sheet: Identified spp.
Identified species in culturomics and metagenomics.
no.	Metagenomics (identified species)	no.	Culturomics species
1	Parabacteroides merdae	1	Actinomyces europaeus
2	Solobacterium moorei	2	Actinomyces radingae
3	Clostridium methylpentosum	3	Actinomyces turicensis
4	Harryflintia acetispora	4	Actinomyces urogenitalis
5	Ruminococcus lactaris	5	Aeromonas jandaei
6	Peptoniphilus grossensis	6	Aeromonas media
7	Eubacterium limosum	7	Aeromonas veronii bv. veronii
8	Prevotella buccae	8	Alistipes finegoldii
9	Bacteroides coprophilus	9	Alistipes indistinctus
10	Senegalimassilia anaerobia	10	Alistipes onderdonkii
11	Holdemania massiliensis	11	Alistipes putredinis
12	Bacteroides caccae	12	Alistipes senegalensis
13	Peptococcus niger	13	Alistipes shahii
14	Collinsella stercoris	14	Allisonella histaminiformans
15	Anaerostipes hadrus	15	Amedibacterium intestinale
16	Intestinimonas timonensis	16	Anaerococcus hydrogenalis
17	Paraprevotella xylaniphila	17	Anaerococcus jeddahensis
18	Corynebacterium durum	18	Anaerococcus vaginalis
19	Veillonella denticariosi	19	Anaerosalibacter massiliensis
20	Ruthenibacterium lactatiformans	20	Anaerostipes caccae
21	Peptoniphilus duerdenii	21	Anaerostipes hadrus
22	Lactobacillus herbarum	22	Anaerotignum lactatifermentans
23	Monoglobus pectinilyticus	23	Anaerotruncus colihominis
24	Dialister invisus	24	Aneurinibacillus aneurinilyticus
25	Lactobacillus kitasatonis	25	Arcanobacterium urinimassiliense
26	Blautia glucerasea	26	Asaccharospora irregularis
27	Finegoldia magna	27	Atopobium parvulum
28	Bacteroides coprocola	28	Bacillus aerius
29	Streptococcus troglodytae	29	Bacillus altitudinis
30	Prevotella bivia	30	Bacillus aquiflavi
31	Anaeroglobus geminatus	31	Bacillus cereus
32	Streptococcus vestibularis	32	Bacillus clausii
33	Cloacibacillus porcorum	33	Bacillus haynesii
34	Clostridium leptum	34	Bacillus infantis
35	Porphyromonas asaccharolytica	35	Bacillus kochii
36	Streptococcus pneumoniae	36	Bacillus licheniformis
37	Fusobacterium periodonticum	37	Bacillus mojavensis
38	Bacteroides intestinalis	38	Bacillus pervagus
39	Bacteroides uniformis	39	Bacillus pumilus
40	Bacteroides clarus	40	Bacillus safensis
41	Blautia stercoris	41	Bacillus subtilis
42	Blautia caecimuris	42	Bacillus velezensis
43	Veillonella ratti	43	Bacillus badius
44	Megasphaera elsdenii	44	Bacillus megaterium
45	Eubacterium siraeum	45	Bacillus weihenstephanensis
46	Bacteroides plebeius	46	Bacteroides caccae
47	Gemmiger formicilis	47	Bacteroides cellulosilyticus
48	Bacteroides finegoldii	48	Bacteroides coprocola
49	Eubacterium eligens	49	Bacteroides coprophilus
50	Bacteroides stercoris	50	Bacteroides eggerthii
51	Fusobacterium mortiferum	51	Bacteroides faecis
52	Bacteroides cellulosilyticus	52	Bacteroides fragilis
53	Peptostreptococcus stomatis	53	Bacteroides humanifaecis
54	Dickeya phage	54	Bacteroides intestinalis
55	Alistipes finegoldii	55	Bacteroides koreensis
56	Sutterella parvirubra	56	Bacteroides massiliensis
57	Mycoplasmopsis equigenitalium	57	Bacteroides nordii
58	Anaerotignum lactatifermentans	58	Bacteroides ovatus
59	Catenibacillus scindens	59	Bacteroides plebeius
60	Dysgonomonas mossii	60	Bacteroides stercoris
61	Eggerthella lenta	61	Bacteroides thetaiotaomicron
62	Clostridium paraputrificum	62	Bacteroides uniformis
63	Alistipes indistinctus	63	Bacteroides vulgatus
64	Escherichia-Shigella	64	Bacteroides xylanisolvens
65	Massiliomicrobiota timonensis	65	Barnesiella intestinihominis
66	Fenollaria massiliensis	66	Bifidobacterium adolescentis
67	Campylobacter concisus	67	Bifidobacterium animalis
68	Bacteroides massiliensis	68	Bifidobacterium bifidum
69	Clostridium glycyrrhizinilyticum	69	Bifidobacterium breve
70	Blautia hydrogenotrophica	70	Bifidobacterium catenulatum
71	Ruminococcus bicirculans	71	Bifidobacterium dentium
72	Flavonifractor plautii	72	Bifidobacterium faecale
73	Catabacter hongkongensis	73	Bifidobacterium longum
74	Parasutterella excrementihominis	74	Bifidobacterium longum subsp. suillum
75	Clostridium aldenense	75	Bifidobacterium pseudocatenulatum
76	Clostridium septicum	76	Blautia caecimuris
77	Porphyromonadaceae bacterium	77	Blautia coccoides
78	Weissella viridescens	78	Blautia faecis
79	Paraprevotella clara	79	Blautia sp. (putative novel)
80	Pectinatus cerevisiiphilus	80	Blautia hansenii
81	Agathobaculum butyriciproducens	81	Blautia hominis
82	Anaerofustis stercorihominis	82	Blautia sp. (putative novel)
83	Absiella dolichum	83	Blautia intestinalis
84	Frisingicoccus caecimuris	84	Blautia sp. (putative novel)
85	Eubacterium ramulus	85	Blautia obeum
86	Phascolarctobacterium faecium	86	Blautia producta
87	Prevotella timonensis	87	Blautia wexlerae
88	Roseburia inulinivorans	88	Brevimicrobium sp. (putative novel)
89	Ruminococcus torques	89	Butyricimonas sp. (putative novel)
90	Enterococcus raffinosus	90	Butyricimonas phoceensis
91	Fusobacterium ulcerans	91	Campylobacter hominis
92	Alistipes putredinis	92	Campylobacter ureolyticus
93	Bifidobacterium dentium	93	Casaltella massiliensis
94	Pediococcus inopinatus	94	Christensenella minuta
95	Prevotella stercorea	95	Citrobacter amalonaticus
96	Prevotella nigrescens	96	Citrobacter braakii
97	Actinomyces graevenitzii	97	Citrobacter freundii
98	Bilophila wadsworthia	98	Citrobacter koseri
99	Chlamydia trachomatis	99	Citrobacter murliniae
100	Pseudomonas monteilii	100	Citrobacter sedlakii
101	Parasutterella secunda	101	Clostridium aldenense
102	Roseburia hominis	102	Clostridium baratii
103	Lactobacillus apis	103	Clostridium bolteae
104	Gordonibacter faecihominis	104	Clostridium butyricum
105	Lactobacillus iners	105	Clostridium cadaveris
106	Prevotella buccalis	106	Clostridium celerecrescens
107	Absiella argi	107	Clostridium citroniae
108	Haemophilus pittmaniae	108	Clostridium clostridioforme
109	Bacteroides vulgatus	109	Clostridium cochlearium
110	Collinsella aerofaciens	110	Clostridium culturomicium
111	Desulfovibrio	111	Clostridioides difficile
112	Ruminococcus faecis	112	Clostridium fessum
113	Bacteroides thetaiotaomicron	113	Clostridium glycyrrhizinilyticum
114	Bacteroides caecigallinarum	114	Clostridium innocuum
115	Cloacibacillus evryensis	115	Clostridium lavalense
116	Alistipes obesi	116	Clostridium paraputrificum
117	Alistipes inops	117	Clostridium perfringens
118	Clostridium asparagiforme	118	Erysipelatoclostridium ramosum
119	Clostridium spiroforme	119	Clostridium scindens
120	Hydrogenoanaerobacterium saccharovorans	120	Clostridium sporogenes
121	Lactococcus formosensis	121	Clostridium symbiosum
122	Bacteroides salyersiae	122	Clostridium tepidum
123	Bifidobacterium catenulatum	123	Clostridium tertium
124	Fusobacterium equinum	124	Collinsella aerofaciens
125	Holdemanella biformis	125	Collinsella intestinalis
126	Butyricimonas virosa	126	Companilactobacillus paralimentarius
127	Odoribacter splanchnicus	127	Coprobacillus cateniformis
128	Sutterella stercoricanis	128	Coprococcus comes
129	Howardella ureilytica	129	Coprococcus sp. (putative novel)
130	Anaerococcus vaginalis	130	Corynebacterium amycolatum
131	Slackia piriformis	131	Corynebacterium aurimucosum
132	Peptostreptococcus anaerobius	132	Corynebacterium coyleae
133	Lactobacillus perolens	133	Corynebacterium glucuronolyticum
134	Eubacterium coprostanoligenes	134	Corynebacterium lipophile_group_F1
135	Bacteroides galacturonicus	135	Corynebacterium provencense
136	Peptoniphilus koenoeneniae	136	Corynebacterium pyruviciproducens
137	Rothia mucilaginosa	137	Corynebacterium tuberculostearicum
138	Prevotella copri	138	Dermacoccus sp[3]
139	Dialister pneumosintes	139	Dielma fastidiosa
140	Lactobacillus panis	140	Dorea sp. (putative novel)
141	Bacteroides xylanisolvens	141	Dorea longicatena
142	Mitsuokella jalaludinii	142	Drancourtella massiliensis
143	Erysipelatoclostridium ramosum	143	Eggerthella lenta
144	Anaerotruncus colihominis	144	Eggerthella sinensis
145	Sanguibacteroides justesenii	145	Eisenbergiella massiliensis
146	Ruminococcus callidus	146	Emergencia timonensis
147	Parabacteroides johnsonii	147	Enterobacter asburiae
148	Megamonas funiformis	148	Enterobacter cloacae
149	Turicibacter sanguinis	149	Enterobacter tabaci
150	Coprobacter secundus	150	Enterobacter asburiae
151	Lactobacillus alimentarius	151	Enterobacter bugandensis
152	Longibaculum muris	152	Enterobacter kobei
153	Slackia isoflavoniconvertens	153	Enterobacter xiangfangensis
154	Christensenella massiliensis	154	Enterocloster asparagiformis
155	Dysgonomonas capnocytophagoides	155	Enterocloster sp. (putative novel)
156	Butyricimonas synergistica	156	Enterococcus asini
157	Bacteroides ovatus	157	Enterococcus avium
158	Gordonibacter urolithinfaciens	158	Enterococcus casseliflavus
159	Lactobacillus farraginis	159	Enterococcus cecorum
160	Clostridium innocuum	160	Enterococcus diestrammenae
161	Enterococcus durans	161	Enterococcus dispar
162	Clostridioides difficile	162	Enterococcus durans
163	Dielma fastidiosa	163	Enterococcus faecalis
164	Phascolarctobacterium succinatutens	164	Enterococcus faecium
165	Faecalibaculum rodentium	165	Enterococcus gallinarum
166	Clostridium indolis	166	Enterococcus hirae
167	Trichuris trichiura	167	Enterococcus mundtii
168	Longicatena caecimuris	168	Enterococcus raffinosus
169	Megasphaera hexanoica	169	Enterococcus thailandicus
170	Veillonella dispar	170	Escherichia coli
171	Enterococcus faecium	171	Escherichia fergusonii
172	Parabacteroides goldsteinii	172	Escherichia marmotae
173	Coprococcus comes	173	Eubacterium callanderi
174	Bifidobacterium bifidum	174	Eubacterium limosum
175	Anaerococcus lactolyticus	175	Eubacterium maltosivorans
176	Oscillibacter ruminantium	176	Eubacterium rectale
177	Faecalicoccus pleomorphus	177	Eubacterium sp[2]
178	Blautia faecis	178	Eubacterium tenue
179	Anaerococcus degeneri	179	Facklamia hominis
180	Peptoniphilus lacrimalis	180	Faecalibacillus intestinalis
181	Parabacteroides distasonis	181	Faecalibacterium prausnitzii
182	Megasphaera micronuciformis	182	Faecalicatena contorta
183	Clostridium sporogenes	183	Faecalicoccus pleomorphus
184	Clostridium subterminale	184	Faecalimonas umbilicata
185	Butyricimonas paravirosa	185	Fenollaria massiliensis
186	Eggerthella sinensis	186	Finegoldia magna
187	Intestinimonas butyriciproducens	187	Flavonifractor plautii
188	Eubacterium hallii	188	Flintibacter sp. (putative novel)
189	Eubacterium sulci	189	Fusobacterium mortiferum
190	Ruminococcus gauvreauii	190	Fusobacterium ulcerans
191	Prevotella salivae	191	Fusobacterium varium
192	Cardiobacterium valvarum	192	Gabonia massiliensis
193	Faecalimonas umbilicata	193	Gabonibacter massiliensis
194	Ruminococcus gnavus	194	Gemella morbillorum
195	Butyricicoccus pullicaecorum	195	Gordonibacter pamelaeae
196	Anaerostipes butyraticus	196	Holdemanella biformis
		197	Holdemanella porci
		198	Hungatella effluvii
		199	Hungatella hathewayi
		200	Intestinimonas butyriciproducens
		201	Intestinitalea sp. (putative novel)
		202	Kallipyga massiliensis
		203	Klebsiella aerogenes
		204	Klebsiella oxytoca
		205	Klebsiella pneumoniae
		206	Klebsiella pneumoniae subsp. rhinoscleromatis
		207	Klebsiella quasipneumoniae subsp. similipneumoniae
		208	Klebsiella variicola
		209	Kluyvera cryocrescens
		210	Lachnoclostridium pacaense
		211	Lacticaseibacillus paracasei
		212	Lacticaseibacillus rhamnosus
		213	Lacticaseibacillus saniviri
		214	Lactiplantibacillus plantarum
		215	Lactobacillus acidophilus
		216	Lactobacillus crispatus
		217	Lactococcus garvieae
		218	Lactococcus lactis
		219	Lactococcus taiwanensis
		220	Lagierella sp. (putative novel)
		221	Latilactobacillus curvatus
		222	Latilactobacillus graminis
		223	Latilactobacillus sakei
		224	Lentilactobacillus buchneri
		225	Lentilactobacillus kefiri
		226	Lentilactobacillus parabuchneri
		227	Lentilactobacillus rapi
		228	Leuconostoc lactis
		229	Leuconostoc mesenteroides
		230	Leuconostoc mesenteroides subsp. dextranicum
		231	Levilactobacillus brevis
		232	Levyella massiliensis
		233	Ligilactobacillus ruminis
		234	Ligilactobacillus salivarius
		235	Limosilactobacillus fermentum
		236	Limosilactobacillus mucosae
		237	Listeria grayi
		238	Loigolactobacillus coryniformis
		239	Longicatena caecimuris
		240	Lysinibacillus boronitolerans
		241	Lysinibacillus fusiformis
		242	Lysinibacillus sphaericus
		243	Lysinibacillus xylanilyticus
		244	Massilibacterium senegalense
		245	Massiliomicrobiota timonensis
		246	Mediterraneibacter faecis
		247	Mediterraneibacter sp. (putative novel)
		248	Mediterraneibacter sp. (putative novel)
		249	Megamonas rupellensis
		250	Megasphaera elsdenii
		251	Megasphaera micronuciformis
		252	Mesosutterella multiformis
		253	Metabacillus halosaccharovorans
		254	Morganella morganii
		255	Murdochiella asaccharolytica
		256	Neobacillus cucumis
		257	Oceanobacillus aidingensis
		258	Oceanobacillus sp. (putative novel)
		259	Oceanobacillus oncorhynchi
		260	Oceanobacillus oncorhynchi subsp. incaldanensis
		261	Odoribacter splanchnicus
		262	Paenibacillus amylolyticus
		263	Paenibacillus barengoltzii
		264	Paeniclostridium sordellii
		265	Pantoea agglomerans
		266	Parabacteroides distasonis
		267	Parabacteroides johnsonii
		268	Parabacteroides merdae
		269	Paraclostridium benzoelyticum
		270	Paraclostridium bifermentans
		271	Paraprevotella clara
		272	Parasutterella excrementihominis
		273	Paratractidigestivibacter faecalis
		274	Pediococcus acidilactici
		275	Pediococcus pentosaceus
		276	Peptoniphilus coxii
		277	Peptoniphilus sp. (putative novel)
		278	Peptoniphilus gorbachii
		279	Peptoniphilus grossensis
		280	Peptoniphilus harei
		281	Peptoniphilus indolicus
		282	Peptoniphilus koenoeneniae
		283	Peptoniphilus lacrimalis
		284	Peptoniphilus lacydonensis
		285	Peptoniphilus pacaensis
		286	Peptoniphilus phoceensis
		287	Peptoniphilus rhinitidis
		288	Peptoniphilus timonensis
		289	Peptoniphilus urinimassiliensis
		290	Peptostreptococcus anaerobius
		291	Peptostreptococcus sp
		292	Phocaeicola sp. (putative novel)
		293	Phocaeicola sp. (putative novel)
		294	Phocaeicola sp. (putative novel)
		295	Phocea massiliensis
		296	Porphyromonas asaccharolytica
		297	Porphyromonas bennonis
		298	Porphyromonas somerae
		299	Prevotella bergensis
		300	Prevotella bivia
		301	Prevotella buccae
		302	Prevotella buccalis
		303	Prevotella denticola
		304	Prevotella sp. (putative novel)
		305	Prevotella timonensis
		306	Propionibacterium sp[2]
		307	Proteus hauseri
		308	Proteus mirabilis
		309	Proteus penneri
		310	Proteus vulgaris
		311	Providencia stuartii
		312	Pseudoflavonifractor gallinarum
		313	Pseudogracilibacillus sp. (putative novel)
		314	Pseudomonas aeruginosa
		315	Pseudomonas citronellolis
		316	Pseudomonas monteilii
		317	Pseudoramibacter alactolyticus
		318	Romboutsia hominis
		319	Romboutsia lituseburensis
		320	Roseburia intestinalis
		321	Rothia mucilaginosa
		322	Ruminococcus bromii
		323	Ruminococcus gnavus
		324	Ruminococcus lactaris
		325	Ruminococcus torques
		326	Ruthenibacterium lactatiformans
		327	Schleiferilactobacillus perolens
		328	Selenobaculum gbiensis
		329	Shigella boydii
		330	Shigella flexneri
		331	Shigella sonnei
		332	Siminovitchia acidinfaciens
		333	Slackia exigua
		334	Solobacterium moorei
		335	Staphylococcus aureus
		336	Staphylococcus epidermidis
		337	Streptococcus agalactiae
		338	Streptococcus anginosus
		339	Streptococcus australis
		340	Streptococcus constellatus
		341	Streptococcus equinus
		342	Streptococcus gallolyticus
		343	Streptococcus gallolyticus subsp. pasteurianus
		344	Streptococcus sp. (putative novel)
		345	Streptococcus gordonii
		346	Streptococcus infantarius
		347	Streptococcus infantis
		348	Streptococcus koreensis
		349	Streptococcus lutetiensis
		350	Streptococcus mitis
		351	Streptococcus mutans
		352	Streptococcus oralis
		353	Streptococcus parasanguinis
		354	Streptococcus pneumoniae
		355	Streptococcus salivarius
		356	Streptococcus sanguinis
		357	Streptococcus vestibularis
		358	Sutterella massiliensis
		359	Sutterella wadsworthensis
		360	Terrisporobacter glycolicus
		361	Terrisporobacter petrolearius
		362	Tyzzerella nexilis
		363	Ureibacillus massiliensis
		364	Vagococcus fluvialis
		365	Vagococcus lutrae
		366	Varibaculum cambriense
		367	Veillonella atypica
		368	Veillonella dispar
		369	Veillonella parvula
		370	Veillonella rogosae
		371	Veillonella sp[3]
		372	Virgibacillus proomii
		373	Weissella cibaria
		374	Weissella viridescens

## Sheet: Metagenomics_dominant (HC)
Metagenomics: dominant taxa in the HC group.
ASVs ID	Re-classified taxa in the EzBioCloud database
5bdd1eb354cc9af524e5494bd9c1e62f	Agathobaculum butyriciproducens
6824bf62659abdbcbe5638e74c210123	Alistipes onderdonkii
73ae8a803174a38b16764e75635ed44c	Alistipes putredinis
6ea5556045885d9f323dddba01dd7ffc	Anaerobutyricum spp.
f39f0eb9eaae81a0b9b4ca3e4043ff4a	Anaerobutyricum spp.
7b916b3fa749ecd9899e1b5cdf1bc4e3	Anaerostipes hadrus
bc803cd7f559a9415fbf8039204f413c	Anaerostipes hadrus
efd4fb2d1fa7328858c200fc2b764cde	Anaerostipes hadrus
40a4180b23337bc8167591487dbf99c1	Bacteroides cellulosilyticus
bbd75fa2cece8fa44bd57e3c585c0197	Bacteroides fragilis
afdfff879bf632677b455fc391325949	Bacteroides galacturonicus
8c4720b8415ea289298ead827c115aa1	Bacteroides thetaiotaomicron
3236b54344bc83cf0b0c15b6f7211361	Bacteroides uniformis
159871098ca16ec6d19aea367ffee488	Bacteroides vulgatus
82a938698291b68cecfcb9d46457229b	Bacteroides vulgatus
d3e60aa90187b4a7e6a787dd2865614e	Bifidobacterium spp.
ee860c7177c6aa5a6e337da1b1960a29	Bifidobacterium spp.
fab0f5719b1de03b332a3c59b2166610	Bifidobacterium spp.
ffeb435e0154a364df361ec06e478b36	Bifidobacterium spp.
e8d97a733d6c71ffb7e3231424bd110e	Blautia faecis
ebe9718731e4a76204873c355f54b032	Blautia massiliensis
111bb2b6a6ce5bfe3321f39d51b31dbb	Blautia obeum
6fa94e001df447c05f581285124706f2	Blautia spp.
7f03b2c8f50e54d015ddf07fa90c95fd	Blautia spp.
ccb9bfda98d58be53f2ea458cb6189a6	Clostridioides difficile
2c5d95f90ad6e4c178bb00e77cedc6ad	Clostridium leptum
57d8282b41ebbfe0a8a6e1a345fc6420	Clostridium spp.
e8b0140ee3e1d34d199387c06844c5a9	Clostridium spp.
83cd605349c479d69d7ca8652a406ef3	Collinsella aerofaciens
4b3e5b7569dfe538dfa8e5dc0d6363c4	Coprococcus catus
d9ad8f00ccbaff854da1f93fa5791c3f	Coprococcus comes
e3e8627c1004b7bc5a41b3808fb4fc03	Dorea longicatena
2335b80a59bbfb2b557d30ee813e9a36	Dorea spp.
acff9dc0356ef04e44da9dfff54e02ff	Dysosmobacter welbionis
46339038292cac3dd26b04122d4ccaad	Enterococcus spp.
7a5478452f84fc37376a3408bc310451	Escherichia-Shigella
141d0ecdfc6da9f32aae31dc923af4f9	Eubacterium ventriosum
12fb7c23276f4c4e440163ccdbb89b99	Faecalibacterium prausnitzii
689d03e9572c681bb9e11ce09f36e4bb	Faecalibacterium prausnitzii
6a5a62bc04f3235ee3b2110569e5c72c	Faecalibacterium prausnitzii
b9072242edca7525f17dfaf07abbb08e	Faecalibacterium prausnitzii
370f759efac337197ebf0de122f7d299	Fusicatenibacter saccharivorans
3a6f0b8e0883cbc6b9df3a53d3aa9711	Gemmiger formicilis
d245b4d411cd27ed798e7df1e7f835ea	Gemmiger spp.
0e1c921b3823369aa9761ebf77146ccf	Intestinimonas timonensis
6ffc1dc2d73e7c2fd266feb217ab4cd0	Lachnoclostridium spp.
26febd3e76c7c585cb8c12e55390c420	Lachnospira pectinoschiza
2e33878a9738292100492b3ada9a9b8b	Lachnospiraceae spp.
4eb63f7680ca8bf7ab63352b7061f6ae	Lachnospiraceae spp.
a675ec435194a3464899e5944332ae2b	Lachnospiraceae spp.
fe8ead2946324fd23605a7e82c52261a	Lachnospiraceae spp.
685bb8d50219067cab562a8c9d859c95	Oscillospiraceae spp.
f4b0d9a7df45f8f0682dbbb61e00792c	Oscillospiraceae spp.
003634bf8fcbec0e1b1b35d1232c490e	Parabacteroides merdae
526684125ab22e1e9142113872be2594	Romboutsia timonensis
6d2ecdd931f0774ca7ae5c6656a12272	Roseburia inulinivorans
8bd900b47876f5a9fba0cc4d1ab34c92	Ruminococcus faecis
b9d0c4301d566e2296a449935556741c	Ruminococcus spp.
278f28a185593f1ddf4e891f1ef6d1ac	Streptococcus vestibularis
619b904e86e50362dda7263d0a61d33d	Sutterella wadsworthensis
4e0832cbae1b053cf7e89171ed0db5bb	Waltera intestinalis

## Sheet: Metagenomics_dominant (UC)
Metagenomics: dominant taxa in the UC group.
ASVs ID	Re-classified taxa in the EzBioCloud database
5bdd1eb354cc9af524e5494bd9c1e62f	Agathobaculum butyriciproducens
6ea5556045885d9f323dddba01dd7ffc	Anaerobutyricum spp.
f39f0eb9eaae81a0b9b4ca3e4043ff4a	Anaerobutyricum spp.
efd4fb2d1fa7328858c200fc2b764cde	Anaerostipes hadrus
afdfff879bf632677b455fc391325949	Bacteroides galacturonicus
cc7fed157b2b985bce0c6482572f1d92	Bacteroides ovatus
8c4720b8415ea289298ead827c115aa1	Bacteroides thetaiotaomicron
fab0f5719b1de03b332a3c59b2166610	Bifidobacterium spp.
ffeb435e0154a364df361ec06e478b36	Bifidobacterium spp.
e8d97a733d6c71ffb7e3231424bd110e	Blautia faecis
ebe9718731e4a76204873c355f54b032	Blautia massiliensis
111bb2b6a6ce5bfe3321f39d51b31dbb	Blautia obeum
7f03b2c8f50e54d015ddf07fa90c95fd	Blautia spp.
965509aa60520d891204122ad189058f	Blautia spp.
ccb9bfda98d58be53f2ea458cb6189a6	Clostridioides difficile
c82e0211264675b33eb5d3cf4a7a2fd2	Clostridium innocuum
ee338bc6e817ab84513cbed96caaceda	Clostridium sporogenes
24b21ec0ee577804411206b5c119597e	Clostridium spp.
57d8282b41ebbfe0a8a6e1a345fc6420	Clostridium spp.
92d441b4b9f90f3af912c331f08d1612	Clostridium spp.
e8b0140ee3e1d34d199387c06844c5a9	Clostridium spp.
83cd605349c479d69d7ca8652a406ef3	Collinsella aerofaciens
4b3e5b7569dfe538dfa8e5dc0d6363c4	Coprococcus catus
d9ad8f00ccbaff854da1f93fa5791c3f	Coprococcus comes
e3e8627c1004b7bc5a41b3808fb4fc03	Dorea longicatena
2335b80a59bbfb2b557d30ee813e9a36	Dorea spp.
46339038292cac3dd26b04122d4ccaad	Enterococcus spp.
b6968483049e3a3666cf4c66a50856d6	Erysipelatoclostridium ramosum
7a5478452f84fc37376a3408bc310451	Escherichia-Shigella
570fb97d61f7afbf7b1be1d03da01c34	Eubacterium ramulus
141d0ecdfc6da9f32aae31dc923af4f9	Eubacterium ventriosum
12fb7c23276f4c4e440163ccdbb89b99	Faecalibacterium prausnitzii
689d03e9572c681bb9e11ce09f36e4bb	Faecalibacterium prausnitzii
6a5a62bc04f3235ee3b2110569e5c72c	Faecalibacterium prausnitzii
b9072242edca7525f17dfaf07abbb08e	Faecalibacterium prausnitzii
518c3c81adf4166bb40a1f978020a00a	Flavonifractor plautii
370f759efac337197ebf0de122f7d299	Fusicatenibacter saccharivorans
52242d857178c17a324dec506e1420d9	Haemophilus parainfluenzae
8d20206a68d0610a01800d6d9ce69cb1	Lachnospira eligens
4eb63f7680ca8bf7ab63352b7061f6ae	Lachnospira spp.
2e33878a9738292100492b3ada9a9b8b	Lachnospiraceae spp.
a675ec435194a3464899e5944332ae2b	Lachnospiraceae spp.
fe8ead2946324fd23605a7e82c52261a	Lachnospiraceae spp.
526684125ab22e1e9142113872be2594	Romboutsia timonensis
6d2ecdd931f0774ca7ae5c6656a12272	Roseburia inulinivorans
f9c6cd949afd27c1174931c65e9520be	Ruminococcus gnavus
2f794f662c618a022135907b3dd68321	Streptococcus pneumoniae
278f28a185593f1ddf4e891f1ef6d1ac	Streptococcus vestibularis
83107b567be9971943e9a205fbd961aa	Turicibacter sanguinis
d3949753eb43e712d324eb4e0be20ee4	Veillonella dispar

## Sheet: Metagenomics_dominant (CD)
Metagenomics: dominant taxa in the CD group.
ASVs ID	Re-classified taxa in the EzBioCloud database
bc803cd7f559a9415fbf8039204f413c	Anaerostipes hadrus
efd4fb2d1fa7328858c200fc2b764cde	Anaerostipes hadrus
bbd75fa2cece8fa44bd57e3c585c0197	Bacteroides fragilis
afdfff879bf632677b455fc391325949	Bacteroides galacturonicus
ffeb435e0154a364df361ec06e478b36	Bifidobacterium spp.
e8d97a733d6c71ffb7e3231424bd110e	Blautia faecis
7f03b2c8f50e54d015ddf07fa90c95fd	Blautia spp.
341892655c118c97607c7e2a2c6ad080	Blautia stercoris
ccb9bfda98d58be53f2ea458cb6189a6	Clostridioides difficile
c82e0211264675b33eb5d3cf4a7a2fd2	Clostridium innocuum
57d8282b41ebbfe0a8a6e1a345fc6420	Clostridium spp.
33423001e8bc6a2608bb5e2bb37d6a36	Enterocloster bolteae
b6968483049e3a3666cf4c66a50856d6	Erysipelatoclostridium ramosum
7a5478452f84fc37376a3408bc310451	Escherichia-Shigella
689d03e9572c681bb9e11ce09f36e4bb	Faecalibacterium prausnitzii
f8feba78c66fecba0f84d09ce29070a5	Faecalimonas umbilicata
518c3c81adf4166bb40a1f978020a00a	Flavonifractor plautii
370f759efac337197ebf0de122f7d299	Fusicatenibacter saccharivorans
8960f90719cb4143a22e69648be0d2d0	Lachnospiraceae spp.
526684125ab22e1e9142113872be2594	Romboutsia timonensis
f9c6cd949afd27c1174931c65e9520be	Ruminococcus gnavus
278f28a185593f1ddf4e891f1ef6d1ac	Streptococcus vestibularis

## Sheet: Culturomics_dominant (HC)
Culturomics: dominant taxa in the HC group.
Phylum	Species
Actinobacteriota	Bifidobacterium adolescentis
Actinobacteriota	Bifidobacterium bifidum
Actinobacteriota	Bifidobacterium catenulatum
Actinobacteriota	Bifidobacterium longum
Actinobacteriota	Bifidobacterium longum subsp. suillum
Actinobacteriota	Bifidobacterium pseudocatenulatum
Actinobacteriota	Collinsella aerofaciens
Actinobacteriota	Eggerthella lenta
Firmicutes	Bacillus cereus
Firmicutes	Clostridium butyricum
Firmicutes	Clostridium innocuum
Firmicutes	Clostridium lavalense
Firmicutes	Enterococcus casseliflavus
Firmicutes	Enterococcus faecalis
Firmicutes	Enterococcus faecium
Firmicutes	Enterococcus hirae
Firmicutes	Latilactobacillus sakei
Firmicutes	Streptococcus anginosus
Firmicutes	Streptococcus parasanguinis
Firmicutes	Streptococcus salivarius
Bacteroidota	Alistipes shahii
Bacteroidota	Bacteroides coprocola
Bacteroidota	Bacteroides fragilis
Bacteroidota	Bacteroides ovatus
Bacteroidota	Bacteroides thetaiotaomicron
Bacteroidota	Bacteroides uniformis
Bacteroidota	Bacteroides vulgatus
Bacteroidota	Parabacteroides distasonis
Bacteroidota	Parabacteroides merdae
Proteobacteria	Campylobacter ureolyticus
Proteobacteria	Citrobacter freundii
Proteobacteria	Escherichia coli
Proteobacteria	Klebsiella pneumoniae
Proteobacteria	Mesosutterella multiformis
Proteobacteria	Sutterella wadsworthensis

## Sheet: Culturomics_dominant (UC)
Culturomics: dominant taxa in the UC group.
Phylum	Species
Actinobacteriota	Bifidobacterium bifidum
Actinobacteriota	Bifidobacterium dentium
Actinobacteriota	Bifidobacterium longum
Actinobacteriota	Eggerthella lenta
Firmicutes	Clostridium aldenense
Firmicutes	Clostridium butyricum
Firmicutes	Clostridium innocuum
Firmicutes	Enterococcus avium
Firmicutes	Enterococcus casseliflavus
Firmicutes	Enterococcus faecalis
Firmicutes	Enterococcus faecium
Firmicutes	Enterococcus gallinarum
Firmicutes	Eubacterium limosum
Firmicutes	Flavonifractor plautii
Firmicutes	Lacticaseibacillus paracasei
Firmicutes	Lactococcus garvieae
Firmicutes	Lactococcus lactis
Firmicutes	Paraclostridium bifermentans
Firmicutes	Peptoniphilus gorbachii
Firmicutes	Streptococcus anginosus
Firmicutes	Streptococcus salivarius
Bacteroidota	Bacteroides fragilis
Bacteroidota	Bacteroides ovatus
Bacteroidota	Bacteroides thetaiotaomicron
Bacteroidota	Bacteroides uniformis
Bacteroidota	Bacteroides vulgatus
Bacteroidota	Parabacteroides distasonis
Bacteroidota	Parabacteroides merdae
Proteobacteria	Escherichia coli
Proteobacteria	Proteus mirabilis

## Sheet: Culturomics_dominant (CD)
Culturomics: dominant taxa in the CD group.
Phylum	Species
Actinobacteriota	Bifidobacterium dentium
Actinobacteriota	Bifidobacterium longum
Actinobacteriota	Eggerthella lenta
Firmicutes	Clostridium clostridioforme
Firmicutes	Clostridium innocuum
Firmicutes	Clostridium symbiosum
Firmicutes	Enterocloster bolteae
Firmicutes	Enterococcus avium
Firmicutes	Enterococcus casseliflavus
Firmicutes	Enterococcus faecalis
Firmicutes	Enterococcus faecium
Firmicutes	Enterococcus gallinarum
Firmicutes	Erysipelatoclostridium ramosum
Firmicutes	Flavonifractor plautii
Firmicutes	Hungatella effluvii
Firmicutes	Ruminococcus gnavus
Firmicutes	Veillonella parvula
Bacteroidota	Bacteroides fragilis
Bacteroidota	Bacteroides thetaiotaomicron
Proteobacteria	Escherichia coli
Proteobacteria	Klebsiella pneumoniae
Proteobacteria	Morganella morganii
