# Supplementary material for: Gut microbiota in inflammatory bowel disease: a combined culturomics and metagenomics perspective
Source: Research Square preprint supplement (doi:10.21203/rs.3.rs-3343885/v1), 2023-09-18

### Additional file 3

**Fig. S3. MDS and NMDS plots of  $\beta$ -diversity for microbial communities between the HC and CD groups. PERMDISP and PERMANOVA with adjusted  $p$ -value were calculated. **a**, MDS plot; **b**, NMDS plot.**

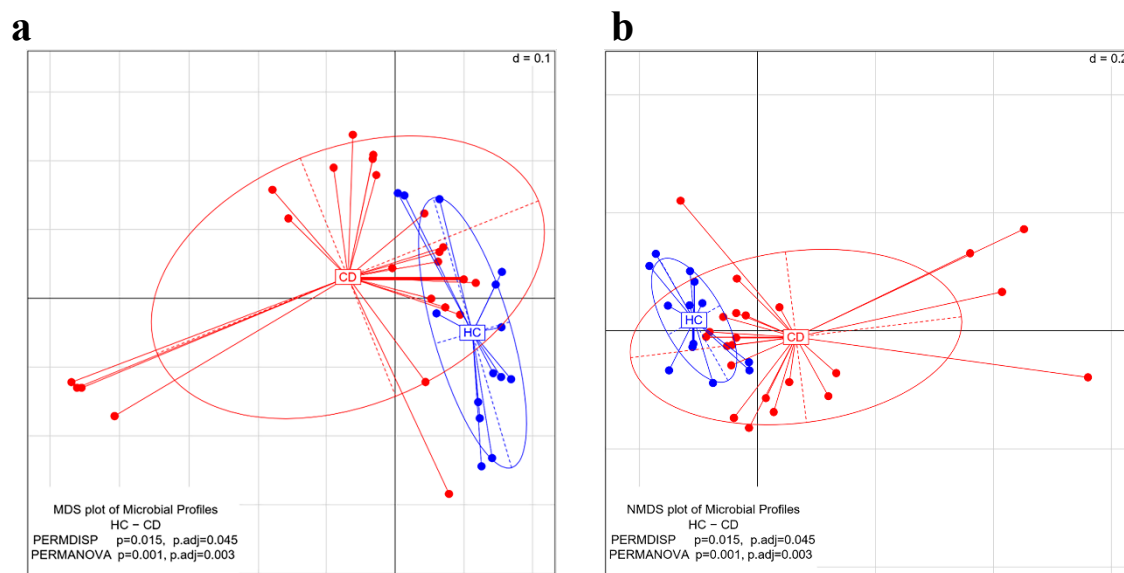

**Fig. S4. MDS and NMDS plots of  $\beta$ -diversity for microbial communities between the HC and UC groups. PERMDISP and PERMANOVA with adjusted  $p$ -value were calculated. **a**, MDS plot; **b**, NMDS plot.**

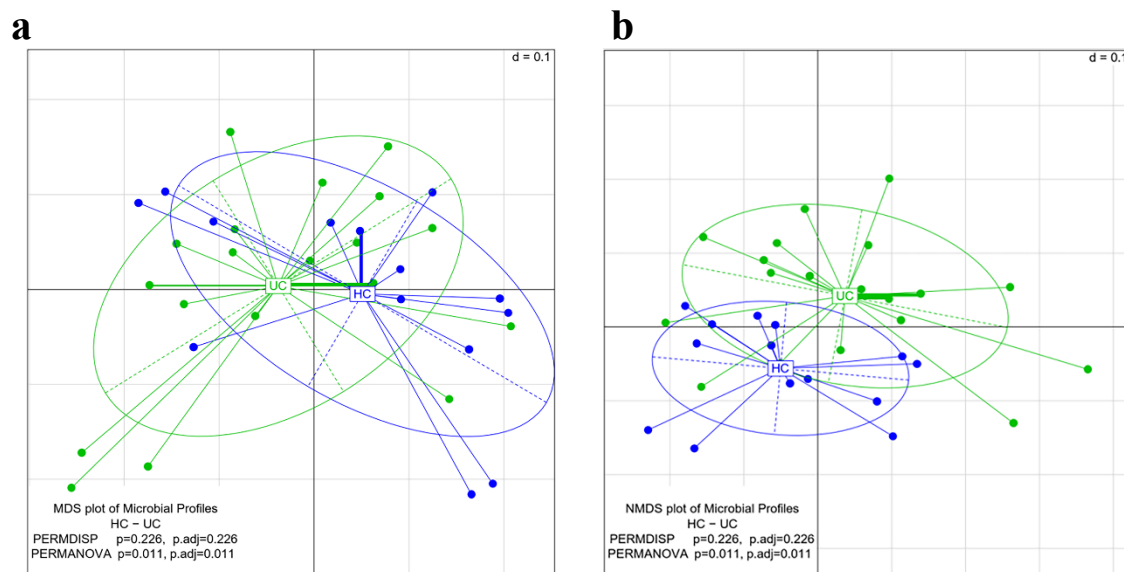

Supplement: Supplementary file 3 [file 89e2d7d7488a0c3548f740a8.pdf]
