# Supplementary material for: Gut microbiota in inflammatory bowel disease: a combined culturomics and metagenomics perspective
Source: Research Square preprint supplement (doi:10.21203/rs.3.rs-3343885/v1), 2023-09-18
Supplement: Supplementary file 3 [file 7808068cb539eb7273602869.xlsx]

## Sheet: LEfSe (UC vs. HC)
LEfSe result1 (UC vs. HC)
	feature	enrich_group	ef_lda	pvalue	padj
marker1	g__Fusicatenibacter_s__uncultured_organism	HC	4.30166	0.0308303	0.0308303
marker2	s__Collinsella_aerofaciens	HC	4.27828	0.00124239	0.00124239
marker3	s__Parabacteroides_merdae	HC	3.96123	0.0131109	0.0131109
marker4	s__Alistipes_putredinis	HC	3.81865	0.0322682	0.0322682
marker5	s__human_intestinal	HC	3.7204	0.0171033	0.0171033
marker6	s__Ruminococcus_callidus	HC	3.6682	0.0142228	0.0142228
marker7	s__[Clostridium]_leptum	HC	3.64338	0.00256812	0.00256812
marker8	g__[Eubacterium]_ruminantium_group_s__gut_metagenome	HC	3.60271	0.011402	0.011402
marker9	s__Prevotella_sp.	HC	3.47456	0.00555727	0.00555727
marker10	s__Bacteroides_cellulosilyticus	HC	3.40778	0.00510903	0.00510903
marker11	s__Akkermansia_sp.	HC	3.31044	0.0374201	0.0374201
marker12	s__Odoribacter_splanchnicus	HC	3.21269	0.00417196	0.00417196
marker13	g__Christensenellaceae_R-7_group_s__uncultured_Lachnospiraceae	HC	3.07029	0.0316096	0.0316096
marker14	f__Ruminococcaceae_g__uncultured_s__gut_metagenome	HC	3.05778	0.00555727	0.00555727
marker15	s__Burkholderia_sp.	HC	3.04966	0.0233284	0.0233284
marker16	g__Tyzzerella_s__unidentified	HC	3.02005	0.025869	0.025869
marker17	g__[Eubacterium]_coprostanoligenes_group_s__unidentified	HC	2.99363	0.0374201	0.0374201
marker18	s__Intestinimonas_timonensis	HC	2.95259	0.00682636	0.00682636
marker19	s__Bilophila_wadsworthia	HC	2.83616	0.0239864	0.0239864
marker20	s__uncultured_UCG-005	HC	2.83211	0.027951	0.027951
marker21	s__Parabacteroides_goldsteinii	HC	2.77833	0.0374201	0.0374201
marker22	s__Massiliomicrobiota_timonensis	HC	2.70698	0.00970039	0.00970039
marker23	s__Bacteroides_intestinalis	HC	2.68201	0.0374201	0.0374201
marker24	s__Alistipes_indistinctus	HC	2.64707	0.048815	0.048815
marker25	g__Christensenellaceae_R-7_group_s__human_gut	HC	2.58329	0.00459672	0.00459672
marker26	s__uncultured_Lachnospiraceae_UCG-001	HC	2.55741	0.0374201	0.0374201
marker27	g__Adlercreutzia_s__uncultured_bacterium	HC	2.48589	0.00877595	0.00877595
marker28	g__UCG-005_s__human_gut	HC	2.43988	0.0303175	0.0303175
marker29	s__uncultured_Erysipelatoclostridiaceae	HC	2.37825	0.0264144	0.0264144
marker30	s__Ruthenibacterium_lactatiformans	HC	2.36682	0.0104278	0.0104278
marker31	f__Coriobacteriales_Incertae_Sedis_g__uncultured_s__gut_metagenome	HC	2.3335	0.0108549	0.0108549
marker32	g__Lachnospiraceae_UCG-003_s__gut_metagenome	HC	2.26406	0.0374201	0.0374201
marker33	g__Angelakisella_s__uncultured_bacterium	HC	2.25439	0.00227604	0.00227604
marker34	s__uncultured_Incertae_Sedis	HC	2.01377	0.0374201	0.0374201
marker35	s__uncultured_Faecalibacterium	UC	4.52804	0.0378042	0.0378042
marker36	s__uncultured_Pasteurellaceae	UC	3.81337	0.0231027	0.0231027
marker37	g__Sellimonas_s__uncultured_bacterium	UC	3.75948	0.0231027	0.0231027
marker38	s__Clostridioides_difficile	UC	3.68979	0.00754858	0.00754858
marker39	g__Lachnospiraceae_UCG-004_s__uncultured_Clostridium	UC	3.23652	0.0196125	0.0196125
marker40	s__Bifidobacterium_dentium	UC	3.20045	0.00667662	0.00667662
marker41	s__Dickeya_phage	UC	3.03173	0.015607	0.015607
marker42	s__Butyricicoccus_pullicaecorum	UC	2.84935	0.0410395	0.0410395
marker43	s__bacterium_NLAE-zl-G490	UC	2.69263	0.0229532	0.0229532
marker44	s__Clostridium_paraputrificum	UC	2.39414	0.0410395	0.0410395

## Sheet: LEfSe (CD vs. HC)
LEfSe result2 (CD vs. HC)
	feature	enrich_group	ef_lda	pvalue	padj
marker1	s__uncultured_Enterobacterales	CD	4.80531	0.00171648	0.00171648
marker2	s__uncultured_[Ruminococcus]_gnavus_group	CD	4.62516	0.000898738	0.000898738
marker3	s__Faecalimonas_umbilicata	CD	4.13935	0.00377979	0.00377979
marker4	s__uncultured_Lachnoclostridium	CD	3.97642	0.0147551	0.0147551
marker5	s__uncultured_[Clostridium]_innocuum_group	CD	3.92477	0.0103151	0.0103151
marker6	s__bacterium_NLAE-zl-G490	CD	3.84308	0.00878153	0.00878153
marker7	s__Parasutterella_excrementihominis	CD	3.52884	0.00963325	0.00963325
marker8	s__Bifidobacterium_dentium	CD	3.43261	0.0247629	0.0247629
marker9	s__Bacteroides_sp.	CD	3.41381	0.0110207	0.0110207
marker10	s__Clostridium_paraputrificum	CD	3.30062	0.0404591	0.0404591
marker11	s__Odoribacter_splanchnicus	CD	3.28841	0.0185539	0.0185539
marker12	s__bacterium_NLAE-zl-G121	CD	2.91124	0.0318625	0.0318625
marker13	g__Lachnospiraceae_NK4A136_group_s__gut_metagenome	CD	2.81425	0.0195522	0.0195522
marker14	g__Bifidobacterium_s__human_gut	HC	4.39025	0.0110251	0.0110251
marker15	s__Bacteroides_coprocola	HC	4.32429	0.00256479	0.00256479
marker16	s__uncultured_Bifidobacterium	HC	4.29678	0.00523095	0.00523095
marker17	s__Collinsella_aerofaciens	HC	4.11143	0.013058	0.013058
marker18	s__Parabacteroides_merdae	HC	4.03052	0.00111967	0.00111967
marker19	s__Bacteroides_uniformis	HC	3.98904	0.0374383	0.0374383
marker20	s__Ruminococcus_faecis	HC	3.92548	0.0330443	0.0330443
marker21	s__Ruminococcus_bicirculans	HC	3.91296	0.00904667	0.00904667
marker22	s__Alistipes_putredinis	HC	3.87784	1.49e-05	1.49e-05
marker23	s__Roseburia_inulinivorans	HC	3.87153	0.00162312	0.00162312
marker24	s__Roseburia_hominis	HC	3.86443	0.00431992	0.00431992
marker25	s__uncultured_Agathobacter	HC	3.85513	0.0317539	0.0317539
marker26	s__human_intestinal	HC	3.82522	0.0109737	0.0109737
marker27	s__Ruminococcus_callidus	HC	3.73253	0.00102551	0.00102551
marker28	g__Prevotella_9_s__gut_metagenome	HC	3.72785	0.0224903	0.0224903
marker29	g__Alloprevotella_s__Prevotellaceae_bacterium	HC	3.70124	0.0224903	0.0224903
marker30	s__[Clostridium]_leptum	HC	3.64765	0.0153256	0.0153256
marker31	g__[Eubacterium]_ruminantium_group_s__gut_metagenome	HC	3.6302	0.000225715	0.000225715
marker32	s__uncultured_Blautia	HC	3.57004	0.0223266	0.0223266
marker33	s__Trichuris_trichiura	HC	3.53588	0.0370949	0.0370949
marker34	s__Bacteroides_cellulosilyticus	HC	3.52828	1.67e-05	1.67e-05
marker35	s__Alistipes_finegoldii	HC	3.51265	0.00131377	0.00131377
marker36	g__Subdoligranulum_s__metagenome	HC	3.50436	0.0087365	0.0087365
marker37	s__Blautia_faecis	HC	3.49114	0.0234461	0.0234461
marker38	g__Paraprevotella_s__metagenome	HC	3.48871	0.011184	0.011184
marker39	s__Paraprevotella_clara	HC	3.47868	0.011184	0.011184
marker40	g__Lachnospiraceae_NK4A136_group_s__human_gut	HC	3.41214	0.00322453	0.00322453
marker41	s__Prevotella_sp.	HC	3.39799	0.00244801	0.00244801
marker42	s__Carnobacterium_sp.	HC	3.39216	0.00632978	0.00632978
marker43	g__UCG-002_s__gut_metagenome	HC	3.38661	0.0052758	0.0052758
marker44	g__Coprococcus_s__metagenome	HC	3.36375	8.14e-06	8.14e-06
marker45	s__Coprococcus_comes	HC	3.34294	0.0423091	0.0423091
marker46	s__uncultured_Spirochaetales	HC	3.32972	0.0224903	0.0224903
marker47	g__[Ruminococcus]_gauvreauii_group_s__uncultured_Clostridiales	HC	3.26263	0.0259425	0.0259425
marker48	g__[Eubacterium]_coprostanoligenes_group_s__gut_metagenome	HC	3.15492	0.0265865	0.0265865
marker49	s__Bacteroidales_bacterium	HC	3.09368	0.0224903	0.0224903
marker50	f__Ruminococcaceae_g__uncultured_s__gut_metagenome	HC	3.07689	0.00244801	0.00244801
marker51	s__[Eubacterium]_siraeum	HC	3.07525	0.0191936	0.0191936
marker52	g__Subdoligranulum_s__uncultured_rumen	HC	3.07335	0.0274891	0.0274891
marker53	s__uncultured_UCG-003	HC	3.00893	0.00178856	0.00178856
marker54	s__uncultured_UCG-005	HC	3.00724	0.00025077	0.00025077
marker55	s__uncultured_Acetivibrio	HC	2.99325	0.0224903	0.0224903
marker56	s__uncultured_Butyricimonas	HC	2.9602	0.011184	0.011184
marker57	g__Christensenellaceae_R-7_group_s__uncultured_Lachnospiraceae	HC	2.94318	0.000225715	0.000225715
marker58	s__uncultured_UCG-002	HC	2.92708	0.00943258	0.00943258
marker59	f__Coriobacteriales_Incertae_Sedis_g__uncultured_s__uncultured_organism	HC	2.84028	0.00244801	0.00244801
marker60	s__Intestinimonas_timonensis	HC	2.83718	0.0162952	0.0162952
marker61	s__uncultured_Alistipes	HC	2.79652	0.00754002	0.00754002
marker62	s__Parabacteroides_goldsteinii	HC	2.78535	0.0224903	0.0224903
marker63	s__Alistipes_indistinctus	HC	2.77342	0.000225715	0.000225715
marker64	s__uncultured_Oscillospiraceae	HC	2.71304	0.00350933	0.00350933
marker65	g__Christensenellaceae_R-7_group_s__uncultured_prokaryote	HC	2.70497	0.00336351	0.00336351
marker66	g__Christensenellaceae_R-7_group_s__human_gut	HC	2.68843	0.000248412	0.000248412
marker67	s__Bacteroides_intestinalis	HC	2.67695	0.0224903	0.0224903
marker68	g__Lachnospiraceae_UCG-001_s__Lachnospiraceae_bacterium	HC	2.65008	0.0116722	0.0116722
marker69	s__uncultured_Christensenellaceae_R-7_group	HC	2.593	0.00336406	0.00336406
marker70	s__uncultured_Lachnospiraceae_UCG-001	HC	2.58036	0.0224903	0.0224903
marker71	s__bacterium_YE57	HC	2.5556	0.00754002	0.00754002
marker72	g__Roseburia_s__gut_metagenome	HC	2.53714	0.00244801	0.00244801
marker73	f__Lachnospiraceae_g__uncultured_s__uncultured_Eubacterium	HC	2.49954	0.00970191	0.00970191
marker74	s__Butyricimonas_paravirosa	HC	2.48505	0.00754002	0.00754002
marker75	g__Adlercreutzia_s__uncultured_bacterium	HC	2.46841	0.000754024	0.000754024
marker76	g__UCG-005_s__human_gut	HC	2.46127	0.00244801	0.00244801
marker77	g__Moryella_s__human_gut	HC	2.37391	0.00110988	0.00110988
marker78	g__Family_XIII_AD3011_group_s__uncultured_Eubacterium	HC	2.37375	0.0317539	0.0317539
marker79	f__Coriobacteriales_Incertae_Sedis_g__uncultured_s__gut_metagenome	HC	2.3547	0.000761933	0.000761933
marker80	g__Marvinbryantia_s__uncultured_Clostridium	HC	2.32061	0.00754002	0.00754002
marker81	g__Lachnospiraceae_UCG-008_s__metagenome	HC	2.30313	0.010526	0.010526
marker82	g__Lachnospiraceae_UCG-003_s__gut_metagenome	HC	2.29471	0.0224903	0.0224903
marker83	g__Angelakisella_s__uncultured_bacterium	HC	2.25056	0.00110988	0.00110988
marker84	g__GCA-900066575_s__uncultured_Clostridium	HC	2.23223	0.0177519	0.0177519
marker85	g__UCG-010_s__metagenome	HC	2.21024	0.00754002	0.00754002
marker86	s__uncultured_Clostridia	HC	2.17436	0.0483465	0.0483465
marker87	g__UCG-003_s__metagenome	HC	2.14181	0.0265865	0.0265865
marker88	s__uncultured_Colidextribacter	HC	2.12173	0.0087365	0.0087365
marker89	g__Lachnospiraceae_FCS020_group_s__metagenome	HC	2.00319	0.0224903	0.0224903

## Sheet: DESeq2 (UC vs. HC)
DESeq2 result 1 (UC vs. HC)
Feature ID	Species	log2FoldChange	lfcSE	stat	pvalue	padj	Identification in EzBioCloud 16s rRNA gene database (similarity %)
1d2cfc101031c114a72fefb80df10fa9	s__Bacteroides_uniformis	22.4979	2.97013	7.57471	3.59921e-14	2.07854e-12	Bacteroides uniformis (99.54%)
22b2f11e0df60bff9fcd4227a05f4724	s__uncultured_Lachnospiraceae	22.6933	2.97006	7.64068	2.16071e-14	1.42607e-12	Kineothrix spp. (97.58%)
386ba9ff3c16b7fde9e7d8e23567a356	s__Bacteroides_plebeius	12.0004	2.47201	4.85451	1.20685e-06	5.57564e-05	Phocaeicola plebeius (100%)
a7203b82408c8b784897e79caf30731d	s__Holdemanella_biformis	21.8071	2.97051	7.3412	2.11689e-13	1.08667e-11	Holdemanella biformis (100%)
2c5d95f90ad6e4c178bb00e77cedc6ad	s__[Clostridium]_leptum	-7.11994	1.79536	-3.96574	7.31693e-05	0.00307311	Clostridium leptum (100%)
63da2c694df640c49fb0f67025744c35	s__Ruminococcus_bicirculans	-24.7836	2.95712	-8.381	5.24805e-17	8.08199e-15	Ruminococcus bicirculans (99.76%)
80b46ead67b1042e7c4dab5f9bec1333	s__gut_metagenome	-24.3807	2.95737	-8.24405	1.66472e-16	1.5382e-14	Oscillospiraceae spp. (92.49%)
85babc48a71b9f5fa9b3d24825ab81ea	s__uncultured_Prevotella_9	-25.0112	2.957	-8.45828	2.71351e-17	6.2682e-15	Prevotella spp. (97.92%)
d79e75079e3dc1c551b264a82d505a47	s__uncultured_Prevotella_9	-24.5567	2.95684	-8.30504	9.97862e-17	1.15253e-14	Prevotella copri (99.54%)
d83980b53114562285a089b5f41077f9	s__unidentified	-24.1273	2.9576	-8.15774	3.4134e-16	2.62831e-14	Coprococcus spp. (97.83%)
f6b6f510ed89864d990def23098e0a26	s__Prevotella_sp.	-25.8897	2.76946	-9.34829	8.90757e-21	4.1153e-18	Prevotella spp. (96.54%)

## Sheet: DESeq2 (CD vs. HC)
DESeq2 result 2 (CD vs. HC)
Feature ID	Species	log2FoldChange	lfcSE	stat	pvalue	padj	Identification in EzBioCloud 16s rRNA gene database (similarity %)
b9da546cbe27a76c8b984be29a6f9b5e	s__uncultured_Enterobacterales	24.2682	2.37046	10.2378	1.34282e-24	1.39654e-22	Escherichia-Shigella (unclassified)
bcb894e40eb5e80f6ac802e02e8dde99	s__Megamonas_funiformis	23.1159	3.02477	7.6422	2.13536e-14	3.17253e-13	Megamonas spp. (98.41%)
ad7fcf4c77013cefd1b80baa53bdee09	s__bacterium_NLAE-zl-G490	22.7771	2.5598	8.89801	5.6855e-19	2.36517e-17	Clostridium perfringens (100%)
dfa727423175693eea1be13e6e59a3d6	s__uncultured_Prevotella_9	21.4201	3.02535	7.08021	1.43931e-12	1.99585e-11	Prevotella spp. (98.38%)
82dd46f192e61a42d3450f45f11e7e15	s__Dickeya_phage	19.4516	3.02578	6.42862	1.28772e-10	1.67403e-09	Klebsiella spp. (unclassified)
7a5478452f84fc37376a3408bc310451	s__uncultured_Enterobacterales	4.86828	0.899295	5.41344	6.18239e-08	7.56434e-07	Escherichia-Shigella (unclassified)
05a1e3367c71c3a4f5b4d0301806b8d0	s__Bacteroides_plebeius	-8.12339	2.67088	-3.04146	0.00235432	0.0244849	Bacteroides plebeius (99.54%)
40a4180b23337bc8167591487dbf99c1	s__Bacteroides_cellulosilyticus	-9.06929	1.89995	-4.77344	1.81105e-06	1.98262e-05	Bacteroides cellulosilyticus (100%)
9d844ca34620a28e4a30030f90a8470d	s__Bacteroides_coprocola	-11.3096	2.33088	-4.85208	1.22175e-06	1.4118e-05	Bacteroides coprocola (100%)
63da2c694df640c49fb0f67025744c35	s__Ruminococcus_bicirculans	-23.0009	3.00683	-7.64954	2.01693e-14	3.17253e-13	Ruminococcus bicirculans (99.76%)
d83980b53114562285a089b5f41077f9	s__unidentified	-23.5894	3.00619	-7.84692	4.26364e-15	7.3903e-14	Coprococcus spp. (97.83%)
80b46ead67b1042e7c4dab5f9bec1333	s__gut_metagenome	-23.8463	3.00599	-7.93293	2.14039e-15	4.04727e-14	Oscillospiraceae spp. (92.49%)
1f637d7da0fd68d7d99987fe91819487	s__Megamonas_funiformis	-24.5308	3.00559	-8.16172	3.30274e-16	6.86969e-15	Megamonas funiformis (99.09%)
d79e75079e3dc1c551b264a82d505a47	s__uncultured_Prevotella_9	-24.5565	3.00545	-8.17064	3.06768e-16	6.86969e-15	Prevotella copri (99.54%)
f8b7c34627da1e7ee87f7503f8869f52	s__metagenome	-25.1457	3.00528	-8.36718	5.90138e-17	1.53436e-15	Paraprevotella spp. (97.69%)
f6a289f263ba26e1f8698f0aaed08863	s__uncultured_Ligilactobacillus	-25.2392	3.00535	-8.39811	4.53721e-17	1.3482e-15	Ligilactobacillus ruminis (99.77%)
f6b6f510ed89864d990def23098e0a26	s__Prevotella_sp.	-25.3805	2.76744	-9.17113	4.68083e-20	2.43403e-18	Prevotella spp. (96.54%)
5964600a470193c51c5756854d4fb263	s__Paraprevotella_clara	-25.5022	2.77843	-9.17862	4.36631e-20	2.43403e-18	Paraprevotella clara (98.85%)
d1e93ac7225c3c336de568bc8e48d666	s__Trichuris_trichiura	-25.5437	3.00527	-8.49963	1.90199e-17	6.59357e-16	Oscillospiraceae spp. (93.99%)
da56c1fb7f6a1bc59cc722ced5232101	s__gut_metagenome	-26.262	2.11349	-12.4259	1.89095e-35	3.93318e-33	Eubacterium spp. (97.58%)
