# Supplementary material for: Gut microbiota in inflammatory bowel disease: a combined culturomics and metagenomics perspective
Source: Research Square preprint supplement (doi:10.21203/rs.3.rs-3343885/v1), 2023-09-18
Supplement: Supplementary file 4 [file fc418b98ef00a0a8c0b69a91.xlsx]

## Sheet: UC vs. HC
ANOVA-like differential expression (ALDEx2) compositional analysis between the UC and HC groups.
	KO	rab.all	rab.win.HC	rab.win.UC	diff.btw	diff.win	effect	overlap	we.ep	we.eBH	wi.ep	wi.eBH	description
1	K00001	4.44323	4.86027	4.32078	-0.172561	1.16724	-0.164829	0.425429	0.415905	0.536493	0.495166	0.60804	E1.1.1.1, adh; alcohol dehydrogenase [EC:1.1.1.1]
2	K00002	-7.83292	-8.17817	-7.3536	1.1315	6.96353	0.138155	0.438732	0.573904	0.661647	0.600413	0.683841	AKR1A1, adh; alcohol dehydrogenase (NADP+) [EC:1.1.1.2]
3	K00003	6.08096	6.31356	5.68541	-0.737275	0.829823	-0.823074	0.204513	0.00183099	0.0173533	0.00306798	0.025454	E1.1.1.3; homoserine dehydrogenase [EC:1.1.1.3]
4	K00004	-1.87489	-2.0565	-1.72171	0.0596495	1.95551	0.0285513	0.485861	0.904258	0.935133	0.857319	0.901581	BDH, butB; (R,R)-butanediol dehydrogenase / meso-butanediol dehydrogenase / diacetyl reductase [EC:1.1.1.4 1.1.1.- 1.1.1.303]
5	K00005	4.861	5.31733	4.37631	-0.890904	0.922341	-0.968601	0.136857	0.000145183	0.0173517	0.000197447	0.017775	gldA; glycerol dehydrogenase [EC:1.1.1.6]
6	K00007	-9.4531	-9.48994	-9.42734	0.308535	5.04913	0.0529513	0.470571	0.57328	0.658386	0.611419	0.689573	dalD; D-arabinitol 4-dehydrogenase [EC:1.1.1.11]
7	K00008	5.55397	5.94862	5.17384	-0.728613	0.82524	-0.867268	0.186518	0.0014786	0.017353	0.00165576	0.0226079	SORD, gutB; L-iditol 2-dehydrogenase [EC:1.1.1.14]
8	K00009	3.94294	4.00634	3.67614	-0.909869	1.48694	-0.574121	0.291714	0.0151783	0.0467724	0.0449162	0.0942161	mtlD; mannitol-1-phosphate 5-dehydrogenase [EC:1.1.1.17]
9	K00010	2.79785	3.77929	2.64728	-0.932646	1.43547	-0.584013	0.297143	0.0373081	0.0876347	0.0486012	0.0994331	iolG; myo-inositol 2-dehydrogenase / D-chiro-inositol 1-dehydrogenase [EC:1.1.1.18 1.1.1.369]
10	K00012	6.01842	6.33351	5.70573	-0.658281	0.969497	-0.656759	0.229649	0.00499807	0.0225758	0.00882749	0.0351298	UGDH, ugd; UDPglucose 6-dehydrogenase [EC:1.1.1.22]
11	K00013	6.14084	6.2915	5.77133	-0.689837	0.881663	-0.775013	0.199657	0.00158559	0.017353	0.0028537	0.0252337	hisD; histidinol dehydrogenase [EC:1.1.1.23]
12	K00014	6.49428	6.828	6.28355	-0.688109	0.827672	-0.836869	0.184857	0.000736167	0.0173522	0.00138349	0.0215211	aroE; shikimate dehydrogenase [EC:1.1.1.25]
13	K00015	-2.41399	-3.25717	-1.65106	1.51263	5.14932	0.255868	0.352756	0.33422	0.443945	0.167521	0.258689	gyaR, GOR1; glyoxylate reductase [EC:1.1.1.26]
14	K00016	6.09273	6.35118	5.73342	-0.643246	0.879526	-0.690827	0.239646	0.00644682	0.0265312	0.0106544	0.0392854	LDH, ldh; L-lactate dehydrogenase [EC:1.1.1.27]
15	K00018	5.56755	5.75886	5.22422	-0.538715	0.80827	-0.628011	0.259143	0.0116892	0.0392416	0.0177309	0.0538311	hprA; glycerate dehydrogenase [EC:1.1.1.29]
16	K00019	-8.26055	-9.12388	-6.7688	2.36729	5.4962	0.385839	0.339143	0.178399	0.257216	0.149464	0.22514	E1.1.1.30, bdh; 3-hydroxybutyrate dehydrogenase [EC:1.1.1.30]
17	K00020	4.18046	4.51429	3.98929	-0.577533	0.983311	-0.518478	0.272494	0.067145	0.13188	0.0269448	0.0687347	mmsB, HIBADH; 3-hydroxyisobutyrate dehydrogenase [EC:1.1.1.31]
18	K00023	-10.1682	-10.0884	-10.215	0.0394159	5.01273	0.00714288	0.495714	0.5245	0.611929	0.544561	0.626893	phbB; acetoacetyl-CoA reductase [EC:1.1.1.36]
19	K00024	4.81444	5.34151	4.66056	-0.708866	1.28642	-0.549544	0.268857	0.0122494	0.0405175	0.0260103	0.0674246	mdh; malate dehydrogenase [EC:1.1.1.37]
20	K00027	5.47489	5.80527	5.25714	-0.60481	0.750238	-0.69715	0.223079	0.0136058	0.0434461	0.00576887	0.0288807	ME2, sfcA, maeA; malate dehydrogenase (oxaloacetate-decarboxylating) [EC:1.1.1.38]
21	K00029	4.15372	4.55882	4.02413	-0.487156	1.11233	-0.379762	0.319623	0.0336322	0.0817154	0.0876497	0.154551	E1.1.1.40, maeB; malate dehydrogenase (oxaloacetate-decarboxylating)(NADP+) [EC:1.1.1.40]
22	K00030	2.02282	2.42583	1.91617	-0.501138	1.81175	-0.223572	0.389889	0.203878	0.307554	0.309034	0.420172	IDH3; isocitrate dehydrogenase (NAD+) [EC:1.1.1.41]
23	K00031	6.00152	6.11227	5.5561	-0.632144	0.876715	-0.751632	0.205429	0.00129529	0.0173525	0.00315646	0.0255685	IDH1, IDH2, icd; isocitrate dehydrogenase [EC:1.1.1.42]
24	K00033	4.55342	5.04714	4.26126	-0.713728	1.1583	-0.606675	0.256571	0.010963	0.0376476	0.0181329	0.0545855	PGD, gnd, gntZ; 6-phosphogluconate dehydrogenase [EC:1.1.1.44 1.1.1.343]
25	K00034	-1.67713	-1.49978	-1.84334	-0.163274	2.84944	-0.0507311	0.466438	0.912877	0.941273	0.813639	0.870723	gdh; glucose 1-dehydrogenase [EC:1.1.1.47]
26	K00036	4.26907	4.58546	4.17166	-0.783974	1.15754	-0.608854	0.264571	0.00803639	0.0307481	0.0199925	0.0577385	G6PD, zwf; glucose-6-phosphate 1-dehydrogenase [EC:1.1.1.49 1.1.1.363]
27	K00039	-9.63314	-9.55823	-9.69138	-0.0040386	5.00185	-0.00114279	0.499714	0.558916	0.644799	0.574461	0.655693	rbtD; ribitol 2-dehydrogenase [EC:1.1.1.56]
28	K00040	3.75154	4.04047	3.35279	-0.718629	0.817904	-0.840566	0.172237	0.000844365	0.0173524	0.000959722	0.0195622	uxuB; fructuronate reductase [EC:1.1.1.57]
29	K00041	4.25448	4.92034	4.12466	-0.798276	1.00695	-0.764534	0.228221	0.00247757	0.017378	0.0070918	0.0314355	uxaB; tagaturonate reductase [EC:1.1.1.58]
30	K00042	4.2212	4.43564	4.10509	-0.389128	0.927784	-0.41322	0.325429	0.0859572	0.157765	0.0931908	0.162076	garR, glxR; 2-hydroxy-3-oxopropionate reductase [EC:1.1.1.60]
31	K00045	-0.845854	-0.597257	-1.05688	-0.435653	2.33797	-0.144823	0.413714	0.399401	0.518987	0.445461	0.558367	E1.1.1.67, mtlK; mannitol 2-dehydrogenase [EC:1.1.1.67]
32	K00046	4.9928	5.35523	4.59657	-0.585471	0.886881	-0.630827	0.234504	0.00409696	0.0202342	0.00934218	0.0362838	idnO; gluconate 5-dehydrogenase [EC:1.1.1.69]
33	K00048	5.73424	5.95955	5.42138	-0.576618	0.907781	-0.641132	0.257143	0.0059817	0.0252746	0.0205421	0.0587627	fucO; lactaldehyde reductase [EC:1.1.1.77]
34	K00050	3.19347	3.43582	2.83083	-0.249454	1.5437	-0.141429	0.427306	0.755553	0.828691	0.507166	0.619106	ttuD; hydroxypyruvate reductase [EC:1.1.1.81]
35	K00052	6.10007	6.2946	5.85221	-0.635276	0.864688	-0.754772	0.196	0.0016546	0.017353	0.00289683	0.0253091	leuB, IMDH; 3-isopropylmalate dehydrogenase [EC:1.1.1.85]
36	K00053	6.25115	6.44436	6.01516	-0.628525	0.860389	-0.749299	0.199372	0.00133789	0.0173527	0.00239751	0.0245536	ilvC; ketol-acid reductoisomerase [EC:1.1.1.86]
37	K00054	-0.163119	-0.25596	0.0871869	0.249858	2.58469	0.09837	0.454727	0.58064	0.68804	0.683878	0.771349	mvaA; hydroxymethylglutaryl-CoA reductase [EC:1.1.1.88]
38	K00055	-4.61898	-4.90133	-2.38795	0.265317	6.42356	0.0324956	0.487861	0.745931	0.81472	0.884824	0.92157	E1.1.1.90; aryl-alcohol dehydrogenase [EC:1.1.1.90]
39	K00057	6.25354	6.42439	5.88952	-0.631927	0.830962	-0.789834	0.191945	0.00111673	0.0173525	0.00198412	0.0236479	gpsA; glycerol-3-phosphate dehydrogenase (NAD(P)+) [EC:1.1.1.94]
40	K00058	6.678	6.89273	6.31405	-0.650705	0.81838	-0.754644	0.198286	0.00216599	0.0173544	0.00255931	0.0247807	serA, PHGDH; D-3-phosphoglycerate dehydrogenase / 2-oxoglutarate reductase [EC:1.1.1.95 1.1.1.399]
41	K00059	7.50734	7.74321	7.20335	-0.59466	0.85538	-0.680166	0.231714	0.00439506	0.0209918	0.00914968	0.0357669	fabG; 3-oxoacyl-[acyl-carrier protein] reductase [EC:1.1.1.100]
42	K00060	1.57076	1.78752	1.14134	-0.679808	0.861675	-0.709827	0.227364	0.00657489	0.0268082	0.007055	0.031543	tdh; threonine 3-dehydrogenase [EC:1.1.1.103]
43	K00065	1.87971	2.047	1.37369	-0.511268	1.61119	-0.296044	0.397315	0.218172	0.324256	0.339453	0.452187	kduD; 2-dehydro-3-deoxy-D-gluconate 5-dehydrogenase [EC:1.1.1.127]
44	K00066	-7.70805	-6.9466	-8.49005	-1.6494	9.25117	-0.175426	0.414167	0.427798	0.529955	0.40734	0.505684	algD; GDP-mannose 6-dehydrogenase [EC:1.1.1.132]
45	K00067	6.20221	6.50145	5.92684	-0.618173	0.916549	-0.638415	0.2485	0.00878065	0.032644	0.0132564	0.0449807	rfbD, rmlD; dTDP-4-dehydrorhamnose reductase [EC:1.1.1.133]
46	K00068	2.72092	3.46167	2.20223	-1.09	1.55277	-0.708988	0.208797	0.0025693	0.0174423	0.00410118	0.026675	srlD; sorbitol-6-phosphate 2-dehydrogenase [EC:1.1.1.140]
47	K00073	-2.78447	-3.64493	-2.32547	1.57701	4.07702	0.322415	0.319337	0.10807	0.184523	0.0967065	0.1662	allD; ureidoglycolate dehydrogenase (NAD+) [EC:1.1.1.350]
48	K00074	4.47449	4.80728	4.11835	-0.653631	0.964247	-0.638773	0.244286	0.0170596	0.0505805	0.0118145	0.0418305	paaH, hbd, fadB, mmgB; 3-hydroxybutyryl-CoA dehydrogenase [EC:1.1.1.157]
49	K00075	6.30075	6.4108	5.94849	-0.628522	0.858389	-0.726415	0.215653	0.00309143	0.0178197	0.00518342	0.0279694	murB; UDP-N-acetylmuramate dehydrogenase [EC:1.3.1.98]
50	K00076	2.92259	3.29798	2.35352	-1.18909	1.13478	-1.01506	0.13	4.31e-05	0.0173517	0.000165468	0.017775	hdhA; 7-alpha-hydroxysteroid dehydrogenase [EC:1.1.1.159]
51	K00077	5.67807	5.89163	5.22776	-0.7086	0.856946	-0.756064	0.205143	0.00143932	0.0173527	0.00360896	0.0261621	panE, apbA; 2-dehydropantoate 2-reductase [EC:1.1.1.169]
52	K00078	-7.85031	-8.19641	-7.34792	0.958914	6.98812	0.13206	0.442445	0.566323	0.655874	0.587517	0.673479	DHDH; dihydrodiol dehydrogenase / D-xylose 1-dehydrogenase (NADP) [EC:1.3.1.20 1.1.1.179]
53	K00082	-5.20586	-2.31843	-8.00706	-4.22089	6.23273	-0.60326	0.272494	0.0273003	0.0623298	0.0279465	0.0685339	ribD2; 5-amino-6-(5-phosphoribosylamino)uracil reductase [EC:1.1.1.193]
54	K00086	-4.3597	-4.65468	-4.08207	1.21043	6.70799	0.173428	0.425878	0.487803	0.591913	0.512533	0.619823	dhaT; 1,3-propanediol dehydrogenase [EC:1.1.1.202]
55	K00087	2.58017	2.98015	2.21324	-0.792046	0.965745	-0.729546	0.207369	0.00486483	0.0222614	0.00375519	0.0262494	ygeS, xdhA; xanthine dehydrogenase molybdenum-binding subunit [EC:1.17.1.4]
56	K00088	6.36634	6.5236	5.94603	-0.620294	0.840289	-0.739577	0.226571	0.0021555	0.0173542	0.00890391	0.035311	IMPDH, guaB; IMP dehydrogenase [EC:1.1.1.205]
57	K00090	-3.31855	-4.58314	-2.25793	2.30215	4.10773	0.486061	0.267429	0.0515416	0.10597	0.0228165	0.0616461	ghrB; glyoxylate/hydroxypyruvate/2-ketogluconate reductase [EC:1.1.1.79 1.1.1.81 1.1.1.215]
58	K00091	-2.26401	-1.98979	-2.48076	-0.631662	2.99825	-0.177806	0.394459	0.218513	0.323174	0.355628	0.467824	E1.1.1.219; dihydroflavonol-4-reductase [EC:1.1.1.219]
59	K00094	-2.35524	-4.17996	-1.86044	1.44266	5.33693	0.223413	0.408286	0.327515	0.443533	0.365053	0.478214	E1.1.1.251, gatD; galactitol-1-phosphate 5-dehydrogenase [EC:1.1.1.251]
60	K00096	3.38748	3.73751	2.81981	-0.62542	1.05422	-0.5715	0.259714	0.0218389	0.0601561	0.0198513	0.0575957	araM, egsA; glycerol-1-phosphate dehydrogenase [NAD(P)+] [EC:1.1.1.261]
61	K00097	4.40224	4.61968	4.00984	-0.580407	0.870717	-0.641063	0.203429	0.00195114	0.017354	0.00322118	0.0257047	pdxA; 4-hydroxythreonine-4-phosphate dehydrogenase [EC:1.1.1.262]
62	K00098	-4.56319	-4.89268	-3.50973	1.4846	4.72278	0.26439	0.37932	0.308842	0.415892	0.271733	0.37683	idnD; L-idonate 5-dehydrogenase [EC:1.1.1.264]
63	K00099	6.11522	6.32466	5.86315	-0.673555	0.88036	-0.753197	0.19423	0.00157996	0.017353	0.00224696	0.0243183	dxr; 1-deoxy-D-xylulose-5-phosphate reductoisomerase [EC:1.1.1.267]
64	K00100	6.06208	6.2112	5.57044	-0.639672	0.786819	-0.767724	0.211714	0.00104711	0.0173525	0.00479897	0.0275508	bdhAB; butanol dehydrogenase [EC:1.1.1.-]
65	K00101	-3.00692	-4.56999	-2.43791	2.18133	4.23005	0.460594	0.284	0.0641736	0.124112	0.0315565	0.0749876	lldD; L-lactate dehydrogenase (cytochrome) [EC:1.1.2.3]
66	K00102	-0.457481	0.605623	-2.40338	-3.26461	7.68751	-0.552689	0.177714	0.0251073	0.0610181	0.00161833	0.0217165	LDHD, dld; D-lactate dehydrogenase (cytochrome) [EC:1.1.2.4]
67	K00104	3.47738	4.154	3.03399	-1.01459	1.5126	-0.679515	0.239429	0.00359358	0.0190043	0.0117438	0.0417739	glcD; glycolate oxidase [EC:1.1.3.15]
68	K00105	-3.87917	-3.78618	-4.06628	-0.128017	5.42012	-0.0202821	0.488286	0.697213	0.77501	0.898721	0.931873	E1.1.3.21; alpha-glycerophosphate oxidase [EC:1.1.3.21]
69	K00108	-4.00452	-4.69729	-2.93226	1.99055	4.30049	0.392831	0.32	0.106368	0.182233	0.0907051	0.157999	betA, CHDH; choline dehydrogenase [EC:1.1.99.1]
70	K00111	5.22216	5.41293	4.74952	-0.712424	0.842879	-0.780989	0.205656	0.00358268	0.0189554	0.00342571	0.0258907	glpA, glpD; glycerol-3-phosphate dehydrogenase [EC:1.1.5.3]
71	K00112	-0.437326	-0.448759	-0.437326	-0.0174918	1.781	-0.00766287	0.497001	0.907864	0.937806	0.947746	0.96614	glpB; glycerol-3-phosphate dehydrogenase subunit B [EC:1.1.5.3]
72	K00113	-0.444513	-0.406698	-0.444513	0.0443584	1.79365	0.018595	0.489714	0.915391	0.943263	0.94313	0.962873	glpC; glycerol-3-phosphate dehydrogenase subunit C [EC:1.1.5.3]
73	K00116	-2.80964	-4.55006	-2.27677	2.27623	3.64544	0.531029	0.261354	0.0541879	0.109005	0.0214367	0.0591241	mqo; malate dehydrogenase (quinone) [EC:1.1.5.4]
74	K00117	-3.87257	-4.57273	-2.79938	1.91227	4.32629	0.376502	0.329906	0.119262	0.198284	0.0968304	0.16632	gcd; quinoprotein glucose dehydrogenase [EC:1.1.5.2]
75	K00121	-2.361	-3.29084	-1.9634	1.32864	3.19797	0.33781	0.319909	0.303763	0.41329	0.0881457	0.154827	frmA, ADH5, adhC; S-(hydroxymethyl)glutathione dehydrogenase / alcohol dehydrogenase [EC:1.1.1.284 1.1.1.1]
76	K00123	2.76398	2.82371	2.73357	-0.108376	0.565043	-0.149858	0.421594	0.757138	0.829044	0.460748	0.572793	fdoG, fdhF, fdwA; formate dehydrogenase major subunit [EC:1.17.1.9]
77	K00124	0.728854	0.494673	0.974572	0.337988	1.19984	0.246774	0.386461	0.31381	0.43126	0.282212	0.390905	fdoH, fdsB; formate dehydrogenase iron-sulfur subunit
78	K00127	0.70783	0.526659	1.03479	0.404877	1.34089	0.272218	0.377321	0.210304	0.314947	0.24871	0.354133	fdoI, fdsG; formate dehydrogenase subunit gamma
79	K00128	5.13292	5.39236	4.82727	-0.553067	0.918314	-0.600872	0.245714	0.0134103	0.0430373	0.0130541	0.0445334	ALDH; aldehyde dehydrogenase (NAD+) [EC:1.2.1.3]
80	K00129	-9.66113	-9.57916	-9.72815	0.0126317	4.89402	0.00229003	0.498429	0.552443	0.637427	0.576559	0.657427	E1.2.1.5; aldehyde dehydrogenase (NAD(P)+) [EC:1.2.1.5]
81	K00130	-3.00428	-4.06367	-2.28419	1.75284	3.63717	0.408049	0.295059	0.115116	0.19249	0.0460524	0.0958441	betB, gbsA; betaine-aldehyde dehydrogenase [EC:1.2.1.8]
82	K00131	-0.723779	-0.493471	-0.951388	-0.565432	2.27589	-0.211307	0.397315	0.175763	0.273444	0.321721	0.433128	gapN; glyceraldehyde-3-phosphate dehydrogenase (NADP+) [EC:1.2.1.9]
83	K00132	-7.32897	-6.51534	-7.87808	-1.02532	6.44915	-0.152229	0.424286	0.509215	0.600456	0.479514	0.575065	E1.2.1.10; acetaldehyde dehydrogenase (acetylating) [EC:1.2.1.10]
84	K00133	6.24436	6.36095	5.87725	-0.637132	0.882362	-0.718803	0.206286	0.00229958	0.0173544	0.00410871	0.026811	asd; aspartate-semialdehyde dehydrogenase [EC:1.2.1.11]
85	K00134	6.29223	6.43971	5.99367	-0.609161	0.835942	-0.71616	0.215081	0.00268935	0.0173943	0.00434163	0.0269795	GAPDH, gapA; glyceraldehyde 3-phosphate dehydrogenase [EC:1.2.1.12]
86	K00135	-0.249915	-1.30472	0.107583	0.88377	3.0088	0.286393	0.383605	0.338813	0.457882	0.292357	0.402335	gabD; succinate-semialdehyde dehydrogenase / glutarate-semialdehyde dehydrogenase [EC:1.2.1.16 1.2.1.79 1.2.1.20]
87	K00137	-3.32049	-4.56775	-2.35299	2.31133	4.21752	0.483883	0.27	0.0597724	0.118067	0.0290037	0.0711222	prr; aminobutyraldehyde dehydrogenase [EC:1.2.1.19]
88	K00138	-3.3237	-4.60655	-2.52029	2.23424	4.14913	0.477079	0.278	0.0609714	0.119846	0.0306246	0.0736574	aldB; aldehyde dehydrogenase [EC:1.2.1.-]
89	K00140	-3.34215	-3.46941	-3.21876	0.227332	2.99092	0.0672418	0.462725	0.839733	0.888048	0.739207	0.811831	mmsA, iolA, ALDH6A1; malonate-semialdehyde dehydrogenase (acetylating) / methylmalonate-semialdehyde dehydrogenase [EC:1.2.1.18 1.2.1.27]
90	K00141	-10.0629	-10.014	-10.1013	0.176285	4.88374	0.031086	0.484286	0.533149	0.619307	0.569621	0.647913	xylC; benzaldehyde dehydrogenase (NAD) [EC:1.2.1.28]
91	K00145	5.94998	6.14875	5.50865	-0.728694	0.847649	-0.853143	0.189714	0.000473703	0.0173517	0.00191958	0.0234616	argC; N-acetyl-gamma-glutamyl-phosphate reductase [EC:1.2.1.38]
92	K00146	-8.9071	-9.48822	-8.21458	1.69009	5.62066	0.283377	0.379143	0.324822	0.41379	0.33048	0.417195	feaB; phenylacetaldehyde dehydrogenase [EC:1.2.1.39]
93	K00147	6.11485	6.26111	5.78822	-0.640115	0.856141	-0.738802	0.205656	0.00192908	0.0173537	0.00325328	0.0257443	proA; glutamate-5-semialdehyde dehydrogenase [EC:1.2.1.41]
94	K00148	-10.195	-10.004	-10.3248	-0.133698	4.51457	-0.0276905	0.486718	0.517748	0.604836	0.533366	0.617389	fdhA; glutathione-independent formaldehyde dehydrogenase [EC:1.2.1.46]
95	K00151	-8.65771	-9.03118	-8.26577	1.08284	5.4447	0.172543	0.418	0.454495	0.542223	0.472127	0.557113	hpaE, hpcC; 5-carboxymethyl-2-hydroxymuconic-semialdehyde dehydrogenase [EC:1.2.1.60]
96	K00153	-9.09022	-9.1958	-9.00308	0.232921	4.87183	0.0459618	0.48	0.584319	0.668847	0.617247	0.695112	E1.1.1.306; S-(hydroxymethyl)mycothiol dehydrogenase [EC:1.1.1.306]
97	K00156	0.50447	1.19724	0.268914	-0.871292	1.49714	-0.505463	0.262782	0.0622292	0.124836	0.0218461	0.0603732	poxB; pyruvate dehydrogenase (quinone) [EC:1.2.5.1]
98	K00158	-2.88321	-3.03703	-2.68978	0.81854	5.4131	0.133325	0.425021	0.535011	0.639411	0.503035	0.613332	E1.2.3.3, poxL; pyruvate oxidase [EC:1.2.3.3]
99	K00161	0.78573	0.755979	0.795533	0.0864186	1.49931	0.0603275	0.469009	0.586725	0.693031	0.807729	0.866268	PDHA, pdhA; pyruvate dehydrogenase E1 component alpha subunit [EC:1.2.4.1]
100	K00162	0.78923	0.760792	0.798139	0.0678914	1.51294	0.044726	0.477714	0.580888	0.688144	0.802089	0.862309	PDHB, pdhB; pyruvate dehydrogenase E1 component beta subunit [EC:1.2.4.1]
101	K00163	-2.12039	-2.86139	-0.77239	2.2645	2.52303	0.869027	0.161097	0.0012845	0.0174533	0.000669971	0.0184752	aceE; pyruvate dehydrogenase E1 component [EC:1.2.4.1]
102	K00164	0.132039	-1.31421	0.534972	1.57381	2.05889	0.646662	0.206	0.0105487	0.0361905	0.00388681	0.0265107	OGDH, sucA; 2-oxoglutarate dehydrogenase E1 component [EC:1.2.4.2]
103	K00166	-9.70075	-9.26016	-10.0671	-1.15233	6.37056	-0.181117	0.416	0.347266	0.438416	0.448488	0.531795	BCKDHA, bkdA1; 2-oxoisovalerate dehydrogenase E1 component alpha subunit [EC:1.2.4.4]
104	K00167	-9.70354	-9.22396	-10.0485	-1.07522	6.36334	-0.165097	0.418	0.366428	0.455593	0.443133	0.527028	BCKDHB, bkdA2; 2-oxoisovalerate dehydrogenase E1 component beta subunit [EC:1.2.4.4]
105	K00169	1.7494	2.75557	1.54247	-0.820411	1.33774	-0.578105	0.241645	0.0220461	0.0605734	0.0130602	0.0444637	porA; pyruvate ferredoxin oxidoreductase alpha subunit [EC:1.2.7.1]
106	K00170	2.57805	3.04344	1.87769	-0.975613	1.31941	-0.739863	0.197943	0.00270682	0.0175568	0.00282859	0.0251291	porB; pyruvate ferredoxin oxidoreductase beta subunit [EC:1.2.7.1]
107	K00171	1.46314	2.50603	1.01892	-1.37188	1.71277	-0.570297	0.183429	0.0103684	0.036172	0.00170239	0.0225838	porD; pyruvate ferredoxin oxidoreductase delta subunit [EC:1.2.7.1]
108	K00172	2.67415	3.12255	2.16124	-0.904911	1.30846	-0.686833	0.225364	0.00657608	0.0268783	0.00662101	0.0304954	porG; pyruvate ferredoxin oxidoreductase gamma subunit [EC:1.2.7.1]
109	K00174	5.25556	5.60695	5.03289	-0.571769	0.938105	-0.521558	0.240217	0.00526066	0.0232971	0.0126887	0.0437897	korA, oorA, oforA; 2-oxoglutarate/2-oxoacid ferredoxin oxidoreductase subunit alpha [EC:1.2.7.3 1.2.7.11]
110	K00175	5.24604	5.60018	5.05491	-0.563472	0.972837	-0.516658	0.244787	0.00517664	0.0230653	0.0128272	0.0440596	korB, oorB, oforB; 2-oxoglutarate/2-oxoacid ferredoxin oxidoreductase subunit beta [EC:1.2.7.3 1.2.7.11]
111	K00176	4.59027	4.87997	4.13587	-0.656157	0.911597	-0.564819	0.210797	0.00353338	0.0188391	0.00494435	0.0277238	korD, oorD; 2-oxoglutarate ferredoxin oxidoreductase subunit delta [EC:1.2.7.3]
112	K00177	4.60305	4.88312	4.14051	-0.630364	0.940998	-0.548446	0.220571	0.00358865	0.0189726	0.00531384	0.0282107	korC, oorC; 2-oxoglutarate ferredoxin oxidoreductase subunit gamma [EC:1.2.7.3]
113	K00179	4.54025	4.94775	4.16755	-0.723121	0.897416	-0.753802	0.168809	0.000856503	0.0173524	0.00118444	0.0205636	iorA; indolepyruvate ferredoxin oxidoreductase, alpha subunit [EC:1.2.7.8]
114	K00180	4.54339	4.94791	4.19111	-0.705522	0.897747	-0.73489	0.179377	0.000917183	0.0173525	0.00148038	0.0218397	iorB; indolepyruvate ferredoxin oxidoreductase, beta subunit [EC:1.2.7.8]
115	K00183	-2.09678	-1.69293	-2.34211	-0.766656	2.39362	-0.195304	0.312571	0.235329	0.334642	0.0716358	0.131582	K00183; prokaryotic molybdopterin-containing oxidoreductase family, molybdopterin binding subunit
116	K00184	0.713017	0.99272	-0.2087	-0.963695	1.99831	-0.298574	0.299714	0.0638223	0.127034	0.061553	0.117778	K00184; prokaryotic molybdopterin-containing oxidoreductase family, iron-sulfur binding subunit
117	K00185	-1.31867	-0.676851	-2.06379	-1.4786	2.56658	-0.417036	0.230506	0.0345044	0.0824585	0.00843941	0.0344275	K00185; prokaryotic molybdopterin-containing oxidoreductase family, membrane subunit
118	K00194	2.68579	3.11535	2.46657	-0.52792	0.92218	-0.525405	0.283429	0.0382307	0.0890314	0.030735	0.0742938	cdhD, acsD; acetyl-CoA decarbonylase/synthase complex subunit delta [EC:2.1.1.245]
119	K00196	2.16582	2.61006	2.08685	-0.349108	1.21128	-0.269048	0.390286	0.307787	0.425318	0.321946	0.433716	cooF; anaerobic carbon-monoxide dehydrogenase iron sulfur subunit
120	K00197	2.68774	3.11745	2.47999	-0.552293	0.928913	-0.533888	0.276571	0.03727	0.0875113	0.0298871	0.0730181	cdhE, acsC; acetyl-CoA decarbonylase/synthase complex subunit gamma [EC:2.1.1.245]
121	K00198	3.41427	3.80982	3.31831	-0.467744	0.862646	-0.47486	0.310571	0.0991727	0.175759	0.0707068	0.130741	cooS, acsA; anaerobic carbon-monoxide dehydrogenase catalytic subunit [EC:1.2.7.4]
122	K00208	4.20248	4.53931	4.14747	-0.436145	1.04278	-0.396984	0.316481	0.0472715	0.103211	0.0754122	0.137385	fabI; enoyl-[acyl-carrier protein] reductase I [EC:1.3.1.9 1.3.1.10]
123	K00209	3.16397	3.50503	2.60266	-0.869225	1.03329	-0.817036	0.199143	0.00124207	0.0173525	0.00326244	0.0257083	fabV, ter; enoyl-[acyl-carrier protein] reductase / trans-2-enoyl-CoA reductase (NAD+) [EC:1.3.1.9 1.3.1.44]
124	K00210	3.06446	3.99039	2.64163	-1.04956	2.15465	-0.465622	0.312286	0.0722137	0.138955	0.0601667	0.11582	E1.3.1.12; prephenate dehydrogenase [EC:1.3.1.12]
125	K00215	6.29127	6.39281	6.00854	-0.580261	0.882382	-0.692964	0.213429	0.00374506	0.0193468	0.00538295	0.0283008	dapB; 4-hydroxy-tetrahydrodipicolinate reductase [EC:1.17.1.8]
126	K00216	-3.05285	-4.59658	-2.51164	2.18485	3.52592	0.529149	0.255641	0.0544468	0.109344	0.0199499	0.0567369	entA; 2,3-dihydro-2,3-dihydroxybenzoate dehydrogenase [EC:1.3.1.28]
127	K00218	-7.82997	-8.13582	-7.36636	0.802859	7.02326	0.100656	0.44673	0.595342	0.679697	0.609954	0.692469	por; protochlorophyllide reductase [EC:1.3.1.33]
128	K00219	-1.18851	-1.56812	-0.949184	0.724078	2.75527	0.237971	0.352286	0.486597	0.593279	0.160152	0.248991	fadH; 2,4-dienoyl-CoA reductase (NADPH2) [EC:1.3.1.34]
129	K00226	4.3343	4.66517	4.21761	-0.571378	1.16059	-0.458228	0.298571	0.0285563	0.0730024	0.0547312	0.10807	pyrD; dihydroorotate dehydrogenase (fumarate) [EC:1.3.98.1]
130	K00228	-3.30645	-4.56657	-2.51809	2.27263	4.11035	0.488358	0.273714	0.0590685	0.116565	0.0299041	0.0725134	CPOX, hemF; coproporphyrinogen III oxidase [EC:1.3.3.3]
131	K00230	0.328042	-0.368578	0.572824	0.810251	1.29446	0.609063	0.233362	0.011559	0.0387307	0.00957202	0.0370646	hemG; menaquinone-dependent protoporphyrinogen oxidase [EC:1.3.5.3]
132	K00231	0.242807	0.924657	-0.230772	-1.12051	3.06758	-0.312802	0.360468	0.142182	0.231809	0.192329	0.2896	PPOX, hemY; protoporphyrinogen/coproporphyrinogen III oxidase [EC:1.3.3.4 1.3.3.15]
133	K00232	-10.3232	-9.74103	-10.7256	-1.00802	4.56813	-0.192428	0.398571	0.364877	0.446508	0.37695	0.454653	E1.3.3.6, ACOX1, ACOX3; acyl-CoA oxidase [EC:1.3.3.6]
134	K00239	4.94687	5.28974	4.81071	-0.750914	0.956455	-0.79788	0.19166	0.000476863	0.0173517	0.00199392	0.0235345	sdhA, frdA; succinate dehydrogenase / fumarate reductase, flavoprotein subunit [EC:1.3.5.1 1.3.5.4]
135	K00240	4.79701	5.05922	4.70752	-0.707143	1.00667	-0.700652	0.207655	0.00141327	0.0173527	0.0036957	0.0262181	sdhB, frdB; succinate dehydrogenase / fumarate reductase, iron-sulfur subunit [EC:1.3.5.1 1.3.5.4]
136	K00241	4.19528	4.50183	3.91911	-0.616405	1.10479	-0.466451	0.264857	0.00964175	0.0346858	0.0232038	0.062866	sdhC, frdC; succinate dehydrogenase / fumarate reductase, cytochrome b subunit
137	K00242	-3.14761	-4.32386	-2.41751	1.97792	3.12433	0.539003	0.276857	0.088904	0.1562	0.0337572	0.0781593	sdhD, frdD; succinate dehydrogenase / fumarate reductase, membrane anchor subunit
138	K00243	5.5585	5.82975	5.26157	-0.592698	0.892293	-0.676823	0.223365	0.00290854	0.0175839	0.00776114	0.0328217	K00243; uncharacterized protein
139	K00244	4.86188	4.97423	4.81107	-0.0719132	1.1166	-0.0595199	0.467714	0.926745	0.951634	0.833904	0.887721	frdA; fumarate reductase flavoprotein subunit [EC:1.3.5.4]
140	K00245	0.272226	0.0981007	0.437935	0.465327	1.01108	0.397467	0.308483	0.0754665	0.143049	0.079307	0.142453	frdB; fumarate reductase iron-sulfur subunit [EC:1.3.5.4]
141	K00246	0.249071	0.0851866	0.425999	0.490512	1.04344	0.404622	0.306286	0.0794	0.148512	0.0725348	0.133081	frdC; fumarate reductase subunit C
142	K00247	-2.21285	-2.99523	-0.763931	2.32212	2.46692	0.90438	0.153956	0.00105471	0.017412	0.000568679	0.0182723	frdD; fumarate reductase subunit D
143	K00248	4.41186	4.81342	4.09055	-0.972697	1.12419	-0.832012	0.196801	0.000647925	0.0173517	0.00273986	0.0250544	ACADS, bcd; butyryl-CoA dehydrogenase [EC:1.3.8.1]
144	K00249	-10.2891	-10.0357	-10.4987	-0.409133	4.34192	-0.074469	0.460857	0.491618	0.576132	0.498136	0.580749	ACADM, acd; acyl-CoA dehydrogenase [EC:1.3.8.7]
145	K00252	-10.3442	-9.77405	-10.7066	-1.04844	4.51053	-0.210234	0.400571	0.378262	0.460137	0.387623	0.464796	GCDH, gcdH; glutaryl-CoA dehydrogenase [EC:1.3.8.6]
146	K00254	1.99085	1.94488	2.03249	0.191006	1.60451	0.110586	0.449143	0.537243	0.650203	0.665307	0.757242	DHODH, pyrD; dihydroorotate dehydrogenase [EC:1.3.5.2]
147	K00257	3.8373	4.37663	3.6663	-0.637659	1.408	-0.404333	0.282857	0.03341	0.0813409	0.0362513	0.0821049	mbtN, fadE14; acyl-ACP dehydrogenase [EC:1.3.99.-]
148	K00259	3.85665	4.44734	3.39972	-0.743128	1.19036	-0.661354	0.253071	0.0100928	0.0356947	0.0134798	0.045516	ald; alanine dehydrogenase [EC:1.4.1.1]
149	K00260	0.363009	0.273856	0.403666	0.201771	1.81285	0.107993	0.45	0.705828	0.789808	0.63445	0.731589	gudB, rocG; glutamate dehydrogenase [EC:1.4.1.2]
150	K00261	-1.58039	-2.95197	-0.772399	1.40176	2.6139	0.419931	0.296571	0.383584	0.490927	0.057713	0.112347	GLUD1_2, gdhA; glutamate dehydrogenase (NAD(P)+) [EC:1.4.1.3]
151	K00262	6.39819	6.65029	6.07546	-0.658747	0.868981	-0.737005	0.220508	0.00151985	0.017353	0.00559371	0.0285553	E1.4.1.4, gdhA; glutamate dehydrogenase (NADP+) [EC:1.4.1.4]
152	K00263	-9.19663	-8.80404	-9.5051	-0.708115	5.50192	-0.116325	0.445714	0.551039	0.633944	0.551556	0.634528	E1.4.1.9; leucine dehydrogenase [EC:1.4.1.9]
153	K00265	4.50877	4.63786	4.30082	-0.61805	1.06337	-0.549445	0.239429	0.00474244	0.0219026	0.0115176	0.0412117	gltB; glutamate synthase (NADPH/NADH) large chain [EC:1.4.1.13 1.4.1.14]
154	K00266	7.19495	7.32707	7.00145	-0.607219	0.918826	-0.674173	0.219429	0.00404285	0.0200879	0.00620094	0.0296111	gltD; glutamate synthase (NADPH/NADH) small chain [EC:1.4.1.13 1.4.1.14]
155	K00270	-10.3021	-10.0879	-10.4687	-0.21689	4.45898	-0.0404538	0.477714	0.497247	0.582373	0.517635	0.596263	pdh; phenylalanine dehydrogenase [EC:1.4.1.20]
156	K00274	-9.43656	-9.29891	-9.53959	-0.0528759	5.15066	-0.00908717	0.495001	0.604337	0.687036	0.634242	0.711287	MAO, aofH; monoamine oxidase [EC:1.4.3.4]
157	K00275	2.18058	2.062	2.20246	-0.330842	2.02152	-0.144251	0.454571	0.292041	0.408539	0.660466	0.75323	pdxH, PNPO; pyridoxamine 5'-phosphate oxidase [EC:1.4.3.5]
158	K00276	-8.48558	-9.05136	-7.79625	1.48821	5.3695	0.241861	0.390857	0.383562	0.47436	0.355755	0.446589	AOC3, AOC2, tynA; primary-amine oxidase [EC:1.4.3.21]
159	K00278	5.95343	6.13942	5.64009	-0.717446	0.935816	-0.757412	0.200514	0.00177417	0.0173535	0.00362122	0.0261588	nadB; L-aspartate oxidase [EC:1.4.3.16]
160	K00281	3.84163	4.28152	3.62396	-0.605166	1.63513	-0.391398	0.31134	0.0850291	0.156549	0.0698467	0.129616	GLDC, gcvP; glycine dehydrogenase [EC:1.4.4.2]
161	K00282	1.63452	2.30579	1.46071	-1.05296	2.19473	-0.47252	0.260857	0.0525439	0.111001	0.0221202	0.0614171	gcvPA; glycine dehydrogenase subunit 1 [EC:1.4.4.2]
162	K00283	1.63336	2.30574	1.47763	-1.03661	2.10243	-0.469862	0.267638	0.0558612	0.115812	0.0234479	0.0635143	gcvPB; glycine dehydrogenase subunit 2 [EC:1.4.4.2]
163	K00284	4.90044	5.19913	4.60339	-0.73801	0.897506	-0.744499	0.209714	0.00233216	0.0173571	0.00397012	0.0265343	E1.4.7.1; glutamate synthase (ferredoxin) [EC:1.4.7.1]
164	K00285	-2.9636	-4.5622	-2.28917	2.35159	4.0461	0.500048	0.257641	0.0526401	0.10744	0.0207742	0.0581888	dadA; D-amino-acid dehydrogenase [EC:1.4.5.1]
165	K00286	6.28463	6.41264	5.96826	-0.602171	0.850994	-0.725084	0.204799	0.00191336	0.017354	0.00384945	0.026473	proC; pyrroline-5-carboxylate reductase [EC:1.5.1.2]
166	K00287	5.88467	6.09236	5.53276	-0.649034	0.826176	-0.740473	0.228792	0.00211749	0.0173544	0.00797054	0.0332287	DHFR, folA; dihydrofolate reductase [EC:1.5.1.3]
167	K00289	-4.51943	-4.27993	-4.64888	0.0215015	5.68329	0.00354558	0.498715	0.747342	0.8144	0.869511	0.909974	ALDH1L; formyltetrahydrofolate dehydrogenase [EC:1.5.1.6]
168	K00290	5.49701	5.66404	5.18512	-0.632315	0.905942	-0.692152	0.231714	0.00291909	0.017589	0.00774824	0.032714	LYS1; saccharopine dehydrogenase (NAD+, L-lysine forming) [EC:1.5.1.7]
169	K00294	-0.817207	0.427104	-1.67291	-2.08346	3.20335	-0.546516	0.183376	0.00518602	0.0232059	0.00147797	0.0217271	E1.2.1.88; 1-pyrroline-5-carboxylate dehydrogenase [EC:1.2.1.88]
170	K00297	6.0172	6.26274	5.61868	-0.722178	0.870953	-0.874733	0.167714	0.000334679	0.0173517	0.000899543	0.0192732	metF, MTHFR; methylenetetrahydrofolate reductase (NADPH) [EC:1.5.1.20]
171	K00298	-6.91564	-7.60853	-6.52416	1.08967	7.06344	0.142259	0.439017	0.575122	0.664793	0.601275	0.687516	ceo; N5-(carboxyethyl)ornithine synthase [EC:1.5.1.24]
172	K00299	-3.30767	-4.32142	-2.53349	1.95145	3.79635	0.453709	0.289143	0.102037	0.175309	0.0453093	0.0947625	ssuE; FMN reductase [EC:1.5.1.38]
173	K00301	-9.98491	-9.41063	-10.3852	-0.976508	4.5602	-0.191395	0.403313	0.404714	0.488727	0.393223	0.473331	E1.5.3.1; sarcosine oxidase [EC:1.5.3.1]
174	K00302	-9.66161	-8.80685	-10.1677	-1.50297	5.27848	-0.252497	0.379429	0.330769	0.413802	0.307415	0.388212	soxA; sarcosine oxidase, subunit alpha [EC:1.5.3.1]
175	K00303	-9.43594	-9.26344	-9.56712	0.150903	6.97051	0.0209459	0.492	0.616007	0.698719	0.646058	0.720869	soxB; sarcosine oxidase, subunit beta [EC:1.5.3.1]
176	K00313	-0.486883	-1.50507	-0.0494424	0.818319	2.03529	0.395852	0.321908	0.102805	0.180417	0.0995594	0.170285	fixC; electron transfer flavoprotein-quinone oxidoreductase [EC:1.5.5.-]
177	K00316	-9.24879	-10.0061	-8.26843	2.42433	5.41238	0.400028	0.332571	0.171172	0.242075	0.184782	0.257715	spdH; spermidine dehydrogenase [EC:1.5.99.6]
178	K00318	-1.354	0.0369405	-2.14561	-2.47774	4.24201	-0.637518	0.149386	0.00208259	0.0177838	0.000430061	0.0178509	PRODH; proline dehydrogenase [EC:1.5.-.-]
179	K00322	-3.30434	-4.5933	-2.51751	2.28717	4.24302	0.467835	0.276492	0.0610341	0.119456	0.0302971	0.0731316	sthA, udhA; NAD(P) transhydrogenase [EC:1.6.1.1]
180	K00324	3.65116	4.1016	3.26607	-0.972843	1.87408	-0.490627	0.300771	0.0164331	0.0493538	0.0578375	0.112455	pntA; NAD(P) transhydrogenase subunit alpha [EC:1.6.1.2]
181	K00325	2.68788	3.13809	2.35403	-0.876014	1.73525	-0.459553	0.317338	0.0294488	0.0745924	0.0757638	0.137977	pntB; NAD(P) transhydrogenase subunit beta [EC:1.6.1.2]
182	K00330	3.87345	4.32225	3.7705	-0.594759	1.10449	-0.46987	0.27078	0.0138485	0.0439636	0.0279823	0.0702201	nuoA; NADH-quinone oxidoreductase subunit A [EC:1.6.5.3]
183	K00331	3.87079	4.3291	3.7692	-0.578276	1.12634	-0.448654	0.274493	0.0138149	0.0439039	0.0273364	0.069281	nuoB; NADH-quinone oxidoreductase subunit B [EC:1.6.5.3]
184	K00332	-6.28698	-4.94403	-6.37872	-0.969888	6.72521	-0.13892	0.436286	0.607969	0.694777	0.541547	0.640033	nuoC; NADH-quinone oxidoreductase subunit C [EC:1.6.5.3]
185	K00333	-6.2431	-5.0076	-6.36861	-1.02241	6.70096	-0.146279	0.435714	0.617395	0.701318	0.554912	0.651003	nuoD; NADH-quinone oxidoreductase subunit D [EC:1.6.5.3]
186	K00334	5.12096	5.64409	4.70952	-0.841838	0.946936	-0.853177	0.185947	0.00122581	0.0173525	0.00175011	0.022956	nuoE; NADH-quinone oxidoreductase subunit E [EC:1.6.5.3]
187	K00335	4.6804	5.13023	4.04678	-0.895352	0.914893	-0.922724	0.167952	0.000336868	0.0173517	0.000944053	0.0194132	nuoF; NADH-quinone oxidoreductase subunit F [EC:1.6.5.3]
188	K00336	5.27654	5.59683	5.10708	-0.622354	0.840357	-0.727372	0.217714	0.00437523	0.0209448	0.00453988	0.0272031	nuoG; NADH-quinone oxidoreductase subunit G [EC:1.6.5.3]
189	K00337	3.905	4.33963	3.79894	-0.58901	1.10416	-0.456218	0.279714	0.0135042	0.0432378	0.0325774	0.076874	nuoH; NADH-quinone oxidoreductase subunit H [EC:1.6.5.3]
190	K00338	3.87184	4.33562	3.77006	-0.604455	1.11937	-0.457192	0.273143	0.0138994	0.0440804	0.0280171	0.0702714	nuoI; NADH-quinone oxidoreductase subunit I [EC:1.6.5.3]
191	K00339	3.87112	4.32257	3.77182	-0.58783	1.12189	-0.457012	0.279063	0.0138225	0.0439235	0.0277355	0.069875	nuoJ; NADH-quinone oxidoreductase subunit J [EC:1.6.5.3]
192	K00340	3.8709	4.32909	3.77005	-0.574768	1.12156	-0.452111	0.271065	0.0138987	0.0440744	0.0281021	0.0704179	nuoK; NADH-quinone oxidoreductase subunit K [EC:1.6.5.3]
193	K00341	3.87147	4.31964	3.77403	-0.559721	1.09801	-0.462583	0.272494	0.0140383	0.044384	0.0283109	0.0706793	nuoL; NADH-quinone oxidoreductase subunit L [EC:1.6.5.3]
194	K00342	3.8697	4.33106	3.77034	-0.571971	1.12346	-0.456562	0.272494	0.014175	0.0446548	0.0288602	0.0714968	nuoM; NADH-quinone oxidoreductase subunit M [EC:1.6.5.3]
195	K00343	3.87194	4.3195	3.77081	-0.578602	1.10813	-0.446823	0.275921	0.0138507	0.0439833	0.0282475	0.070623	nuoN; NADH-quinone oxidoreductase subunit N [EC:1.6.5.3]
196	K00344	-2.46316	-3.86238	-2.0733	1.63211	3.14235	0.423493	0.305341	0.151361	0.238167	0.0612586	0.11725	qor, CRYZ; NADPH2:quinone reductase [EC:1.6.5.5]
197	K00346	4.08093	4.3836	3.89828	-0.536262	1.15043	-0.418136	0.292571	0.0182375	0.0529901	0.0483165	0.0990062	nqrA; Na+-transporting NADH:ubiquinone oxidoreductase subunit A [EC:1.6.5.8]
198	K00347	4.08097	4.37596	3.89718	-0.536949	1.17015	-0.398982	0.293916	0.0182212	0.052957	0.0480674	0.0986335	nqrB; Na+-transporting NADH:ubiquinone oxidoreductase subunit B [EC:1.6.5.8]
199	K00348	4.0799	4.38097	3.90268	-0.536143	1.14585	-0.40141	0.292773	0.0188541	0.0542315	0.0491639	0.100194	nqrC; Na+-transporting NADH:ubiquinone oxidoreductase subunit C [EC:1.6.5.8]
200	K00349	4.08163	4.38409	3.8972	-0.541229	1.14715	-0.419883	0.294571	0.0182421	0.0529991	0.0479117	0.0984385	nqrD; Na+-transporting NADH:ubiquinone oxidoreductase subunit D [EC:1.6.5.8]
201	K00350	4.08282	4.38732	3.89874	-0.535385	1.15283	-0.397707	0.302857	0.0182965	0.0531053	0.0485699	0.0993239	nqrE; Na+-transporting NADH:ubiquinone oxidoreductase subunit E [EC:1.6.5.8]
202	K00351	4.08267	4.38395	3.89862	-0.530361	1.17438	-0.413884	0.295429	0.0183134	0.0531492	0.0478043	0.0982694	nqrF; Na+-transporting NADH:ubiquinone oxidoreductase subunit F [EC:1.6.5.8]
203	K00354	-4.80595	-6.80096	-4.27971	1.69157	6.0022	0.255828	0.376	0.372036	0.474654	0.245813	0.346141	E1.6.99.1; NADPH2 dehydrogenase [EC:1.6.99.1]
204	K00355	-1.0058	-1.41046	-0.633705	0.587405	2.32829	0.213023	0.405313	0.651267	0.745015	0.376215	0.489195	NQO1; NAD(P)H dehydrogenase (quinone) [EC:1.6.5.2]
205	K00356	-10.0045	-10.0718	-9.94013	0.317336	4.69593	0.061522	0.472571	0.517933	0.60159	0.533932	0.615443	E1.6.99.3; NADH dehydrogenase [EC:1.6.99.3]
206	K00362	-2.35134	-3.67871	-1.47072	2.29338	3.56718	0.53464	0.222222	0.0404484	0.0884482	0.00698503	0.0317056	nirB; nitrite reductase (NADH) large subunit [EC:1.7.1.15]
207	K00363	-3.14442	-4.57557	-2.33118	2.29112	3.57496	0.54731	0.256784	0.0521621	0.105808	0.0190367	0.0550421	nirD; nitrite reductase (NADH) small subunit [EC:1.7.1.15]
208	K00364	0.98775	0.9332	1.01877	0.629126	1.71236	0.318276	0.377035	0.158001	0.251684	0.253845	0.360094	E1.7.1.7, guaC; GMP reductase [EC:1.7.1.7]
209	K00366	3.55533	3.84317	3.4135	-0.387304	1.15095	-0.313192	0.357714	0.171682	0.268596	0.184301	0.279876	nirA; ferredoxin-nitrite reductase [EC:1.7.7.1]
210	K00368	-8.6945	-9.22049	-8.33569	1.03101	5.11046	0.182219	0.415143	0.436726	0.528289	0.457066	0.543831	nirK; nitrite reductase (NO-forming) [EC:1.7.2.1]
211	K00370	-0.166938	-1.34827	0.531884	1.99187	2.25104	0.863262	0.190803	0.00178307	0.0173729	0.00256177	0.0244832	narG, narZ, nxrA; nitrate reductase / nitrite oxidoreductase, alpha subunit [EC:1.7.5.1 1.7.99.-]
212	K00371	-0.171998	-1.34608	0.530851	1.98195	2.25935	0.832532	0.197943	0.00182024	0.0173742	0.00257159	0.0245662	narH, narY, nxrB; nitrate reductase / nitrite oxidoreductase, beta subunit [EC:1.7.5.1 1.7.99.-]
213	K00372	-0.698059	-0.745955	-0.514488	0.264896	2.63459	0.0834532	0.458571	0.883642	0.920271	0.738513	0.814442	nasA; assimilatory nitrate reductase catalytic subunit [EC:1.7.99.-]
214	K00373	0.0520291	-1.3455	0.498798	1.79739	2.39725	0.701616	0.250857	0.0102462	0.0359937	0.0146318	0.0477551	narJ, narW; nitrate reductase molybdenum cofactor assembly chaperone NarJ/NarW
215	K00374	-0.0442247	-0.78231	0.555738	1.25877	1.70926	0.707542	0.22565	0.00474234	0.0220833	0.00720547	0.0320958	narI, narV; nitrate reductase gamma subunit [EC:1.7.5.1 1.7.99.-]
216	K00375	5.42154	5.68845	5.1304	-0.66831	0.897719	-0.700473	0.228221	0.00643281	0.0264848	0.00917495	0.035905	K00375; GntR family transcriptional regulator / MocR family aminotransferase
217	K00380	-1.69451	-2.82698	-0.758991	1.86806	2.54972	0.650765	0.22	0.0109312	0.037161	0.00719261	0.0321835	cysJ; sulfite reductase (NADPH) flavoprotein alpha-component [EC:1.8.1.2]
218	K00381	-3.06524	-4.17584	-2.4729	1.55842	4.23843	0.304789	0.365895	0.184301	0.27979	0.201444	0.299564	cysI; sulfite reductase (NADPH) hemoprotein beta-component [EC:1.8.1.2]
219	K00382	5.21102	5.49019	5.10146	-0.524831	0.881193	-0.621622	0.246215	0.00784532	0.0302312	0.0133433	0.0450325	DLD, lpd, pdhD; dihydrolipoamide dehydrogenase [EC:1.8.1.4]
220	K00383	0.167483	-0.580214	0.333553	0.662955	2.56145	0.265514	0.393316	0.215147	0.320701	0.298544	0.40859	GSR, gor; glutathione reductase (NADPH) [EC:1.8.1.7]
221	K00384	6.95016	7.16304	6.65661	-0.523799	0.794895	-0.642052	0.24593	0.0100501	0.0356186	0.0133686	0.0450206	trxB, TRR; thioredoxin reductase (NADPH) [EC:1.8.1.9]
222	K00385	0.952897	0.62459	1.33866	0.437951	1.78564	0.197457	0.400457	0.731822	0.810161	0.349083	0.462045	asrC; anaerobic sulfite reductase subunit C
223	K00389	-2.10633	-2.40978	-1.81963	0.558171	3.1017	0.157972	0.409597	0.653349	0.740982	0.401302	0.514322	yidH; putative membrane protein
224	K00390	3.29865	3.60848	3.03254	-0.426917	1.53469	-0.208177	0.374179	0.914127	0.943194	0.244296	0.349651	cysH; phosphoadenosine phosphosulfate reductase [EC:1.8.4.8 1.8.4.10]
225	K00392	-10.2304	-9.43085	-10.7017	-1.49044	4.83685	-0.274909	0.360183	0.301122	0.37458	0.295631	0.367786	sir; sulfite reductase (ferredoxin) [EC:1.8.7.1]
226	K00394	2.71774	2.94045	1.96737	-1.09813	1.30798	-0.725555	0.198571	0.0335695	0.0799313	0.00248424	0.0244932	aprA; adenylylsulfate reductase, subunit A [EC:1.8.99.2]
227	K00395	2.71452	2.93913	1.96314	-1.10493	1.28326	-0.735991	0.198229	0.0332944	0.079186	0.00245847	0.0244468	aprB; adenylylsulfate reductase, subunit B [EC:1.8.99.2]
228	K00410	-9.47215	-10.0316	-8.71469	2.1016	5.50493	0.348235	0.346472	0.21746	0.295129	0.255879	0.334837	fbcH; ubiquinol-cytochrome c reductase cytochrome b/c1 subunit
229	K00411	-9.46855	-10.0544	-8.80862	1.85757	5.36429	0.31841	0.356755	0.229714	0.304259	0.261169	0.339712	UQCRFS1, RIP1, petA; ubiquinol-cytochrome c reductase iron-sulfur subunit [EC:1.10.2.2]
230	K00412	-9.4765	-10.1198	-8.79966	1.95949	5.43706	0.322345	0.353899	0.227822	0.30342	0.25558	0.333987	CYTB, petB; ubiquinol-cytochrome c reductase cytochrome b subunit
231	K00425	4.41963	4.58611	4.10067	-0.484797	1.0411	-0.421302	0.307429	0.0398531	0.0916922	0.0659606	0.124032	cydA; cytochrome bd ubiquinol oxidase subunit I [EC:1.10.3.14]
232	K00426	4.41793	4.58606	4.09875	-0.490228	1.01374	-0.425023	0.307055	0.0389849	0.0903209	0.0648767	0.122497	cydB; cytochrome bd ubiquinol oxidase subunit II [EC:1.10.3.14]
233	K00427	-3.30717	-4.5836	-2.52623	2.21789	4.18282	0.476216	0.276207	0.0600258	0.118786	0.0303163	0.0732395	lldP, lctP; L-lactate permease
234	K00428	1.57841	1.56346	1.61234	0.284645	1.81082	0.126656	0.438446	0.465386	0.58386	0.544858	0.652533	E1.11.1.5; cytochrome c peroxidase [EC:1.11.1.5]
235	K00432	4.06361	4.31364	3.3481	-0.763131	1.04874	-0.679711	0.207655	0.00267071	0.0175153	0.00345706	0.025921	gpx; glutathione peroxidase [EC:1.11.1.9]
236	K00433	0.959347	0.92701	0.962814	0.0187926	1.76852	0.00986563	0.495143	0.899432	0.932626	0.943946	0.963436	cpo; non-heme chloroperoxidase [EC:1.11.1.10]
237	K00435	-9.78852	-10.0815	-9.50691	0.986754	5.06489	0.167185	0.416167	0.430279	0.514391	0.450917	0.531519	hemQ; Fe-coproporphyrin III decarboxylase [EC:1.11.1.-]
238	K00437	-5.95155	-2.684	-9.07473	-4.90534	6.91752	-0.636395	0.261354	0.0231692	0.0562749	0.0258146	0.0644262	hydB; [NiFe] hydrogenase large subunit [EC:1.12.2.1]
239	K00441	-4.53332	-4.30951	-4.65377	0.0523853	5.6216	0.00907461	0.495001	0.748402	0.815334	0.862114	0.904614	frhB; coenzyme F420 hydrogenase subunit beta [EC:1.12.98.1]
240	K00448	-9.52504	-9.55053	-9.50917	0.397799	5.29181	0.0651442	0.464439	0.569778	0.653133	0.586582	0.665744	pcaG; protocatechuate 3,4-dioxygenase, alpha subunit [EC:1.13.11.3]
241	K00449	-9.53607	-9.56863	-9.4922	0.297913	5.33514	0.047653	0.472722	0.558357	0.641908	0.581984	0.662294	pcaH; protocatechuate 3,4-dioxygenase, beta subunit [EC:1.13.11.3]
242	K00450	0.96595	1.4545	0.902675	-0.876635	1.95852	-0.429115	0.340571	0.098555	0.174873	0.133229	0.215379	E1.13.11.4; gentisate 1,2-dioxygenase [EC:1.13.11.4]
243	K00453	-10.292	-10.0288	-10.4897	-0.365722	4.47135	-0.0760179	0.461868	0.472683	0.557991	0.492814	0.573798	TDO2, kynA; tryptophan 2,3-dioxygenase [EC:1.13.11.11]
244	K00455	-8.67442	-9.00939	-8.29699	1.02661	5.33903	0.171737	0.416571	0.467141	0.555151	0.481532	0.568183	hpaD, hpcB; 3,4-dihydroxyphenylacetate 2,3-dioxygenase [EC:1.13.11.15]
245	K00457	-9.5071	-9.56657	-9.44809	0.289497	5.40925	0.0427613	0.478857	0.566609	0.651382	0.585498	0.665712	HPD, hppD; 4-hydroxyphenylpyruvate dioxygenase [EC:1.13.11.27]
246	K00459	-0.056803	0.274384	-0.740393	-0.92375	2.89242	-0.27201	0.321622	0.0495854	0.106295	0.085276	0.151073	ncd2, npd; nitronate monooxygenase [EC:1.13.12.16]
247	K00467	-8.5761	-6.60182	-9.3848	-2.08045	6.92903	-0.288899	0.366571	0.308206	0.401594	0.263635	0.353951	E1.13.12.4; lactate 2-monooxygenase [EC:1.13.12.4]
248	K00480	-8.94934	-9.55479	-8.12752	2.22621	5.75935	0.343342	0.357612	0.216544	0.294407	0.232285	0.311919	E1.14.13.1; salicylate hydroxylase [EC:1.14.13.1]
249	K00481	-9.52473	-9.54857	-9.49163	0.290185	5.315	0.0440924	0.478435	0.56475	0.648605	0.588777	0.668112	pobA; p-hydroxybenzoate 3-monooxygenase [EC:1.14.13.2]
250	K00483	-4.9352	-5.51889	-4.43741	0.493011	5.76197	0.075456	0.46	0.677117	0.754747	0.688169	0.767543	hpaB; 4-hydroxyphenylacetate 3-monooxygenase [EC:1.14.14.9]
251	K00484	-8.44981	-9.00847	-7.73798	1.83499	5.49015	0.30304	0.367324	0.289613	0.376046	0.272685	0.359464	hpaC; flavin reductase (NADH) [EC:1.5.1.36]
252	K00491	-10.2272	-10.1212	-10.3059	-0.0585645	4.732	-0.0112769	0.494145	0.520491	0.608215	0.540275	0.621764	nos; nitric-oxide synthase, bacterial [EC:1.14.14.47]
253	K00510	-3.98967	-5.09676	-3.74655	1.18656	5.50236	0.180226	0.414286	0.405353	0.513826	0.416041	0.528347	HMOX1; heme oxygenase 1 [EC:1.14.14.18]
254	K00517	-9.21807	-9.4521	-9.03277	0.615639	4.64887	0.113212	0.441429	0.491222	0.578398	0.511971	0.593407	CYP81F; indol-3-yl-methylglucosinolate hydroxylase [EC:1.14.-.-]
255	K00520	-7.99344	-5.06801	-9.41277	-4.03312	7.32652	-0.518057	0.279714	0.0705234	0.12889	0.052272	0.101955	merA; mercuric reductase [EC:1.16.1.1]
256	K00523	-2.4998	-2.6932	-1.81143	0.600365	6.62606	0.0900873	0.448729	0.792291	0.851627	0.589451	0.690753	ascD, ddhD, rfbI; CDP-4-dehydro-6-deoxyglucose reductase, E3 [EC:1.17.1.1]
257	K00525	5.60271	5.82416	5.46697	-0.418831	0.765966	-0.526944	0.281634	0.017762	0.0519872	0.0346025	0.0797452	E1.17.4.1A, nrdA, nrdE; ribonucleoside-diphosphate reductase alpha chain [EC:1.17.4.1]
258	K00526	4.50346	4.66023	4.32716	-0.240934	0.846084	-0.261009	0.397029	0.25833	0.370751	0.348884	0.462104	E1.17.4.1B, nrdB, nrdF; ribonucleoside-diphosphate reductase beta chain [EC:1.17.4.1]
259	K00527	6.72456	6.84859	6.46538	-0.646451	0.84941	-0.705009	0.226792	0.00484526	0.0221628	0.00759089	0.0324096	rtpR; ribonucleoside-triphosphate reductase (thioredoxin) [EC:1.17.4.2]
260	K00528	5.76877	6.04952	5.36405	-0.765224	0.847785	-0.837328	0.186286	0.00145844	0.017353	0.0017712	0.0230642	fpr; ferredoxin/flavodoxin---NADP+ reductase [EC:1.18.1.2 1.19.1.1]
261	K00529	-7.54233	-8.12746	-6.79805	1.3856	5.71773	0.217749	0.402456	0.457618	0.5502	0.395442	0.492835	hcaD; 3-phenylpropionate/trans-cinnamate dioxygenase ferredoxin reductase component [EC:1.18.1.3]
262	K00532	0.483533	0.239919	0.934247	0.460685	1.66103	0.212707	0.396286	0.932911	0.955242	0.316832	0.428514	E1.12.7.2; ferredoxin hydrogenase [EC:1.12.7.2]
263	K00533	2.69585	3.10456	2.54253	-0.668241	1.04556	-0.60794	0.256	0.0137186	0.0436413	0.016838	0.0520254	E1.12.7.2L; ferredoxin hydrogenase large subunit [EC:1.12.7.2]
264	K00534	-5.96116	-2.67785	-9.08778	-4.98513	6.90395	-0.651231	0.262286	0.0244547	0.0577159	0.024085	0.0619215	E1.12.7.2S; ferredoxin hydrogenase small subunit [EC:1.12.7.2]
265	K00537	5.54902	5.78322	5.32317	-0.587551	0.790204	-0.7079	0.234219	0.00809132	0.0308729	0.00878852	0.0350426	ARSC1, arsC; arsenate reductase [EC:1.20.4.1]
266	K00547	2.50072	2.82851	2.25713	-0.415773	1.12309	-0.369046	0.340571	0.122312	0.206416	0.1344	0.216853	mmuM, BHMT2; homocysteine S-methyltransferase [EC:2.1.1.10]
267	K00548	6.29199	6.55918	5.99866	-0.604653	0.811295	-0.718437	0.225429	0.00353212	0.0188241	0.00755987	0.0323289	metH, MTR; 5-methyltetrahydrofolate--homocysteine methyltransferase [EC:2.1.1.13]
268	K00549	3.97859	4.05964	3.68312	-0.483811	0.939757	-0.511531	0.296286	0.0346675	0.0833335	0.0491244	0.100153	metE; 5-methyltetrahydropteroyltriglutamate--homocysteine methyltransferase [EC:2.1.1.14]
269	K00554	6.19492	6.35028	5.82733	-0.643952	0.838113	-0.721806	0.216857	0.00353192	0.0188228	0.00643231	0.029936	trmD; tRNA (guanine37-N1)-methyltransferase [EC:2.1.1.228]
270	K00556	0.388526	1.34621	-0.975092	-1.35765	2.55355	-0.555514	0.220508	0.0263842	0.0684512	0.00645637	0.0303506	trmH; tRNA (guanosine-2'-O-)-methyltransferase [EC:2.1.1.34]
271	K00557	-0.622256	-2.71868	-0.406587	2.03351	3.71943	0.490169	0.343429	0.0772941	0.145879	0.13127	0.21276	trmA; tRNA (uracil-5-)-methyltransferase [EC:2.1.1.35]
272	K00558	6.6756	7.1315	6.37304	-0.702371	0.890752	-0.774119	0.20337	0.00608878	0.0255696	0.00330833	0.0257874	DNMT1, dcm; DNA (cytosine-5)-methyltransferase 1 [EC:2.1.1.37]
273	K00560	5.79161	5.95046	5.50818	-0.714658	0.850627	-0.801144	0.204571	0.000899164	0.0173523	0.00386084	0.0264084	thyA, TYMS; thymidylate synthase [EC:2.1.1.45]
274	K00561	1.62631	1.7761	1.60098	-0.305141	2.73456	-0.111296	0.442159	0.484535	0.601869	0.598473	0.701632	ermC, ermA; 23S rRNA (adenine-N6)-dimethyltransferase [EC:2.1.1.184]
275	K00563	4.07133	4.51111	3.76544	-0.571666	1.09722	-0.365824	0.325621	0.66496	0.75827	0.101439	0.17346	rlmA1; 23S rRNA (guanine745-N1)-methyltransferase [EC:2.1.1.187]
276	K00564	1.95786	1.75822	2.53409	0.811903	1.44273	0.496527	0.294487	0.0500433	0.107276	0.0509323	0.102772	rsmC; 16S rRNA (guanine1207-N2)-methyltransferase [EC:2.1.1.172]
277	K00566	6.64246	6.77827	6.26424	-0.558356	0.921441	-0.583028	0.237714	0.00680752	0.0275034	0.0117903	0.0414352	mnmA, trmU; tRNA-uridine 2-sulfurtransferase [EC:2.8.1.13]
278	K00567	5.83755	6.05164	5.61489	-0.598943	0.8505	-0.676415	0.228857	0.00407705	0.0201773	0.00827468	0.0338933	ogt, MGMT; methylated-DNA-[protein]-cysteine S-methyltransferase [EC:2.1.1.63]
279	K00568	-2.95466	-3.93137	-2.46178	1.60355	4.18362	0.321238	0.329143	0.140888	0.22636	0.0974377	0.167596	ubiG; 2-polyprenyl-6-hydroxyphenyl methylase / 3-demethylubiquinone-9 3-methyltransferase [EC:2.1.1.222 2.1.1.64]
280	K00571	5.8306	5.99285	5.47695	-0.55435	0.798614	-0.686724	0.232505	0.00264313	0.0174036	0.00812471	0.0335617	E2.1.1.72; site-specific DNA-methyltransferase (adenine-specific) [EC:2.1.1.72]
281	K00573	-1.94417	-2.03433	-1.85092	0.130795	2.60473	0.0381845	0.475864	0.555443	0.662811	0.778219	0.843318	E2.1.1.77, pcm; protein-L-isoaspartate(D-aspartate) O-methyltransferase [EC:2.1.1.77]
282	K00574	3.57417	3.6539	3.53747	-0.204011	0.954228	-0.189015	0.418	0.505103	0.620849	0.43669	0.550373	cfa; cyclopropane-fatty-acyl-phospholipid synthase [EC:2.1.1.79]
283	K00575	3.76303	4.09025	3.5844	-0.540986	0.850051	-0.649354	0.234	0.00566372	0.0244003	0.00784417	0.0330273	cheR; chemotaxis protein methyltransferase CheR [EC:2.1.1.80]
284	K00588	-9.89597	-9.06407	-10.4339	-1.49082	5.57486	-0.245053	0.374571	0.332294	0.418158	0.33685	0.41771	E2.1.1.104; caffeoyl-CoA O-methyltransferase [EC:2.1.1.104]
285	K00590	-5.24922	-4.84429	-5.26313	-0.193536	8.47676	-0.0220769	0.490717	0.758868	0.824095	0.834185	0.883096	E2.1.1.113; site-specific DNA-methyltransferase (cytosine-N4-specific) [EC:2.1.1.113]
286	K00595	5.11756	5.50845	4.57151	-0.97951	0.87329	-1.02737	0.125393	0.000120938	0.0173517	0.000134388	0.017775	cobL; precorrin-6Y C5,15-methyltransferase (decarboxylating) [EC:2.1.1.132]
287	K00598	-1.60482	-1.86748	-1.41092	0.361964	2.13833	0.15907	0.423879	0.692214	0.777883	0.465012	0.576623	tam; trans-aconitate 2-methyltransferase [EC:2.1.1.144]
288	K00600	6.20594	6.2964	5.82414	-0.682326	0.841003	-0.76229	0.188571	0.00167547	0.0173533	0.00232932	0.0242985	glyA, SHMT; glycine hydroxymethyltransferase [EC:2.1.2.1]
289	K00602	6.47347	6.63604	6.19079	-0.63825	0.852834	-0.69085	0.211083	0.00255402	0.0173581	0.0049415	0.0277202	purH; phosphoribosylaminoimidazolecarboxamide formyltransferase / IMP cyclohydrolase [EC:2.1.2.3 3.5.4.10]
290	K00603	3.26244	4.25901	3.20066	-0.779857	1.8196	-0.436042	0.319909	0.103124	0.181148	0.0975759	0.168154	fctD; glutamate formiminotransferase [EC:2.1.2.5]
291	K00604	6.26862	6.36786	5.88182	-0.668607	0.850094	-0.745336	0.21451	0.00246385	0.0173553	0.00516663	0.0278954	MTFMT, fmt; methionyl-tRNA formyltransferase [EC:2.1.2.9]
292	K00605	4.10744	4.52383	3.87801	-0.681372	1.05293	-0.574296	0.248	0.00499109	0.0225679	0.0175348	0.053164	gcvT, AMT; aminomethyltransferase [EC:2.1.2.10]
293	K00606	4.93507	5.32627	4.70003	-0.5873	0.993621	-0.542799	0.227143	0.00595626	0.0252122	0.00836559	0.0341166	panB; 3-methyl-2-oxobutanoate hydroxymethyltransferase [EC:2.1.2.11]
294	K00609	6.22701	6.37133	5.86098	-0.595152	0.852186	-0.701417	0.22	0.00327227	0.0182103	0.00625283	0.029591	pyrB, PYR2; aspartate carbamoyltransferase catalytic subunit [EC:2.1.3.2]
295	K00610	5.61909	5.75794	5.41983	-0.6202	0.891018	-0.674472	0.251357	0.00368064	0.0191926	0.0144328	0.0475602	pyrI; aspartate carbamoyltransferase regulatory subunit
296	K00611	5.55858	5.93781	5.00671	-0.739986	0.775262	-0.917741	0.181377	0.000554756	0.0173517	0.00136842	0.0214408	OTC, argF, argI; ornithine carbamoyltransferase [EC:2.1.3.3]
297	K00612	-8.19898	-5.45418	-9.28707	-2.61429	6.38007	-0.372383	0.342286	0.244836	0.334237	0.167039	0.246733	E2.1.3.-; carbamoyltransferase [EC:2.1.3.-]
298	K00613	-3.14215	-2.7711	-3.44015	-0.797811	2.37587	-0.213566	0.300571	0.244688	0.343149	0.0696582	0.128478	GATM; glycine amidinotransferase [EC:2.1.4.1]
299	K00615	7.44484	7.69207	7.03362	-0.774409	0.810998	-0.903021	0.148529	0.000388035	0.0173517	0.000391976	0.0178283	E2.2.1.1, tktA, tktB; transketolase [EC:2.2.1.1]
300	K00616	5.77031	6.06792	5.52015	-0.588094	0.777135	-0.784164	0.180805	0.00114359	0.0173525	0.00127507	0.0209793	E2.2.1.2, talA, talB; transaldolase [EC:2.2.1.2]
301	K00619	-1.59689	-1.13016	-2.57233	-2.59209	7.25982	-0.412598	0.309911	0.0242014	0.0611351	0.0702593	0.130044	argA; amino-acid N-acetyltransferase [EC:2.3.1.1]
302	K00620	5.46795	5.8833	4.91424	-0.843099	0.856307	-0.911826	0.171143	0.000429321	0.0173517	0.00103469	0.019837	argJ; glutamate N-acetyltransferase / amino-acid N-acetyltransferase [EC:2.3.1.35 2.3.1.1]
303	K00625	5.77965	5.97694	5.24012	-0.635161	0.842707	-0.713504	0.228571	0.00173349	0.0173533	0.00622192	0.0297424	E2.3.1.8, pta; phosphate acetyltransferase [EC:2.3.1.8]
304	K00626	4.36791	4.83079	3.90903	-0.733743	0.757731	-0.859832	0.181429	0.00575156	0.0246367	0.00167457	0.0226934	E2.3.1.9, atoB; acetyl-CoA C-acetyltransferase [EC:2.3.1.9]
305	K00627	1.26399	1.15151	1.39611	0.254669	1.23531	0.194765	0.4	0.315224	0.43306	0.352895	0.465406	DLAT, aceF, pdhC; pyruvate dehydrogenase E2 component (dihydrolipoamide acetyltransferase) [EC:2.3.1.12]
306	K00631	-2.20943	-2.99813	-0.768286	2.3515	2.45904	0.910775	0.15567	0.00107885	0.0174242	0.000557409	0.0182021	plsB; glycerol-3-phosphate O-acyltransferase [EC:2.3.1.15]
307	K00632	-0.451245	-0.369503	-0.584205	-0.146341	1.58787	-0.0778192	0.459583	0.602781	0.705531	0.680379	0.767288	fadA, fadI; acetyl-CoA acyltransferase [EC:2.3.1.16]
308	K00633	3.44835	3.64643	2.58593	-1.05012	1.30588	-0.700961	0.27992	0.00340916	0.0185805	0.0311251	0.0746758	lacA; galactoside O-acetyltransferase [EC:2.3.1.18]
309	K00634	4.01666	4.42606	3.92519	-0.529487	1.2919	-0.37462	0.333905	0.083254	0.154119	0.117686	0.195098	ptb; phosphate butyryltransferase [EC:2.3.1.19]
310	K00638	-3.63282	-3.75577	-3.49341	0.359679	6.24862	0.0496884	0.467866	0.751062	0.818104	0.763073	0.829919	catB; chloramphenicol O-acetyltransferase type B [EC:2.3.1.28]
311	K00639	4.43444	4.74628	4.06092	-0.660727	1.10893	-0.586626	0.251714	0.00710718	0.0283027	0.0196317	0.0570744	kbl, GCAT; glycine C-acetyltransferase [EC:2.3.1.29]
312	K00640	6.2269	6.49192	5.68723	-0.695997	0.917459	-0.770417	0.188232	0.00210588	0.0173543	0.00248463	0.0245013	cysE; serine O-acetyltransferase [EC:2.3.1.30]
313	K00641	-0.281922	1.09908	-0.836516	-1.6097	3.4715	-0.388352	0.257355	0.100456	0.176144	0.0183027	0.0549189	metX; homoserine O-acetyltransferase/O-succinyltransferase [EC:2.3.1.31 2.3.1.46]
314	K00645	6.02578	6.24351	5.74256	-0.606403	0.838069	-0.708847	0.222222	0.00427402	0.0206867	0.00632949	0.0298386	fabD; [acyl-carrier-protein] S-malonyltransferase [EC:2.3.1.39]
315	K00646	-10.2365	-10.0701	-10.3877	-0.157697	4.52004	-0.0285371	0.485143	0.528901	0.612876	0.537922	0.619281	pksF; malonyl-ACP decarboxylase
316	K00647	3.18464	3.85028	2.94846	-1.2449	1.7369	-0.615883	0.228286	0.0120094	0.0399597	0.00773572	0.0328779	fabB; 3-oxoacyl-[acyl-carrier-protein] synthase I [EC:2.3.1.41]
317	K00648	6.10281	6.37973	5.70879	-0.627163	0.83667	-0.652618	0.229714	0.00899617	0.0331646	0.00850283	0.0343744	fabH; 3-oxoacyl-[acyl-carrier-protein] synthase III [EC:2.3.1.180]
318	K00651	6.17813	6.29242	5.7461	-0.651429	0.860092	-0.772514	0.197429	0.00159758	0.017353	0.00256809	0.024768	metA; homoserine O-succinyltransferase/O-acetyltransferase [EC:2.3.1.46 2.3.1.31]
319	K00652	4.87402	5.29633	4.67933	-0.474616	1.43458	-0.317682	0.324	0.117973	0.200936	0.113407	0.189439	bioF; 8-amino-7-oxononanoate synthase [EC:2.3.1.47]
320	K00655	6.66219	6.81915	6.4695	-0.598487	0.89618	-0.646318	0.242286	0.00760692	0.0296105	0.0126025	0.0434943	plsC; 1-acyl-sn-glycerol-3-phosphate acyltransferase [EC:2.3.1.51]
321	K00656	7.13431	7.26741	6.86556	-0.688033	0.886899	-0.739286	0.224	0.00194129	0.0173535	0.00699365	0.03117	E2.3.1.54, pflD; formate C-acetyltransferase [EC:2.3.1.54]
322	K00657	4.21861	4.54308	3.97448	-0.524905	0.934478	-0.528317	0.278286	0.0110206	0.0377599	0.0300195	0.0731688	speG, SAT; diamine N-acetyltransferase [EC:2.3.1.57]
323	K00658	2.08827	2.1096	1.9755	-0.322317	1.5519	-0.194057	0.406857	0.395177	0.515943	0.376442	0.49039	DLST, sucB; 2-oxoglutarate dehydrogenase E2 component (dihydrolipoamide succinyltransferase) [EC:2.3.1.61]
324	K00661	6.45874	6.65448	6.28134	-0.550464	0.829494	-0.641341	0.260571	0.00501798	0.0226183	0.0174654	0.0531291	maa; maltose O-acetyltransferase [EC:2.3.1.79]
325	K00662	1.04942	0.961351	1.09092	0.0359639	2.07932	0.015009	0.488286	0.937908	0.958844	0.920606	0.947713	aacC; aminoglycoside 3-N-acetyltransferase [EC:2.3.1.81]
326	K00666	3.84846	4.24126	3.66998	-0.598171	1.25705	-0.466012	0.296	0.0298552	0.0752909	0.0561427	0.110084	K00666; fatty-acyl-CoA synthase [EC:6.2.1.-]
327	K00667	-10.3068	-10.0391	-10.4861	-0.353493	4.66551	-0.0625541	0.466286	0.521255	0.605739	0.506525	0.586129	FAS2; fatty acid synthase subunit alpha, fungi type [EC:2.3.1.86]
328	K00673	-3.24742	-4.58553	-2.43788	2.11727	4.13071	0.450576	0.288775	0.0676776	0.129054	0.0355536	0.0808528	astA; arginine N-succinyltransferase [EC:2.3.1.109]
329	K00674	3.8558	4.04319	3.53964	-0.438942	0.867788	-0.463225	0.288203	0.0353503	0.0844277	0.0432117	0.091831	dapD; 2,3,4,5-tetrahydropyridine-2,6-dicarboxylate N-succinyltransferase [EC:2.3.1.117]
330	K00675	-1.81809	-2.20362	-0.858149	1.58622	2.76366	0.489961	0.26878	0.0636239	0.125482	0.0263805	0.0671104	nhoA; N-hydroxyarylamine O-acetyltransferase [EC:2.3.1.118]
331	K00677	5.2286	5.4148	4.92467	-0.549831	1.07218	-0.400009	0.306769	0.0164902	0.0494402	0.0635032	0.12054	lpxA; UDP-N-acetylglucosamine acyltransferase [EC:2.3.1.129]
332	K00680	3.18328	3.76263	2.7046	-0.849225	1.63603	-0.459955	0.333619	0.155372	0.248459	0.117098	0.194306	ytmI; uncharacterized N-acetyltransferase [EC:2.3.1.-]
333	K00681	0.822175	0.403294	1.2372	0.562177	2.03187	0.241121	0.41988	0.368227	0.488569	0.452215	0.566271	ggt; gamma-glutamyltranspeptidase / glutathione hydrolase [EC:2.3.2.2 3.4.19.13]
334	K00684	2.67189	3.54026	2.10655	-1.61747	1.72328	-0.78896	0.152242	0.00123019	0.017353	0.000441798	0.0178414	aat; leucyl/phenylalanyl-tRNA---protein transferase [EC:2.3.2.6]
335	K00685	-2.51052	-2.69584	-1.8148	0.544065	7.36658	0.0795617	0.451429	0.804712	0.861004	0.639835	0.732979	ATE1; arginyl-tRNA---protein transferase [EC:2.3.2.8]
336	K00686	-5.55117	-5.11304	-6.1649	-1.34052	2.91866	-0.404699	0.289429	0.0213258	0.0564537	0.0606007	0.113133	tgl; protein-glutamine gamma-glutamyltransferase [EC:2.3.2.13]
337	K00687	-1.72803	-1.90828	-1.61393	0.0812653	2.94871	0.0207376	0.489003	0.721876	0.799416	0.916809	0.944792	pbp2B, penA; penicillin-binding protein 2B
338	K00688	6.74198	6.97855	6.45533	-0.678841	0.833303	-0.813132	0.199086	0.00117349	0.0173525	0.00258977	0.0248638	PYG, glgP; glycogen phosphorylase [EC:2.4.1.1]
339	K00689	-1.24191	-1.10926	-1.37522	-0.095236	2.83031	-0.0246034	0.485429	0.755066	0.825345	0.85174	0.899176	E2.4.1.5; dextransucrase [EC:2.4.1.5]
340	K00690	4.71724	4.83454	4.47702	-0.481877	0.881462	-0.535433	0.257355	0.0100374	0.035565	0.0161792	0.0508599	E2.4.1.7; sucrose phosphorylase [EC:2.4.1.7]
341	K00691	2.22371	2.42109	2.05605	-0.193992	2.14904	-0.0850373	0.460154	0.918449	0.946006	0.669393	0.760929	mapA; maltose phosphorylase [EC:2.4.1.8]
342	K00692	-3.41347	-3.21629	-3.59891	0.0793801	3.1134	0.0195452	0.488857	0.824233	0.875671	0.891358	0.92649	sacB; levansucrase [EC:2.4.1.10]
343	K00694	0.159179	-0.18674	0.40679	0.559586	1.39192	0.356291	0.337047	0.082208	0.152555	0.122082	0.200683	bcsA; cellulose synthase (UDP-forming) [EC:2.4.1.12]
344	K00697	-3.46217	-4.33622	-2.54569	1.92092	3.82816	0.43977	0.293714	0.100923	0.174495	0.048566	0.0993798	otsA; trehalose 6-phosphate synthase [EC:2.4.1.15 2.4.1.347]
345	K00700	6.5998	6.78602	6.32728	-0.613006	0.875435	-0.7151	0.215081	0.00292737	0.0175627	0.0040279	0.0266251	GBE1, glgB; 1,4-alpha-glucan branching enzyme [EC:2.4.1.18]
346	K00702	2.84063	3.74698	2.30304	-1.23687	1.56966	-0.756308	0.198286	0.0134553	0.0429998	0.00308284	0.0254475	E2.4.1.20; cellobiose phosphorylase [EC:2.4.1.20]
347	K00703	6.21434	6.38599	5.96099	-0.657868	0.906413	-0.692369	0.217429	0.00276974	0.0174287	0.00487294	0.0275866	glgA; starch synthase [EC:2.4.1.21]
348	K00705	6.67996	6.84501	6.45251	-0.635278	0.906908	-0.685258	0.221714	0.00372985	0.0193074	0.0069869	0.0311379	malQ; 4-alpha-glucanotransferase [EC:2.4.1.25]
349	K00709	-8.47132	-7.69638	-9.06263	-1.61871	8.05422	-0.183704	0.403313	0.475258	0.570761	0.418874	0.511821	ABO; histo-blood group ABO system transferase [EC:2.4.1.40 2.4.1.37]
350	K00712	-2.24645	-2.3499	-2.11091	0.679901	3.96471	0.161271	0.410857	0.507171	0.615087	0.419217	0.531984	tagE; poly(glycerol-phosphate) alpha-glucosyltransferase [EC:2.4.1.52]
351	K00713	-4.56584	-4.89007	-3.52924	1.36915	4.68984	0.249971	0.385143	0.313993	0.42083	0.273956	0.37907	waaD; UDP-glucose:(glucosyl)LPS alpha-1,2-glucosyltransferase [EC:2.4.1.-]
352	K00720	-10.346	-9.76267	-10.723	-1.03977	4.45584	-0.200371	0.392571	0.387647	0.468152	0.38521	0.464171	UGCG; ceramide glucosyltransferase [EC:2.4.1.80]
353	K00721	5.13931	5.3611	4.78077	-0.647114	0.971476	-0.618446	0.229077	0.00246422	0.0173605	0.00744065	0.0321032	DPM1; dolichol-phosphate mannosyltransferase [EC:2.4.1.83]
354	K00728	-9.16237	-7.13297	-10.1031	-3.34005	5.76059	-0.519482	0.274857	0.0786141	0.13211	0.0707462	0.121476	POMT, pmt; dolichyl-phosphate-mannose-protein mannosyltransferase [EC:2.4.1.109]
355	K00737	-9.67885	-9.53769	-9.79518	-0.116666	5.44692	-0.0203489	0.487861	0.594487	0.677113	0.608348	0.687778	MGAT3; beta-1,4-mannosyl-glycoprotein beta-1,4-N-acetylglucosaminyltransferase [EC:2.4.1.144]
356	K00743	-10.3671	-10.0292	-10.612	-0.498689	4.6392	-0.0962469	0.452157	0.509895	0.594158	0.484938	0.565417	GGTA1; N-acetyllactosaminide 3-alpha-galactosyltransferase [EC:2.4.1.87]
357	K00748	4.36064	4.60109	4.10284	-0.544415	1.03198	-0.475564	0.278777	0.0125209	0.0411009	0.0316631	0.0755587	lpxB; lipid-A-disaccharide synthase [EC:2.4.1.182]
358	K00752	-4.77105	-3.2759	-7.79746	-2.80852	7.60087	-0.366238	0.341045	0.134425	0.214265	0.131482	0.210329	hasA; hyaluronan synthase [EC:2.4.1.212]
359	K00754	3.21215	3.62669	2.49199	-0.822124	1.47744	-0.426166	0.308769	0.0380422	0.0888616	0.0663144	0.124558	bshA; L-malate glycosyltransferase [EC:2.4.1.-]
360	K00756	4.72825	4.85841	4.60032	-0.429683	0.755421	-0.502887	0.260857	0.0866323	0.158716	0.0186142	0.0550513	pdp; pyrimidine-nucleoside phosphorylase [EC:2.4.2.2]
361	K00757	5.65498	5.81892	5.02258	-0.677958	0.913689	-0.69254	0.220223	0.00331444	0.0183125	0.00577979	0.0289879	udp, UPP; uridine phosphorylase [EC:2.4.2.3]
362	K00758	-3.30819	-4.33981	-2.49835	2.05983	3.21008	0.546598	0.258286	0.0693811	0.130261	0.0214065	0.0592725	deoA, TYMP; thymidine phosphorylase [EC:2.4.2.4]
363	K00759	6.00196	6.16197	5.65112	-0.48618	0.803343	-0.584607	0.263925	0.010792	0.0372477	0.0200767	0.0578404	APRT, apt; adenine phosphoribosyltransferase [EC:2.4.2.7]
364	K00760	6.24706	6.37055	6.00999	-0.599097	0.853537	-0.701121	0.210571	0.00358561	0.0189522	0.00500954	0.0277961	hprT, hpt, HPRT1; hypoxanthine phosphoribosyltransferase [EC:2.4.2.8]
365	K00761	6.19245	6.32451	5.82786	-0.639785	0.846571	-0.711972	0.222286	0.00367238	0.0191709	0.00716755	0.0313989	upp, UPRT; uracil phosphoribosyltransferase [EC:2.4.2.9]
366	K00762	6.53759	6.70617	6.11588	-0.692112	0.880567	-0.767443	0.205143	0.00224619	0.0173544	0.0037428	0.0262771	pyrE; orotate phosphoribosyltransferase [EC:2.4.2.10]
367	K00763	6.01899	6.24303	5.72462	-0.565212	0.891561	-0.587375	0.281714	0.013419	0.0430517	0.0307601	0.0742545	pncB, NAPRT1; nicotinate phosphoribosyltransferase [EC:6.3.4.21]
368	K00764	6.73158	6.90684	6.41767	-0.643357	0.845976	-0.706732	0.213653	0.00198502	0.0173543	0.00458207	0.0272348	purF, PPAT; amidophosphoribosyltransferase [EC:2.4.2.14]
369	K00765	6.08197	6.23663	5.74962	-0.695592	0.886399	-0.753363	0.208	0.00189094	0.0173536	0.00367819	0.0262047	hisG; ATP phosphoribosyltransferase [EC:2.4.2.17]
370	K00766	5.54879	5.79048	5.1688	-0.666595	0.877107	-0.747522	0.225935	0.00206149	0.0173543	0.0076114	0.0324742	trpD; anthranilate phosphoribosyltransferase [EC:2.4.2.18]
371	K00767	5.72441	5.94236	5.15821	-0.797021	0.880345	-0.902521	0.179714	0.000255531	0.0173517	0.00161436	0.0223992	nadC, QPRT; nicotinate-nucleotide pyrophosphorylase (carboxylating) [EC:2.4.2.19]
372	K00768	5.70124	5.8504	5.20373	-0.652093	0.831188	-0.75915	0.196857	0.00144622	0.0173527	0.003308	0.0257688	E2.4.2.21, cobU, cobT; nicotinate-nucleotide--dimethylbenzimidazole phosphoribosyltransferase [EC:2.4.2.21]
373	K00769	-0.613659	-0.784122	-0.530985	0.227198	1.72599	0.115914	0.444	0.805735	0.864754	0.627331	0.723608	gpt; xanthine phosphoribosyltransferase [EC:2.4.2.22]
374	K00772	0.827595	1.08812	0.691248	-0.513618	1.82228	-0.268171	0.365039	0.210166	0.314847	0.184	0.278921	mtaP, MTAP; 5'-methylthioadenosine phosphorylase [EC:2.4.2.28]
375	K00773	6.22527	6.36114	5.8776	-0.62916	0.85138	-0.743323	0.200229	0.00203288	0.0173539	0.0029023	0.0253307	tgt, QTRT1; queuine tRNA-ribosyltransferase [EC:2.4.2.29]
376	K00782	3.93296	4.11542	3.89843	-0.472819	1.30783	-0.357983	0.336	0.0760579	0.144263	0.117698	0.195045	lldG; L-lactate dehydrogenase complex protein LldG
377	K00783	6.27715	6.4191	5.9848	-0.596446	0.83893	-0.706926	0.211939	0.00205965	0.0173539	0.00416313	0.0267946	rlmH; 23S rRNA (pseudouridine1915-N3)-methyltransferase [EC:2.1.1.177]
378	K00784	6.133	6.4055	5.99805	-0.597035	0.924788	-0.649528	0.251357	0.00428346	0.0206986	0.0175512	0.0531949	rnz; ribonuclease Z [EC:3.1.26.11]
379	K00786	0.796159	1.27927	0.665301	-0.3734	1.56169	-0.234161	0.398743	0.329177	0.44785	0.352533	0.465677	E2.4.-.-; glycosyltransferase [EC:2.4.-.-]
380	K00788	6.50956	6.76024	6.13418	-0.664027	0.84872	-0.742029	0.199143	0.00123936	0.0173527	0.00305821	0.0254899	thiE; thiamine-phosphate pyrophosphorylase [EC:2.5.1.3]
381	K00789	6.32867	6.54173	6.03644	-0.621937	0.821595	-0.722783	0.214796	0.00262978	0.0173761	0.00462403	0.0273106	metK; S-adenosylmethionine synthetase [EC:2.5.1.6]
382	K00790	6.65454	6.9191	6.35358	-0.577444	0.822671	-0.707338	0.210571	0.00505221	0.0227136	0.00407595	0.0266537	murA; UDP-N-acetylglucosamine 1-carboxyvinyltransferase [EC:2.5.1.7]
383	K00791	6.50442	6.66096	6.18391	-0.621028	0.846451	-0.670056	0.233648	0.00300421	0.0176779	0.00957822	0.0367211	miaA, TRIT1; tRNA dimethylallyltransferase [EC:2.5.1.75]
384	K00793	5.40598	5.71632	5.10643	-0.595271	0.864581	-0.653696	0.212857	0.00254574	0.0173738	0.00386127	0.0264027	ribE, RIB5; riboflavin synthase [EC:2.5.1.9]
385	K00794	5.45375	5.71974	5.10866	-0.575964	0.850088	-0.649501	0.217429	0.00322649	0.0181206	0.00630991	0.0299429	ribH, RIB4; 6,7-dimethyl-8-ribityllumazine synthase [EC:2.5.1.78]
386	K00795	0.324885	-0.247613	0.57678	0.779898	1.33609	0.545337	0.272779	0.0268193	0.0692923	0.029909	0.0728166	ispA; farnesyl diphosphate synthase [EC:2.5.1.1 2.5.1.10]
387	K00796	5.59369	5.85794	5.28727	-0.687161	0.916703	-0.724575	0.21	0.00131957	0.0173527	0.00512404	0.0279569	folP; dihydropteroate synthase [EC:2.5.1.15]
388	K00797	4.90546	5.29751	4.78826	-0.552644	0.89404	-0.641379	0.24593	0.0155491	0.047497	0.013048	0.0444353	speE, SRM; spermidine synthase [EC:2.5.1.16]
389	K00798	4.10417	4.4783	3.93659	-0.609449	1.20857	-0.460504	0.295915	0.0209461	0.0584378	0.046762	0.0967863	MMAB, pduO; cob(I)alamin adenosyltransferase [EC:2.5.1.17]
390	K00799	-0.423337	-1.43358	0.0438167	1.69851	2.39325	0.637297	0.240286	0.0134698	0.0429876	0.00984026	0.0375709	GST, gst; glutathione S-transferase [EC:2.5.1.18]
391	K00800	6.21584	6.36131	5.87934	-0.645754	0.862015	-0.754166	0.191143	0.00173173	0.0173533	0.00224981	0.0242779	aroA; 3-phosphoshikimate 1-carboxyvinyltransferase [EC:2.5.1.19]
392	K00801	-10.1443	-9.20502	-10.6871	-1.99925	6.05842	-0.318543	0.335714	0.169595	0.23948	0.220027	0.291898	FDFT1; farnesyl-diphosphate farnesyltransferase [EC:2.5.1.21]
393	K00803	-5.79221	-4.73411	-8.07104	-2.58307	5.43072	-0.41105	0.333333	0.092641	0.156379	0.122768	0.198672	AGPS, agpS; alkyldihydroxyacetonephosphate synthase [EC:2.5.1.26]
394	K00805	5.56979	5.83241	5.30694	-0.622805	0.831685	-0.673337	0.207429	0.0146062	0.0455556	0.00343291	0.0259514	hepST; heptaprenyl diphosphate synthase [EC:2.5.1.30]
395	K00806	6.27229	6.40089	6.01514	-0.60977	0.832445	-0.71598	0.21651	0.00317838	0.0180068	0.00495138	0.0276338	uppS; undecaprenyl diphosphate synthase [EC:2.5.1.31]
396	K00809	-7.0429	-2.34007	-9.28133	-4.93806	7.42058	-0.61469	0.241074	0.0376103	0.0772824	0.0175798	0.0500293	DHPS, dys; deoxyhypusine synthase [EC:2.5.1.46]
397	K00812	5.33575	5.5478	5.04831	-0.439981	0.974777	-0.404424	0.28649	0.014182	0.0446905	0.0377988	0.0842491	aspB; aspartate aminotransferase [EC:2.6.1.1]
398	K00813	0.792822	0.378978	1.24937	1.18255	2.32086	0.533752	0.298486	0.043486	0.097418	0.0537322	0.106691	aspC; aspartate aminotransferase [EC:2.6.1.1]
399	K00817	6.29814	6.45086	5.86908	-0.683881	0.838188	-0.786326	0.185143	0.00131189	0.0173527	0.00169588	0.0227093	hisC; histidinol-phosphate aminotransferase [EC:2.6.1.9]
400	K00818	4.62177	4.78995	4.3751	-0.608622	1.02922	-0.595473	0.238503	0.00394141	0.0198396	0.0109218	0.0398233	E2.6.1.11, argD; acetylornithine aminotransferase [EC:2.6.1.11]
401	K00819	0.177996	1.27949	-0.334568	-2.40106	4.26379	-0.54315	0.197087	0.00274112	0.0182531	0.00312001	0.025511	rocD, OAT; ornithine--oxo-acid transaminase [EC:2.6.1.13]
402	K00820	6.31996	6.45464	6.05611	-0.663629	0.855418	-0.760243	0.192857	0.00203972	0.017354	0.00316095	0.0256779	glmS, GFPT; glucosamine---fructose-6-phosphate aminotransferase (isomerizing) [EC:2.6.1.16]
403	K00821	5.33509	5.72799	4.87522	-0.79716	0.769923	-0.937731	0.159954	0.000426069	0.0173517	0.000628446	0.0181972	argD; acetylornithine/N-succinyldiaminopimelate aminotransferase [EC:2.6.1.11 2.6.1.17]
404	K00823	-1.15689	-1.68068	-0.980721	0.611385	3.41559	0.179901	0.427878	0.575057	0.683053	0.47799	0.590023	puuE; 4-aminobutyrate aminotransferase [EC:2.6.1.19]
405	K00824	0.848773	0.791429	0.884474	-0.0520497	2.17038	-0.0248486	0.489003	0.81187	0.870486	0.936179	0.958293	dat; D-alanine transaminase [EC:2.6.1.21]
406	K00826	6.23166	6.3499	5.88537	-0.636778	0.874635	-0.713139	0.191714	0.00247506	0.0173566	0.00246196	0.0245956	E2.6.1.42, ilvE; branched-chain amino acid aminotransferase [EC:2.6.1.42]
407	K00830	-10.2643	-9.80699	-10.5622	-0.74024	5.24869	-0.122545	0.433305	0.479436	0.564973	0.461723	0.542704	AGXT; alanine-glyoxylate transaminase / serine-glyoxylate transaminase / serine-pyruvate transaminase [EC:2.6.1.44 2.6.1.45 2.6.1.51]
408	K00831	6.17341	6.32296	5.76882	-0.711813	0.869342	-0.813608	0.190286	0.00116465	0.0173525	0.00203522	0.0238158	serC, PSAT1; phosphoserine aminotransferase [EC:2.6.1.52]
409	K00832	2.19034	1.94099	2.23321	0.268963	1.59325	0.14486	0.448443	0.826233	0.881153	0.631894	0.729767	tyrB; aromatic-amino-acid transaminase [EC:2.6.1.57]
410	K00833	4.60142	5.07414	4.27538	-0.75783	1.27176	-0.57575	0.247644	0.00983169	0.0351237	0.0130495	0.0446086	bioA; adenosylmethionine---8-amino-7-oxononanoate aminotransferase [EC:2.6.1.62]
411	K00835	-3.08374	-4.28332	-2.51817	1.62299	4.42888	0.327085	0.362	0.164328	0.255991	0.186859	0.28215	avtA; valine--pyruvate aminotransferase [EC:2.6.1.66]
412	K00836	-2.17517	-3.06512	-1.48067	1.96415	7.07534	0.238877	0.392286	0.216076	0.317701	0.325034	0.436332	ectB, dat; diaminobutyrate-2-oxoglutarate transaminase [EC:2.6.1.76]
413	K00839	-8.18029	-9.2489	-6.70654	2.41448	5.85878	0.366264	0.337143	0.148615	0.223828	0.148955	0.224551	pucG; (S)-ureidoglycine---glyoxylate transaminase [EC:2.6.1.112]
414	K00840	-3.25732	-4.57119	-2.44364	2.13756	4.15624	0.439123	0.278	0.0715245	0.134342	0.0360343	0.081519	astC; succinylornithine aminotransferase [EC:2.6.1.81]
415	K00841	1.37782	2.00855	0.465498	-0.535934	2.45833	-0.234983	0.424	0.548076	0.660029	0.521225	0.632868	patA; aminotransferase [EC:2.6.1.-]
416	K00842	-5.19501	-4.87109	-5.19548	-0.0640879	7.76055	-0.00832212	0.49643	0.730724	0.800811	0.815445	0.869162	E2.6.1.-E, patB; aminotransferase [EC:2.6.1.-]
417	K00844	0.656829	1.08939	-0.028252	-1.10719	2.09025	-0.41333	0.272779	0.0943602	0.169153	0.0301028	0.0734228	HK; hexokinase [EC:2.7.1.1]
418	K00845	6.82102	6.93294	6.48971	-0.514912	0.931104	-0.579815	0.246571	0.0104227	0.0364364	0.0138802	0.046116	glk; glucokinase [EC:2.7.1.2]
419	K00847	6.47814	6.67698	6.18897	-0.625636	0.820308	-0.764776	0.220508	0.00146096	0.017353	0.00562689	0.0286114	E2.7.1.4, scrK; fructokinase [EC:2.7.1.4]
420	K00848	5.10902	5.36105	4.59789	-0.647156	0.8688	-0.651715	0.249072	0.00538764	0.0236487	0.015906	0.0502406	rhaB; rhamnulokinase [EC:2.7.1.5]
421	K00849	6.16559	6.2554	5.81681	-0.565717	0.850745	-0.692577	0.222286	0.00335057	0.0183878	0.00654001	0.0302292	galK; galactokinase [EC:2.7.1.6]
422	K00850	7.53904	7.74089	7.26535	-0.6231	0.917172	-0.642017	0.241714	0.00564882	0.0243667	0.0121739	0.0424923	pfkA, PFK; 6-phosphofructokinase 1 [EC:2.7.1.11]
423	K00851	3.33043	3.65797	2.44651	-1.05969	1.48603	-0.631752	0.241645	0.00735211	0.0289643	0.0123995	0.043181	E2.7.1.12, gntK, idnK; gluconokinase [EC:2.7.1.12]
424	K00852	5.63636	5.82043	4.88812	-0.847135	0.873151	-0.933788	0.169095	0.000342801	0.0173517	0.0010513	0.0199885	rbsK, RBKS; ribokinase [EC:2.7.1.15]
425	K00853	1.16237	1.79781	0.819987	-0.954833	2.81662	-0.308095	0.358857	0.149997	0.241737	0.190071	0.286869	araB; L-ribulokinase [EC:2.7.1.16]
426	K00854	6.39434	6.52451	5.97095	-0.630391	0.828371	-0.774268	0.189374	0.000985236	0.0173525	0.00215002	0.0239389	xylB, XYLB; xylulokinase [EC:2.7.1.17]
427	K00855	-3.31538	-4.57341	-2.52448	2.26881	4.10634	0.487705	0.267429	0.0597071	0.118005	0.0299039	0.0725852	PRK, prkB; phosphoribulokinase [EC:2.7.1.19]
428	K00856	-1.91864	-0.573805	-2.36737	-1.64509	2.77137	-0.543543	0.259429	0.0145744	0.0453069	0.0196615	0.0566943	E2.7.1.20, ADK; adenosine kinase [EC:2.7.1.20]
429	K00857	5.11897	5.19194	4.98668	-0.252433	0.944191	-0.252672	0.378	0.189714	0.290548	0.238017	0.342365	tdk, TK; thymidine kinase [EC:2.7.1.21]
430	K00858	6.24944	6.35994	5.87665	-0.615442	0.860342	-0.711134	0.214	0.002612	0.017367	0.00547378	0.0282197	ppnK, NADK; NAD+ kinase [EC:2.7.1.23]
431	K00859	6.25038	6.33892	5.98198	-0.635089	0.877261	-0.720299	0.22565	0.00280971	0.0174682	0.00654858	0.0301261	coaE; dephospho-CoA kinase [EC:2.7.1.24]
432	K00860	3.85255	4.27251	3.64623	-0.525029	1.44399	-0.33806	0.313339	0.0856512	0.157408	0.0905245	0.158515	cysC; adenylylsulfate kinase [EC:2.7.1.25]
433	K00862	-9.67643	-8.89714	-10.1731	-1.52448	5.25678	-0.247109	0.376464	0.332273	0.417734	0.324188	0.40566	eryA; erythritol kinase (D-erythritol 1-phosphate-forming) [EC:2.7.1.215]
434	K00863	0.522049	0.246527	0.727551	0.120026	2.19426	0.0462705	0.483576	0.920937	0.947052	0.857581	0.90443	DAK, TKFC; triose/dihydroxyacetone kinase / FAD-AMP lyase (cyclizing) [EC:2.7.1.28 2.7.1.29 4.6.1.15]
435	K00864	5.68929	6.06689	5.49632	-0.635504	0.716054	-0.853889	0.185661	0.00165586	0.0173533	0.00164379	0.0225779	glpK, GK; glycerol kinase [EC:2.7.1.30]
436	K00865	5.73859	5.99217	5.4836	-0.671976	0.798254	-0.774858	0.195714	0.00116813	0.0173525	0.00245319	0.0246109	glxK, garK; glycerate 2-kinase [EC:2.7.1.165]
437	K00867	0.33607	0.114416	0.449643	0.838275	2.44167	0.319138	0.362182	0.173037	0.270207	0.20999	0.310463	coaA; type I pantothenate kinase [EC:2.7.1.33]
438	K00868	6.14994	6.28459	5.84008	-0.640802	0.797208	-0.780617	0.195714	0.00139908	0.0173527	0.00273319	0.024983	pdxK, pdxY; pyridoxine kinase [EC:2.7.1.35]
439	K00869	-0.111026	0.259361	-0.140311	0.4155	2.99249	0.117012	0.454156	0.923528	0.948777	0.630462	0.728459	E2.7.1.36, MVK, mvaK1; mevalonate kinase [EC:2.7.1.36]
440	K00870	-10.2794	-9.57528	-10.765	-1.44991	5.13162	-0.242314	0.375321	0.281615	0.36152	0.310344	0.385372	E2.7.1.37; protein kinase [EC:2.7.1.37]
441	K00872	4.47657	5.01023	4.24151	-0.516714	0.936554	-0.516362	0.305341	0.0507002	0.10831	0.0627255	0.119419	thrB1; homoserine kinase [EC:2.7.1.39]
442	K00873	6.29898	6.4182	6.07682	-0.561805	0.845011	-0.692776	0.213714	0.00328594	0.0182392	0.00482014	0.0275423	PK, pyk; pyruvate kinase [EC:2.7.1.40]
443	K00874	6.1124	6.37007	5.81438	-0.519874	0.869569	-0.538899	0.273714	0.0110584	0.0378452	0.031253	0.0748932	kdgK; 2-dehydro-3-deoxygluconokinase [EC:2.7.1.45]
444	K00876	6.57078	6.76708	6.43042	-0.527055	0.86294	-0.586759	0.246501	0.00786098	0.0302835	0.0135823	0.045529	udk, UCK; uridine kinase [EC:2.7.1.48]
445	K00878	5.36523	5.81102	4.90458	-0.716813	0.812258	-0.883995	0.171429	0.000591573	0.0173517	0.00085125	0.0191385	thiM; hydroxyethylthiazole kinase [EC:2.7.1.50]
446	K00879	2.27312	3.00427	1.90869	-1.1044	1.17984	-0.883034	0.162239	0.000501713	0.0173517	0.000613734	0.0181751	fucK; L-fuculokinase [EC:2.7.1.51]
447	K00880	-1.16962	-1.97421	-0.387644	1.6167	1.87832	0.794805	0.19166	0.00275108	0.0182655	0.00226405	0.0237013	lyxK; L-xylulokinase [EC:2.7.1.53]
448	K00881	-3.8045	-4.47901	-2.45691	1.84613	4.37396	0.354951	0.334761	0.154346	0.24255	0.121308	0.198914	alsK; allose kinase [EC:2.7.1.55]
449	K00882	5.64766	5.87932	5.20903	-0.591708	0.797623	-0.71041	0.220223	0.0131609	0.0424923	0.00584845	0.0291271	fruK; 1-phosphofructokinase [EC:2.7.1.56]
450	K00883	-1.97248	-2.30184	-1.53278	0.987709	3.36198	0.250838	0.355041	0.130677	0.216886	0.170384	0.261488	dgoK; 2-dehydro-3-deoxygalactonokinase [EC:2.7.1.58]
451	K00884	-2.19971	-2.99641	-0.636546	2.41277	2.50438	0.934189	0.145673	0.000820654	0.0173802	0.000435905	0.0179778	NAGK, nagK; N-acetylglucosamine kinase [EC:2.7.1.59]
452	K00885	-2.33973	-3.2062	-0.785346	2.35447	2.49344	0.907366	0.162286	0.00105727	0.0174573	0.00074202	0.0188134	nanK; N-acylmannosamine kinase [EC:2.7.1.60]
453	K00886	2.64264	3.07024	2.12402	-1.1081	2.14626	-0.397589	0.284286	0.0213005	0.0591082	0.0412393	0.08906	ppgK; polyphosphate glucokinase [EC:2.7.1.63]
454	K00887	1.16194	0.0518313	1.48521	0.773056	2.42797	0.292604	0.393602	0.362487	0.482774	0.344245	0.457339	dgkA; undecaprenol kinase [EC:2.7.1.66]
455	K00891	6.379	6.6713	5.97946	-0.73173	0.804237	-0.853828	0.174522	0.000555383	0.0173517	0.00124115	0.0209356	E2.7.1.71, aroK, aroL; shikimate kinase [EC:2.7.1.71]
456	K00892	-3.31267	-4.58742	-2.52694	2.25442	4.12268	0.475326	0.274857	0.0601641	0.118448	0.0305123	0.073418	gsk; inosine kinase [EC:2.7.1.73]
457	K00895	4.08344	4.31405	3.82692	-0.458348	1.17107	-0.329064	0.321714	0.0332846	0.0811714	0.0862702	0.152623	pfp, PFP; diphosphate-dependent phosphofructokinase [EC:2.7.1.90]
458	K00897	-2.74818	-3.1974	-2.17275	0.771794	3.75815	0.161371	0.403028	0.487861	0.596531	0.349834	0.462083	aphA; kanamycin kinase [EC:2.7.1.95]
459	K00899	-1.64432	-1.23402	-2.04822	-0.634627	2.02421	-0.271316	0.38132	0.204182	0.306393	0.25537	0.360859	mtnK; 5-methylthioribose kinase [EC:2.7.1.100]
460	K00901	4.87628	5.07304	4.62734	-0.436161	0.975887	-0.412159	0.321714	0.0494424	0.106475	0.086388	0.152801	dgkA, DGK; diacylglycerol kinase (ATP) [EC:2.7.1.107]
461	K00906	-3.31388	-4.5934	-2.52511	2.25964	4.16725	0.47669	0.276778	0.0561029	0.113421	0.0296016	0.0721438	aceK; isocitrate dehydrogenase kinase/phosphatase [EC:2.7.11.5 3.1.3.-]
462	K00912	4.31286	4.51131	4.06563	-0.502804	1.02866	-0.41533	0.3	0.0175321	0.0515632	0.0641364	0.12143	lpxK; tetraacyldisaccharide 4'-kinase [EC:2.7.1.130]
463	K00917	1.49615	1.93601	1.0216	-0.812435	1.67132	-0.471407	0.28649	0.0525163	0.110857	0.03753	0.0838845	lacC; tagatose 6-phosphate kinase [EC:2.7.1.144]
464	K00918	-9.47274	-9.02692	-9.77053	-0.370267	6.08579	-0.0549297	0.472151	0.626596	0.70833	0.629999	0.707853	pfkC; ADP-dependent phosphofructokinase/glucokinase [EC:2.7.1.146 2.7.1.147]
465	K00919	6.21936	6.36066	5.86755	-0.638153	0.845709	-0.757872	0.196515	0.00216045	0.0173544	0.00258136	0.0248667	ispE; 4-diphosphocytidyl-2-C-methyl-D-erythritol kinase [EC:2.7.1.148]
466	K00924	-5.7899	-5.98265	-5.59765	1.70301	6.10978	0.260402	0.383319	0.223306	0.318951	0.286756	0.390572	E2.7.1.-; kinase [EC:2.7.1.-]
467	K00925	6.29465	6.38627	5.98345	-0.529591	0.858017	-0.647814	0.245073	0.0067359	0.0272981	0.011544	0.0410009	ackA; acetate kinase [EC:2.7.2.1]
468	K00926	5.25347	5.43054	4.68357	-0.732839	0.729063	-0.948917	0.166857	0.000319199	0.0173517	0.000841621	0.0191401	arcC; carbamate kinase [EC:2.7.2.2]
469	K00927	6.24093	6.35557	5.87581	-0.609265	0.85299	-0.735035	0.215367	0.00253837	0.0173634	0.00395207	0.0266158	PGK, pgk; phosphoglycerate kinase [EC:2.7.2.3]
470	K00928	6.77098	6.93996	6.37444	-0.648889	0.876792	-0.784928	0.211429	0.00127664	0.0173527	0.00463338	0.0273182	lysC; aspartate kinase [EC:2.7.2.4]
471	K00929	4.23851	4.51685	4.07462	-0.480325	1.22837	-0.371753	0.333905	0.0919938	0.16602	0.117462	0.194808	buk; butyrate kinase [EC:2.7.2.7]
472	K00930	5.94787	6.14717	5.50688	-0.722847	0.836228	-0.853624	0.188857	0.000477122	0.0173517	0.00192766	0.0234701	argB; acetylglutamate kinase [EC:2.7.2.8]
473	K00931	6.11664	6.26114	5.78812	-0.673168	0.86361	-0.755307	0.203143	0.00193965	0.0173538	0.00326958	0.0257698	proB; glutamate 5-kinase [EC:2.7.2.11]
474	K00932	-3.46996	-4.60605	-2.52497	2.21482	4.13589	0.46427	0.273714	0.0617977	0.121263	0.0322859	0.0760963	tdcD; propionate kinase [EC:2.7.2.15]
475	K00936	5.82635	5.93773	5.54284	-0.49547	0.877156	-0.549612	0.273065	0.0309972	0.077245	0.0285824	0.0710167	pdtaS; two-component system, sensor histidine kinase PdtaS [EC:2.7.13.3]
476	K00937	6.19808	6.36784	5.95956	-0.68038	0.881558	-0.750864	0.231648	0.00154641	0.0173528	0.00765688	0.0325209	ppk; polyphosphate kinase [EC:2.7.4.1]
477	K00938	-0.347734	-0.647802	-0.136538	0.415684	3.05547	0.117392	0.439714	0.825059	0.879339	0.574894	0.680156	E2.7.4.2, mvaK2; phosphomevalonate kinase [EC:2.7.4.2]
478	K00939	6.23147	6.36215	5.87858	-0.63284	0.861982	-0.737488	0.196	0.00222847	0.0173544	0.00294951	0.0254218	adk, AK; adenylate kinase [EC:2.7.4.3]
479	K00940	4.13338	4.25311	4.09907	-0.282151	1.03227	-0.267461	0.401429	0.168758	0.264974	0.365483	0.479035	ndk, NME; nucleoside-diphosphate kinase [EC:2.7.4.6]
480	K00941	5.95306	6.12933	5.52187	-0.723354	0.810609	-0.852519	0.198515	0.000617493	0.0173517	0.00288493	0.0252016	thiD; hydroxymethylpyrimidine/phosphomethylpyrimidine kinase [EC:2.7.1.49 2.7.4.7]
481	K00942	6.33338	6.42426	5.92333	-0.608296	0.860383	-0.711592	0.243073	0.00460434	0.0215328	0.0120279	0.0422288	E2.7.4.8, gmk; guanylate kinase [EC:2.7.4.8]
482	K00943	5.05907	5.49324	4.77737	-0.651097	0.840613	-0.704801	0.225935	0.0114735	0.0387659	0.00768767	0.0326313	tmk, DTYMK; dTMP kinase [EC:2.7.4.9]
483	K00945	6.83361	7.07517	6.63517	-0.650732	0.867905	-0.716304	0.210511	0.005074	0.0227776	0.00459777	0.0272509	cmk; CMP/dCMP kinase [EC:2.7.4.25]
484	K00946	4.35561	4.63936	4.12089	-0.563012	1.01963	-0.492363	0.272857	0.00961766	0.034629	0.031469	0.0752776	thiL; thiamine-monophosphate kinase [EC:2.7.4.16]
485	K00948	6.60467	6.76	6.20462	-0.610893	0.837266	-0.73891	0.227364	0.00210626	0.0173544	0.00733732	0.0318332	PRPS, prsA; ribose-phosphate pyrophosphokinase [EC:2.7.6.1]
486	K00949	6.18445	6.26936	5.79388	-0.622447	0.888549	-0.72518	0.214225	0.00244335	0.0173565	0.00511841	0.0279201	thiN, TPK1, THI80; thiamine pyrophosphokinase [EC:2.7.6.2]
487	K00950	5.14039	5.4208	4.97779	-0.469353	1.11839	-0.383467	0.319052	0.0396859	0.091441	0.0795848	0.143384	folK; 2-amino-4-hydroxy-6-hydroxymethyldihydropteridine diphosphokinase [EC:2.7.6.3]
488	K00951	6.53782	6.70547	6.19276	-0.618566	0.856019	-0.670659	0.235714	0.0029737	0.0176323	0.00898063	0.0353798	relA; GTP pyrophosphokinase [EC:2.7.6.5]
489	K00952	0.225479	0.525921	-0.187084	-0.772273	1.48584	-0.442498	0.293059	0.0573128	0.117662	0.0447219	0.093958	nadM; nicotinamide-nucleotide adenylyltransferase [EC:2.7.7.1]
490	K00954	6.25262	6.36299	5.87875	-0.62377	0.847894	-0.723818	0.219714	0.00262928	0.0173725	0.00535585	0.0280464	E2.7.7.3A, coaD, kdtB; pantetheine-phosphate adenylyltransferase [EC:2.7.7.3]
491	K00955	-10.0904	-9.52375	-10.4736	-1.04865	4.6171	-0.204161	0.398286	0.405644	0.490093	0.391658	0.472626	cysNC; bifunctional enzyme CysN/CysC [EC:2.7.7.4 2.7.1.25]
492	K00956	4.57557	4.79031	4.0837	-0.634537	1.18524	-0.501629	0.275064	0.0226402	0.0617859	0.0274241	0.0693789	cysN; sulfate adenylyltransferase subunit 1 [EC:2.7.7.4]
493	K00957	4.65388	5.01952	4.2649	-0.680065	1.03998	-0.598401	0.232219	0.00787321	0.0303221	0.0100833	0.0379645	cysD; sulfate adenylyltransferase subunit 2 [EC:2.7.7.4]
494	K00958	-9.5652	-9.8205	-9.28923	0.988396	5.9178	0.148656	0.436	0.537998	0.62639	0.507079	0.590535	sat, met3; sulfate adenylyltransferase [EC:2.7.7.4]
495	K00960	-10.289	-10.0761	-10.4509	-0.311289	4.47605	-0.0630546	0.468286	0.506811	0.591147	0.509044	0.591005	E2.7.7.6; DNA-directed RNA polymerase [EC:2.7.7.6]
496	K00962	6.12376	6.33922	5.87847	-0.652725	0.841059	-0.754449	0.194571	0.00170294	0.017353	0.00248894	0.0247338	pnp, PNPT1; polyribonucleotide nucleotidyltransferase [EC:2.7.7.8]
497	K00963	4.72777	5.23744	4.58322	-0.420798	0.956254	-0.391415	0.358	0.157864	0.251512	0.175009	0.268261	UGP2, galU, galF; UTP--glucose-1-phosphate uridylyltransferase [EC:2.7.7.9]
498	K00965	5.78222	5.98997	5.48403	-0.598798	0.844358	-0.709233	0.244	0.00549085	0.023924	0.0120026	0.0423005	galT, GALT; UDPglucose--hexose-1-phosphate uridylyltransferase [EC:2.7.7.12]
499	K00966	-10.111	-9.19063	-10.6957	-1.92394	6.07214	-0.319555	0.336857	0.165923	0.236618	0.231322	0.300995	GMPP; mannose-1-phosphate guanylyltransferase [EC:2.7.7.13]
500	K00968	-0.734616	0.358731	-1.98188	-2.98206	4.28211	-0.625705	0.197372	0.00409994	0.0206583	0.00211296	0.0238431	PCYT1; choline-phosphate cytidylyltransferase [EC:2.7.7.15]
501	K00969	6.27057	6.40874	5.88284	-0.636078	0.841581	-0.755632	0.196857	0.00199791	0.0173544	0.00288927	0.0253195	nadD; nicotinate-nucleotide adenylyltransferase [EC:2.7.7.18]
502	K00970	4.15874	4.17618	4.15726	-0.296471	1.19387	-0.249795	0.404	0.0645931	0.128287	0.355097	0.468526	pcnB; poly(A) polymerase [EC:2.7.7.19]
503	K00971	5.48719	5.57937	5.11657	-0.528906	1.05247	-0.489036	0.288489	0.00734599	0.0289418	0.0402012	0.0876257	manC, cpsB; mannose-1-phosphate guanylyltransferase [EC:2.7.7.13]
504	K00972	1.50725	2.09011	0.724967	-1.11253	1.83981	-0.374771	0.222222	0.359452	0.471255	0.00632216	0.0300708	UAP1; UDP-N-acetylglucosamine/UDP-N-acetylgalactosamine diphosphorylase [EC:2.7.7.23 2.7.7.83]
505	K00973	6.1257	6.34395	5.79991	-0.592459	0.850993	-0.679574	0.217714	0.00525588	0.0232797	0.00596122	0.029183	E2.7.7.24, rfbA, rffH; glucose-1-phosphate thymidylyltransferase [EC:2.7.7.24]
506	K00974	5.55494	5.87984	5.26323	-0.606627	0.81741	-0.689448	0.217938	0.0151612	0.046706	0.00599539	0.0292932	cca; tRNA nucleotidyltransferase (CCA-adding enzyme) [EC:2.7.7.72 3.1.3.- 3.1.4.-]
507	K00975	6.90028	7.16765	6.35309	-0.801269	0.866114	-0.837511	0.201657	0.00191651	0.0173537	0.00328559	0.0257363	glgC; glucose-1-phosphate adenylyltransferase [EC:2.7.7.27]
508	K00978	2.67694	3.00628	2.01956	-0.85197	0.927604	-0.790666	0.212857	0.00582593	0.0248434	0.00440277	0.0271277	rfbF; glucose-1-phosphate cytidylyltransferase [EC:2.7.7.33]
509	K00979	4.3605	4.71237	4.09527	-0.599092	1.05876	-0.494232	0.270857	0.0109576	0.0376439	0.0270176	0.0687828	kdsB; 3-deoxy-manno-octulosonate cytidylyltransferase (CMP-KDO synthetase) [EC:2.7.7.38]
510	K00980	3.2684	3.52808	2.83718	-0.63263	1.08403	-0.545504	0.298	0.0367392	0.0867124	0.0503866	0.101918	tagD; glycerol-3-phosphate cytidylyltransferase [EC:2.7.7.39]
511	K00981	6.25184	6.3731	5.90547	-0.58458	0.833227	-0.694682	0.227714	0.00399025	0.0199562	0.00767679	0.0324933	E2.7.7.41, CDS1, CDS2, cdsA; phosphatidate cytidylyltransferase [EC:2.7.7.41]
512	K00982	2.9321	3.27224	2.57852	-0.656331	1.48727	-0.378521	0.334476	0.0497202	0.106841	0.104924	0.178098	glnE; [glutamine synthetase] adenylyltransferase / [glutamine synthetase]-adenylyl-L-tyrosine phosphorylase [EC:2.7.7.42 2.7.7.89]
513	K00983	2.92443	3.70993	2.60867	-0.850013	2.1403	-0.371655	0.332857	0.0830548	0.153872	0.101248	0.173227	neuA; N-acylneuraminate cytidylyltransferase [EC:2.7.7.43]
514	K00984	3.06545	3.37805	2.62651	-0.315209	1.58834	-0.131909	0.388571	0.66174	0.755687	0.291581	0.401473	aadA; streptomycin 3\-adenylyltransferase [EC:2.7.7.47]"
515	K00986	2.88115	3.85288	2.63176	-1.15105	1.77825	-0.609627	0.252	0.00791645	0.0304473	0.0141806	0.0470979	ltrA; RNA-directed DNA polymerase [EC:2.7.7.49]
516	K00989	3.69395	3.99257	3.03676	-0.906118	1.10952	-0.782219	0.202514	0.00127763	0.0173525	0.00371824	0.0262281	rph; ribonuclease PH [EC:2.7.7.56]
517	K00990	2.93493	3.2738	2.5792	-0.677095	1.50106	-0.387704	0.331048	0.048778	0.105473	0.103102	0.175663	glnD; [protein-PII] uridylyltransferase [EC:2.7.7.59]
518	K00991	6.19494	6.56279	5.82979	-0.783844	0.840399	-0.896578	0.154813	0.000242681	0.0173517	0.000447958	0.0178399	ispD; 2-C-methyl-D-erythritol 4-phosphate cytidylyltransferase [EC:2.7.7.60]
519	K00992	-0.8818	-0.760987	-1.41739	-0.336247	4.22264	-0.0543345	0.453143	0.0722947	0.138884	0.644898	0.740149	murU; N-acetyl-alpha-D-muramate 1-phosphate uridylyltransferase [EC:2.7.7.99]
520	K00995	6.06151	6.34071	5.55016	-0.676743	0.841347	-0.786788	0.218	0.00217853	0.0173541	0.00537592	0.0283314	pgsA, PGS1; CDP-diacylglycerol---glycerol-3-phosphate 3-phosphatidyltransferase [EC:2.7.8.5]
521	K00996	1.27022	1.12812	1.53863	0.198295	2.28737	0.0836168	0.461714	0.905134	0.936859	0.752439	0.826264	rfbP; undecaprenyl-phosphate galactose phosphotransferase [EC:2.7.8.6]
522	K00997	4.98477	5.16308	4.74033	-0.441098	0.78436	-0.549192	0.290571	0.0165142	0.0494518	0.0445006	0.0936777	acpS; holo-[acyl-carrier protein] synthase [EC:2.7.8.7]
523	K00998	-2.21216	-3.01458	-0.76757	2.37119	2.52643	0.900822	0.160811	0.00107464	0.0174045	0.000551585	0.0182105	pssA; CDP-diacylglycerol---serine O-phosphatidyltransferase [EC:2.7.8.8]
524	K01000	6.29601	6.43214	5.95591	-0.636236	0.854893	-0.763218	0.207714	0.00190837	0.0173537	0.00388482	0.0264873	mraY; phospho-N-acetylmuramoyl-pentapeptide-transferase [EC:2.7.8.13]
525	K01002	2.97318	3.36535	2.57084	-0.554433	1.11701	-0.515212	0.300486	0.0493211	0.106218	0.0613202	0.11746	mdoB; phosphoglycerol transferase [EC:2.7.8.20]
526	K01004	-9.56021	-9.57166	-9.54832	0.290319	5.04766	0.0507795	0.477143	0.546748	0.633078	0.584371	0.665371	pcs; phosphatidylcholine synthase [EC:2.7.8.24]
527	K01006	5.97214	6.17827	5.59619	-0.627632	0.873086	-0.702093	0.207084	0.00288325	0.0175373	0.00409556	0.0266785	ppdK; pyruvate, orthophosphate dikinase [EC:2.7.9.1]
528	K01007	1.24706	1.3065	1.1541	-0.10934	1.27733	-0.0731548	0.459297	0.895897	0.930153	0.700418	0.784114	pps, ppsA; pyruvate, water dikinase [EC:2.7.9.2]
529	K01008	5.09802	5.39222	4.94986	-0.698756	0.927271	-0.708111	0.237646	0.0061062	0.0256114	0.010109	0.0379629	selD, SEPHS; selenide, water dikinase [EC:2.7.9.3]
530	K01011	1.80069	1.62262	1.87262	0.288891	1.05126	0.267045	0.388	0.208756	0.313192	0.298065	0.407966	TST, MPST, sseA; thiosulfate/3-mercaptopyruvate sulfurtransferase [EC:2.8.1.1 2.8.1.2]
531	K01012	6.12074	6.50886	5.90072	-0.68835	0.850828	-0.827209	0.186286	0.000769393	0.0173522	0.00166597	0.0226573	bioB; biotin synthase [EC:2.8.1.6]
532	K01023	0.434245	2.29564	-0.642999	-2.68524	3.18094	-0.875674	0.175429	0.000435485	0.0173517	0.00125126	0.0207803	assT; arylsulfate sulfotransferase [EC:2.8.2.22]
533	K01026	2.77362	3.28106	2.27155	-1.03255	1.22994	-0.810208	0.166571	0.000952984	0.0173519	0.000992501	0.0195725	pct; propionate CoA-transferase [EC:2.8.3.1]
534	K01027	-10.3187	-10.0963	-10.5061	-0.294533	4.66634	-0.0575157	0.467009	0.529661	0.611246	0.514532	0.595046	OXCT; 3-oxoacid CoA-transferase [EC:2.8.3.5]
535	K01028	-2.40978	-2.48899	-2.31159	0.0991463	3.13678	0.0302827	0.479292	0.641716	0.733665	0.858508	0.902535	E2.8.3.5A, scoA; 3-oxoacid CoA-transferase subunit A [EC:2.8.3.5]
536	K01029	-1.21917	-0.81398	-2.09671	-1.18319	1.84516	-0.518343	0.219143	0.0340592	0.0811762	0.0073091	0.0326255	E2.8.3.5B, scoB; 3-oxoacid CoA-transferase subunit B [EC:2.8.3.5]
537	K01031	-9.49237	-9.499	-9.48412	0.297449	5.56161	0.0473049	0.477143	0.543297	0.628436	0.57956	0.659471	pcaI; 3-oxoadipate CoA-transferase, alpha subunit [EC:2.8.3.6]
538	K01032	-9.55959	-9.58044	-9.53475	0.262152	5.37727	0.0407576	0.474722	0.544846	0.629957	0.576992	0.658187	pcaJ; 3-oxoadipate CoA-transferase, beta subunit [EC:2.8.3.6]
539	K01034	2.26777	2.96331	1.51721	-1.19134	1.25676	-0.85957	0.171143	0.000308183	0.0173517	0.000889006	0.0191827	atoD; acetate CoA/acetoacetate CoA-transferase alpha subunit [EC:2.8.3.8 2.8.3.9]
540	K01035	2.311	3.00971	1.59896	-1.23574	1.28752	-0.888328	0.156286	0.000269421	0.0173517	0.000703765	0.0185202	atoA; acetate CoA/acetoacetate CoA-transferase beta subunit [EC:2.8.3.8 2.8.3.9]
541	K01039	-4.60054	-4.19558	-4.99305	-1.1996	3.96447	-0.321451	0.314571	0.0459473	0.0994207	0.0915143	0.157602	gctA; glutaconate CoA-transferase, subunit A [EC:2.8.3.12]
542	K01040	-4.58673	-4.2009	-4.99114	-1.2289	3.88578	-0.338591	0.32048	0.0457242	0.0989166	0.0930123	0.158783	gctB; glutaconate CoA-transferase, subunit B [EC:2.8.3.12]
543	K01042	2.17361	2.59512	1.99367	-0.518376	0.781704	-0.608203	0.26621	0.0290474	0.0734946	0.024978	0.0655284	selA; L-seryl-tRNA(Ser) seleniumtransferase [EC:2.9.1.1]
544	K01046	0.433708	0.636236	-0.139612	-0.726207	1.63575	-0.349394	0.283633	0.0477473	0.103786	0.0411208	0.0888372	lip, TGL2; triacylglycerol lipase [EC:3.1.1.3]
545	K01048	3.84714	3.97266	3.29326	-0.767454	1.02347	-0.749518	0.222508	0.0020433	0.0173541	0.00685682	0.0308666	pldB; lysophospholipase [EC:3.1.1.5]
546	K01051	4.30521	5.1419	3.84201	-1.08517	1.6689	-0.63621	0.257069	0.00617712	0.0258276	0.0162503	0.0512219	E3.1.1.11; pectinesterase [EC:3.1.1.11]
547	K01053	-9.27385	-7.90821	-10.0832	-2.32945	5.281	-0.397277	0.319623	0.189143	0.258977	0.157984	0.224825	E3.1.1.17, gnl, RGN; gluconolactonase [EC:3.1.1.17]
548	K01055	-9.52266	-9.60733	-9.45552	0.347947	5.33205	0.0572223	0.47	0.555736	0.638689	0.585367	0.66149	pcaD; 3-oxoadipate enol-lactonase [EC:3.1.1.24]
549	K01056	6.2498	6.36136	5.87872	-0.621456	0.861304	-0.735624	0.211654	0.00260999	0.0173674	0.00532054	0.027986	PTH1, pth, spoVC; peptidyl-tRNA hydrolase, PTH1 family [EC:3.1.1.29]
550	K01057	4.08742	4.51299	3.62794	-0.8779	1.28091	-0.651484	0.232857	0.00688497	0.0277195	0.00889753	0.0353631	PGLS, pgl, devB; 6-phosphogluconolactonase [EC:3.1.1.31]
551	K01058	0.00671278	0.625834	-0.502731	-1.15842	1.87245	-0.585357	0.241714	0.00999202	0.0353523	0.0131074	0.0445195	pldA; phospholipase A1/A2 [EC:3.1.1.32 3.1.1.4]
552	K01060	3.19481	3.46451	2.86935	-0.268703	1.3226	-0.194384	0.383143	0.779907	0.846965	0.288474	0.397985	cah; cephalosporin-C deacetylase [EC:3.1.1.41]
553	K01061	-2.42333	-3.55262	-1.58088	1.95007	3.8283	0.430328	0.294202	0.102778	0.177374	0.0485357	0.0993673	E3.1.1.45; carboxymethylenebutenolidase [EC:3.1.1.45]
554	K01066	-1.58796	-2.39397	-1.24263	1.31451	3.15653	0.357823	0.323429	0.22724	0.326998	0.0967044	0.166728	aes; acetyl esterase [EC:3.1.1.-]
555	K01069	-1.52588	-2.03932	-0.661914	1.30677	2.12479	0.562116	0.271351	0.0297784	0.0740422	0.0246781	0.0648421	gloB, HAGH; hydroxyacylglutathione hydrolase [EC:3.1.2.6]
556	K01070	-2.8731	-3.63416	-1.8054	2.17873	4.273	0.441852	0.275429	0.0781593	0.144076	0.0402911	0.0877269	frmB, ESD, fghA; S-formylglutathione hydrolase [EC:3.1.2.12]
557	K01071	1.61822	1.70549	1.21067	0.235379	2.75246	0.0919809	0.457143	0.4931	0.609816	0.689725	0.777057	MCH; medium-chain acyl-[acyl-carrier-protein] hydrolase [EC:3.1.2.21]
558	K01073	-5.5865	-2.68971	-7.78959	-2.97574	8.58784	-0.339635	0.345143	0.183882	0.274431	0.158058	0.242354	E3.1.2.20; acyl-CoA hydrolase [EC:3.1.2.20]
559	K01075	-7.12676	-1.94847	-9.6739	-6.51396	6.86995	-0.82159	0.195658	0.00653238	0.0274654	0.00416651	0.0265418	E3.1.2.23; 4-hydroxybenzoyl-CoA thioesterase [EC:3.1.2.23]
560	K01077	4.31203	5.05378	4.16463	-0.609262	1.14497	-0.484414	0.313143	0.040936	0.0933991	0.0815529	0.145954	E3.1.3.1, phoA, phoB; alkaline phosphatase [EC:3.1.3.1]
561	K01079	4.59282	4.82219	4.39778	-0.538175	0.980135	-0.534154	0.273143	0.00891834	0.0329626	0.0237544	0.0638414	serB, PSPH; phosphoserine phosphatase [EC:3.1.3.3]
562	K01081	4.28495	4.46858	3.92339	-0.517511	1.26074	-0.394255	0.288489	0.0534407	0.112322	0.0423717	0.0906602	E3.1.3.5; 5'-nucleotidase [EC:3.1.3.5]
563	K01082	3.92898	4.37389	3.7204	-0.57207	1.37359	-0.404695	0.298486	0.0469694	0.102754	0.0499627	0.101337	cysQ, MET22, BPNT1; 3'(2'), 5'-bisphosphate nucleotidase [EC:3.1.3.7]
564	K01083	-10.2467	-10.1022	-10.352	-0.0427053	4.56408	-0.00805421	0.49643	0.505588	0.591648	0.531295	0.61368	E3.1.3.8; 3-phytase [EC:3.1.3.8]
565	K01085	-2.21716	-2.99717	-0.770369	2.3099	2.47519	0.892062	0.159383	0.00112294	0.017449	0.000565173	0.0182114	agp; glucose-1-phosphatase [EC:3.1.3.10]
566	K01087	-3.53823	-4.57229	-2.53068	2.19901	4.08643	0.462895	0.274493	0.0617801	0.121643	0.0328163	0.07685	otsB; trehalose 6-phosphate phosphatase [EC:3.1.3.12]
567	K01089	3.92058	4.30265	3.88619	-0.47756	1.18513	-0.387527	0.325621	0.0437928	0.097881	0.092191	0.160731	hisB; imidazoleglycerol-phosphate dehydratase / histidinol-phosphatase [EC:4.2.1.19 3.1.3.15]
568	K01090	6.04688	6.30689	5.65953	-0.722995	0.83369	-0.817947	0.198857	0.00184151	0.0173533	0.00256393	0.0248246	E3.1.3.16; protein phosphatase [EC:3.1.3.16]
569	K01091	7.49952	7.66737	7.20599	-0.663635	0.858633	-0.739147	0.229934	0.00362848	0.0190613	0.00863497	0.034695	gph; phosphoglycolate phosphatase [EC:3.1.3.18]
570	K01092	5.07612	5.4745	4.9694	-0.638787	0.951558	-0.613793	0.256213	0.00743792	0.029178	0.0191588	0.0563604	E3.1.3.25, IMPA, suhB; myo-inositol-1(or 4)-monophosphatase [EC:3.1.3.25]
571	K01093	-0.999706	-1.21146	-0.646132	0.348542	2.2709	0.139992	0.434571	0.549029	0.65932	0.573425	0.678681	appA; 4-phytase / acid phosphatase [EC:3.1.3.26 3.1.3.2]
572	K01095	2.96359	3.19061	2.69454	-0.877167	1.51108	-0.579062	0.279714	0.0103476	0.0362752	0.0384877	0.0852159	pgpA; phosphatidylglycerophosphatase A [EC:3.1.3.27]
573	K01096	-2.2148	-3.00344	-0.763027	2.32638	2.48287	0.893329	0.15367	0.00104543	0.0173904	0.000533032	0.0181621	pgpB; phosphatidylglycerophosphatase B [EC:3.1.3.27 3.1.3.81 3.1.3.4 3.6.1.27]
574	K01101	1.28161	1.051	1.42483	0.636745	2.30501	0.250087	0.389889	0.349783	0.46969	0.297779	0.408174	E3.1.3.41; 4-nitrophenyl phosphatase [EC:3.1.3.41]
575	K01104	7.3107	7.40382	6.94011	-0.54457	0.894046	-0.637835	0.254499	0.0100322	0.0355786	0.0197668	0.0572142	E3.1.3.48; protein-tyrosine phosphatase [EC:3.1.3.48]
576	K01113	-10.2544	-10.151	-10.3287	-0.057033	4.51352	-0.0114694	0.495143	0.54577	0.630279	0.557878	0.639547	phoD; alkaline phosphatase D [EC:3.1.3.1]
577	K01114	-0.36819	-1.14194	-0.095727	0.629602	2.03833	0.240682	0.400743	0.584888	0.690246	0.367476	0.481033	plc; phospholipase C [EC:3.1.4.3]
578	K01118	1.7817	2.05665	1.58392	-0.307193	1.16649	-0.249659	0.402171	0.362922	0.482912	0.345091	0.457769	acpD, azoR; FMN-dependent NADH-azoreductase [EC:1.7.1.17]
579	K01119	4.25891	4.32574	4.18455	-0.304369	1.08407	-0.276676	0.369714	0.132753	0.220024	0.209759	0.309996	cpdB; 2',3'-cyclic-nucleotide 2'-phosphodiesterase / 3'-nucleotidase [EC:3.1.4.16 3.1.3.6]
580	K01120	-9.90516	-10.0706	-9.78237	0.642785	5.00034	0.10979	0.444571	0.476074	0.560369	0.526288	0.604718	cpdP; 3',5'-cyclic-nucleotide phosphodiesterase [EC:3.1.4.17]
581	K01121	-10.3983	-9.8418	-10.7421	-0.987682	4.6235	-0.185232	0.404857	0.409679	0.48757	0.38853	0.465619	CNP; 2',3'-cyclic-nucleotide 3'-phosphodiesterase [EC:3.1.4.37]
582	K01126	6.20441	6.49155	5.86327	-0.499169	0.816354	-0.605378	0.259069	0.00933367	0.0339543	0.0195267	0.0565128	E3.1.4.46, glpQ, ugpQ; glycerophosphoryl diester phosphodiesterase [EC:3.1.4.46]
583	K01129	6.02471	6.2411	5.78219	-0.583031	0.869553	-0.692187	0.236857	0.0033006	0.0182727	0.0110958	0.0402064	dgt; dGTPase [EC:3.1.5.1]
584	K01130	3.08515	3.99907	2.68388	-1.12481	1.70374	-0.556531	0.247429	0.0155581	0.0475576	0.0116526	0.041539	E3.1.6.1, aslA; arylsulfatase [EC:3.1.6.1]
585	K01133	1.3007	1.7116	0.113595	-1.24617	2.25369	-0.492787	0.296571	0.0416829	0.0944076	0.0572616	0.111662	betC; choline-sulfatase [EC:3.1.6.6]
586	K01134	-3.95093	-1.85926	-4.61232	-1.85619	7.99238	-0.220443	0.369894	0.302596	0.406257	0.210797	0.307207	ARSA; arylsulfatase A [EC:3.1.6.8]
587	K01135	-2.55948	-2.97095	-2.35674	0.172715	3.47014	0.0406031	0.477429	0.816891	0.870969	0.823273	0.876826	ARSB; arylsulfatase B [EC:3.1.6.12]
588	K01136	-10.3365	-9.99689	-10.5767	-0.403775	4.43479	-0.0739764	0.458726	0.5048	0.587364	0.491857	0.573733	IDS; iduronate 2-sulfatase [EC:3.1.6.13]
589	K01137	-10.1257	-9.53504	-10.5264	-1.10905	5.16837	-0.191052	0.406	0.343155	0.425915	0.374011	0.453796	GNS; N-acetylglucosamine-6-sulfatase [EC:3.1.6.14]
590	K01138	1.72785	2.2241	1.16125	-1.01288	1.75299	-0.564745	0.277143	0.0170237	0.0505255	0.0331118	0.0776344	K01138; uncharacterized sulfatase [EC:3.1.6.-]
591	K01139	-2.10024	-2.81212	-0.754516	2.05514	2.57143	0.730964	0.195658	0.00471875	0.0222318	0.00292187	0.0247552	spoT; GTP diphosphokinase / guanosine-3',5'-bis(diphosphate) 3'-diphosphatase [EC:2.7.6.5 3.1.7.2]
592	K01141	0.186179	-0.428125	0.411904	0.807538	1.26935	0.603578	0.247929	0.012801	0.0415008	0.0154878	0.0490396	sbcB, exoI; exodeoxyribonuclease I [EC:3.1.11.1]
593	K01142	6.18751	6.30763	5.87777	-0.576638	0.886058	-0.648166	0.244787	0.00515376	0.0229952	0.0114025	0.0408498	E3.1.11.2, xthA; exodeoxyribonuclease III [EC:3.1.11.2]
594	K01144	3.82913	4.36883	3.67059	-0.658952	1.42292	-0.407203	0.28649	0.0330316	0.0807472	0.0435616	0.0923363	E3.1.11.5; exodeoxyribonuclease V [EC:3.1.11.5]
595	K01146	-3.30322	-4.58651	-2.52678	2.28394	4.17616	0.477008	0.276	0.0595814	0.117803	0.0295547	0.0720989	xni; protein Xni
596	K01147	0.247111	0.0814488	0.428236	0.478509	1.0347	0.390869	0.314767	0.0804839	0.150024	0.0734551	0.134406	rnb; exoribonuclease II [EC:3.1.13.1]
597	K01150	0.0451119	0.0638388	0.0367554	-0.0118659	1.49685	-0.00627674	0.497001	0.723736	0.80325	0.926148	0.951166	endA; deoxyribonuclease I [EC:3.1.21.1]
598	K01151	5.92473	6.15568	5.52915	-0.676622	0.827758	-0.783074	0.206798	0.00289811	0.0175543	0.00343606	0.0259078	nfo; deoxyribonuclease IV [EC:3.1.21.2]
599	K01153	6.43276	6.65013	6.27049	-0.541431	0.865161	-0.643247	0.206857	0.00698315	0.0279598	0.00372153	0.0262561	hsdR; type I restriction enzyme, R subunit [EC:3.1.21.3]
600	K01154	7.09379	7.33235	6.80652	-0.667879	0.872613	-0.744957	0.160571	0.00180396	0.0173535	0.000729426	0.0186226	hsdS; type I restriction enzyme, S subunit [EC:3.1.21.3]
601	K01155	3.74803	4.34156	3.64588	-0.633012	1.53341	-0.380805	0.337143	0.073639	0.140964	0.119616	0.19773	E3.1.21.4; type II restriction enzyme [EC:3.1.21.4]
602	K01156	4.08502	4.51396	3.62013	-0.672369	1.27829	-0.442124	0.319052	0.164091	0.259287	0.0785138	0.141952	res; type III restriction enzyme [EC:3.1.21.5]
603	K01159	5.37519	5.70182	5.21931	-0.682877	0.894819	-0.720321	0.189714	0.00222349	0.0173544	0.00198105	0.0236503	ruvC; crossover junction endodeoxyribonuclease RuvC [EC:3.1.22.4]
604	K01160	-2.58976	-2.895	-1.52189	1.59712	5.02205	0.271	0.382286	0.194746	0.293067	0.251086	0.356414	rusA; crossover junction endodeoxyribonuclease RusA [EC:3.1.22.4]
605	K01163	5.75262	5.89922	5.39312	-0.664858	0.910166	-0.715837	0.211083	0.00192076	0.0173533	0.00392488	0.0265135	K01163; uncharacterized protein
606	K01166	-4.30306	-7.21741	-3.28441	3.23301	6.07676	0.49715	0.281143	0.0528445	0.104801	0.0364794	0.0812557	E3.1.27.1; ribonuclease T2 [EC:3.1.27.1]
607	K01169	-3.45035	-4.59107	-2.5291	2.21897	4.14296	0.482427	0.268571	0.063763	0.124413	0.0321184	0.0758514	rna; ribonuclease I (enterobacter ribonuclease) [EC:3.1.27.6]
608	K01173	4.87824	5.29838	4.76379	-0.494522	1.20852	-0.35232	0.309714	0.025888	0.0681237	0.0633781	0.12035	ENDOG; endonuclease G, mitochondrial
609	K01174	-2.98767	-2.84766	-3.13852	0.204358	3.65303	0.0484938	0.477863	0.860838	0.903842	0.868701	0.910269	nuc; micrococcal nuclease [EC:3.1.31.1]
610	K01175	-2.20842	-3.00578	-0.767538	2.35313	2.50348	0.893058	0.151429	0.00107301	0.0174012	0.000544295	0.0182033	ybfF; esterase [EC:3.1.-.-]
611	K01176	3.47705	4.0234	3.04958	-0.840685	1.6283	-0.424846	0.269429	0.195586	0.297687	0.0256802	0.0668283	AMY, amyA, malS; alpha-amylase [EC:3.2.1.1]
612	K01179	4.36247	5.59944	4.11777	-0.890993	1.62395	-0.593336	0.249929	0.0247351	0.06592	0.0151506	0.0490224	E3.2.1.4; endoglucanase [EC:3.2.1.4]
613	K01181	2.80413	3.45433	2.13602	-1.11313	1.45928	-0.773115	0.190571	0.000987649	0.017352	0.00193258	0.0234651	E3.2.1.8, xynA; endo-1,4-beta-xylanase [EC:3.2.1.8]
614	K01182	5.51222	5.81382	5.24585	-0.676006	0.882139	-0.698506	0.229077	0.00510255	0.0228627	0.0080262	0.0333599	IMA, malL; oligo-1,6-glucosidase [EC:3.2.1.10]
615	K01183	2.84397	4.10099	2.55919	-1.45477	1.9385	-0.667491	0.190803	0.00685135	0.0276373	0.00237053	0.0243563	E3.2.1.14; chitinase [EC:3.2.1.14]
616	K01185	1.31596	1.14658	1.63053	0.462359	1.55838	0.309385	0.348472	0.126881	0.212324	0.15143	0.238562	E3.2.1.17; lysozyme [EC:3.2.1.17]
617	K01186	4.27194	4.54032	3.85192	-0.424419	1.45981	-0.29257	0.376857	0.262444	0.375544	0.240355	0.345545	NEU1; sialidase-1 [EC:3.2.1.18]
618	K01187	6.57062	7.06251	6.22692	-0.715792	0.900178	-0.778429	0.204	0.00154158	0.0173529	0.00289992	0.0252917	malZ; alpha-glucosidase [EC:3.2.1.20]
619	K01188	-9.64525	-9.46083	-9.80023	-0.464114	5.2778	-0.0863031	0.457298	0.516316	0.600894	0.552723	0.63286	E3.2.1.21; beta-glucosidase [EC:3.2.1.21]
620	K01190	7.6128	8.13651	7.31856	-0.714163	1.01427	-0.66396	0.22565	0.0041318	0.0203136	0.00782243	0.032892	lacZ; beta-galactosidase [EC:3.2.1.23]
621	K01191	4.06727	4.61322	3.8361	-0.767851	1.39216	-0.496795	0.278	0.0259222	0.0681848	0.0327669	0.0771378	MAN2C1; alpha-mannosidase [EC:3.2.1.24]
622	K01192	4.4189	4.91671	4.2199	-0.501452	1.05591	-0.459044	0.316767	0.0577512	0.118513	0.0823853	0.147283	E3.2.1.25, MANBA, manB; beta-mannosidase [EC:3.2.1.25]
623	K01193	6.25264	6.40532	5.87108	-0.714419	0.867921	-0.781185	0.210571	0.00171426	0.017353	0.00420444	0.0268152	INV, sacA; beta-fructofuranosidase [EC:3.2.1.26]
624	K01194	-0.943024	-1.04754	-0.761234	-0.0757736	2.24482	-0.0316612	0.487861	0.717793	0.798548	0.896963	0.931333	TREH, treA, treF; alpha,alpha-trehalase [EC:3.2.1.28]
625	K01195	1.09077	1.41266	0.695813	-0.679306	1.87749	-0.333748	0.330477	0.157803	0.251298	0.0916474	0.159867	uidA, GUSB; beta-glucuronidase [EC:3.2.1.31]
626	K01197	3.39956	3.74678	2.93041	-0.465234	1.72019	-0.260524	0.376286	0.107951	0.187639	0.240922	0.345766	hya; hyaluronoglucosaminidase [EC:3.2.1.35]
627	K01198	3.52442	4.01587	3.21223	-0.89047	1.28561	-0.640367	0.240571	0.0202487	0.0570434	0.0113676	0.0408831	xynB; xylan 1,4-beta-xylosidase [EC:3.2.1.37]
628	K01200	4.88009	5.07956	4.69887	-0.446261	1.00561	-0.441956	0.318857	0.0306827	0.0767218	0.0709943	0.13122	pulA; pullulanase [EC:3.2.1.41]
629	K01201	2.92474	3.31665	2.53724	-1.46142	1.70259	-0.798542	0.178806	0.00066536	0.0173517	0.00148639	0.0219	GBA, srfJ; glucosylceramidase [EC:3.2.1.45]
630	K01202	-10.0304	-9.17807	-10.5298	-1.72393	5.60404	-0.279872	0.363896	0.217307	0.294833	0.282364	0.358324	GALC; galactosylceramidase [EC:3.2.1.46]
631	K01205	3.20101	3.27403	3.20101	-0.407286	1.68239	-0.243399	0.403143	0.303005	0.420491	0.351066	0.464491	NAGLU; alpha-N-acetylglucosaminidase [EC:3.2.1.50]
632	K01206	6.36262	6.8736	6.02525	-0.514943	1.68151	-0.320668	0.350471	0.127103	0.212885	0.157196	0.246258	FUCA; alpha-L-fucosidase [EC:3.2.1.51]
633	K01207	4.89792	5.21523	4.42091	-0.732723	0.818794	-0.818471	0.197658	0.00100822	0.0173525	0.00256903	0.0248497	nagZ; beta-N-acetylhexosaminidase [EC:3.2.1.52]
634	K01209	5.52756	6.15053	5.15604	-0.763044	0.985132	-0.760541	0.188	0.00219029	0.0173542	0.00224455	0.0242591	abfA; alpha-N-arabinofuranosidase [EC:3.2.1.55]
635	K01210	2.92887	3.12595	2.04894	-1.21236	1.96149	-0.513096	0.268857	0.00517537	0.0230808	0.022387	0.0617436	E3.2.1.58; glucan 1,3-beta-glucosidase [EC:3.2.1.58]
636	K01212	-1.21623	0.417904	-1.9639	-2.82575	5.61884	-0.461931	0.277429	0.00974947	0.0347678	0.0342498	0.0792751	sacC, levB; levanase [EC:3.2.1.65]
637	K01215	1.42252	1.77845	1.00635	-0.386235	1.9591	-0.211277	0.405714	0.403339	0.52383	0.403846	0.517707	dexB; glucan 1,6-alpha-glucosidase [EC:3.2.1.70]
638	K01216	-6.83206	-4.6057	-7.38566	-1.97615	9.90474	-0.208676	0.396173	0.428444	0.533996	0.372714	0.474823	E3.2.1.73; licheninase [EC:3.2.1.73]
639	K01218	4.18095	4.30499	3.94471	-0.378888	1.27352	-0.270928	0.349143	0.11199	0.192993	0.152925	0.240719	gmuG; mannan endo-1,4-beta-mannosidase [EC:3.2.1.78]
640	K01220	1.61929	2.15856	1.46945	-0.540164	1.91535	-0.279813	0.371037	0.298135	0.414921	0.215061	0.316543	E3.2.1.85, lacG; 6-phospho-beta-galactosidase [EC:3.2.1.85]
641	K01222	3.43986	3.57243	3.41175	-0.0385451	1.43108	-0.0225222	0.486432	0.888159	0.925243	0.936691	0.958837	E3.2.1.86A, celF; 6-phospho-beta-glucosidase [EC:3.2.1.86]
642	K01223	5.72559	5.74638	5.57983	-0.068871	0.893693	-0.0742676	0.459297	0.818807	0.875704	0.697778	0.783268	E3.2.1.86B, bglA; 6-phospho-beta-glucosidase [EC:3.2.1.86]
643	K01224	4.44798	4.97786	3.71408	-1.14773	1.18103	-0.896955	0.137961	0.000243618	0.0173517	0.000233402	0.017775	E3.2.1.89; arabinogalactan endo-1,4-beta-galactosidase [EC:3.2.1.89]
644	K01226	2.35539	2.95072	2.29933	-0.448071	1.01451	-0.406346	0.321714	0.111904	0.192739	0.0885646	0.155651	treC; trehalose-6-phosphate hydrolase [EC:3.2.1.93]
645	K01227	-8.20764	-9.58292	-6.69155	2.78078	5.92082	0.416236	0.307714	0.157367	0.235815	0.101331	0.165613	E3.2.1.96; mannosyl-glycoprotein endo-beta-N-acetylglucosaminidase [EC:3.2.1.96]
646	K01232	2.96951	3.26419	2.70427	-0.5253	1.2954	-0.386949	0.316	0.0641016	0.127572	0.086092	0.15235	glvA; maltose-6'-phosphate glucosidase [EC:3.2.1.122]
647	K01233	-9.63657	-10.0368	-9.20977	1.21182	4.75494	0.212523	0.396857	0.398462	0.483729	0.401368	0.482557	csn; chitosanase [EC:3.2.1.132]
648	K01235	3.05201	3.51411	2.63659	-0.842226	1.55745	-0.533491	0.280491	0.0155065	0.0474325	0.0317243	0.075681	aguA; alpha-glucuronidase [EC:3.2.1.139]
649	K01239	4.72314	4.89335	3.82849	-0.828133	1.09468	-0.712065	0.260857	0.00616839	0.0257867	0.0175269	0.0536077	iunH; purine nucleosidase [EC:3.2.2.1]
650	K01241	3.84205	4.26259	3.66495	-0.496361	1.406	-0.320766	0.328571	0.095646	0.17104	0.0940252	0.163327	amn; AMP nucleosidase [EC:3.2.2.4]
651	K01243	6.12323	6.23564	5.80195	-0.53788	0.849081	-0.635671	0.247714	0.00481403	0.0220785	0.0132575	0.0448454	mtnN, mtn, pfs; adenosylhomocysteine nucleosidase [EC:3.2.2.9]
652	K01246	4.09716	4.54656	3.88107	-0.66908	0.849663	-0.731067	0.20337	0.00232549	0.0173637	0.00316841	0.0255933	tag; DNA-3-methyladenine glycosylase I [EC:3.2.2.20]
653	K01247	0.489379	0.551937	0.449261	-0.154668	2.11807	-0.0717398	0.465581	0.929316	0.952891	0.729759	0.808136	alkA; DNA-3-methyladenine glycosylase II [EC:3.2.2.21]
654	K01250	0.116945	0.251191	-0.203579	-0.36021	1.33007	-0.230037	0.402571	0.268671	0.381784	0.348438	0.461059	rihA; pyrimidine-specific ribonucleoside hydrolase [EC:3.2.-.-]
655	K01251	2.34939	3.20278	1.84634	-1.30916	1.4452	-0.763739	0.210797	0.015684	0.0477841	0.00518962	0.0281074	E3.3.1.1, ahcY; adenosylhomocysteinase [EC:3.3.1.1]
656	K01252	-3.06558	-4.58948	-2.51439	2.29515	3.57325	0.546475	0.258	0.0531833	0.107602	0.0195927	0.056214	entB, dhbB, vibB, mxcF; bifunctional isochorismate lyase / aryl carrier protein [EC:3.3.2.1 6.3.2.14]
657	K01255	1.36415	1.17812	1.44007	0.35581	1.10611	0.283746	0.360571	0.133694	0.220927	0.192207	0.288892	CARP, pepA; leucyl aminopeptidase [EC:3.4.11.1]
658	K01256	3.91608	4.24379	3.70616	-0.628127	1.30665	-0.458461	0.30934	0.0336572	0.081762	0.0680793	0.127102	pepN; aminopeptidase N [EC:3.4.11.2]
659	K01258	6.04394	6.08048	5.90891	-0.455853	0.888634	-0.497954	0.309429	0.0217595	0.0600228	0.076973	0.139658	pepT; tripeptide aminopeptidase [EC:3.4.11.4]
660	K01259	3.2313	3.88958	2.76138	-0.983848	1.43449	-0.616424	0.264857	0.0162733	0.0490025	0.0194752	0.056905	pip; proline iminopeptidase [EC:3.4.11.5]
661	K01261	-1.04997	-0.941057	-1.12321	-0.0526812	2.32746	-0.0242519	0.487289	0.8406	0.89044	0.879015	0.918436	pepA; glutamyl aminopeptidase [EC:3.4.11.7]
662	K01262	6.61516	6.86772	6.45517	-0.556052	0.830284	-0.674431	0.22	0.00297016	0.0176328	0.0067488	0.0306051	pepP; Xaa-Pro aminopeptidase [EC:3.4.11.9]
663	K01263	-8.91697	-8.31465	-9.31778	-0.766254	8.33956	-0.0914955	0.448571	0.678808	0.755757	0.621021	0.700929	E3.4.11.14; cytosol alanyl aminopeptidase [EC:3.4.11.14]
664	K01265	6.85805	7.00503	6.55423	-0.576693	0.863385	-0.665488	0.232505	0.0029886	0.0176561	0.0082398	0.0337918	map; methionyl aminopeptidase [EC:3.4.11.18]
665	K01266	-4.18927	-3.99448	-4.41034	-0.597009	5.05101	-0.104449	0.448443	0.522273	0.621813	0.63187	0.726171	dmpA, dap; D-aminopeptidase [EC:3.4.11.19]
666	K01267	5.39752	5.52974	5.06448	-0.659498	0.952334	-0.64548	0.27335	0.0129718	0.0420885	0.0289868	0.0716135	DNPEP; aspartyl aminopeptidase [EC:3.4.11.21]
667	K01269	-9.98427	-9.12578	-10.5383	-1.70832	5.24713	-0.290466	0.358571	0.255923	0.335033	0.268538	0.344788	E3.4.11.-; aminopeptidase [EC:3.4.11.-]
668	K01270	6.068	6.30475	5.89646	-0.556649	0.933059	-0.565728	0.267923	0.00737369	0.0290029	0.0229268	0.0623119	pepD; dipeptidase D [EC:3.4.13.-]
669	K01271	3.25553	3.50995	3.16024	-0.0629713	1.05553	-0.0549055	0.471865	0.915928	0.94415	0.797162	0.859925	pepQ; Xaa-Pro dipeptidase [EC:3.4.13.9]
670	K01273	4.90915	5.25118	4.44803	-0.578388	1.11022	-0.504642	0.271714	0.0748828	0.142658	0.0271974	0.0691779	DPEP; membrane dipeptidase [EC:3.4.13.19]
671	K01274	-4.54646	-4.45091	-4.59949	-0.0518567	5.06004	-0.00968073	0.494145	0.723192	0.795145	0.878353	0.916977	E3.4.13.-; D-alanyl-D-alanine dipeptidase [EC:3.4.13.-]
672	K01277	4.06547	4.37094	3.80732	-0.598112	1.19487	-0.432442	0.276207	0.0124728	0.0410106	0.0335856	0.0783623	DPP3; dipeptidyl-peptidase III [EC:3.4.14.4]
673	K01278	5.47803	5.76027	5.28767	-0.734335	1.18941	-0.555866	0.251642	0.00634177	0.02627	0.0148486	0.048337	DPP4, CD26; dipeptidyl-peptidase 4 [EC:3.4.14.5]
674	K01281	0.236615	-0.0987942	0.576436	0.417528	2.30162	0.174613	0.431591	0.426803	0.546765	0.517377	0.628727	pepX; X-Pro dipeptidyl-peptidase [EC:3.4.14.11]
675	K01284	5.33853	5.72385	5.09556	-0.717203	1.18015	-0.500006	0.252857	0.00951755	0.0344253	0.0213175	0.0600726	dcp; peptidyl-dipeptidase Dcp [EC:3.4.15.5]
676	K01286	5.0921	5.32346	4.62339	-0.720295	0.82589	-0.818027	0.196571	0.00108643	0.0173525	0.00265146	0.0247778	E3.4.16.4; D-alanyl-D-alanine carboxypeptidase [EC:3.4.16.4]
677	K01295	0.795909	0.45122	0.997128	0.245831	2.18589	0.112129	0.452157	0.811355	0.870154	0.662317	0.754696	cpg; glutamate carboxypeptidase [EC:3.4.17.11]
678	K01297	3.04817	3.26654	2.649	-0.461039	1.3655	-0.305974	0.358857	0.133251	0.220689	0.18775	0.283983	ldcA; muramoyltetrapeptide carboxypeptidase [EC:3.4.17.13]
679	K01299	1.94611	2.27499	1.46127	-0.663164	1.29821	-0.475195	0.31134	0.0379204	0.0885773	0.0740988	0.135572	E3.4.17.19; carboxypeptidase Taq [EC:3.4.17.19]
680	K01303	-2.47961	-2.54953	-2.3993	1.06988	5.03121	0.182256	0.417024	0.542663	0.649459	0.46394	0.57706	APEH; acylaminoacyl-peptidase [EC:3.4.19.1]
681	K01304	3.59098	3.76673	3.12016	-0.341992	1.19644	-0.28797	0.363896	0.224005	0.331197	0.210737	0.31163	pcp; pyroglutamyl-peptidase [EC:3.4.19.3]
682	K01305	3.53336	3.93371	3.09292	-0.780951	0.942176	-0.730049	0.225429	0.00566048	0.024397	0.00704248	0.0313295	iadA; beta-aspartyl-dipeptidase (metallo-type) [EC:3.4.19.-]
683	K01308	3.05153	3.72486	2.71833	-0.737295	1.08286	-0.682613	0.227364	0.00719956	0.0285385	0.0089916	0.0355281	yqgT; g-D-glutamyl-meso-diaminopimelate peptidase [EC:3.4.19.11]
684	K01318	-10.2248	-10.0983	-10.3382	-0.0304842	4.48211	-0.0062998	0.494716	0.51853	0.60402	0.539216	0.62013	sspA; glutamyl endopeptidase [EC:3.4.21.19]
685	K01322	1.41273	2.29674	0.554808	-1.31712	2.48135	-0.459234	0.284205	0.160674	0.254832	0.0444281	0.0935374	PREP; prolyl oligopeptidase [EC:3.4.21.26]
686	K01338	6.37668	6.57878	5.9359	-0.742499	0.880684	-0.81841	0.172	0.00106769	0.0173525	0.0012897	0.0210857	lon; ATP-dependent Lon protease [EC:3.4.21.53]
687	K01342	-10.2298	-10.0751	-10.37	-0.0848667	4.60685	-0.0161773	0.491003	0.516117	0.600242	0.534893	0.614622	aprE; subtilisin [EC:3.4.21.62]
688	K01347	-4.874	-6.82487	-2.3956	2.99893	6.65721	0.436428	0.301628	0.0759278	0.13955	0.0531126	0.105536	iga; IgA-specific serine endopeptidase [EC:3.4.21.72]
689	K01354	2.67482	3.13817	2.18968	-1.0336	1.94843	-0.458044	0.289143	0.0156193	0.0476737	0.0459387	0.0956388	ptrB; oligopeptidase B [EC:3.4.21.83]
690	K01355	-4.55654	-4.89239	-3.51231	1.32577	4.68793	0.249879	0.387604	0.311713	0.419405	0.273163	0.379086	ompT; omptin [EC:3.4.23.49]
691	K01356	6.03844	6.29638	5.60545	-0.613749	0.843842	-0.669261	0.222	0.0104557	0.0365112	0.00747665	0.032145	lexA; repressor LexA [EC:3.4.21.88]
692	K01358	6.53466	6.70607	6.13524	-0.670774	0.8595	-0.782302	0.202799	0.00140798	0.017353	0.00332774	0.0258791	clpP, CLPP; ATP-dependent Clp protease, protease subunit [EC:3.4.21.92]
693	K01361	-3.08169	-2.93949	-3.10036	-0.70137	6.93899	-0.092199	0.455143	0.568773	0.666187	0.669288	0.757205	E3.4.21.96; lactocepin [EC:3.4.21.96]
694	K01372	5.28496	5.57771	4.98891	-0.770506	1.01585	-0.788665	0.179143	0.000724884	0.0173517	0.00113959	0.02029	BLMH, pepC; bleomycin hydrolase [EC:3.4.22.40]
695	K01387	-9.84394	-10.067	-9.61441	0.778094	4.7633	0.145983	0.429429	0.45482	0.540051	0.471922	0.552178	colA; microbial collagenase [EC:3.4.24.3]
696	K01400	-10.099	-10.0918	-10.1061	0.252449	4.68639	0.0474348	0.47615	0.529475	0.613753	0.561805	0.640589	nprE; bacillolysin [EC:3.4.24.28]
697	K01401	-10.0835	-10.0467	-10.1088	0.236581	4.81336	0.0440812	0.479577	0.534043	0.61815	0.543543	0.625577	aur; aureolysin [EC:3.4.24.29]
698	K01406	-10.0768	-10.0903	-10.068	0.211553	4.76968	0.0368266	0.478286	0.530369	0.617868	0.564671	0.644074	prtC; serralysin [EC:3.4.24.40]
699	K01407	-2.22292	-2.99437	-0.770822	2.34573	2.47381	0.867504	0.157143	0.00109172	0.0174287	0.000551434	0.0182073	ptrA; protease III [EC:3.4.24.55]
700	K01409	6.47014	6.71271	6.26989	-0.610211	0.839507	-0.703072	0.209369	0.00471693	0.0218194	0.00369447	0.0262447	KAE1, tsaD, QRI7; N6-L-threonylcarbamoyladenine synthase [EC:2.3.1.234]
701	K01414	0.238056	-0.0265221	0.410012	0.488244	1.17816	0.38766	0.314571	0.0862291	0.157941	0.0806793	0.144418	prlC; oligopeptidase A [EC:3.4.24.70]
702	K01419	1.0664	1.02609	1.06949	-0.0915473	2.3089	-0.0381424	0.477578	0.627416	0.727642	0.850573	0.899144	hslV, clpQ; ATP-dependent HslUV protease, peptidase subunit HslV [EC:3.4.25.2]
703	K01420	5.12717	5.45795	4.7694	-0.560956	0.904424	-0.568529	0.26621	0.0422941	0.0955208	0.0208688	0.0593367	fnr; CRP/FNR family transcriptional regulator, anaerobic regulatory protein
704	K01421	6.61696	6.84517	6.32235	-0.667276	0.910495	-0.720285	0.222222	0.00305612	0.0177762	0.00725307	0.0316152	yhgE; putative membrane protein
705	K01424	6.20387	6.47683	5.89665	-0.573345	0.859029	-0.636068	0.236571	0.00522687	0.0231984	0.00793648	0.0331093	E3.5.1.1, ansA, ansB; L-asparaginase [EC:3.5.1.1]
706	K01425	3.74498	4.46223	3.41695	-0.8935	1.3468	-0.640789	0.26421	0.0154483	0.0473171	0.0199158	0.0577966	glsA, GLS; glutaminase [EC:3.5.1.2]
707	K01426	0.373384	0.36316	0.378057	0.00574011	2.14723	0.0014592	0.498857	0.95568	0.970824	0.941028	0.961418	E3.5.1.4, amiE; amidase [EC:3.5.1.4]
708	K01428	1.45669	1.99339	1.12449	-0.877357	1.12193	-0.710782	0.216795	0.00548433	0.0239348	0.00538573	0.0285589	ureC; urease subunit alpha [EC:3.5.1.5]
709	K01429	-1.41259	-1.35353	-1.63473	-0.157606	2.58754	-0.045519	0.474286	0.673332	0.760305	0.826263	0.880457	ureB; urease subunit beta [EC:3.5.1.5]
710	K01430	1.33329	1.96598	1.08238	-1.01505	1.20081	-0.790231	0.208571	0.00156714	0.0173537	0.00379265	0.0263127	ureA; urease subunit gamma [EC:3.5.1.5]
711	K01433	3.11045	4.06208	2.52604	-1.06192	2.05103	-0.498115	0.299629	0.0682597	0.13344	0.0483627	0.0990341	purU; formyltetrahydrofolate deformylase [EC:3.5.1.10]
712	K01434	-10.1932	-10.1218	-10.2396	-0.00654633	4.69112	-0.00165417	0.499286	0.529108	0.614315	0.544222	0.625969	E3.5.1.11; penicillin amidase [EC:3.5.1.11]
713	K01436	3.15538	3.5887	2.29138	-1.18959	1.33121	-0.847952	0.172571	0.00030741	0.0173517	0.00106076	0.0199234	K01436; amidohydrolase [EC:3.5.1.-]
714	K01438	3.94032	4.38494	3.86714	-0.543985	1.13107	-0.434213	0.289429	0.035494	0.0847459	0.0494175	0.10058	argE; acetylornithine deacetylase [EC:3.5.1.16]
715	K01439	5.60331	5.87643	5.42184	-0.4965	0.772413	-0.618156	0.251642	0.0185592	0.0536134	0.0161164	0.0507746	dapE; succinyl-diaminopimelate desuccinylase [EC:3.5.1.18]
716	K01442	5.6636	5.95395	5.52147	-0.562637	0.835118	-0.644725	0.255429	0.00524399	0.0232473	0.0147255	0.0480097	E3.5.1.24; choloylglycine hydrolase [EC:3.5.1.24]
717	K01443	6.20618	6.37454	5.99876	-0.501574	0.876014	-0.547552	0.263714	0.015318	0.0470207	0.028075	0.0704169	nagA, AMDHD2; N-acetylglucosamine-6-phosphate deacetylase [EC:3.5.1.25]
718	K01444	1.43574	0.575886	1.538	0.503361	2.40724	0.174222	0.410857	0.698884	0.784552	0.428643	0.542967	AGA, aspG; N4-(beta-N-acetylglucosaminyl)-L-asparaginase [EC:3.5.1.26]
719	K01446	-4.41536	-5.18268	-3.84619	1.45769	5.35339	0.249653	0.354571	0.427343	0.531332	0.179886	0.271257	PGRP; peptidoglycan recognition protein
720	K01447	3.81834	4.41091	3.70909	-0.68412	1.49753	-0.460725	0.334	0.0686371	0.133982	0.119656	0.197727	xlyAB; N-acetylmuramoyl-L-alanine amidase [EC:3.5.1.28]
721	K01448	7.27594	7.52694	6.98653	-0.656868	0.829638	-0.778491	0.189374	0.000876435	0.0173524	0.00201435	0.0236558	amiABC; N-acetylmuramoyl-L-alanine amidase [EC:3.5.1.28]
722	K01449	4.59624	4.83807	4.1345	-0.86651	1.00895	-0.783049	0.176521	0.00159747	0.017353	0.00128756	0.0210688	cwlJ, sleB; N-acetylmuramoyl-L-alanine amidase [EC:3.5.1.28]
723	K01451	3.94311	4.01944	3.66136	-0.176779	1.30648	-0.136145	0.447015	0.567995	0.677751	0.617151	0.717514	hipO; hippurate hydrolase [EC:3.5.1.32]
724	K01453	-10.0895	-10.0401	-10.1317	0.116044	4.66006	0.0227123	0.487714	0.539817	0.626545	0.581555	0.659687	nylB; 6-aminohexanoate-oligomer exohydrolase [EC:3.5.1.46]
725	K01455	-7.41525	-7.54414	-7.26907	0.643614	6.9659	0.0792071	0.458726	0.667714	0.744789	0.700823	0.771062	E3.5.1.49; formamidase [EC:3.5.1.49]
726	K01457	-10.0855	-10.0357	-10.1215	0.134095	4.88041	0.0239393	0.488571	0.524365	0.610657	0.57284	0.651549	atzF; allophanate hydrolase [EC:3.5.1.54]
727	K01458	-7.05668	-7.63262	-6.69683	0.5299	6.48404	0.0730773	0.472722	0.67142	0.751322	0.699973	0.773226	hutG; N-formylglutamate deformylase [EC:3.5.1.68]
728	K01460	-3.32212	-4.60261	-2.43662	2.3213	3.90871	0.508921	0.256286	0.043903	0.0942487	0.0173069	0.0521823	gsp; glutathionylspermidine amidase/synthetase [EC:3.5.1.78 6.3.1.8]
729	K01462	6.92635	7.1484	6.5203	-0.66693	0.81598	-0.786963	0.206512	0.0012495	0.0173525	0.00458532	0.0272286	PDF, def; peptide deformylase [EC:3.5.1.88]
730	K01464	4.26347	4.68685	3.88684	-0.816582	0.94059	-0.834099	0.176807	0.00096774	0.0173525	0.00130384	0.0211341	DPYS, dht, hydA; dihydropyrimidinase [EC:3.5.2.2]
731	K01465	6.29783	6.42624	5.8933	-0.618623	0.82492	-0.729772	0.199086	0.00228815	0.0173544	0.00301134	0.0254289	URA4, pyrC; dihydroorotase [EC:3.5.2.3]
732	K01466	0.540573	0.891593	0.336815	-0.696941	1.80428	-0.346075	0.330286	0.0688966	0.134252	0.0986541	0.169362	allB; allantoinase [EC:3.5.2.5]
733	K01467	-1.30756	-1.70598	-1.04512	0.586284	1.73171	0.326029	0.363143	0.196604	0.297893	0.196871	0.29384	ampC; beta-lactamase class C [EC:3.5.2.6]
734	K01468	3.54892	4.40012	3.40157	-0.861752	1.22699	-0.656964	0.232286	0.00848608	0.031887	0.00935694	0.0363217	hutI, AMDHD1; imidazolonepropionase [EC:3.5.2.7]
735	K01470	3.76478	4.29915	3.52753	-0.753692	0.936531	-0.774575	0.216795	0.00243005	0.0173787	0.00390484	0.0264458	E3.5.2.10; creatinine amidohydrolase [EC:3.5.2.10]
736	K01473	-8.41675	-8.36968	-8.45804	0.169779	5.96598	0.0289411	0.487714	0.654675	0.73421	0.710581	0.780724	hyuA; N-methylhydantoinase A [EC:3.5.2.14]
737	K01474	-8.47278	-8.45563	-8.49089	0.342795	6.07364	0.0514855	0.479863	0.654174	0.733616	0.703866	0.774678	hyuB; N-methylhydantoinase B [EC:3.5.2.14]
738	K01476	1.63484	1.82176	1.09679	-0.364904	1.66182	-0.209175	0.396173	0.609002	0.712304	0.324488	0.436322	E3.5.3.1, rocF, arg; arginase [EC:3.5.3.1]
739	K01478	1.97316	2.33799	1.88733	-0.508862	1.15522	-0.328385	0.306571	0.327653	0.446475	0.057806	0.112505	arcA; arginine deiminase [EC:3.5.3.6]
740	K01479	-2.94053	-3.77802	-2.61356	1.07166	2.95548	0.327245	0.350186	0.105083	0.183065	0.167648	0.257827	hutG; formiminoglutamase [EC:3.5.3.8]
741	K01480	4.32658	4.56226	3.93565	-0.401437	1.19836	-0.368601	0.294857	0.171732	0.268721	0.0461233	0.0959251	speB; agmatinase [EC:3.5.3.11]
742	K01482	3.09078	3.38424	2.78497	-0.329914	1.54875	-0.136794	0.386	0.620107	0.721771	0.286051	0.395446	DDAH, ddaH; dimethylargininase [EC:3.5.3.18]
743	K01483	1.62051	1.93036	1.10115	-0.917519	1.10318	-0.754611	0.188857	0.000787895	0.0173517	0.00233002	0.0241331	allA; ureidoglycolate lyase [EC:4.3.2.3]
744	K01484	-3.25574	-4.57406	-2.43246	2.23305	4.19134	0.45986	0.281063	0.0709118	0.133831	0.0366567	0.0823825	astB; succinylarginine dihydrolase [EC:3.5.3.23]
745	K01485	2.08535	2.38033	2.02938	-0.101296	1.51561	-0.0504953	0.475429	0.425591	0.545844	0.814913	0.87358	codA; cytosine deaminase [EC:3.5.4.1]
746	K01486	4.94737	5.1974	4.63574	-0.661292	0.936375	-0.654128	0.245073	0.0106705	0.0369888	0.0137672	0.0460823	ade; adenine deaminase [EC:3.5.4.2]
747	K01487	4.01343	4.27208	3.55383	-0.771369	0.881939	-0.818426	0.211083	0.00186766	0.017354	0.00404197	0.0265844	E3.5.4.3, guaD; guanine deaminase [EC:3.5.4.3]
748	K01488	2.95266	3.14462	2.86383	-0.141789	1.19122	-0.110648	0.454442	0.793922	0.857253	0.675655	0.765853	add, ADA; adenosine deaminase [EC:3.5.4.4]
749	K01489	6.01074	6.23011	5.77296	-0.618227	0.8423	-0.735503	0.210857	0.00229175	0.0173544	0.00498458	0.0276818	cdd, CDA; cytidine deaminase [EC:3.5.4.5]
750	K01491	6.2674	6.36758	5.87771	-0.603943	0.862464	-0.714113	0.210571	0.00250972	0.0173575	0.00517558	0.0279672	folD; methylenetetrahydrofolate dehydrogenase (NADP+) / methenyltetrahydrofolate cyclohydrolase [EC:1.5.1.5 3.5.4.9]
751	K01492	3.8287	4.2665	3.60909	-0.595553	1.60514	-0.35329	0.332	0.0819963	0.152411	0.105414	0.178819	purNH; phosphoribosylglycinamide/phosphoribosylaminoimidazolecarboxamide formyltransferase [EC:2.1.2.2 2.1.2.3]
752	K01493	6.05308	6.21643	5.77148	-0.586303	0.839705	-0.659633	0.218857	0.00560852	0.0242492	0.00618689	0.0296557	comEB; dCMP deaminase [EC:3.5.4.12]
753	K01494	3.06882	3.44538	2.45613	-0.805236	1.37238	-0.560095	0.275064	0.0133266	0.0428424	0.0357852	0.0814229	dcd; dCTP deaminase [EC:3.5.4.13]
754	K01495	5.68934	5.854	5.33899	-0.702034	0.868782	-0.779377	0.186286	0.000697717	0.0173517	0.00198032	0.0235648	GCH1, folE; GTP cyclohydrolase IA [EC:3.5.4.16]
755	K01496	3.62078	4.2065	3.10102	-0.905939	1.10884	-0.730773	0.217081	0.00223332	0.0173553	0.00657885	0.0304431	hisI; phosphoribosyl-AMP cyclohydrolase [EC:3.5.4.19]
756	K01497	-3.1484	-4.56532	-2.3001	2.32891	3.48628	0.544719	0.237932	0.0426927	0.0914479	0.0122319	0.0424599	ribA, RIB1; GTP cyclohydrolase II [EC:3.5.4.25]
757	K01501	-0.686934	-0.734121	-0.620089	0.11209	2.63615	0.0423693	0.481005	0.935872	0.957352	0.856399	0.902669	E3.5.5.1; nitrilase [EC:3.5.5.1]
758	K01505	-9.46045	-9.45778	-9.46061	0.491818	5.68644	0.0773364	0.461714	0.53542	0.619802	0.595501	0.675914	E3.5.99.7; 1-aminocyclopropane-1-carboxylate deaminase [EC:3.5.99.7]
759	K01507	3.75005	4.16049	3.18698	-0.726909	0.978071	-0.732193	0.223365	0.00257452	0.017417	0.00703152	0.031309	ppa; inorganic pyrophosphatase [EC:3.6.1.1]
760	K01512	4.71739	5.34293	4.43239	-0.876367	0.837318	-0.945666	0.17	0.000440695	0.0173517	0.000860813	0.0190146	acyP; acylphosphatase [EC:3.6.1.7]
761	K01515	6.07976	6.31417	5.72809	-0.600682	0.817378	-0.71703	0.228	0.00538074	0.0236209	0.00800789	0.0332821	nudF; ADP-ribose pyrophosphatase [EC:3.6.1.13]
762	K01520	6.23188	6.34856	5.89048	-0.615044	0.846355	-0.724158	0.224507	0.00305223	0.0177645	0.00690467	0.0308546	dut, DUT; dUTP pyrophosphatase [EC:3.6.1.23]
763	K01521	-3.23933	-4.59272	-2.34364	2.31994	4.11715	0.491565	0.271637	0.0565085	0.113811	0.028066	0.0698284	cdh; CDP-diacylglycerol pyrophosphatase [EC:3.6.1.26]
764	K01523	3.60069	3.98272	3.15176	-0.781698	1.10581	-0.632991	0.251642	0.00486682	0.0222422	0.0156688	0.0500049	hisE; phosphoribosyl-ATP pyrophosphohydrolase [EC:3.6.1.31]
765	K01524	5.37433	5.68572	5.14085	-0.507797	0.920864	-0.517799	0.293143	0.0256434	0.0675963	0.0449525	0.0942729	ppx-gppA; exopolyphosphatase / guanosine-5'-triphosphate,3'-diphosphate pyrophosphatase [EC:3.6.1.11 3.6.1.40]
766	K01525	0.20395	-0.382116	0.454906	0.76915	1.27695	0.570841	0.2485	0.0145284	0.0452014	0.0164165	0.0507991	apaH; bis(5'-nucleosyl)-tetraphosphatase (symmetrical) [EC:3.6.1.41]
767	K01531	2.74893	2.15932	3.12715	0.505269	1.42868	0.329896	0.355143	0.226023	0.333525	0.19099	0.287846	mgtA, mgtB; Mg2+-importing ATPase [EC:3.6.3.2]
768	K01533	5.94341	6.20628	5.58122	-0.687537	0.910007	-0.76687	0.203143	0.00152865	0.017353	0.00342961	0.0259157	copB; Cu2+-exporting ATPase [EC:3.6.3.4]
769	K01534	6.46648	6.66302	6.14544	-0.735061	0.847799	-0.793626	0.176	0.0019127	0.0173538	0.00165571	0.0225842	zntA; Cd2+/Zn2+-exporting ATPase [EC:3.6.3.3 3.6.3.5]
770	K01535	-8.56988	-8.20398	-8.83386	-0.546712	6.644	-0.070497	0.46501	0.663609	0.742536	0.658495	0.735154	PMA1, PMA2; H+-transporting ATPase [EC:3.6.3.6]
771	K01537	6.40536	6.68215	6.16932	-0.525756	0.84771	-0.612868	0.220857	0.0154977	0.0473984	0.00599167	0.0291892	E3.6.3.8; Ca2+-transporting ATPase [EC:3.6.3.8]
772	K01545	-10.3085	-10.0634	-10.5083	-0.430287	4.38026	-0.0847217	0.464724	0.501798	0.584527	0.501094	0.580364	kdpF; K+-transporting ATPase ATPase F chain
773	K01546	4.40749	4.96804	4.03786	-0.869534	0.895077	-0.932936	0.166524	0.000372762	0.0173517	0.000686693	0.0183024	kdpA; K+-transporting ATPase ATPase A chain [EC:3.6.3.12]
774	K01547	4.37182	4.957	4.02315	-0.906278	0.903639	-0.938807	0.156	0.000320539	0.0173517	0.000530749	0.0179007	kdpB; K+-transporting ATPase ATPase B chain [EC:3.6.3.12]
775	K01548	4.50664	5.01295	4.18457	-0.895033	0.927335	-0.95198	0.155099	0.000237743	0.0173517	0.000407466	0.0177989	kdpC; K+-transporting ATPase ATPase C chain [EC:3.6.3.12]
776	K01551	-0.73383	0.891974	-2.00381	-2.92082	3.3982	-0.800566	0.157955	0.00116112	0.0176364	0.000592482	0.0180938	arsA, ASNA1, GET3; arsenite/tail-anchored protein-transporting ATPase [EC:3.6.3.16 3.6.3.-]
777	K01560	4.34158	4.57206	3.97999	-0.391036	1.07407	-0.372603	0.349429	0.163297	0.258287	0.138777	0.222626	E3.8.1.2; 2-haloacid dehalogenase [EC:3.8.1.2]
778	K01561	-5.38541	-6.76939	-4.91725	1.93391	6.67737	0.255669	0.379714	0.371211	0.474639	0.297387	0.402157	dehH; haloacetate dehalogenase [EC:3.8.1.3]
779	K01565	-4.51127	-4.2883	-4.65001	0.0713363	5.69223	0.0115725	0.493429	0.746176	0.813233	0.868914	0.909891	SGSH; N-sulfoglucosamine sulfohydrolase [EC:3.10.1.1]
780	K01567	4.54563	4.85169	3.98943	-0.928727	0.947412	-0.898238	0.159669	0.000407954	0.0173517	0.000496903	0.0179041	pdaA; peptidoglycan-N-acetylmuramic acid deacetylase [EC:3.5.1.-]
781	K01569	-10.0471	-10.0551	-10.0384	0.176391	4.55865	0.0329682	0.481862	0.525309	0.613112	0.559618	0.641799	oxdD; oxalate decarboxylase [EC:4.1.1.2]
782	K01571	5.17748	5.7216	4.91174	-0.78224	0.929316	-0.778571	0.197943	0.00602273	0.0253852	0.00318549	0.0256347	oadA; oxaloacetate decarboxylase, alpha subunit [EC:4.1.1.3]
783	K01572	6.19119	6.56019	5.99195	-0.612439	0.90869	-0.662226	0.221143	0.0034957	0.0187403	0.00618451	0.029526	oadB; oxaloacetate decarboxylase, beta subunit [EC:4.1.1.3]
784	K01573	3.86782	4.25676	3.59258	-0.443767	1.94448	-0.239534	0.34333	0.177499	0.275775	0.135895	0.218898	oadG; oxaloacetate decarboxylase, gamma subunit [EC:4.1.1.3]
785	K01574	-3.97267	-5.31441	-3.7336	1.63645	5.15346	0.270152	0.378	0.23411	0.334686	0.261539	0.367094	adc; acetoacetate decarboxylase [EC:4.1.1.4]
786	K01575	0.701408	0.678034	0.743137	0.433447	2.24046	0.182888	0.42445	0.436939	0.556512	0.484266	0.597136	alsD, budA, aldC; acetolactate decarboxylase [EC:4.1.1.5]
787	K01576	-10.2381	-10.0405	-10.4116	-0.274814	4.49032	-0.051324	0.473293	0.517418	0.599939	0.518291	0.597386	mdlC; benzoylformate decarboxylase [EC:4.1.1.7]
788	K01577	0.300538	0.816516	-0.482139	-1.77041	4.11779	-0.346902	0.328763	0.0646488	0.128241	0.110715	0.185885	oxc; oxalyl-CoA decarboxylase [EC:4.1.1.8]
789	K01579	5.05044	5.43382	4.77553	-0.707175	1.00656	-0.677728	0.190571	0.00197669	0.0173543	0.00259244	0.0248106	panD; aspartate 1-decarboxylase [EC:4.1.1.11]
790	K01580	3.57538	4.28329	2.95226	-0.942817	1.43065	-0.667335	0.236	0.00891532	0.0329358	0.0090853	0.0357326	E4.1.1.15, gadB, gadA, GAD; glutamate decarboxylase [EC:4.1.1.15]
791	K01581	1.88867	1.90362	1.88156	-0.309314	1.60962	-0.199824	0.412454	0.283755	0.399294	0.414551	0.528857	E4.1.1.17, ODC1, speC, speF; ornithine decarboxylase [EC:4.1.1.17]
792	K01582	0.0697732	0.47582	-0.48482	-0.902377	2.57812	-0.338585	0.370571	0.185429	0.285106	0.208925	0.309277	E4.1.1.18, ldcC, cadA; lysine decarboxylase [EC:4.1.1.18]
793	K01583	-2.79008	-2.54971	-3.01568	-0.840281	2.90124	-0.216436	0.373143	0.0927839	0.166665	0.236593	0.339526	E4.1.1.19; arginine decarboxylase [EC:4.1.1.19]
794	K01584	-4.21833	-4.91926	-2.64114	2.12843	4.59566	0.390488	0.321337	0.163437	0.251144	0.088593	0.154991	adiA; arginine decarboxylase [EC:4.1.1.19]
795	K01585	4.11662	4.43849	3.95091	-0.458587	1.03882	-0.417233	0.298486	0.0228425	0.0621909	0.0522828	0.104611	speA; arginine decarboxylase [EC:4.1.1.19]
796	K01586	6.47326	6.57936	6.02081	-0.601756	0.847628	-0.720638	0.230857	0.00302722	0.0177268	0.00842057	0.0341707	lysA; diaminopimelate decarboxylase [EC:4.1.1.20]
797	K01588	6.22501	6.35964	5.87869	-0.663888	0.846098	-0.758565	0.194516	0.0019882	0.0173541	0.00258359	0.0248593	purE; 5-(carboxyamino)imidazole ribonucleotide mutase [EC:5.4.99.18]
798	K01589	3.56677	3.78116	3.21127	-0.507461	1.32688	-0.370549	0.339714	0.0551696	0.114828	0.12296	0.202138	purK; 5-(carboxyamino)imidazole ribonucleotide synthase [EC:6.3.4.18]
799	K01590	-3.46461	-2.50924	-4.15059	-1.33488	4.13946	-0.258272	0.338857	0.361854	0.469405	0.121578	0.199374	hdc, HDC; histidine decarboxylase [EC:4.1.1.22]
800	K01591	6.3399	6.50307	5.94736	-0.627413	0.842373	-0.750618	0.204	0.00166145	0.0173533	0.00456129	0.0272177	pyrF; orotidine-5'-phosphate decarboxylase [EC:4.1.1.23]
801	K01595	3.04865	3.28826	2.47683	-0.830176	1.45111	-0.547233	0.278571	0.0122948	0.0405968	0.0363782	0.0822617	ppc; phosphoenolpyruvate carboxylase [EC:4.1.1.31]
802	K01596	0.375907	1.48432	-0.219818	-1.63842	2.82887	-0.510949	0.29	0.0598257	0.121402	0.0422856	0.0905336	E4.1.1.32, pckA, PCK; phosphoenolpyruvate carboxykinase (GTP) [EC:4.1.1.32]
803	K01597	-0.350944	-0.598917	-0.140602	0.440848	3.05482	0.125182	0.436571	0.825431	0.879654	0.573967	0.679162	MVD, mvaD; diphosphomevalonate decarboxylase [EC:4.1.1.33]
804	K01598	-1.26727	-0.881042	-1.52071	-0.763568	2.53009	-0.281667	0.365324	0.163154	0.257599	0.189737	0.285578	PPCDC, coaC; phosphopantothenoylcysteine decarboxylase [EC:4.1.1.36]
805	K01599	4.55229	4.93475	4.26281	-0.62186	0.858224	-0.68032	0.225429	0.0101905	0.0359117	0.00756273	0.0324014	hemE, UROD; uroporphyrinogen decarboxylase [EC:4.1.1.37]
806	K01601	-1.05174	-0.76083	-1.2212	-0.464291	1.7646	-0.172316	0.363429	0.170616	0.267002	0.202015	0.299314	rbcL; ribulose-bisphosphate carboxylase large chain [EC:4.1.1.39]
807	K01607	5.93626	6.19591	5.72589	-0.660713	0.92211	-0.711804	0.234571	0.00263627	0.0173797	0.00888636	0.0352272	pcaC; 4-carboxymuconolactone decarboxylase [EC:4.1.1.44]
808	K01608	-3.58705	-3.89342	-2.50558	1.60929	4.6766	0.28898	0.374571	0.178792	0.273437	0.228934	0.330524	gcl; tartronate-semialdehyde synthase [EC:4.1.1.47]
809	K01609	5.51674	5.74761	5.16073	-0.669305	0.893963	-0.735049	0.206286	0.00187748	0.0173535	0.00483072	0.0275656	trpC; indole-3-glycerol phosphate synthase [EC:4.1.1.48]
810	K01610	5.58639	5.83766	5.33284	-0.679203	0.976225	-0.681511	0.240217	0.00230325	0.0173547	0.0121548	0.0425009	E4.1.1.49, pckA; phosphoenolpyruvate carboxykinase (ATP) [EC:4.1.1.49]
811	K01611	3.80351	4.21417	3.43874	-0.545806	1.36459	-0.335732	0.342571	0.338185	0.457752	0.142661	0.227822	speD, AMD1; S-adenosylmethionine decarboxylase [EC:4.1.1.50]
812	K01613	5.40556	5.62302	5.07633	-0.690969	0.948364	-0.718979	0.208797	0.00161633	0.017353	0.00437171	0.0270022	psd, PISD; phosphatidylserine decarboxylase [EC:4.1.1.65]
813	K01615	1.61375	2.84506	1.52644	-0.883181	1.84512	-0.417076	0.349714	0.10784	0.187429	0.150168	0.237145	gcdA; glutaconyl-CoA decarboxylase [EC:4.1.1.70]
814	K01619	6.00434	6.10136	5.70931	-0.608547	0.871629	-0.677651	0.259354	0.00672151	0.027254	0.0198529	0.0575398	deoC, DERA; deoxyribose-phosphate aldolase [EC:4.1.2.4]
815	K01620	5.97619	6.1609	5.70638	-0.634212	0.912855	-0.701477	0.207655	0.00214364	0.0173543	0.00348622	0.0259507	ltaE; threonine aldolase [EC:4.1.2.48]
816	K01621	3.27026	3.84939	2.455	-0.990737	1.48478	-0.634543	0.281348	0.00978948	0.0350217	0.0324486	0.0767405	xfp, xpk; xylulose-5-phosphate/fructose-6-phosphate phosphoketolase [EC:4.1.2.9 4.1.2.22]
817	K01623	-1.5997	-1.63804	-1.59689	0.982524	3.46195	0.245792	0.422165	0.338237	0.456116	0.48229	0.594899	ALDO; fructose-bisphosphate aldolase, class I [EC:4.1.2.13]
818	K01624	6.91175	7.07598	6.5298	-0.676317	0.84943	-0.810526	0.20337	0.000787298	0.0173522	0.00403539	0.0266144	FBA, fbaA; fructose-bisphosphate aldolase, class II [EC:4.1.2.13]
819	K01625	5.65523	5.86734	5.25497	-0.612803	0.758884	-0.761914	0.198571	0.0011081	0.0173525	0.00326811	0.0257215	eda; 2-dehydro-3-deoxyphosphogluconate aldolase / (4S)-4-hydroxy-2-oxoglutarate aldolase [EC:4.1.2.14 4.1.3.42]
820	K01626	5.43928	5.71654	5.08226	-0.695916	0.857457	-0.803994	0.198571	0.00121222	0.0173525	0.00287258	0.0252504	E2.5.1.54, aroF, aroG, aroH; 3-deoxy-7-phosphoheptulonate synthase [EC:2.5.1.54]
821	K01627	4.35868	4.6014	4.09727	-0.564067	1.06125	-0.472166	0.270571	0.0109407	0.0375917	0.027222	0.0690806	kdsA; 2-dehydro-3-deoxyphosphooctonate aldolase (KDO 8-P synthase) [EC:2.5.1.55]
822	K01628	4.72792	5.27392	4.0931	-0.999824	0.838006	-1.07459	0.154813	9.5e-05	0.0173517	0.000440038	0.0177879	fucA; L-fuculose-phosphate aldolase [EC:4.1.2.17]
823	K01629	4.45164	4.73374	4.27107	-0.475243	0.965195	-0.47524	0.31	0.0336096	0.0816283	0.0638692	0.121068	rhaD; rhamnulose-1-phosphate aldolase [EC:4.1.2.19]
824	K01630	-0.0920454	0.265992	-0.225693	-0.403523	1.51597	-0.213128	0.414167	0.433677	0.552006	0.459242	0.572287	garL; 2-dehydro-3-deoxyglucarate aldolase [EC:4.1.2.20]
825	K01631	-2.68682	-3.40783	-1.91811	1.82182	4.4399	0.345523	0.31848	0.134083	0.217827	0.0915336	0.159589	dgoA; 2-dehydro-3-deoxyphosphogalactonate aldolase [EC:4.1.2.21]
826	K01633	4.47332	4.61944	4.24827	-0.46955	0.94464	-0.462547	0.305627	0.0202802	0.0570718	0.0640333	0.121287	folB; 7,8-dihydroneopterin aldolase/epimerase/oxygenase [EC:4.1.2.25 5.1.99.8 1.13.11.81]
827	K01635	-0.856912	-1.63102	-0.663806	0.8494	3.00401	0.221817	0.406455	0.45572	0.572773	0.368216	0.481789	lacD; tagatose 1,6-diphosphate aldolase [EC:4.1.2.40]
828	K01637	-3.3182	-4.56125	-2.47713	2.30599	4.13043	0.493457	0.27335	0.0602438	0.118573	0.0298076	0.0724082	E4.1.3.1, aceA; isocitrate lyase [EC:4.1.3.1]
829	K01638	-2.93152	-3.5995	-1.80356	1.84896	3.96821	0.392612	0.307055	0.119852	0.199414	0.062342	0.118891	aceB, glcB; malate synthase [EC:2.3.3.9]
830	K01639	5.1862	5.3869	4.73449	-0.527115	0.896524	-0.547524	0.286571	0.0187387	0.0539707	0.0391423	0.0861228	E4.1.3.3, nanA, NPL; N-acetylneuraminate lyase [EC:4.1.3.3]
831	K01640	-1.47857	-1.06691	-1.77422	-0.721075	1.96134	-0.323212	0.342571	0.142037	0.230914	0.153094	0.239988	E4.1.3.4, HMGCL, hmgL; hydroxymethylglutaryl-CoA lyase [EC:4.1.3.4]
832	K01641	-0.359166	-0.600089	-0.139284	0.354719	3.20921	0.107233	0.445587	0.901614	0.933772	0.664905	0.756227	E2.3.3.10; hydroxymethylglutaryl-CoA synthase [EC:2.3.3.10]
833	K01643	0.665819	0.600957	0.665819	0.597582	1.96825	0.297245	0.38589	0.224647	0.331834	0.291955	0.401982	citF; citrate lyase subunit alpha / citrate CoA-transferase [EC:2.8.3.10]
834	K01644	0.553963	0.697354	0.553963	0.606403	2.00655	0.296247	0.388746	0.212568	0.317684	0.307303	0.418259	citE; citrate lyase subunit beta / citryl-CoA lyase [EC:4.1.3.34]
835	K01646	0.548497	0.464102	0.548497	0.562033	1.86836	0.267871	0.391714	0.237873	0.347201	0.298372	0.408789	citD; citrate lyase subunit gamma (acyl carrier protein)
836	K01647	6.44229	6.6552	6.20791	-0.637922	0.870656	-0.76807	0.184857	0.00142567	0.0173527	0.00163827	0.0225215	CS, gltA; citrate synthase [EC:2.3.3.1]
837	K01649	6.11682	6.32101	5.82177	-0.671615	0.852044	-0.788876	0.197714	0.00146429	0.017353	0.00281431	0.025184	leuA, IMS; 2-isopropylmalate synthase [EC:2.3.3.13]
838	K01652	6.71565	6.96234	6.43541	-0.694225	0.78585	-0.861389	0.187714	0.000824907	0.0173522	0.00221476	0.0240993	E2.2.1.6L, ilvB, ilvG, ilvI; acetolactate synthase I/II/III large subunit [EC:2.2.1.6]
839	K01653	6.4161	6.69443	6.14199	-0.713518	0.844103	-0.862551	0.189429	0.000660009	0.0173517	0.00182121	0.0231396	E2.2.1.6S, ilvH, ilvN; acetolactate synthase I/III small subunit [EC:2.2.1.6]
840	K01654	0.151921	0.976782	-0.88467	-1.81144	3.54447	-0.411039	0.265429	0.0175847	0.0515407	0.0229082	0.0625306	E2.5.1.56, neuB; N-acetylneuraminate synthase [EC:2.5.1.56]
841	K01657	5.70054	5.88257	5.40336	-0.713819	0.841308	-0.799137	0.198229	0.000803829	0.0173522	0.00300919	0.0253905	trpE; anthranilate synthase component I [EC:4.1.3.27]
842	K01658	5.48278	5.7942	5.21027	-0.668108	0.889222	-0.734811	0.20337	0.00170676	0.017353	0.00368811	0.0262135	trpG; anthranilate synthase component II [EC:4.1.3.27]
843	K01659	-4.23768	-4.90774	-2.89026	1.92459	4.57699	0.367429	0.325714	0.175031	0.265359	0.102808	0.174149	prpC; 2-methylcitrate synthase [EC:2.3.3.5]
844	K01661	4.03806	3.98477	4.06688	-0.223525	1.04035	-0.17793	0.414739	0.200757	0.303772	0.442363	0.556645	menB; naphthoate synthase [EC:4.1.3.36]
845	K01662	6.49791	6.75994	6.27371	-0.612878	0.846942	-0.76114	0.177378	0.00127693	0.0173525	0.0014189	0.0216836	dxs; 1-deoxy-D-xylulose-5-phosphate synthase [EC:2.2.1.7]
846	K01664	3.49329	3.59395	3.34302	-0.376644	1.05476	-0.362259	0.305056	0.0741451	0.141583	0.0653648	0.123194	pabA; para-aminobenzoate synthetase component II [EC:2.6.1.85]
847	K01665	4.7555	5.03543	4.39083	-0.560137	1.0708	-0.481612	0.287143	0.0145701	0.0454805	0.0355223	0.0810361	pabB; para-aminobenzoate synthetase component I [EC:2.6.1.85]
848	K01666	2.63	2.89049	2.38018	-0.565313	1.49838	-0.366136	0.350186	0.146782	0.237682	0.152645	0.240515	mhpE; 4-hydroxy 2-oxovalerate aldolase [EC:4.1.3.39]
849	K01667	2.01687	2.32637	1.80836	-0.654891	1.52319	-0.435521	0.302199	0.0475097	0.103493	0.0497964	0.101125	tnaA; tryptophanase [EC:4.1.99.1]
850	K01668	-8.86736	-9.35985	-8.22583	1.61929	5.62915	0.256427	0.386175	0.352132	0.440887	0.357637	0.445797	E4.1.99.2; tyrosine phenol-lyase [EC:4.1.99.2]
851	K01669	-3.22256	-4.41702	-2.39277	2.14956	3.52216	0.539179	0.244216	0.0523705	0.105463	0.0122575	0.042563	phrB; deoxyribodipyrimidine photo-lyase [EC:4.1.99.3]
852	K01671	-4.08467	-4.83898	-2.80563	2.0126	4.31899	0.40912	0.316767	0.101256	0.175136	0.0876482	0.15351	yihT; sulfofructosephosphate aldolase [EC:4.1.2.57]
853	K01673	4.78706	5.05325	4.69381	-0.530851	0.997375	-0.511197	0.284857	0.0138717	0.0440125	0.0362056	0.0820388	cynT, can; carbonic anhydrase [EC:4.2.1.1]
854	K01674	-1.35817	-1.88083	-0.613641	1.10377	3.37345	0.295789	0.345429	0.275811	0.388625	0.140729	0.224832	cah; carbonic anhydrase [EC:4.2.1.1]
855	K01676	4.13365	4.47637	3.96401	-0.503645	1.04881	-0.436407	0.299629	0.0187895	0.054105	0.0499121	0.101264	E4.2.1.2A, fumA, fumB; fumarate hydratase, class I [EC:4.2.1.2]
856	K01677	5.27699	5.68592	5.13125	-0.602756	0.844841	-0.681366	0.235933	0.00933402	0.0339696	0.00881234	0.0350401	E4.2.1.2AA, fumA; fumarate hydratase subunit alpha [EC:4.2.1.2]
857	K01678	5.2779	5.68377	5.13017	-0.624429	0.836979	-0.712932	0.23	0.00891665	0.0329709	0.00790683	0.0330693	E4.2.1.2AB, fumB; fumarate hydratase subunit beta [EC:4.2.1.2]
858	K01679	2.20511	2.27337	2.17922	0.00773933	1.50283	0.00628324	0.496286	0.714255	0.796946	0.940565	0.961155	E4.2.1.2B, fumC, FH; fumarate hydratase, class II [EC:4.2.1.2]
859	K01681	6.08593	6.24434	5.75318	-0.651715	0.86021	-0.754221	0.19423	0.00172438	0.0173533	0.00259927	0.0248162	ACO, acnA; aconitate hydratase [EC:4.2.1.3]
860	K01682	-3.19464	-4.58909	-2.50379	2.25951	4.12214	0.469241	0.279349	0.0584979	0.116169	0.0300186	0.0727279	acnB; aconitate hydratase 2 / 2-methylisocitrate dehydratase [EC:4.2.1.3 4.2.1.99]
861	K01683	-7.42446	-5.85323	-8.77289	-2.41084	5.48774	-0.390828	0.316767	0.147726	0.219173	0.109234	0.177724	araD; D-arabinonate dehydratase [EC:4.2.1.5]
862	K01684	1.05719	1.70407	0.822786	-0.994572	1.63795	-0.569892	0.262211	0.0196181	0.0557337	0.0226131	0.0619196	dgoD; galactonate dehydratase [EC:4.2.1.6]
863	K01685	4.27829	4.94884	4.15259	-0.720789	0.944032	-0.743361	0.229714	0.00390158	0.0197479	0.00843274	0.034253	uxaA; altronate hydrolase [EC:4.2.1.7]
864	K01686	5.23057	5.86746	4.8784	-0.70852	1.11302	-0.618057	0.249929	0.00930569	0.0339126	0.0143305	0.047178	uxuA; mannonate dehydratase [EC:4.2.1.8]
865	K01687	6.1799	6.43575	5.95262	-0.64752	0.844162	-0.788665	0.19623	0.00142202	0.0173527	0.0028103	0.0251653	ilvD; dihydroxy-acid dehydratase [EC:4.2.1.9]
866	K01689	6.49571	6.62097	6.13302	-0.627503	0.861743	-0.760744	0.213653	0.00201938	0.0173544	0.00462893	0.0272733	ENO, eno; enolase [EC:4.2.1.11]
867	K01690	-3.32118	-4.57855	-2.52633	2.24084	4.09306	0.479786	0.276492	0.0586879	0.116454	0.0294438	0.0718742	edd; phosphogluconate dehydratase [EC:4.2.1.12]
868	K01692	-6.96635	-8.23849	-4.8369	2.41423	5.98649	0.350904	0.336571	0.187841	0.271433	0.152175	0.231339	paaF, echA; enoyl-CoA hydratase [EC:4.2.1.17]
869	K01693	5.69983	5.97183	5.29262	-0.741448	0.859159	-0.78453	0.198515	0.00231645	0.0173543	0.00285886	0.0252545	hisB; imidazoleglycerol-phosphate dehydratase [EC:4.2.1.19]
870	K01695	5.8293	5.96299	5.48326	-0.676966	0.832761	-0.79289	0.204571	0.00106347	0.0173525	0.00462006	0.0273348	trpA; tryptophan synthase alpha chain [EC:4.2.1.20]
871	K01696	5.76659	5.93239	5.46818	-0.675166	0.831935	-0.755993	0.217366	0.00142705	0.0173525	0.00472797	0.0274663	trpB; tryptophan synthase beta chain [EC:4.2.1.20]
872	K01697	2.64043	3.07949	2.12474	-1.08916	2.13558	-0.409376	0.29	0.0165591	0.0496114	0.0408806	0.0885642	CBS; cystathionine beta-synthase [EC:4.2.1.22]
873	K01698	4.14914	4.52024	4.03596	-0.617554	0.894279	-0.704509	0.223079	0.00578401	0.0247307	0.00680477	0.0309795	hemB, ALAD; porphobilinogen synthase [EC:4.2.1.24]
874	K01699	-1.38477	-1.42602	-1.33726	0.200995	1.52431	0.110252	0.44	0.203225	0.305753	0.604699	0.701863	pduC; propanediol dehydratase large subunit [EC:4.2.1.28]
875	K01703	6.19043	6.4771	5.97367	-0.663821	0.858343	-0.823082	0.193143	0.000909145	0.0173525	0.00216484	0.02401	leuC, IPMI-L; 3-isopropylmalate/(R)-2-methylmalate dehydratase large subunit [EC:4.2.1.33 4.2.1.35]
876	K01704	6.19003	6.4445	5.96512	-0.664307	0.875152	-0.781097	0.186	0.000927633	0.0173525	0.00194677	0.0235385	leuD, IPMI-S; 3-isopropylmalate/(R)-2-methylmalate dehydratase small subunit [EC:4.2.1.33 4.2.1.35]
877	K01706	-0.903505	-0.436455	-0.978377	-0.399896	2.14677	-0.179572	0.422571	0.582921	0.688463	0.483755	0.596214	gudD; glucarate dehydratase [EC:4.2.1.40]
878	K01707	-10.1935	-10.0539	-10.2957	-0.160786	4.64384	-0.0289181	0.485004	0.527911	0.612827	0.556333	0.636569	kdgD; 5-dehydro-4-deoxyglucarate dehydratase [EC:4.2.1.41]
879	K01708	-1.60087	-1.78117	-1.37493	0.242129	2.24458	0.094367	0.457012	0.735143	0.811194	0.70747	0.789298	garD; galactarate dehydratase [EC:4.2.1.42]
880	K01709	2.67228	3.12603	2.09576	-0.906535	1.02253	-0.797859	0.200571	0.00335639	0.0185227	0.0030537	0.025429	rfbG; CDP-glucose 4,6-dehydratase [EC:4.2.1.45]
881	K01710	6.31711	6.55418	5.87837	-0.673153	0.876204	-0.761666	0.222	0.00185415	0.0173533	0.00582189	0.0289779	E4.2.1.46, rfbB, rffG; dTDP-glucose 4,6-dehydratase [EC:4.2.1.46]
882	K01711	4.59758	5.09651	4.26046	-0.862798	1.08114	-0.767569	0.19166	0.0011659	0.0173525	0.00237319	0.0245163	gmd, GMDS; GDPmannose 4,6-dehydratase [EC:4.2.1.47]
883	K01712	3.57672	4.41371	3.41258	-0.774415	1.15689	-0.620625	0.256784	0.018861	0.0542531	0.0199266	0.0576981	hutU, UROC1; urocanate hydratase [EC:4.2.1.49]
884	K01713	-0.818141	-0.687906	-1.31952	-0.422453	4.01999	-0.0676109	0.442286	0.0820635	0.152382	0.640846	0.737014	pheC; cyclohexadienyl dehydratase [EC:4.2.1.51 4.2.1.91]
885	K01714	6.85755	7.00705	6.70751	-0.538601	0.851595	-0.651384	0.201371	0.00709706	0.0282562	0.0034834	0.0260459	dapA; 4-hydroxy-tetrahydrodipicolinate synthase [EC:4.3.3.7]
886	K01715	4.1012	4.40701	3.60796	-0.962761	0.996425	-0.918001	0.133962	0.00021591	0.0173517	0.000197066	0.017775	crt; enoyl-CoA hydratase [EC:4.2.1.17]
887	K01716	-2.21551	-3.0023	-0.769924	2.38023	2.53123	0.896585	0.151429	0.00104488	0.0174045	0.00055648	0.0182175	fabA; 3-hydroxyacyl-[acyl-carrier protein] dehydratase / trans-2-decenoyl-[acyl-carrier protein] isomerase [EC:4.2.1.59 5.3.3.14]
888	K01719	4.10584	4.45276	3.96482	-0.480362	1.09772	-0.389639	0.310768	0.0274172	0.070941	0.0661086	0.124263	hemD, UROS; uroporphyrinogen-III synthase [EC:4.2.1.75]
889	K01720	-4.03623	-4.63353	-2.8704	1.60516	4.09471	0.321824	0.344286	0.263306	0.365648	0.136833	0.218622	prpD; 2-methylcitrate dehydratase [EC:4.2.1.79]
890	K01725	-10.3007	-10.0757	-10.4639	-0.290309	4.53679	-0.0556976	0.469143	0.508652	0.594507	0.505201	0.587607	cynS; cyanate lyase [EC:4.2.1.104]
891	K01727	-4.62057	-4.4575	-4.62351	-0.0496045	6.99198	-0.00676395	0.495001	0.76351	0.828328	0.859082	0.902024	hysA, hylA, hylB; hyaluronate lyase [EC:4.2.2.1]
892	K01728	-7.61751	-8.6281	-7.02678	0.982928	5.51606	0.159176	0.429592	0.560621	0.648968	0.516755	0.608637	pel; pectate lyase [EC:4.2.2.2]
893	K01729	-5.4731	-3.09066	-8.86843	-4.65994	5.601	-0.773387	0.186857	0.00830409	0.0297363	0.0023861	0.0229978	algL; poly(beta-D-mannuronate) lyase [EC:4.2.2.3]
894	K01730	1.26866	2.63653	0.256121	-2.37379	6.32364	-0.361708	0.301914	0.0259147	0.0679666	0.0470193	0.0971436	ogl; oligogalacturonide lyase [EC:4.2.2.6]
895	K01732	-7.74921	-0.762608	-8.89099	-3.32805	9.04585	-0.427869	0.299629	0.111265	0.183338	0.0735266	0.130956	E4.2.2.10; pectin lyase [EC:4.2.2.10]
896	K01733	6.22939	6.35825	5.81273	-0.655322	0.845353	-0.785116	0.192286	0.00174742	0.0173533	0.0024176	0.0245901	thrC; threonine synthase [EC:4.2.3.1]
897	K01734	6.01809	6.36525	5.59299	-0.806173	0.818106	-0.919822	0.166524	0.000609528	0.0173517	0.000915677	0.0194767	mgsA; methylglyoxal synthase [EC:4.2.3.3]
898	K01735	6.06551	6.27799	5.68532	-0.649562	0.854142	-0.71546	0.202228	0.00282661	0.0174785	0.0030932	0.0255207	aroB; 3-dehydroquinate synthase [EC:4.2.3.4]
899	K01736	6.21837	6.36156	5.87829	-0.657896	0.866046	-0.738696	0.196	0.0018017	0.0173537	0.00246227	0.0246619	aroC; chorismate synthase [EC:4.2.3.5]
900	K01737	5.21629	5.54336	5.12325	-0.591563	0.93653	-0.592265	0.270286	0.00752554	0.0293983	0.0235392	0.0635812	queD, ptpS, PTS; 6-pyruvoyltetrahydropterin/6-carboxytetrahydropterin synthase [EC:4.2.3.12 4.1.2.50]
901	K01738	6.46406	6.75547	6.25077	-0.555495	0.866509	-0.650995	0.226792	0.00806252	0.0308149	0.00645162	0.0300321	cysK; cysteine synthase A [EC:2.5.1.47]
902	K01739	3.43822	3.61204	3.10245	-0.734011	1.3001	-0.526348	0.284857	0.0234895	0.0634517	0.0387622	0.0856041	metB; cystathionine gamma-synthase [EC:2.5.1.48]
903	K01740	7.05589	7.26481	6.68906	-0.657583	0.850383	-0.783359	0.197429	0.00129914	0.0173525	0.00301613	0.0254254	metY; O-acetylhomoserine (thiol)-lyase [EC:2.5.1.49]
904	K01744	4.90358	5.13385	4.61998	-0.563922	1.16271	-0.466533	0.301057	0.0564554	0.116683	0.0509493	0.102717	aspA; aspartate ammonia-lyase [EC:4.3.1.1]
905	K01745	4.25905	5.08142	3.81195	-0.821503	1.41306	-0.543303	0.318857	0.0650878	0.128995	0.0749494	0.136835	hutH, HAL; histidine ammonia-lyase [EC:4.3.1.3]
906	K01746	-1.68204	-1.91341	-1.50163	0.50204	2.55802	0.186112	0.415714	0.678938	0.767497	0.460312	0.572703	E4.3.1.4; formiminotetrahydrofolate cyclodeaminase [EC:4.3.1.4]
907	K01749	4.65104	4.81588	4.26982	-0.707626	0.807621	-0.780893	0.23	0.00423044	0.02057	0.00793982	0.0331705	hemC, HMBS; hydroxymethylbilane synthase [EC:2.5.1.61]
908	K01750	1.45092	1.58153	1.33265	-0.139292	1.02625	-0.124714	0.42902	0.49702	0.612915	0.513637	0.624337	E4.3.1.12, ocd; ornithine cyclodeaminase [EC:4.3.1.12]
909	K01751	2.91159	3.26582	2.63775	-0.596412	0.86085	-0.61087	0.231143	0.0180893	0.0526753	0.00795004	0.0332308	E4.3.1.15; diaminopropionate ammonia-lyase [EC:4.3.1.15]
910	K01752	6.86007	7.10121	6.63015	-0.604158	0.844921	-0.780438	0.17138	0.00132169	0.0173525	0.0012862	0.0211564	E4.3.1.17, sdaA, sdaB, tdcG; L-serine dehydratase [EC:4.3.1.17]
911	K01753	-1.76277	-2.62087	-1.09472	1.36968	2.63658	0.483182	0.291143	0.0670457	0.131128	0.0458536	0.0955919	dsdA; D-serine dehydratase [EC:4.3.1.18]
912	K01754	5.85908	6.18066	5.60536	-0.69657	0.779142	-0.891549	0.160811	0.000803031	0.0173522	0.000700798	0.0183605	E4.3.1.19, ilvA, tdcB; threonine dehydratase [EC:4.3.1.19]
913	K01755	6.2505	6.38814	5.97193	-0.541511	0.859895	-0.621449	0.226286	0.0068929	0.0277202	0.0061096	0.0294693	argH, ASL; argininosuccinate lyase [EC:4.3.2.1]
914	K01756	6.24665	6.36235	5.87834	-0.609114	0.866451	-0.723345	0.220857	0.00259682	0.017367	0.00522432	0.0278773	purB, ADSL; adenylosuccinate lyase [EC:4.3.2.2]
915	K01758	-4.75695	-4.57692	-4.97227	-0.0985638	5.61524	-0.0150112	0.491143	0.744226	0.811749	0.870414	0.910888	CTH; cystathionine gamma-lyase [EC:4.4.1.1]
916	K01759	5.8223	6.14148	5.6254	-0.612991	0.819844	-0.74137	0.215714	0.00314823	0.0179637	0.00525418	0.0281464	GLO1, gloA; lactoylglutathione lyase [EC:4.4.1.5]
917	K01760	3.32552	3.43719	2.8554	-0.596168	1.24222	-0.45642	0.331143	0.0390816	0.0904593	0.0910692	0.15932	metC; cystathionine beta-lyase [EC:4.4.1.8]
918	K01761	0.211871	-0.200338	0.327583	0.607959	1.7915	0.333384	0.348857	0.156992	0.250241	0.157004	0.245619	E4.4.1.11; methionine-gamma-lyase [EC:4.4.1.11]
919	K01766	-2.20984	-2.99713	-0.756496	2.34853	2.49445	0.903182	0.158241	0.00107052	0.0174642	0.000546319	0.0181524	csdA; cysteine sulfinate desulfinase [EC:4.4.1.-]
920	K01768	-2.39212	-1.31061	-4.61687	-3.20715	3.71905	-0.760234	0.161714	0.00085263	0.0174649	0.000611918	0.0182646	E4.6.1.1; adenylate cyclase [EC:4.6.1.1]
921	K01770	5.89881	6.14656	5.5135	-0.674789	0.852357	-0.805217	0.188286	0.000670867	0.0173517	0.00213306	0.0239627	ispF; 2-C-methyl-D-erythritol 2,4-cyclodiphosphate synthase [EC:4.6.1.12]
922	K01771	-0.774326	0.316587	-1.74939	-2.39277	5.18235	-0.43782	0.287346	0.0095842	0.0343998	0.0365838	0.0825698	plc; 1-phosphatidylinositol phosphodiesterase [EC:4.6.1.13]
923	K01772	0.591693	0.133479	1.02765	0.910342	1.00579	0.85886	0.151143	0.000433881	0.0173517	0.000618167	0.0183478	hemH, FECH; protoporphyrin/coproporphyrin ferrochelatase [EC:4.99.1.1 4.99.1.9]
924	K01775	6.42199	6.5416	6.21257	-0.559907	0.833782	-0.644414	0.233648	0.00679826	0.0274738	0.00767737	0.0324993	alr; alanine racemase [EC:5.1.1.1]
925	K01776	6.23704	6.34253	5.87709	-0.623519	0.858877	-0.719799	0.216	0.00286447	0.0175126	0.0061255	0.0292699	murI; glutamate racemase [EC:5.1.1.3]
926	K01777	1.68911	1.73432	1.68196	0.0689207	1.36206	0.0504541	0.473008	0.892098	0.927771	0.849351	0.897807	prdF; proline racemase [EC:5.1.1.4]
927	K01778	6.38207	6.50299	5.98201	-0.641592	0.872773	-0.751246	0.208286	0.00199667	0.0173542	0.00398672	0.0265633	dapF; diaminopimelate epimerase [EC:5.1.1.7]
928	K01779	3.99497	4.25747	3.86125	-0.334752	0.953714	-0.267105	0.354185	0.801821	0.863238	0.159142	0.248685	racD; aspartate racemase [EC:5.1.1.13]
929	K01782	-3.31484	-4.58409	-2.50982	2.27763	4.1219	0.481226	0.274493	0.0578281	0.11583	0.0297609	0.0723735	fadJ; 3-hydroxyacyl-CoA dehydrogenase / enoyl-CoA hydratase / 3-hydroxybutyryl-CoA epimerase [EC:1.1.1.35 4.2.1.17 5.1.2.3]
930	K01783	6.35009	6.5026	6.01977	-0.637568	0.811282	-0.778678	0.199657	0.00160839	0.017353	0.00280274	0.025177	rpe, RPE; ribulose-phosphate 3-epimerase [EC:5.1.3.1]
931	K01784	6.64835	6.78252	6.22161	-0.664495	0.862999	-0.766423	0.215429	0.00195972	0.0173543	0.00570244	0.0288058	galE, GALE; UDP-glucose 4-epimerase [EC:5.1.3.2]
932	K01785	6.64656	7.00799	6.52674	-0.642077	0.883672	-0.721293	0.213143	0.00183723	0.0173535	0.00513521	0.0280057	galM, GALM; aldose 1-epimerase [EC:5.1.3.3]
933	K01787	4.47713	4.77028	4.38747	-0.390396	1.01592	-0.344676	0.336857	0.0923192	0.166465	0.120467	0.198787	RENBP; N-acylglucosamine 2-epimerase [EC:5.1.3.8]
934	K01788	4.58567	4.85536	4.25151	-0.635995	0.817513	-0.721483	0.216	0.00986862	0.0351787	0.00591284	0.0291992	nanE; N-acylglucosamine-6-phosphate 2-epimerase [EC:5.1.3.9]
935	K01790	6.10404	6.35003	5.79023	-0.615685	0.861344	-0.67905	0.231077	0.00326404	0.018196	0.00714564	0.0314222	rfbC, rmlC; dTDP-4-dehydrorhamnose 3,5-epimerase [EC:5.1.3.13]
936	K01791	5.75326	6.10974	5.42691	-0.759233	1.03987	-0.662661	0.22565	0.00822838	0.0312586	0.00686598	0.0308766	wecB; UDP-N-acetylglucosamine 2-epimerase (non-hydrolysing) [EC:5.1.3.14]
937	K01792	1.15613	1.464	1.05072	-0.205223	2.076	-0.092869	0.457869	0.822377	0.878211	0.726327	0.805737	E5.1.3.15; glucose-6-phosphate 1-epimerase [EC:5.1.3.15]
938	K01799	-4.6912	-4.40378	-5.5306	-0.0867962	6.63724	-0.0120859	0.491859	0.697151	0.770122	0.834931	0.883386	nicE, maiA; maleate isomerase [EC:5.2.1.1]
939	K01801	-8.95428	-9.57199	-8.18233	2.12731	5.86493	0.338191	0.364182	0.212945	0.291194	0.244643	0.327342	nagL; maleylpyruvate isomerase [EC:5.2.1.4]
940	K01802	4.99261	5.2905	4.79159	-0.673773	1.18047	-0.5539	0.268857	0.0106703	0.0370094	0.0224249	0.0618351	E5.2.1.8; peptidylprolyl isomerase [EC:5.2.1.8]
941	K01803	6.383	6.49723	6.05279	-0.647174	0.834791	-0.74151	0.216224	0.00318605	0.0180152	0.00626234	0.0296874	TPI, tpiA; triosephosphate isomerase (TIM) [EC:5.3.1.1]
942	K01804	4.95636	5.35149	4.49588	-0.857364	0.905569	-0.935837	0.16024	0.00029525	0.0173517	0.000673876	0.0183377	araA; L-arabinose isomerase [EC:5.3.1.4]
943	K01805	4.3513	4.62655	4.11873	-0.721049	1.06952	-0.605862	0.24136	0.0113272	0.0384552	0.0115952	0.041376	xylA; xylose isomerase [EC:5.3.1.5]
944	K01807	4.03642	4.28412	3.81782	-0.515713	1.08053	-0.416906	0.324	0.0609742	0.123145	0.0960189	0.165928	rpiA; ribose 5-phosphate isomerase A [EC:5.3.1.6]
945	K01808	6.18095	6.42164	5.97012	-0.701361	0.866135	-0.763248	0.203714	0.00152471	0.017353	0.00292034	0.0253096	rpiB; ribose 5-phosphate isomerase B [EC:5.3.1.6]
946	K01809	5.34399	5.53052	5.24197	-0.518305	0.830756	-0.562928	0.251642	0.0117174	0.0393021	0.0151438	0.0486669	manA, MPI; mannose-6-phosphate isomerase [EC:5.3.1.8]
947	K01810	6.28149	6.37078	5.9637	-0.611954	0.870717	-0.70147	0.238571	0.00421106	0.020519	0.00827541	0.0338165	GPI, pgi; glucose-6-phosphate isomerase [EC:5.3.1.9]
948	K01811	5.40314	6.08825	5.20857	-0.79134	1.09569	-0.741887	0.221651	0.00415465	0.0203788	0.00635399	0.0299332	xylS, yicI; alpha-D-xyloside xylohydrolase [EC:3.2.1.177]
949	K01812	4.70365	5.19407	4.55066	-0.489073	0.925355	-0.522797	0.283062	0.016425	0.0492937	0.0337533	0.0785027	uxaC; glucuronate isomerase [EC:5.3.1.12]
950	K01813	4.11504	4.491	3.94707	-0.500185	1.06763	-0.432907	0.327335	0.038664	0.0898	0.0847239	0.150507	rhaA; L-rhamnose isomerase [EC:5.3.1.14]
951	K01814	6.10837	6.27324	5.74142	-0.728288	0.881248	-0.816005	0.177664	0.000941264	0.0173525	0.00110026	0.0202145	hisA; phosphoribosylformimino-5-aminoimidazole carboxamide ribotide isomerase [EC:5.3.1.16]
952	K01815	4.78144	5.1902	4.36101	-0.623348	1.23743	-0.526262	0.261143	0.0309875	0.0772673	0.0193381	0.0568949	kduI; 4-deoxy-L-threo-5-hexosulose-uronate ketol-isomerase [EC:5.3.1.17]
953	K01816	0.608245	1.00795	0.442393	-0.391059	1.46576	-0.236095	0.39	0.48935	0.606003	0.292784	0.402346	hyi, gip; hydroxypyruvate isomerase [EC:5.3.1.22]
954	K01817	5.75061	5.88664	5.22921	-0.683175	0.877037	-0.745979	0.208571	0.00194643	0.0173537	0.00414254	0.0267372	trpF; phosphoribosylanthranilate isomerase [EC:5.3.1.24]
955	K01818	4.10796	4.5686	3.74659	-0.590393	1.00403	-0.589592	0.271922	0.0191684	0.0548438	0.0303904	0.0737337	fucI; L-fucose/D-arabinose isomerase [EC:5.3.1.25 5.3.1.3]
956	K01819	-2.39575	-2.65476	-1.86339	0.511727	3.77643	0.0971512	0.452	0.832292	0.882313	0.666877	0.757086	E5.3.1.26, lacA, lacB; galactose-6-phosphate isomerase [EC:5.3.1.26]
957	K01820	-9.63293	-8.96165	-10.1009	-0.891858	5.83825	-0.145639	0.435304	0.539337	0.625119	0.491603	0.57523	rhaA; L-rhamnose isomerase / sugar isomerase [EC:5.3.1.14 5.3.1.-]
958	K01821	1.19393	1.10025	1.3355	0.482424	1.59606	0.307804	0.358755	0.0958359	0.171247	0.178943	0.272657	praC, xylH; 4-oxalocrotonate tautomerase [EC:5.3.2.6]
959	K01823	1.14314	1.31725	1.06635	0.282268	1.58161	0.15773	0.45587	0.343478	0.46299	0.661125	0.753742	idi, IDI; isopentenyl-diphosphate Delta-isomerase [EC:5.3.3.2]
960	K01825	-3.31669	-4.5792	-2.52281	2.28837	4.15693	0.484735	0.277921	0.056229	0.113167	0.0293173	0.0716843	fadB; 3-hydroxyacyl-CoA dehydrogenase / enoyl-CoA hydratase / 3-hydroxybutyryl-CoA epimerase / enoyl-CoA isomerase [EC:1.1.1.35 4.2.1.17 5.1.2.3 5.3.3.8]
961	K01826	-8.65788	-9.03588	-8.26031	1.06682	5.3297	0.173885	0.415429	0.457489	0.545952	0.462935	0.550944	hpaF, hpcD; 5-carboxymethyl-2-hydroxymuconate isomerase [EC:5.3.3.10]
962	K01834	5.3641	5.56154	4.86975	-0.73408	1.21396	-0.618701	0.228	0.00445399	0.0211376	0.00745404	0.0321307	PGAM, gpmA; 2,3-bisphosphoglycerate-dependent phosphoglycerate mutase [EC:5.4.2.11]
963	K01835	6.36083	6.47398	5.93427	-0.630549	0.846882	-0.751769	0.200571	0.00159824	0.017353	0.00302797	0.0255151	pgm; phosphoglucomutase [EC:5.4.2.2]
964	K01838	2.29426	2.25122	2.29934	0.0320999	1.2347	0.0244214	0.491003	0.610993	0.713769	0.942289	0.962488	pgmB; beta-phosphoglucomutase [EC:5.4.2.6]
965	K01839	5.33491	5.43503	5.08093	-0.571825	0.827522	-0.607347	0.261714	0.0238242	0.064063	0.0242213	0.0645706	deoB; phosphopentomutase [EC:5.4.2.7]
966	K01840	4.13781	4.54747	4.0202	-0.614673	1.02961	-0.502079	0.27	0.00848403	0.0318994	0.0223492	0.0616471	manB; phosphomannomutase [EC:5.4.2.8]
967	K01841	0.890802	1.0814	0.102581	-1.27943	3.84722	-0.285576	0.367324	0.0384645	0.0893925	0.211397	0.312344	pepM; phosphoenolpyruvate phosphomutase [EC:5.4.2.9]
968	K01843	3.22852	4.13614	2.87651	-1.16432	1.57567	-0.735747	0.213653	0.0020712	0.0173563	0.0060517	0.0293919	kamA; lysine 2,3-aminomutase [EC:5.4.3.2]
969	K01844	-1.47028	-0.712492	-2.47627	-1.65699	2.15492	-0.667066	0.179663	0.0106154	0.0356638	0.00155179	0.0217722	kamD; beta-lysine 5,6-aminomutase alpha subunit [EC:5.4.3.3]
970	K01845	4.17368	4.55467	4.03451	-0.71482	0.860893	-0.774368	0.214	0.00419222	0.0204803	0.00521826	0.0282087	hemL; glutamate-1-semialdehyde 2,1-aminomutase [EC:5.4.3.8]
971	K01846	-4.57332	-7.51706	-3.25848	2.78315	6.51355	0.402976	0.316195	0.104059	0.17682	0.0782106	0.140286	glmS, mutS, mamA; methylaspartate mutase sigma subunit [EC:5.4.99.1]
972	K01847	4.925	5.42584	4.61675	-0.658901	1.43406	-0.428466	0.278777	0.0425924	0.0960414	0.0325596	0.0768477	MUT; methylmalonyl-CoA mutase [EC:5.4.99.2]
973	K01848	1.07904	1.09361	1.06722	-0.165856	1.25924	-0.131478	0.432734	0.313484	0.431171	0.557182	0.66395	E5.4.99.2A, mcmA1; methylmalonyl-CoA mutase, N-terminal domain [EC:5.4.99.2]
974	K01849	1.03038	1.12769	0.97878	-0.454646	1.5854	-0.265212	0.383143	0.206733	0.31077	0.25356	0.359804	E5.4.99.2B, mcmA2; methylmalonyl-CoA mutase, C-terminal domain [EC:5.4.99.2]
975	K01854	5.84559	5.93375	5.71696	-0.619841	0.893219	-0.653579	0.251714	0.00396266	0.0198899	0.0145104	0.0475492	glf; UDP-galactopyranose mutase [EC:5.4.99.9]
976	K01856	-9.52136	-9.57244	-9.47831	0.315134	5.31046	0.052385	0.47158	0.554769	0.636846	0.585524	0.663106	catB; muconate cycloisomerase [EC:5.5.1.1]
977	K01857	-7.57081	-7.78216	-7.26715	1.29705	6.04358	0.208097	0.410454	0.522881	0.615982	0.456528	0.55393	pcaB; 3-carboxy-cis,cis-muconate cycloisomerase [EC:5.5.1.2]
978	K01858	4.32824	4.48572	3.97307	-0.780252	1.19853	-0.622159	0.231077	0.00222063	0.0173554	0.00837731	0.0341643	INO1, ISYNA1; myo-inositol-1-phosphate synthase [EC:5.5.1.4]
979	K01866	6.25687	6.36689	5.93212	-0.597267	0.859084	-0.687261	0.217143	0.00295151	0.0176083	0.00548073	0.0282698	YARS, tyrS; tyrosyl-tRNA synthetase [EC:6.1.1.1]
980	K01867	6.25022	6.3646	5.90321	-0.615047	0.86367	-0.728451	0.213939	0.00264976	0.0173787	0.00492437	0.0275376	WARS, trpS; tryptophanyl-tRNA synthetase [EC:6.1.1.2]
981	K01868	6.25354	6.36594	5.90464	-0.603388	0.84461	-0.718834	0.227078	0.00292102	0.0175742	0.00637918	0.029734	TARS, thrS; threonyl-tRNA synthetase [EC:6.1.1.3]
982	K01869	6.24985	6.36352	5.87872	-0.596902	0.861954	-0.730395	0.21651	0.00244752	0.0173557	0.00470602	0.0272982	LARS, leuS; leucyl-tRNA synthetase [EC:6.1.1.4]
983	K01870	6.25002	6.36017	5.87902	-0.606587	0.859565	-0.706987	0.219143	0.00263056	0.0173748	0.00535473	0.0280552	IARS, ileS; isoleucyl-tRNA synthetase [EC:6.1.1.5]
984	K01872	6.69353	6.87413	6.52297	-0.630328	0.870686	-0.6648	0.227078	0.00464027	0.021621	0.0073462	0.0318321	AARS, alaS; alanyl-tRNA synthetase [EC:6.1.1.7]
985	K01873	6.25142	6.36584	5.87973	-0.647488	0.849555	-0.747884	0.212796	0.00259775	0.0173688	0.00553767	0.0283366	VARS, valS; valyl-tRNA synthetase [EC:6.1.1.9]
986	K01874	6.29766	6.44046	5.95138	-0.654292	0.832389	-0.754565	0.207429	0.00233813	0.0173544	0.00421093	0.0268847	MARS, metG; methionyl-tRNA synthetase [EC:6.1.1.10]
987	K01875	6.28643	6.42304	5.95405	-0.637891	0.862055	-0.747696	0.201657	0.00193618	0.017354	0.00332544	0.0259152	SARS, serS; seryl-tRNA synthetase [EC:6.1.1.11]
988	K01876	6.41722	6.57413	6.05406	-0.607555	0.826821	-0.763178	0.193373	0.00188785	0.0173537	0.00257756	0.0248372	aspS; aspartyl-tRNA synthetase [EC:6.1.1.12]
989	K01878	2.53269	2.73178	2.43737	-0.12845	1.1988	-0.105082	0.448	0.673222	0.764621	0.629589	0.727323	glyQ; glycyl-tRNA synthetase alpha chain [EC:6.1.1.14]
990	K01879	2.65545	2.7401	2.43869	-0.158826	1.26694	-0.122541	0.4513	0.639321	0.73739	0.648866	0.743294	glyS; glycyl-tRNA synthetase beta chain [EC:6.1.1.14]
991	K01880	5.99885	6.24189	5.7036	-0.637929	0.88022	-0.742682	0.188518	0.00141684	0.0173529	0.00222018	0.0241755	GARS, glyS1; glycyl-tRNA synthetase [EC:6.1.1.14]
992	K01881	6.23664	6.35998	5.87829	-0.599968	0.86374	-0.699681	0.216857	0.00304962	0.0177692	0.00550491	0.0282891	PARS, proS; prolyl-tRNA synthetase [EC:6.1.1.15]
993	K01883	6.2498	6.36426	5.87909	-0.609759	0.862802	-0.708419	0.216571	0.00264454	0.0173761	0.00582192	0.0287569	CARS, cysS; cysteinyl-tRNA synthetase [EC:6.1.1.16]
994	K01884	-10.3994	-10.0748	-10.6081	-0.429326	4.55133	-0.077149	0.461011	0.483018	0.569397	0.490714	0.571685	cysS1; cysteinyl-tRNA synthetase, unknown class [EC:6.1.1.16]
995	K01885	6.43447	6.65963	6.13709	-0.665127	0.869926	-0.73495	0.190231	0.00185854	0.0173533	0.00209443	0.0239346	EARS, gltX; glutamyl-tRNA synthetase [EC:6.1.1.17]
996	K01886	5.95161	6.09277	5.64736	-0.58772	0.902294	-0.674824	0.221365	0.00409752	0.020235	0.00713811	0.0314135	QARS, glnS; glutaminyl-tRNA synthetase [EC:6.1.1.18]
997	K01887	6.24559	6.36804	5.88197	-0.632404	0.847499	-0.736674	0.212571	0.00269587	0.0173959	0.00490441	0.0275162	RARS, argS; arginyl-tRNA synthetase [EC:6.1.1.19]
998	K01889	6.25044	6.41326	5.87878	-0.66654	0.841334	-0.750444	0.193373	0.00145881	0.0173533	0.00284517	0.0252799	FARSA, pheS; phenylalanyl-tRNA synthetase alpha chain [EC:6.1.1.20]
999	K01890	6.28783	6.42494	5.95687	-0.643316	0.848928	-0.732752	0.207655	0.0019861	0.0173543	0.00391071	0.0265288	FARSB, pheT; phenylalanyl-tRNA synthetase beta chain [EC:6.1.1.20]
1000	K01892	6.24945	6.36166	5.87707	-0.609124	0.863916	-0.730536	0.218223	0.00254548	0.0173614	0.00487723	0.0274949	HARS, hisS; histidyl-tRNA synthetase [EC:6.1.1.21]
1001	K01893	5.93162	6.12396	5.63981	-0.583041	0.838854	-0.693763	0.207429	0.00418343	0.0204533	0.00364002	0.0261722	NARS, asnS; asparaginyl-tRNA synthetase [EC:6.1.1.22]
1002	K01894	-0.0454838	-0.407662	0.0288465	0.130433	1.647	0.0789295	0.469294	0.931924	0.95457	0.827486	0.881419	gluQ; glutamyl-Q tRNA(Asp) synthetase [EC:6.1.1.-]
1003	K01895	4.04084	4.50726	3.84857	-0.608723	0.924592	-0.549948	0.201429	0.00330248	0.0183275	0.00359396	0.0260626	ACSS, acs; acetyl-CoA synthetase [EC:6.2.1.1]
1004	K01897	6.61079	6.91638	6.43926	-0.637302	1.00104	-0.617211	0.222222	0.00317342	0.0180016	0.00625005	0.0297685	ACSL, fadD; long-chain acyl-CoA synthetase [EC:6.2.1.3]
1005	K01902	3.45166	3.59591	2.78969	-0.744032	1.28139	-0.536715	0.27992	0.0136841	0.0436245	0.0384408	0.0851762	sucD; succinyl-CoA synthetase alpha subunit [EC:6.2.1.5]
1006	K01903	3.40135	3.58631	2.78561	-0.718328	1.30527	-0.50509	0.286571	0.0155489	0.0475118	0.0399552	0.0872766	sucC; succinyl-CoA synthetase beta subunit [EC:6.2.1.5]
1007	K01905	-9.17633	-7.60887	-9.95929	-2.79565	8.38718	-0.351106	0.346187	0.164967	0.245424	0.205732	0.28642	acdA; acetate---CoA ligase (ADP-forming) subunit alpha [EC:6.2.1.13]
1008	K01906	0.976921	0.9086	1.34111	-0.064014	2.31745	-0.0262171	0.488857	0.847902	0.89639	0.894204	0.929795	bioW; 6-carboxyhexanoate--CoA ligase [EC:6.2.1.14]
1009	K01908	-4.21664	-4.90564	-2.89896	1.93051	4.53252	0.370052	0.328192	0.184851	0.2759	0.10455	0.176427	prpE; propionyl-CoA synthetase [EC:6.2.1.17]
1010	K01909	-7.81518	-3.33074	-9.69028	-4.93467	6.89403	-0.634786	0.249357	0.0282819	0.063521	0.0229467	0.0588519	mbtM; long-chain-fatty-acid--[acyl-carrier-protein] ligase [EC:6.2.1.20]
1011	K01910	1.01854	1.22869	0.842539	-0.180595	1.20676	-0.122713	0.442159	0.859882	0.904899	0.603157	0.703563	citC; [citrate (pro-3S)-lyase] ligase [EC:6.2.1.22]
1012	K01911	3.97788	3.93212	3.97831	-0.272199	1.21113	-0.199691	0.417024	0.30739	0.425136	0.421975	0.536635	menE; O-succinylbenzoic acid---CoA ligase [EC:6.2.1.26]
1013	K01912	5.41752	5.869	5.01802	-0.75124	1.02202	-0.701022	0.203714	0.00266141	0.0174268	0.00373923	0.0262918	paaK; phenylacetate-CoA ligase [EC:6.2.1.30]
1014	K01914	5.69376	5.89088	5.44378	-0.529166	0.861954	-0.582131	0.271143	0.0125416	0.0411461	0.0232026	0.0629613	asnA; aspartate--ammonia ligase [EC:6.3.1.1]
1015	K01915	7.3931	7.57811	7.06985	-0.617351	0.854132	-0.724604	0.202857	0.00178375	0.0173533	0.00311955	0.025556	glnA, GLUL; glutamine synthetase [EC:6.3.1.2]
1016	K01916	1.67563	1.64609	1.71181	0.258111	1.48736	0.153178	0.426	0.386811	0.507352	0.512691	0.624059	nadE; NAD+ synthase [EC:6.3.1.5]
1017	K01918	5.17214	5.50772	4.9864	-0.620762	0.964834	-0.602702	0.214857	0.00397839	0.0199279	0.00565512	0.0287445	panC; pantoate--beta-alanine ligase [EC:6.3.2.1]
1018	K01919	3.34213	3.59484	2.91435	-0.669674	1.33428	-0.456678	0.334761	0.0575591	0.118241	0.121747	0.200351	gshA; glutamate--cysteine ligase [EC:6.3.2.2]
1019	K01920	-3.32759	-4.56575	-2.52003	2.23285	4.09804	0.477311	0.276778	0.0633961	0.122727	0.0303488	0.073248	gshB; glutathione synthase [EC:6.3.2.3]
1020	K01921	6.25512	6.38641	5.86962	-0.599513	0.833436	-0.725929	0.222508	0.00245671	0.0173559	0.00600917	0.0292156	ddl; D-alanine-D-alanine ligase [EC:6.3.2.4]
1021	K01922	-1.1711	-0.81257	-1.34592	-0.494131	2.18961	-0.21317	0.382	0.309397	0.426238	0.266393	0.372989	PPCS, COAB; phosphopantothenate---cysteine ligase (ATP) [EC:6.3.2.51]
1022	K01923	6.22784	6.36192	5.87926	-0.61912	0.845089	-0.738156	0.207084	0.00232005	0.0173544	0.00360238	0.0261703	purC; phosphoribosylaminoimidazole-succinocarboxamide synthase [EC:6.3.2.6]
1023	K01924	6.24956	6.35773	5.87793	-0.621186	0.862281	-0.738002	0.214225	0.00267283	0.0173828	0.00565868	0.0285303	murC; UDP-N-acetylmuramate--alanine ligase [EC:6.3.2.8]
1024	K01925	6.24999	6.36078	5.87745	-0.592102	0.865325	-0.720716	0.210286	0.00261868	0.0173677	0.005498	0.0282844	murD; UDP-N-acetylmuramoylalanine--D-glutamate ligase [EC:6.3.2.9]
1025	K01926	5.94717	6.15884	5.63393	-0.592446	0.85539	-0.659926	0.23022	0.00716546	0.0284447	0.00957252	0.0367212	rex; redox-sensing transcriptional repressor
1026	K01928	6.31903	6.41842	5.99291	-0.532921	0.853166	-0.655289	0.254499	0.00704336	0.0281144	0.0173383	0.0530148	murE; UDP-N-acetylmuramoyl-L-alanyl-D-glutamate--2,6-diaminopimelate ligase [EC:6.3.2.13]
1027	K01929	6.28458	6.40583	5.88151	-0.616548	0.854074	-0.738927	0.198229	0.00226716	0.0173544	0.00336413	0.0259647	murF; UDP-N-acetylmuramoyl-tripeptide--D-alanyl-D-alanine ligase [EC:6.3.2.10]
1028	K01933	6.2262	6.36079	5.87726	-0.650078	0.83739	-0.742699	0.201143	0.0022014	0.0173544	0.0034007	0.0259154	purM; phosphoribosylformylglycinamidine cyclo-ligase [EC:6.3.3.1]
1029	K01934	6.27888	6.44314	5.92791	-0.65198	0.862325	-0.772307	0.203143	0.00189968	0.0173538	0.00376557	0.0263822	MTHFS; 5-formyltetrahydrofolate cyclo-ligase [EC:6.3.3.2]
1030	K01935	4.3006	4.62705	4.1691	-0.522853	1.08644	-0.469322	0.292488	0.0324055	0.0796276	0.0474295	0.0977902	bioD; dethiobiotin synthetase [EC:6.3.3.3]
1031	K01937	6.22441	6.3401	5.79926	-0.615723	0.861323	-0.717222	0.216224	0.0022888	0.0173544	0.005595	0.0284846	pyrG, CTPS; CTP synthase [EC:6.3.4.2]
1032	K01938	6.23121	6.34238	5.87335	-0.627297	0.868533	-0.711035	0.225935	0.00327024	0.0182028	0.00772414	0.0325587	fhs; formate--tetrahydrofolate ligase [EC:6.3.4.3]
1033	K01939	6.26355	6.41611	5.8892	-0.608416	0.829511	-0.757083	0.207143	0.00192225	0.0173535	0.00400509	0.0266427	purA, ADSS; adenylosuccinate synthase [EC:6.3.4.4]
1034	K01940	6.20076	6.3191	5.8687	-0.65514	0.862111	-0.747685	0.184519	0.00157045	0.017353	0.00167847	0.0226575	argG, ASS1; argininosuccinate synthase [EC:6.3.4.5]
1035	K01941	-10.1101	-10.1104	-10.1097	0.325526	5.01877	0.0601855	0.471429	0.509522	0.598673	0.548409	0.63	E6.3.4.6; urea carboxylase [EC:6.3.4.6]
1036	K01945	6.229	6.36515	5.87818	-0.645389	0.857467	-0.747192	0.195429	0.00202932	0.0173542	0.0029026	0.0253243	purD; phosphoribosylamine---glycine ligase [EC:6.3.4.13]
1037	K01950	6.09318	6.3467	5.75915	-0.701651	0.881596	-0.784342	0.185376	0.0010936	0.0173525	0.00176615	0.0230419	E6.3.5.1, NADSYN1, QNS1, nadE; NAD+ synthase (glutamine-hydrolysing) [EC:6.3.5.1]
1038	K01951	6.40053	6.65584	6.19525	-0.639816	0.82725	-0.782114	0.192571	0.00122448	0.0173525	0.00256009	0.0246978	guaA, GMPS; GMP synthase (glutamine-hydrolysing) [EC:6.3.5.2]
1039	K01952	6.28642	6.47671	5.88664	-0.634131	0.755172	-0.76904	0.20337	0.00259662	0.0173679	0.00335808	0.0258228	purL, PFAS; phosphoribosylformylglycinamidine synthase [EC:6.3.5.3]
1040	K01953	6.37971	6.5975	6.02117	-0.620359	0.875396	-0.678461	0.225714	0.00461053	0.0215433	0.00686498	0.0310675	asnB, ASNS; asparagine synthase (glutamine-hydrolysing) [EC:6.3.5.4]
1041	K01955	6.99934	7.13432	6.69496	-0.577315	0.853954	-0.672719	0.23936	0.00390555	0.0197463	0.0124089	0.0430422	carB, CPA2; carbamoyl-phosphate synthase large subunit [EC:6.3.5.5]
1042	K01956	6.24204	6.35885	5.86199	-0.594782	0.839562	-0.696345	0.224857	0.00377102	0.0194104	0.00671593	0.0304438	carA, CPA1; carbamoyl-phosphate synthase small subunit [EC:6.3.5.5]
1043	K01958	3.36577	3.63494	2.90002	-0.80084	0.846873	-0.864506	0.171429	0.00177964	0.0173542	0.00119321	0.0206004	PC, pyc; pyruvate carboxylase [EC:6.4.1.1]
1044	K01959	-7.83544	-8.15587	-7.33066	0.922187	6.97588	0.121852	0.447429	0.577394	0.665509	0.602628	0.68625	pycA; pyruvate carboxylase subunit A [EC:6.4.1.1]
1045	K01960	4.73152	5.29661	4.4854	-0.754988	1.38329	-0.502447	0.279634	0.0138394	0.0439723	0.031428	0.0752851	pycB; pyruvate carboxylase subunit B [EC:6.4.1.1]
1046	K01961	5.9615	6.24217	5.80478	-0.566065	0.832438	-0.70258	0.236218	0.00445751	0.0211485	0.00947141	0.0365352	accC; acetyl-CoA carboxylase, biotin carboxylase subunit [EC:6.4.1.2 6.3.4.14]
1047	K01962	4.6454	4.88002	4.55497	-0.298919	0.841583	-0.315762	0.346571	0.370507	0.491035	0.139805	0.223892	accA; acetyl-CoA carboxylase carboxyl transferase subunit alpha [EC:6.4.1.2 2.1.3.15]
1048	K01963	5.58542	5.89039	5.30171	-0.623529	0.727203	-0.740771	0.211714	0.00613436	0.0256776	0.00517135	0.0279949	accD; acetyl-CoA carboxylase carboxyl transferase subunit beta [EC:6.4.1.2 2.1.3.15]
1049	K01966	3.87577	4.37589	3.55898	-0.531589	1.62152	-0.304698	0.346286	0.132173	0.219345	0.13992	0.224135	PCCB, pccB; propionyl-CoA carboxylase beta chain [EC:6.4.1.3 2.1.3.15]
1050	K01969	-10.3787	-9.88365	-10.7102	-0.906967	4.66109	-0.165451	0.409597	0.394121	0.476951	0.407316	0.485217	E6.4.1.4B; 3-methylcrotonyl-CoA carboxylase beta subunit [EC:6.4.1.4]
1051	K01971	-0.488457	-0.341012	-0.700493	-0.216083	2.29319	-0.090744	0.45387	0.829379	0.882792	0.722072	0.801328	ligD; bifunctional non-homologous end joining protein LigD [EC:6.5.1.1]
1052	K01972	6.26098	6.37681	5.88129	-0.594415	0.809456	-0.721896	0.227649	0.00302799	0.0177256	0.00610608	0.0292779	E6.5.1.2, ligA, ligB; DNA ligase (NAD+) [EC:6.5.1.2]
1053	K01974	-1.67956	-2.09441	-0.733564	1.62221	3.37068	0.417821	0.31391	0.0540556	0.112705	0.0693914	0.128876	RTCA, rtcA; RNA 3'-terminal phosphate cyclase (ATP) [EC:6.5.1.4]
1054	K01975	0.829668	0.967384	0.416006	-0.671419	1.72263	-0.424121	0.314196	0.0271149	0.0702076	0.0798316	0.143267	thpR; RNA 2',3'-cyclic 3'-phosphodiesterase [EC:3.1.4.58]
1055	K01989	6.0229	6.33698	5.66536	-0.668522	0.78315	-0.757215	0.211939	0.00621906	0.0259101	0.00392962	0.0264706	ABC.X4.S; putative ABC transport system substrate-binding protein
1056	K01990	9.06971	9.30336	8.71744	-0.674152	0.806254	-0.782976	0.205084	0.0028317	0.0174414	0.00356552	0.0260903	ABC-2.A; ABC-2 type transport system ATP-binding protein
1057	K01991	5.1358	5.50334	4.89585	-0.663653	1.15511	-0.525455	0.283633	0.0155786	0.0475781	0.0360621	0.0818294	ABC-2.OM, wza; polysaccharide biosynthesis/export protein
1058	K01992	8.73312	8.9869	8.41741	-0.622599	0.816746	-0.747985	0.218509	0.00448456	0.0212149	0.0048569	0.027506	ABC-2.P; ABC-2 type transport system permease protein
1059	K01993	5.32983	5.69391	5.14731	-0.581048	1.18409	-0.465106	0.287918	0.0171477	0.0507739	0.0412781	0.089139	ABC-2.TX; HlyD family secretion protein
1060	K01994	0.586413	0.434555	0.945094	0.762219	2.44972	0.320903	0.312482	0.257718	0.369342	0.0628747	0.11967	gerE; LuxR family transcriptional regulator, transcriptional regulator of spore coat protein
1061	K01995	5.34438	5.96596	5.06567	-0.874118	0.85227	-0.929083	0.173429	0.000443901	0.0173517	0.00110631	0.0201538	livG; branched-chain amino acid transport system ATP-binding protein
1062	K01996	5.34433	5.97098	5.06827	-0.877268	0.85412	-0.931802	0.174522	0.000446968	0.0173517	0.00112714	0.0202689	livF; branched-chain amino acid transport system ATP-binding protein
1063	K01997	5.34481	6.0204	5.06618	-0.872383	0.884608	-0.91302	0.182	0.00049372	0.0173517	0.00115793	0.0204151	livH; branched-chain amino acid transport system permease protein
1064	K01998	5.34306	6.01389	5.08129	-0.908913	0.868127	-0.926791	0.171665	0.000497825	0.0173517	0.00110341	0.0201541	livM; branched-chain amino acid transport system permease protein
1065	K01999	5.60212	6.08772	5.23215	-0.946115	0.872212	-0.957087	0.168	0.000278995	0.0173517	0.000882837	0.0191758	livK; branched-chain amino acid transport system substrate-binding protein
1066	K02000	1.27287	1.90172	1.13631	-0.747213	1.70418	-0.406012	0.254	0.0383665	0.0893502	0.0213816	0.059295	proV; glycine betaine/proline transport system ATP-binding protein [EC:3.6.3.32]
1067	K02001	1.16356	1.66767	0.956319	-0.900657	1.80705	-0.482094	0.245644	0.030235	0.0758714	0.0119857	0.0422724	proW; glycine betaine/proline transport system permease protein
1068	K02002	1.26311	1.89005	1.09629	-0.733327	1.67758	-0.399687	0.257143	0.0318387	0.0786652	0.0159591	0.0499803	proX; glycine betaine/proline transport system substrate-binding protein
1069	K02003	8.9805	9.2066	8.72372	-0.597611	0.852211	-0.757208	0.199086	0.00177043	0.0173533	0.00296113	0.0253724	ABC.CD.A; putative ABC transport system ATP-binding protein
1070	K02004	9.09821	9.3002	8.86704	-0.604055	0.851386	-0.744167	0.202286	0.00192197	0.017354	0.00383711	0.0264093	ABC.CD.P; putative ABC transport system permease protein
1071	K02005	6.08072	6.4934	5.88188	-0.679775	1.02866	-0.606046	0.243359	0.00594694	0.0251913	0.0129167	0.0442059	ABC.CD.TX; HlyD family secretion protein
1072	K02006	4.25477	4.50752	3.99029	-0.769859	0.813286	-0.862087	0.165096	0.00166838	0.017353	0.000760019	0.0185579	cbiO; cobalt/nickel transport system ATP-binding protein
1073	K02007	4.25833	4.59853	3.97604	-0.800881	0.791241	-0.91917	0.160526	0.000886413	0.0173518	0.00049498	0.0178617	cbiM; cobalt/nickel transport system permease protein
1074	K02008	4.26245	4.6002	3.97541	-0.827193	0.798378	-0.935156	0.159714	0.00088455	0.0173524	0.00054297	0.0179428	cbiQ; cobalt/nickel transport system permease protein
1075	K02009	2.77641	2.95666	2.66258	-0.394597	0.967049	-0.352994	0.310571	0.11537	0.197354	0.0602431	0.115923	cbiN; cobalt/nickel transport protein
1076	K02010	3.96687	4.18081	3.44476	-0.648448	0.790379	-0.66543	0.263143	0.0203881	0.0572591	0.0210031	0.0593616	afuC, fbpC; iron(III) transport system ATP-binding protein [EC:3.6.3.30]
1077	K02011	2.91348	3.21921	2.62416	-0.655705	1.05963	-0.52871	0.246286	0.0561617	0.116234	0.015458	0.0494524	afuB, fbpB; iron(III) transport system permease protein
1078	K02012	3.2603	3.62216	3.0388	-0.45402	0.884601	-0.413303	0.301342	0.135688	0.223761	0.0525778	0.105051	afuA, fbpA; iron(III) transport system substrate-binding protein
1079	K02013	7.07409	7.25469	6.83761	-0.539198	0.789425	-0.67418	0.235647	0.00469661	0.021767	0.00976032	0.0371704	ABC.FEV.A; iron complex transport system ATP-binding protein [EC:3.6.3.34]
1080	K02014	6.77814	6.97339	6.42994	-0.631556	1.16093	-0.492822	0.275064	0.00955855	0.0345256	0.0276009	0.0697092	TC.FEV.OM; iron complex outermembrane recepter protein
1081	K02015	7.17161	7.38457	6.91586	-0.466155	0.793836	-0.552475	0.267352	0.0155775	0.0475478	0.0254208	0.0663567	ABC.FEV.P; iron complex transport system permease protein
1082	K02016	7.05277	7.33108	6.75984	-0.575058	0.816104	-0.688195	0.219652	0.00351918	0.0187959	0.00690718	0.0309338	ABC.FEV.S; iron complex transport system substrate-binding protein
1083	K02017	5.24035	5.44084	5.05562	-0.732067	0.969385	-0.693844	0.228	0.00645986	0.0265626	0.0076321	0.0324481	modC; molybdate transport system ATP-binding protein [EC:3.6.3.29]
1084	K02018	5.25159	5.46034	5.07614	-0.741968	0.954527	-0.716679	0.22565	0.00698132	0.0279552	0.00772763	0.0326944	modB; molybdate transport system permease protein
1085	K02019	2.66954	2.89522	2.35731	-0.522532	1.06467	-0.500457	0.289143	0.0343421	0.0827603	0.0381952	0.0847766	modE; molybdate transport system regulatory protein
1086	K02020	5.25251	5.46664	5.07729	-0.734811	0.950857	-0.710097	0.228506	0.00679721	0.0274678	0.00767239	0.032542	modA; molybdate transport system substrate-binding protein
1087	K02021	-10.3412	-10.0772	-10.5104	-0.297982	4.33808	-0.062949	0.468723	0.506154	0.59089	0.517416	0.598768	ABC.MR; putative ABC transport system ATP-binding protein
1088	K02022	1.51282	2.23598	0.629682	-1.76219	3.50625	-0.353672	0.294	0.0158076	0.0479231	0.0495604	0.100759	ABC.MR.TX; HlyD family secretion protein
1089	K02024	-2.82856	-4.53737	-2.14673	2.2248	4.31099	0.461834	0.288857	0.0624398	0.122331	0.0389469	0.0856886	lamB; maltoporin
1090	K02025	7.46865	7.70517	7.10066	-0.646148	0.894542	-0.713335	0.239429	0.00436407	0.0209107	0.0106253	0.0391559	ABC.MS.P; multiple sugar transport system permease protein
1091	K02026	7.41479	7.63265	7.03115	-0.640824	0.881852	-0.70783	0.236	0.00448867	0.0212301	0.00932973	0.0362345	ABC.MS.P1; multiple sugar transport system permease protein
1092	K02027	7.23402	7.47246	6.94448	-0.612162	0.908198	-0.664905	0.236789	0.00665291	0.0270861	0.0101536	0.0381836	ABC.MS.S; multiple sugar transport system substrate-binding protein
1093	K02028	7.0635	7.33404	6.55256	-0.690032	0.785658	-0.813143	0.207084	0.00171738	0.0173533	0.00402786	0.0266125	ABC.PA.A; polar amino acid transport system ATP-binding protein [EC:3.6.3.21]
1094	K02029	6.90381	7.17822	6.45073	-0.73673	0.832467	-0.814081	0.212796	0.00167707	0.0173533	0.00411749	0.0267006	ABC.PA.P; polar amino acid transport system permease protein
1095	K02030	7.57605	7.87291	7.15509	-0.721829	0.80564	-0.841372	0.198515	0.00142139	0.017353	0.00285606	0.0252212	ABC.PA.S; polar amino acid transport system substrate-binding protein
1096	K02031	5.21053	5.66978	4.92389	-0.747197	0.77409	-0.896919	0.174	0.000721142	0.0173518	0.00131435	0.0211234	ABC.PE.A; peptide/nickel transport system ATP-binding protein
1097	K02032	6.35156	6.63264	5.9725	-0.66295	0.84944	-0.781232	0.205941	0.0016341	0.017353	0.00325849	0.0257511	ABC.PE.A1; peptide/nickel transport system ATP-binding protein
1098	K02033	6.62949	6.93731	6.32428	-0.618683	0.822649	-0.746824	0.218509	0.00335205	0.0183891	0.00515021	0.0280014	ABC.PE.P; peptide/nickel transport system permease protein
1099	K02034	6.56188	6.86061	6.24749	-0.615473	0.829071	-0.728967	0.218	0.00320872	0.0180655	0.00589345	0.0291085	ABC.PE.P1; peptide/nickel transport system permease protein
1100	K02035	6.54754	6.88162	6.10785	-0.646228	0.791717	-0.784279	0.213653	0.00213778	0.0173543	0.00487138	0.0275781	ABC.PE.S; peptide/nickel transport system substrate-binding protein
1101	K02036	6.23882	6.3668	5.82677	-0.59136	0.841953	-0.687998	0.237075	0.00491062	0.0223416	0.0122717	0.0427569	pstB; phosphate transport system ATP-binding protein [EC:3.6.3.27]
1102	K02037	6.17355	6.29634	5.79142	-0.577258	0.871276	-0.666481	0.241429	0.00392308	0.0197868	0.0114844	0.0410676	pstC; phosphate transport system permease protein
1103	K02038	6.18715	6.29462	5.7928	-0.586806	0.864196	-0.689807	0.239714	0.00356039	0.0188997	0.0102406	0.0382591	pstA; phosphate transport system permease protein
1104	K02039	6.11688	6.2452	5.74275	-0.611209	0.870529	-0.702675	0.227714	0.00354443	0.0188573	0.00692236	0.0309683	phoU; phosphate transport system protein
1105	K02040	6.32833	6.6058	6.13167	-0.640075	0.847961	-0.766484	0.206571	0.00132477	0.017353	0.00413081	0.0267389	pstS; phosphate transport system substrate-binding protein
1106	K02041	-0.565434	-0.358463	-0.93809	0.0205437	2.06727	0.00892888	0.494857	0.778098	0.844937	0.90765	0.938004	phnC; phosphonate transport system ATP-binding protein [EC:3.6.3.28]
1107	K02042	0.153434	0.317158	-0.0897577	-0.216233	2.14481	-0.0877439	0.468438	0.928342	0.952343	0.75376	0.827055	phnE; phosphonate transport system permease protein
1108	K02043	-3.27232	-4.33697	-2.52769	1.94838	3.75805	0.451402	0.290857	0.101746	0.17561	0.0486167	0.0994699	phnF; GntR family transcriptional regulator, phosphonate transport system regulatory protein
1109	K02044	0.0648873	0.202407	-0.117296	-0.0971737	1.94587	-0.0450117	0.481143	0.948777	0.966076	0.837513	0.889043	phnD; phosphonate transport system substrate-binding protein
1110	K02045	3.99547	4.15827	3.46944	-0.788418	0.864661	-0.811311	0.17	0.00076228	0.0173517	0.0011055	0.0202731	cysA; sulfate transport system ATP-binding protein [EC:3.6.3.25]
1111	K02046	2.68697	2.97964	2.24509	-0.96689	1.16528	-0.73823	0.208286	0.00195853	0.0173563	0.00447152	0.0271473	cysU; sulfate transport system permease protein
1112	K02047	2.68227	2.97805	2.24634	-0.940979	1.15031	-0.721536	0.211654	0.00197135	0.0173549	0.00450316	0.0271909	cysW; sulfate transport system permease protein
1113	K02048	2.78103	2.98612	2.2667	-0.799589	1.08077	-0.681621	0.230857	0.0020832	0.017361	0.008103	0.0336738	cysP, sbp; sulfate transport system substrate-binding protein
1114	K02049	6.01235	6.45789	5.73952	-0.690375	0.857579	-0.737611	0.217652	0.00474075	0.0218896	0.00519398	0.0279129	ABC.SN.A; NitT/TauT family transport system ATP-binding protein
1115	K02050	6.1483	6.59673	5.8822	-0.677976	0.800433	-0.73027	0.217714	0.00622803	0.0259373	0.00507553	0.0278573	ABC.SN.P; NitT/TauT family transport system permease protein
1116	K02051	6.15766	6.58338	5.82249	-0.756457	0.843779	-0.784296	0.221143	0.0042344	0.0205796	0.00524186	0.028096	ABC.SN.S; NitT/TauT family transport system substrate-binding protein
1117	K02052	3.32172	3.59666	2.76559	-0.663549	1.48613	-0.372471	0.323336	0.0344117	0.0830113	0.094174	0.163499	ABC.SP.A; putative spermidine/putrescine transport system ATP-binding protein
1118	K02053	3.25042	3.46857	2.78879	-0.635419	1.3102	-0.430671	0.308857	0.0279341	0.0718602	0.0658847	0.123923	ABC.SP.P; putative spermidine/putrescine transport system permease protein
1119	K02054	3.08872	3.36756	2.64869	-0.755449	1.33096	-0.515657	0.280857	0.0156767	0.0477772	0.0353519	0.0808396	ABC.SP.P1; putative spermidine/putrescine transport system permease protein
1120	K02055	3.22206	3.47145	2.76036	-0.689834	1.29337	-0.47633	0.284857	0.0187979	0.0541231	0.0417506	0.089794	ABC.SP.S; putative spermidine/putrescine transport system substrate-binding protein
1121	K02056	6.27371	6.49547	5.72833	-0.729695	0.83997	-0.838286	0.173714	0.00119707	0.0173525	0.00152254	0.0221232	ABC.SS.A; simple sugar transport system ATP-binding protein [EC:3.6.3.17]
1122	K02057	7.08528	7.31643	6.55697	-0.802813	0.808319	-0.911091	0.172571	0.000662028	0.0173517	0.000866751	0.0192814	ABC.SS.P; simple sugar transport system permease protein
1123	K02058	4.8084	5.21475	4.43753	-0.765959	0.834031	-0.829995	0.192802	0.00102112	0.0173525	0.00236556	0.0244233	ABC.SS.S; simple sugar transport system substrate-binding protein
1124	K02062	-2.20007	-2.99671	-0.765918	2.3542	2.50041	0.900358	0.155955	0.00108157	0.017466	0.000535511	0.0181711	thiQ; thiamine transport system ATP-binding protein
1125	K02063	-2.08542	-2.82492	-0.765949	2.12664	2.58296	0.751508	0.192857	0.00434946	0.0214418	0.00246739	0.0238655	thiP; thiamine transport system permease protein
1126	K02064	-1.99492	-2.81359	-0.76089	2.12963	2.56558	0.761974	0.186571	0.00404382	0.0207797	0.00223647	0.0233322	thiB, tbpA; thiamine transport system substrate-binding protein
1127	K02065	4.35744	4.6524	4.12536	-0.590102	1.11102	-0.483703	0.267067	0.0101665	0.0358763	0.0239192	0.0640967	mlaF, linL, mkl; phospholipid/cholesterol/gamma-HCH transport system ATP-binding protein
1128	K02066	4.35765	4.62594	4.11605	-0.511017	1.04873	-0.449264	0.291429	0.0172696	0.0510269	0.0480318	0.0986063	mlaE, linK; phospholipid/cholesterol/gamma-HCH transport system permease protein
1129	K02067	4.37774	4.66551	4.13778	-0.50876	1.08892	-0.407986	0.307626	0.0263049	0.0688829	0.0677699	0.126586	mlaD, linM; phospholipid/cholesterol/gamma-HCH transport system substrate-binding protein
1130	K02068	4.11662	4.48681	3.63991	-0.794025	1.2699	-0.583322	0.260783	0.016883	0.0502478	0.0201882	0.0582412	ABC.X2.A; putative ABC transport system ATP-binding protein
1131	K02069	4.22234	4.55197	3.66006	-0.745288	1.2348	-0.538204	0.269637	0.0263773	0.0690179	0.0265007	0.0681523	ABC.X2.P; putative ABC transport system permease protein
1132	K02071	5.64985	6.00253	5.2975	-0.690646	0.751109	-0.818327	0.185143	0.0019538	0.0173541	0.00182414	0.0231091	metN; D-methionine transport system ATP-binding protein
1133	K02072	5.65145	6.00036	5.2986	-0.697494	0.764382	-0.808306	0.191088	0.00193118	0.0173541	0.0017955	0.0230317	metI; D-methionine transport system permease protein
1134	K02073	5.75146	6.10708	5.40878	-0.66868	0.809416	-0.757543	0.230857	0.00618772	0.0258312	0.00770217	0.0326606	metQ; D-methionine transport system substrate-binding protein
1135	K02074	2.97992	3.20446	2.20563	-0.97397	2.04978	-0.398468	0.324479	0.0390133	0.0904202	0.0861709	0.152621	ABC.ZM.A; zinc/manganese transport system ATP-binding protein
1136	K02075	2.97567	3.20439	2.20906	-0.973951	2.0598	-0.393072	0.320857	0.0387857	0.090062	0.0866847	0.153323	ABC.ZM.P; zinc/manganese transport system permease protein
1137	K02076	-1.09915	-0.447228	-1.32776	-0.211616	5.16187	-0.0416762	0.472	0.547081	0.655729	0.773548	0.840863	zurR, zur; Fur family transcriptional regulator, zinc uptake regulator
1138	K02077	3.86794	4.17285	3.19573	-1.03267	2.10195	-0.387128	0.304199	0.025844	0.0680747	0.0602423	0.1159	ABC.ZM.S; zinc/manganese transport system substrate-binding protein
1139	K02078	7.07902	7.35246	6.78129	-0.615465	0.814773	-0.734381	0.214571	0.00212426	0.0173543	0.00365683	0.0261898	acpP; acyl carrier protein
1140	K02079	-3.86962	-4.45026	-2.80249	1.8016	4.24892	0.367906	0.328763	0.117626	0.196806	0.106211	0.178793	agaA; N-acetylgalactosamine-6-phosphate deacetylase [EC:3.5.1.25]
1141	K02080	-0.865584	-0.525537	-1.35938	-0.660026	2.08054	-0.284851	0.383429	0.439868	0.558676	0.279418	0.387946	agaI; galactosamine-6-phosphate isomerase [EC:5.3.1.-]
1142	K02081	1.28538	1.41175	1.10783	-0.0828308	2.14702	-0.0375204	0.473579	0.88345	0.921692	0.803856	0.864568	agaR; DeoR family transcriptional regulator, aga operon transcriptional repressor
1143	K02082	1.76457	1.7958	1.76022	-0.0190438	1.368	-0.0117574	0.49443	0.945424	0.963915	0.958554	0.973219	agaS; tagatose-6-phosphate ketose/aldose isomerase [EC:5.-.-.-]
1144	K02083	0.590442	0.96701	0.385125	-0.570718	1.43015	-0.337225	0.373714	0.170349	0.266799	0.196645	0.294199	allC; allantoate deiminase [EC:3.5.3.9]
1145	K02086	1.79787	1.45372	2.09523	0.653722	1.79402	0.351774	0.327049	0.127596	0.213311	0.0978916	0.168481	dnaD; DNA replication protein
1146	K02099	1.94571	2.60568	1.73872	-0.873199	1.17945	-0.710119	0.180286	0.00377244	0.0194698	0.00139648	0.0213699	araC; AraC family transcriptional regulator, arabinose operon regulatory protein
1147	K02100	-1.7157	-2.13261	-1.12373	0.204508	3.70594	0.0539281	0.481005	0.751164	0.824246	0.883124	0.92188	araE; MFS transporter, SP family, arabinose:H+ symporter
1148	K02101	-10.2024	-10.0622	-10.2856	-0.0112272	4.54063	-0.00168405	0.499572	0.520591	0.606326	0.540898	0.623326	araL; arabinose operon protein AraL
1149	K02103	3.86249	4.12545	3.39736	-0.854768	0.897883	-0.871569	0.186286	0.00101754	0.0173525	0.00196999	0.0236374	araR; GntR family transcriptional regulator, arabinose operon transcriptional repressor
1150	K02106	-0.525962	-0.343778	-1.24726	-0.890508	1.3939	-0.509261	0.278777	0.0174545	0.0512216	0.0352714	0.0802926	atoE; short-chain fatty acids transporter
1151	K02107	1.05255	1.05341	1.05158	-0.244194	1.70293	-0.132003	0.442	0.191163	0.292161	0.640596	0.736819	ATPVG, ahaH, atpH; V/A-type H+/Na+-transporting ATPase subunit G/H
1152	K02108	6.4841	6.59988	6.25646	-0.607464	0.892093	-0.699355	0.234857	0.00420498	0.0205054	0.0104787	0.0386904	ATPF0A, atpB; F-type H+-transporting ATPase subunit a
1153	K02109	6.51728	6.66885	6.27834	-0.579353	0.882095	-0.66231	0.245714	0.00503139	0.0226601	0.0136021	0.0454627	ATPF0B, atpF; F-type H+-transporting ATPase subunit b
1154	K02110	6.48894	6.63428	6.25797	-0.604733	0.885418	-0.683166	0.234857	0.00363181	0.01907	0.00842712	0.0341313	ATPF0C, atpE; F-type H+-transporting ATPase subunit c
1155	K02111	6.47316	6.56925	6.24237	-0.552736	0.884043	-0.644773	0.239429	0.00477236	0.0219703	0.0102451	0.0382024	ATPF1A, atpA; F-type H+-transporting ATPase subunit alpha [EC:3.6.3.14]
1156	K02112	6.48344	6.63175	6.2563	-0.587716	0.880294	-0.688145	0.239931	0.00393349	0.0198155	0.010023	0.0377256	ATPF1B, atpD; F-type H+-transporting ATPase subunit beta [EC:3.6.3.14]
1157	K02113	6.24262	6.42796	6.03533	-0.589281	0.87014	-0.692265	0.225935	0.00283935	0.0174878	0.00745749	0.0319985	ATPF1D, atpH; F-type H+-transporting ATPase subunit delta
1158	K02114	6.48278	6.62869	6.25705	-0.609194	0.888061	-0.695303	0.239931	0.0038973	0.019724	0.00965817	0.0368742	ATPF1E, atpC; F-type H+-transporting ATPase subunit epsilon
1159	K02115	6.48302	6.63096	6.25591	-0.606174	0.875547	-0.691169	0.232286	0.00382222	0.0195325	0.00933285	0.0361515	ATPF1G, atpG; F-type H+-transporting ATPase subunit gamma
1160	K02116	2.55731	2.87965	2.29154	-0.474302	1.10824	-0.411953	0.338189	0.0947603	0.169716	0.106421	0.179934	atpI; ATP synthase protein I
1161	K02117	5.86482	5.99884	5.35272	-0.72272	0.885671	-0.772977	0.207941	0.00176471	0.0173533	0.00425148	0.0268882	ATPVA, ntpA, atpA; V/A-type H+/Na+-transporting ATPase subunit A [EC:3.6.3.14 3.6.3.15]
1162	K02118	5.89341	6.09443	5.47186	-0.736566	0.891974	-0.802281	0.201942	0.00131105	0.0173525	0.00400233	0.0265887	ATPVB, ntpB, atpB; V/A-type H+/Na+-transporting ATPase subunit B
1163	K02119	4.89583	5.20199	4.18024	-0.960751	0.907149	-0.942813	0.168	0.000664515	0.0173517	0.000811572	0.0188591	ATPVC, ntpC, atpC; V/A-type H+/Na+-transporting ATPase subunit C
1164	K02120	5.89413	6.10404	5.4714	-0.737226	0.895566	-0.808753	0.204799	0.00125042	0.0173525	0.0035099	0.0259997	ATPVD, ntpD, atpD; V/A-type H+/Na+-transporting ATPase subunit D
1165	K02121	4.54671	4.99339	4.20579	-0.777047	1.0316	-0.736089	0.194	0.00124894	0.0173525	0.00290401	0.0252531	ATPVE, ntpE, atpE; V/A-type H+/Na+-transporting ATPase subunit E
1166	K02122	5.18308	5.58671	4.74955	-0.852163	0.860544	-0.849116	0.183429	0.0031353	0.0179677	0.00137183	0.0214617	ATPVF, ntpF, atpF; V/A-type H+/Na+-transporting ATPase subunit F
1167	K02123	5.89802	6.10087	5.47163	-0.719995	0.88481	-0.791903	0.211429	0.00141336	0.0173529	0.00462949	0.0273023	ATPVI, ntpI, atpI; V/A-type H+/Na+-transporting ATPase subunit I
1168	K02124	5.89458	6.0978	5.47179	-0.738981	0.899021	-0.807458	0.210286	0.00129078	0.0173525	0.00384973	0.0264171	ATPVK, ntpK, atpK; V/A-type H+/Na+-transporting ATPase subunit K
1169	K02152	-10.4113	-10.0757	-10.6786	-0.492697	4.66301	-0.0886617	0.449871	0.486853	0.571888	0.492886	0.573066	ATPeV1G, ATP6G; V-type H+-transporting ATPase subunit G
1170	K02160	5.5646	5.83271	5.25026	-0.646832	0.752143	-0.74845	0.216571	0.00615635	0.0257371	0.00451424	0.0271493	accB, bccP; acetyl-CoA carboxylase biotin carboxyl carrier protein
1171	K02167	-4.01394	-4.70688	-2.92556	1.90712	4.34292	0.378177	0.327335	0.112351	0.189807	0.0914653	0.159028	betI; TetR/AcrR family transcriptional regulator, transcriptional repressor of bet genes
1172	K02168	-1.91003	-2.74493	-0.95978	2.08052	2.32493	0.885747	0.1511	0.000934469	0.0173769	0.000448026	0.0179578	betT, betS; choline/glycine/proline betaine transport protein
1173	K02169	3.84129	4.26155	3.59648	-0.543316	1.70551	-0.304334	0.324479	0.157427	0.251045	0.09406	0.163341	bioC; malonyl-CoA O-methyltransferase [EC:2.1.1.197]
1174	K02170	-3.30849	-4.55351	-2.51863	2.27723	4.14249	0.47696	0.276492	0.0599445	0.118245	0.0294964	0.0720318	bioH; pimeloyl-[acyl-carrier protein] methyl ester esterase [EC:3.1.1.85]
1175	K02171	4.1853	4.60681	3.67294	-1.02358	1.01389	-0.906776	0.176521	0.000686952	0.0173517	0.00116912	0.0204507	blaI; BlaI family transcriptional regulator, penicillinase repressor
1176	K02172	3.80647	3.9739	3.10941	-1.00765	1.05306	-0.920866	0.197143	0.000627386	0.0173517	0.00275804	0.0251058	blaR1; bla regulator protein blaR1
1177	K02173	1.19793	1.70591	1.09658	-0.571981	1.92063	-0.280053	0.375143	0.247972	0.358742	0.242891	0.348299	yggC; putative kinase
1178	K02182	-2.57096	-3.56367	-1.78502	1.57113	3.12289	0.430109	0.293143	0.154259	0.239034	0.0446122	0.0937993	caiC; carnitine-CoA ligase [EC:6.2.1.48]
1179	K02188	5.03889	5.43019	4.53818	-0.855911	0.884389	-0.949172	0.150528	0.000261357	0.0173517	0.000380538	0.0178067	cbiD; cobalt-precorrin-5B (C1)-methyltransferase [EC:2.1.1.195]
1180	K02189	4.77361	5.18828	4.44592	-0.773364	0.852219	-0.843295	0.182857	0.00148616	0.017353	0.00131324	0.0211762	cbiG; cobalt-precorrin 5A hydrolase [EC:3.7.1.12]
1181	K02190	4.99935	5.39787	4.66919	-0.815128	0.97066	-0.834175	0.195429	0.00126944	0.0173525	0.00263749	0.0248433	cbiK; sirohydrochlorin cobaltochelatase [EC:4.99.1.3]
1182	K02191	0.963916	0.734236	1.05916	-0.0147279	1.87981	-0.00613303	0.496286	0.580662	0.688185	0.932213	0.955556	cbiT; cobalt-precorrin-6B (C15)-methyltransferase [EC:2.1.1.196]
1183	K02192	-0.957929	-1.31531	-0.0516516	0.870659	2.38365	0.368847	0.362	0.127407	0.212765	0.204785	0.303825	bfd; bacterioferritin-associated ferredoxin
1184	K02193	0.33208	0.269445	0.383692	0.291893	0.947203	0.255636	0.380286	0.189284	0.289272	0.226463	0.327698	ccmA; heme exporter protein A [EC:3.6.3.41]
1185	K02194	0.330932	0.277267	0.383588	0.309536	0.934298	0.267772	0.367324	0.190027	0.290176	0.232164	0.334073	ccmB; heme exporter protein B
1186	K02195	0.331374	0.278239	0.383943	0.31263	0.947583	0.283215	0.367895	0.191634	0.29206	0.235526	0.337867	ccmC; heme exporter protein C
1187	K02196	-0.51953	-2.04501	0.191958	2.19871	2.55327	0.776556	0.182234	0.0030903	0.0188968	0.0015344	0.0216664	ccmD; heme exporter protein D
1188	K02197	0.330948	0.27828	0.387552	0.296678	0.953188	0.261172	0.376286	0.190563	0.290838	0.232418	0.334485	ccmE; cytochrome c-type biogenesis protein CcmE
1189	K02198	0.911188	0.867713	0.998993	0.17905	1.26006	0.120244	0.442731	0.542727	0.654253	0.60063	0.702562	ccmF; cytochrome c-type biogenesis protein CcmF
1190	K02199	0.329311	-0.400794	0.662748	1.00953	1.33785	0.690789	0.210511	0.00446639	0.0214974	0.00534426	0.0288631	ccmG, dsbE; cytochrome c biogenesis protein CcmG, thiol:disulfide interchange protein DsbE
1191	K02200	0.744817	0.47582	1.18301	0.610122	1.58089	0.375287	0.345044	0.0976088	0.173561	0.132052	0.213604	ccmH; cytochrome c-type biogenesis protein CcmH
1192	K02203	3.81104	4.32134	3.51336	-0.757782	0.889952	-0.804139	0.167714	0.00126238	0.0173527	0.000862626	0.0192189	thrH; phosphoserine / homoserine phosphotransferase [EC:3.1.3.3 2.7.1.39]
1193	K02204	-2.28422	-2.44473	-1.81065	-0.000937378	5.63371	-0.000204609	0.499714	0.325605	0.436815	0.949407	0.967176	thrB2; homoserine kinase type II [EC:2.7.1.39]
1194	K02205	-10.2042	-10.0759	-10.2954	-0.0221982	4.79837	-0.00466654	0.496857	0.517859	0.605124	0.536118	0.617693	rocE, rocC; arginine/ornithine permease
1195	K02217	5.02616	5.42442	4.88374	-0.637594	1.01926	-0.629575	0.249357	0.00525425	0.0232802	0.0152698	0.0492806	ftnA, ftn; ferritin [EC:1.16.3.2]
1196	K02221	3.49142	3.70891	3.25595	-0.486319	1.13463	-0.415615	0.304	0.0602665	0.122122	0.0617948	0.118136	yggT; YggT family protein
1197	K02224	5.54292	5.75431	5.19531	-0.60432	0.889647	-0.666761	0.236	0.00425351	0.0206317	0.0104354	0.0387392	cobB-cbiA; cobyrinic acid a,c-diamide synthase [EC:6.3.5.9 6.3.5.11]
1198	K02226	6.19505	6.35384	5.89363	-0.509712	0.961356	-0.515411	0.278286	0.0292429	0.0742393	0.0304826	0.073847	cobC, phpB; alpha-ribazole phosphatase [EC:3.1.3.73]
1199	K02227	5.69072	5.86472	5.22058	-0.610772	0.869399	-0.720305	0.222	0.00231062	0.0173547	0.00580674	0.0290396	cbiB, cobD; adenosylcobinamide-phosphate synthase [EC:6.3.1.10]
1200	K02230	1.7941	2.16284	1.24637	-1.15704	2.07166	-0.494072	0.296286	0.0403683	0.0924853	0.0473048	0.0975825	cobN; cobaltochelatase CobN [EC:6.6.1.2]
1201	K02231	5.95901	6.21869	5.54034	-0.598989	0.869563	-0.657303	0.243714	0.00643841	0.0265094	0.011296	0.0406345	cobP, cobU; adenosylcobinamide kinase / adenosylcobinamide-phosphate guanylyltransferase [EC:2.7.1.156 2.7.7.62]
1202	K02232	5.68233	5.85869	5.20045	-0.621032	0.883697	-0.708608	0.228571	0.00278059	0.0174664	0.00741001	0.0319935	cobQ, cbiP; adenosylcobyric acid synthase [EC:6.3.5.10]
1203	K02233	5.72369	5.90596	5.20885	-0.636778	0.849571	-0.736017	0.218286	0.00215808	0.0173544	0.00561059	0.0286388	E2.7.8.26, cobS, cobV; adenosylcobinamide-GDP ribazoletransferase [EC:2.7.8.26]
1204	K02236	-0.100031	-0.124962	-0.0929091	0.326322	3.02338	0.109816	0.447301	0.733764	0.811512	0.640159	0.736492	comC; leader peptidase (prepilin peptidase) / N-methyltransferase [EC:3.4.23.43 2.1.1.-]
1205	K02237	5.66853	5.87602	5.16725	-0.663334	0.805963	-0.781457	0.225935	0.00393478	0.0198225	0.0070865	0.0313192	comEA; competence protein ComEA
1206	K02238	6.35637	6.49409	6.24186	-0.558191	0.881893	-0.622647	0.248571	0.00979865	0.035053	0.0134658	0.0451646	comEC; competence protein ComEC
1207	K02239	-10.0546	-10.086	-10.0408	0.300301	4.72119	0.0527685	0.473579	0.515937	0.601683	0.544215	0.625501	comER; competence protein ComER
1208	K02240	1.90942	1.72723	2.16367	0.669007	1.714	0.356478	0.333905	0.107485	0.186945	0.114752	0.190998	comFA; competence protein ComFA
1209	K02241	-2.11236	-0.590884	-3.22654	-2.17147	4.18502	-0.495862	0.263714	0.0203934	0.0570358	0.0235057	0.0632325	comFB; competence protein ComFB
1210	K02242	1.71077	1.51733	2.07139	0.488848	1.85319	0.228345	0.396571	0.284441	0.399968	0.330643	0.442764	comFC; competence protein ComFC
1211	K02243	1.8621	1.57645	2.15619	0.742449	1.80105	0.411606	0.304	0.0856086	0.1574	0.0600712	0.115687	comGA; competence protein ComGA
1212	K02244	-0.357027	-0.592413	-0.136729	0.297309	3.17595	0.0857017	0.457298	0.906431	0.937231	0.670738	0.76117	comGB; competence protein ComGB
1213	K02245	1.32542	0.670027	1.84479	0.810014	2.42919	0.301945	0.386461	0.334668	0.453929	0.272	0.380509	comGC; competence protein ComGC
1214	K02246	-0.804898	-0.629953	-0.838965	0.0233952	3.26571	0.00468524	0.497286	0.895409	0.929419	0.950775	0.967986	comGD; competence protein ComGD
1215	K02247	-10.1909	-10.0035	-10.3038	-0.0611287	4.52416	-0.011995	0.493573	0.528867	0.61384	0.553139	0.633143	comGE; competence protein ComGE
1216	K02248	-1.38115	-1.51213	-1.28838	0.383102	3.60158	0.094872	0.450571	0.810175	0.866473	0.602628	0.703835	comGF; competence protein ComGF
1217	K02249	-10.202	-10.0605	-10.3148	-0.109523	4.52579	-0.0219902	0.489289	0.516428	0.601564	0.544235	0.625196	comGG; competence protein ComGG
1218	K02250	-2.84981	-3.39152	-2.47205	1.52279	5.30192	0.254594	0.379606	0.406415	0.519174	0.263391	0.370112	comK; competence protein ComK
1219	K02251	-10.2269	-10.0783	-10.3311	-0.0663433	4.58587	-0.0094005	0.495858	0.522919	0.608371	0.541238	0.62488	comQ; competence protein ComQ
1220	K02253	-10.2049	-10.0271	-10.3389	-0.0836181	4.6093	-0.0184639	0.492286	0.504043	0.590316	0.533263	0.613169	comX; competence protein ComX
1221	K02254	-10.2064	-10.0528	-10.3089	-0.0990829	4.71306	-0.0198599	0.486718	0.512262	0.597317	0.527639	0.609312	comZ; competence protein ComZ
1222	K02255	-3.48327	-4.59042	-2.53336	2.2558	4.14151	0.476898	0.275064	0.0653515	0.125801	0.03233	0.0761275	ftnB; ferritin-like protein 2
1223	K02259	-9.95631	-9.76526	-10.0889	-0.133044	4.98058	-0.0270739	0.486857	0.57578	0.657637	0.589676	0.666826	COX15, ctaA; cytochrome c oxidase assembly protein subunit 15
1224	K02274	-10.0047	-9.85829	-10.1192	-0.136063	5.07701	-0.023444	0.488146	0.573049	0.655466	0.585124	0.662878	coxA, ctaD; cytochrome c oxidase subunit I [EC:1.9.3.1]
1225	K02275	-9.92987	-9.72694	-10.0773	-0.240542	5.07805	-0.0414854	0.479143	0.575812	0.660418	0.578485	0.660566	coxB, ctaC; cytochrome c oxidase subunit II [EC:1.9.3.1]
1226	K02276	-10.0787	-9.74056	-10.289	-0.488001	4.96316	-0.0854016	0.454442	0.521116	0.605834	0.507714	0.58837	coxC, ctaE; cytochrome c oxidase subunit III [EC:1.9.3.1]
1227	K02277	-10.1931	-10.0252	-10.3046	-0.128589	4.52424	-0.0222039	0.489003	0.517291	0.599847	0.52183	0.602208	coxD, ctaF; cytochrome c oxidase subunit IV [EC:1.9.3.1]
1228	K02278	3.56916	3.74571	3.04321	-0.766343	0.955598	-0.732866	0.231143	0.00219002	0.0173626	0.00765768	0.0326793	cpaA, tadV; prepilin peptidase CpaA [EC:3.4.23.43]
1229	K02279	0.917614	1.78336	0.00534241	-1.77912	1.67699	-0.991466	0.114539	7.13e-05	0.0173517	9.22e-05	0.017775	cpaB, rcpC; pilus assembly protein CpaB
1230	K02280	-10.1268	-9.60642	-10.4964	-0.938233	5.2981	-0.167335	0.405313	0.396497	0.48166	0.40432	0.483529	cpaC, rcpA; pilus assembly protein CpaC
1231	K02282	-0.427682	0.562309	-2.23895	-2.98513	3.80315	-0.68702	0.154813	0.00219302	0.018191	0.000521097	0.017941	cpaE, tadZ; pilus assembly protein CpaE
1232	K02283	5.6197	5.71603	4.87293	-0.85608	0.932696	-0.884825	0.197429	0.000674763	0.0173517	0.00323902	0.0256618	cpaF, tadA; pilus assembly protein CpaF
1233	K02291	-5.39367	-5.32734	-5.46734	-0.963498	4.0864	-0.223492	0.397601	0.23734	0.332415	0.334217	0.440112	crtB; 15-cis-phytoene synthase [EC:2.5.1.32]
1234	K02297	-3.29489	-4.58753	-2.51225	2.23393	4.14823	0.464819	0.278857	0.0619536	0.121093	0.0299056	0.0726086	cyoA; cytochrome o ubiquinol oxidase subunit II [EC:1.10.3.10]
1235	K02298	-3.30706	-4.58651	-2.50681	2.25519	4.16299	0.47096	0.276492	0.0579686	0.115994	0.0304979	0.0734023	cyoB; cytochrome o ubiquinol oxidase subunit I [EC:1.10.3.10]
1236	K02299	-3.32199	-4.59711	-2.51355	2.24966	4.09487	0.478884	0.27992	0.0577968	0.11571	0.0299956	0.0726961	cyoC; cytochrome o ubiquinol oxidase subunit III
1237	K02300	-3.32955	-4.57965	-2.5148	2.28319	4.15473	0.482106	0.271922	0.0596363	0.118396	0.0297741	0.0722819	cyoD; cytochrome o ubiquinol oxidase subunit IV
1238	K02302	2.32079	2.60748	2.25014	-0.357228	1.39388	-0.25638	0.367324	0.136758	0.225082	0.211794	0.312595	cysG; uroporphyrin-III C-methyltransferase / precorrin-2 dehydrogenase / sirohydrochlorin ferrochelatase [EC:2.1.1.107 1.3.1.76 4.99.1.4]
1239	K02303	-8.12713	-9.46849	-6.23158	2.75946	5.91297	0.434025	0.324571	0.163512	0.239252	0.120375	0.188956	cobA; uroporphyrin-III C-methyltransferase [EC:2.1.1.107]
1240	K02304	4.73903	4.85495	4.30806	-0.746536	0.837963	-0.820053	0.208857	0.00101565	0.0173525	0.00349437	0.0260286	MET8; precorrin-2 dehydrogenase / sirohydrochlorin ferrochelatase [EC:1.3.1.76 4.99.1.4]
1241	K02313	6.25032	6.36417	5.87639	-0.609444	0.85345	-0.741442	0.213368	0.00252697	0.0173577	0.00482739	0.0274462	dnaA; chromosomal replication initiator protein
1242	K02314	6.35441	6.52498	6.03446	-0.650833	0.861247	-0.733758	0.223936	0.00262226	0.01737	0.00678381	0.0306429	dnaB; replicative DNA helicase [EC:3.6.4.12]
1243	K02315	6.50496	6.94431	6.33122	-0.718287	0.824475	-0.797796	0.195143	0.00321424	0.0180749	0.00224468	0.0242249	dnaC; DNA replication protein DnaC
1244	K02316	6.26419	6.39911	5.88125	-0.609696	0.835892	-0.736364	0.211368	0.00223135	0.0173544	0.0042933	0.0269434	dnaG; DNA primase [EC:2.7.7.-]
1245	K02317	-3.42915	-4.6055	-2.53377	2.24561	4.16711	0.484679	0.278	0.0624248	0.121652	0.0313062	0.0746221	dnaT; DNA replication protein DnaT
1246	K02318	-4.83513	-4.21831	-7.04842	-2.20886	5.47364	-0.390379	0.300857	0.114863	0.184285	0.06926	0.12753	COASY; phosphopantetheine adenylyltransferase / dephospho-CoA kinase [EC:2.7.7.3 2.7.1.24]
1247	K02334	4.19354	4.44276	3.79171	-0.612822	1.14928	-0.381223	0.309055	0.358837	0.479139	0.0726632	0.133603	dpo; DNA polymerase bacteriophage-type [EC:2.7.7.7]
1248	K02335	6.26936	6.38165	5.96729	-0.616203	0.844978	-0.716319	0.217714	0.00293696	0.0175952	0.00609551	0.0292778	polA; DNA polymerase I [EC:2.7.7.7]
1249	K02336	-3.31903	-4.5797	-2.51378	2.33031	4.14662	0.481299	0.273429	0.0596961	0.117671	0.0298369	0.0725415	polB; DNA polymerase II [EC:2.7.7.7]
1250	K02337	6.25875	6.40403	5.95478	-0.607431	0.84057	-0.725376	0.214	0.0025044	0.0173588	0.00418108	0.0268279	dnaE; DNA polymerase III subunit alpha [EC:2.7.7.7]
1251	K02338	6.25896	6.42038	5.87813	-0.650836	0.843154	-0.750026	0.206571	0.00154723	0.017353	0.00333122	0.0258865	dnaN; DNA polymerase III subunit beta [EC:2.7.7.7]
1252	K02339	0.189621	-0.428944	0.413025	0.806568	1.2987	0.595451	0.245358	0.0123678	0.0405424	0.0148959	0.0479534	holC; DNA polymerase III subunit chi [EC:2.7.7.7]
1253	K02340	6.24394	6.36026	5.87609	-0.596398	0.867725	-0.718818	0.223714	0.00288833	0.0175338	0.00675993	0.0305393	holA; DNA polymerase III subunit delta [EC:2.7.7.7]
1254	K02341	6.18898	6.29474	5.83793	-0.607698	0.863626	-0.698872	0.224	0.00298377	0.0176639	0.00758324	0.0322774	holB; DNA polymerase III subunit delta' [EC:2.7.7.7]
1255	K02342	5.82238	5.98137	5.50353	-0.599021	0.901935	-0.637308	0.241143	0.00296149	0.0176391	0.0104344	0.0387045	dnaQ; DNA polymerase III subunit epsilon [EC:2.7.7.7]
1256	K02343	6.24914	6.36274	5.87813	-0.603715	0.864997	-0.719993	0.212511	0.00257452	0.0173661	0.00529817	0.0279838	dnaX; DNA polymerase III subunit gamma/tau [EC:2.7.7.7]
1257	K02344	-2.20953	-2.99792	-0.762852	2.34611	2.50194	0.896199	0.156812	0.00107998	0.0174055	0.000539644	0.0181707	holD; DNA polymerase III subunit psi [EC:2.7.7.7]
1258	K02345	-2.99194	-4.57219	-2.30468	2.26085	4.13114	0.4782	0.274571	0.0577334	0.115534	0.0303388	0.0731648	holE; DNA polymerase III subunit theta [EC:2.7.7.7]
1259	K02346	6.15307	6.36472	5.8574	-0.596052	0.77878	-0.704159	0.203942	0.00378804	0.0194471	0.00375899	0.0262767	dinB; DNA polymerase IV [EC:2.7.7.7]
1260	K02347	-9.95337	-10.1158	-9.82419	0.638511	4.74818	0.118274	0.446444	0.487771	0.574901	0.505487	0.588976	polX, dpx; DNA polymerase (family X)
1261	K02348	1.25137	0.650474	1.39156	0.632137	1.56888	0.327004	0.332191	0.325739	0.443976	0.115303	0.191681	elaA; ElaA protein
1262	K02352	-9.70574	-9.61223	-9.77425	-0.0170298	4.97134	-0.00411803	0.498	0.573451	0.655437	0.584232	0.663143	drp35; lactonase [EC:3.1.1.-]
1263	K02355	7.02603	7.2295	6.77616	-0.632274	0.883614	-0.692368	0.21	0.00350725	0.0187629	0.00498446	0.0277127	fusA, GFM, EFG; elongation factor G
1264	K02356	6.29498	6.36994	5.96913	-0.569879	0.873707	-0.682743	0.232791	0.00571764	0.0245463	0.00872548	0.0347884	efp; elongation factor P
1265	K02357	6.24947	6.36029	5.87797	-0.621232	0.849741	-0.724843	0.214796	0.00256177	0.017363	0.0049626	0.0276047	tsf, TSFM; elongation factor Ts
1266	K02358	6.36286	6.49472	6.17337	-0.594304	0.823527	-0.731091	0.217714	0.00306487	0.0177852	0.00542625	0.0282593	tuf, TUFM; elongation factor Tu
1267	K02361	3.81858	3.83983	3.7921	-0.271074	1.17008	-0.206413	0.382748	0.0811449	0.151244	0.270253	0.378294	entC; isochorismate synthase [EC:5.4.4.2]
1268	K02362	-3.53421	-4.57217	-2.52671	2.13845	4.16979	0.454139	0.277714	0.077152	0.141435	0.038734	0.0853756	entD; enterobactin synthetase component D [EC:6.3.2.14 2.7.8.-]
1269	K02363	-2.97309	-4.04742	-2.50779	1.6947	3.45473	0.417724	0.291631	0.115902	0.192952	0.0456247	0.0952367	entE, dhbE, vibE, mxcE; 2,3-dihydroxybenzoate-AMP ligase [EC:6.3.2.14 2.7.7.58]
1270	K02364	-3.23169	-4.574	-2.5291	2.17578	3.5917	0.519627	0.262782	0.0549484	0.110412	0.023237	0.0623112	entF; enterobactin synthetase component F [EC:6.3.2.14]
1271	K02371	5.77391	6.01064	5.48873	-0.609757	0.88783	-0.649339	0.22565	0.0063629	0.0263054	0.00662469	0.0303802	fabK; enoyl-[acyl-carrier protein] reductase II [EC:1.3.1.9]
1272	K02372	5.88833	6.05827	5.40759	-0.673055	0.6845	-0.877622	0.167952	0.00216099	0.0173542	0.00109609	0.0202355	fabZ; 3-hydroxyacyl-[acyl-carrier-protein] dehydratase [EC:4.2.1.59]
1273	K02377	4.4942	4.89961	4.13963	-0.825649	1.13956	-0.685037	0.228286	0.00267556	0.0174512	0.00742799	0.032208	TSTA3, fcl; GDP-L-fucose synthase [EC:1.1.1.271]
1274	K02379	1.9602	2.21901	1.78823	-0.470963	0.853803	-0.527077	0.253927	0.0356535	0.0847592	0.0174976	0.0527352	fdhD; FdhD protein
1275	K02380	-0.859023	-1.34081	-0.661261	0.514752	1.39761	0.327848	0.36104	0.30147	0.416248	0.185612	0.27952	fdhE; FdhE protein
1276	K02381	-4.17659	-4.53851	-3.33004	1.43362	4.36935	0.290967	0.367714	0.196548	0.293227	0.211064	0.309448	fdrA; FdrA protein
1277	K02385	2.62985	3.03016	2.31083	-0.584926	1.76131	-0.315974	0.363039	0.152088	0.244365	0.196286	0.294567	flbD; flagellar protein FlbD
1278	K02386	-1.70715	-1.94787	-1.596	0.265769	2.8755	0.0773332	0.441143	0.547771	0.655589	0.560245	0.663433	flgA; flagella basal body P-ring formation protein FlgA
1279	K02387	3.69889	3.96931	3.36828	-0.552863	0.900674	-0.568445	0.249429	0.00974634	0.0348723	0.0148362	0.0480845	flgB; flagellar basal-body rod protein FlgB
1280	K02388	3.7659	4.0526	3.48244	-0.571793	0.944153	-0.571374	0.242502	0.0111889	0.038135	0.0107466	0.0394623	flgC; flagellar basal-body rod protein FlgC
1281	K02389	3.4373	3.67126	3.21062	-0.406939	0.926077	-0.430482	0.255641	0.0386546	0.0897528	0.0183404	0.0547914	flgD; flagellar basal-body rod modification protein FlgD
1282	K02390	3.69209	3.89783	3.44535	-0.526845	0.925421	-0.568683	0.243359	0.015413	0.0471966	0.0146296	0.047661	flgE; flagellar hook protein FlgE
1283	K02391	-3.7566	-4.83256	-1.99311	2.54453	4.42855	0.522223	0.278286	0.0462169	0.0982439	0.0346003	0.0791898	flgF; flagellar basal-body rod protein FlgF
1284	K02392	4.74949	5.04882	4.43163	-0.572907	1.01175	-0.582367	0.24	0.0116028	0.0390584	0.0102766	0.0384077	flgG; flagellar basal-body rod protein FlgG
1285	K02393	-1.71142	-1.96495	-1.58752	0.234187	2.91539	0.0694223	0.443016	0.540141	0.649486	0.555867	0.659085	flgH; flagellar L-ring protein precursor FlgH
1286	K02394	-1.70307	-1.96261	-1.60031	0.272494	2.83776	0.0830404	0.44	0.534431	0.644355	0.56429	0.666992	flgI; flagellar P-ring protein precursor FlgI
1287	K02395	2.35446	2.87143	1.88407	-1.08552	1.06582	-0.93974	0.157098	0.00062171	0.0173517	0.000454077	0.0178559	flgJ; flagellar protein FlgJ
1288	K02396	4.09443	4.26113	3.84549	-0.408119	0.907533	-0.441861	0.294857	0.0320654	0.0790084	0.0496514	0.100903	flgK; flagellar hook-associated protein 1 FlgK
1289	K02397	3.2641	3.43617	3.09341	-0.337314	0.954459	-0.324295	0.323907	0.0903985	0.163809	0.0842336	0.149557	flgL; flagellar hook-associated protein 3 FlgL
1290	K02398	3.09287	3.48088	2.90004	-0.510843	0.963999	-0.464311	0.278206	0.0370951	0.0872446	0.0307049	0.0741476	flgM; negative regulator of flagellin synthesis FlgM
1291	K02399	-3.75688	-4.86098	-1.98903	2.60758	4.51873	0.519923	0.27535	0.0508766	0.104289	0.0334451	0.0776186	flgN; flagella synthesis protein FlgN
1292	K02400	3.79477	4.0553	3.51228	-0.540377	0.878486	-0.580516	0.235647	0.0100738	0.0356372	0.0102548	0.0383373	flhA; flagellar biosynthesis protein FlhA
1293	K02401	3.62182	3.90517	3.20874	-0.691413	0.983063	-0.656236	0.242571	0.00517978	0.0230946	0.0139616	0.0462979	flhB; flagellar biosynthetic protein FlhB
1294	K02402	-3.77319	-4.84089	-2.53443	2.37035	4.3807	0.477323	0.289632	0.0637547	0.124052	0.0480107	0.0985461	flhC; flagellar transcriptional activator FlhC
1295	K02403	-3.74987	-4.84761	-2.5433	2.34265	4.30521	0.472936	0.29363	0.0682478	0.129969	0.0489957	0.0999487	flhD; flagellar transcriptional activator FlhD
1296	K02404	2.68217	2.8295	2.60061	-0.44567	1.21891	-0.334591	0.345901	0.131646	0.218527	0.153392	0.24122	flhF; flagellar biosynthesis protein FlhF
1297	K02405	3.76652	4.04994	3.45131	-0.573269	0.937992	-0.593541	0.238571	0.0109826	0.037676	0.0106079	0.0391711	fliA; RNA polymerase sigma factor for flagellar operon FliA
1298	K02406	5.12736	5.32078	4.80878	-0.462156	1.05269	-0.420985	0.296772	0.0551636	0.114801	0.0477378	0.0982273	fliC; flagellin
1299	K02407	3.9431	3.99468	3.78162	-0.370848	0.968992	-0.345301	0.31391	0.079807	0.149396	0.0719724	0.132563	fliD; flagellar hook-associated protein 2
1300	K02408	3.74741	4.02704	3.47103	-0.551802	0.921478	-0.5839	0.24136	0.0126822	0.0414253	0.0124562	0.0431838	fliE; flagellar hook-basal body complex protein FliE
1301	K02409	3.36415	3.58731	3.16364	-0.405981	0.93381	-0.386595	0.297915	0.0575617	0.118205	0.0508808	0.102675	fliF; flagellar M-ring protein FliF
1302	K02410	3.76439	4.05417	3.48269	-0.560716	0.942942	-0.566606	0.243073	0.0112816	0.0383515	0.0107391	0.0394276	fliG; flagellar motor switch protein FliG
1303	K02411	3.15714	3.20877	2.85297	-0.294862	0.963865	-0.275122	0.380748	0.165054	0.260394	0.267798	0.375687	fliH; flagellar assembly protein FliH
1304	K02412	3.76742	4.0512	3.48109	-0.564139	0.936591	-0.579417	0.241074	0.0112555	0.0382915	0.0107386	0.0394392	fliI; flagellum-specific ATP synthase [EC:3.6.3.14]
1305	K02413	3.17937	3.35025	3.10097	-0.266281	0.998239	-0.256159	0.357429	0.12763	0.213376	0.166257	0.257425	fliJ; flagellar FliJ protein
1306	K02414	1.8536	2.01742	1.71642	-0.581716	1.48625	-0.376445	0.318	0.031471	0.0779657	0.0741255	0.135533	fliK; flagellar hook-length control protein FliK
1307	K02415	-0.0563007	0.0269707	-0.161832	-0.494376	2.75934	-0.117593	0.42645	0.74047	0.814973	0.525044	0.635774	fliL; flagellar FliL protein
1308	K02416	3.76711	4.04405	3.4731	-0.577013	0.958914	-0.572799	0.23936	0.0116747	0.0392195	0.011096	0.0402378	fliM; flagellar motor switch protein FliM
1309	K02417	3.99677	4.40432	3.92459	-0.527616	1.02386	-0.513305	0.266857	0.0284759	0.0728212	0.0255583	0.0666196	fliNY, fliN; flagellar motor switch protein FliN/FliY
1310	K02418	3.06037	3.31027	2.92029	-0.321166	0.969149	-0.298888	0.33162	0.0967616	0.172462	0.0860115	0.152006	fliOZ, fliO; flagellar protein FliO/FliZ
1311	K02419	3.76857	4.05028	3.48041	-0.584101	0.929846	-0.596561	0.236571	0.0108411	0.0373548	0.0104207	0.038732	fliP; flagellar biosynthetic protein FliP
1312	K02420	3.76232	4.04334	3.48129	-0.551999	0.948322	-0.569498	0.243359	0.011827	0.0395441	0.0117709	0.0417354	fliQ; flagellar biosynthetic protein FliQ
1313	K02421	3.62618	3.90699	3.22058	-0.74737	1.01985	-0.692609	0.237143	0.00401774	0.0200374	0.0108998	0.0397536	fliR; flagellar biosynthetic protein FliR
1314	K02422	4.3074	4.65438	3.9145	-0.507303	0.883269	-0.551941	0.243429	0.0155224	0.0474354	0.0131737	0.0446108	fliS; flagellar protein FliS
1315	K02423	-3.74985	-4.859	-2.4028	2.41756	4.22966	0.488109	0.279063	0.0610927	0.119891	0.0396203	0.0865098	fliT; flagellar protein FliT
1316	K02424	0.484668	0.677716	0.429679	0.245533	1.72361	0.138295	0.439714	0.451457	0.570316	0.557581	0.664159	fliY; cystine transport system substrate-binding protein
1317	K02425	-3.7735	-4.83245	-2.52004	2.36021	4.34411	0.478477	0.3002	0.0623535	0.122419	0.0492032	0.100283	fliZ; regulator of sigma S factor FliZ
1318	K02426	4.10443	4.39463	3.92062	-0.539031	1.05679	-0.470055	0.286571	0.0160369	0.0485071	0.0403667	0.0878735	sufE; cysteine desulfuration protein SufE
1319	K02427	0.248812	0.0750482	0.426195	0.481258	1.03019	0.396161	0.307912	0.0800641	0.149473	0.0724692	0.132973	rlmE, rrmJ, ftsJ; 23S rRNA (uridine2552-2'-O)-methyltransferase [EC:2.1.1.166]
1320	K02428	6.57942	6.78168	6.19421	-0.669377	0.843046	-0.735558	0.214286	0.00178242	0.0173535	0.00565729	0.0287134	rdgB; XTP/dITP diphosphohydrolase [EC:3.6.1.66]
1321	K02429	5.65644	5.99419	5.55019	-0.541577	1.29605	-0.383934	0.31848	0.0384462	0.0894894	0.079598	0.143361	fucP; MFS transporter, FHS family, L-fucose permease
1322	K02430	-1.87423	-2.68046	-0.499579	2.38485	2.23992	1.01597	0.123429	0.000533721	0.0173844	0.000119484	0.0177755	fucR; DeoR family transcriptional regulator, L-fucose operon activator
1323	K02431	2.91968	3.38873	2.64816	-0.621931	0.914773	-0.710229	0.209143	0.00508602	0.0228381	0.00407487	0.0266438	fucU, FUOM; L-fucose mutarotase [EC:5.1.3.29]
1324	K02433	5.43345	5.7737	4.69203	-0.855346	0.895406	-0.898283	0.20994	0.000727118	0.0173517	0.00396258	0.0265365	gatA, QRSL1; aspartyl-tRNA(Asn)/glutamyl-tRNA(Gln) amidotransferase subunit A [EC:6.3.5.6 6.3.5.7]
1325	K02434	5.42705	5.76546	4.6779	-0.850856	0.898051	-0.881877	0.216	0.000739423	0.0173517	0.0041047	0.0266904	gatB, PET112; aspartyl-tRNA(Asn)/glutamyl-tRNA(Gln) amidotransferase subunit B [EC:6.3.5.6 6.3.5.7]
1326	K02435	5.42013	5.76356	4.65398	-0.863898	0.902809	-0.899395	0.209143	0.000701832	0.0173517	0.00403484	0.0266006	gatC, GATC; aspartyl-tRNA(Asn)/glutamyl-tRNA(Gln) amidotransferase subunit C [EC:6.3.5.6 6.3.5.7]
1327	K02436	-3.9908	-4.69259	-3.33855	1.64764	3.86144	0.376983	0.319909	0.139606	0.223226	0.0939126	0.161928	gatR; DeoR family transcriptional regulator, galactitol utilization operon repressor
1328	K02437	4.61104	4.92476	4.45353	-0.640727	0.964648	-0.704742	0.204227	0.00180793	0.0173535	0.00345084	0.0259588	gcvH, GCSH; glycine cleavage system H protein
1329	K02438	5.61553	5.87963	5.06654	-0.806084	0.928926	-0.826267	0.210226	0.000780888	0.0173517	0.0036696	0.0261803	glgX; glycogen debranching enzyme [EC:3.2.1.196]
1330	K02439	0.663914	0.749865	0.334381	-0.0803257	2.53274	-0.0315004	0.48	0.653309	0.748514	0.865118	0.909681	glpE; thiosulfate sulfurtransferase [EC:2.8.1.1]
1331	K02440	4.14007	4.38576	3.74134	-0.566243	0.980959	-0.533289	0.280286	0.0304524	0.0762901	0.0355082	0.0810021	GLPF; glycerol uptake facilitator protein
1332	K02441	-1.54504	-2.47055	-1.41483	0.991914	2.29623	0.330819	0.342286	0.0923012	0.166028	0.121697	0.200004	glpG; GlpG protein
1333	K02443	1.75016	2.07344	1.42886	-0.565881	0.930664	-0.510249	0.286286	0.0664377	0.130652	0.0455099	0.0951121	glpP; glycerol uptake operon antiterminator
1334	K02444	3.76083	3.94915	3.20935	-0.60788	1.03166	-0.566341	0.308198	0.0332023	0.0809418	0.0604612	0.116253	glpR; DeoR family transcriptional regulator, glycerol-3-phosphate regulon repressor
1335	K02445	1.75283	1.86203	1.74422	-0.123059	0.995816	-0.0995793	0.447301	0.66962	0.761281	0.647707	0.741164	glpT; MFS transporter, OPA family, glycerol-3-phosphate transporter
1336	K02446	1.29531	1.28532	1.31847	-0.00810991	0.918971	-0.00845048	0.495858	0.835687	0.886927	0.940358	0.96097	glpX; fructose-1,6-bisphosphatase II [EC:3.1.3.11]
1337	K02450	-4.55587	-4.9147	-3.53526	1.59963	4.41511	0.308864	0.367429	0.187841	0.282235	0.22394	0.32293	gspA; general secretion pathway protein A
1338	K02451	-9.65042	-9.5523	-9.72612	-0.0121623	5.0004	-0.00281646	0.498	0.546261	0.634446	0.580467	0.661158	gspB; general secretion pathway protein B
1339	K02452	-3.3583	-3.64862	-2.52344	1.59259	4.51784	0.293761	0.358755	0.16818	0.259968	0.187332	0.282084	gspC; general secretion pathway protein C
1340	K02453	-1.22332	-1.87552	-1.14435	0.666514	2.94043	0.22149	0.418738	0.39403	0.513175	0.461336	0.574769	gspD; general secretion pathway protein D
1341	K02454	-0.940239	-0.97548	-0.901927	-0.106974	2.20936	-0.0478571	0.478286	0.636808	0.734371	0.842098	0.891535	gspE; general secretion pathway protein E
1342	K02455	-3.16839	-3.38731	-2.49832	0.859747	4.64374	0.155973	0.417595	0.315175	0.42745	0.459163	0.571654	gspF; general secretion pathway protein F
1343	K02456	0.695508	0.930527	0.321457	-0.510289	2.11689	-0.225256	0.402286	0.220097	0.326529	0.365424	0.478739	gspG; general secretion pathway protein G
1344	K02457	-3.35201	-3.63172	-2.49331	1.58935	4.56364	0.289033	0.362571	0.161865	0.252786	0.189618	0.284797	gspH; general secretion pathway protein H
1345	K02458	-3.34993	-3.6181	-2.50122	1.63315	4.54214	0.302705	0.363039	0.158104	0.248547	0.190083	0.285175	gspI; general secretion pathway protein I
1346	K02459	-3.35332	-3.64019	-2.5027	1.63351	4.57811	0.293267	0.362286	0.164999	0.256426	0.19023	0.285511	gspJ; general secretion pathway protein J
1347	K02460	-3.35016	-3.6325	-2.50742	1.65999	4.49969	0.303967	0.362286	0.161576	0.252184	0.190666	0.285971	gspK; general secretion pathway protein K
1348	K02461	-3.35306	-3.61593	-2.51374	1.56295	4.53446	0.283705	0.364857	0.168477	0.260696	0.193987	0.289879	gspL; general secretion pathway protein L
1349	K02462	-4.15451	-4.59775	-3.19741	1.52526	4.29762	0.298753	0.357612	0.162868	0.253358	0.172996	0.263784	gspM; general secretion pathway protein M
1350	K02463	-10.3256	-10.1287	-10.4645	-0.207504	4.40858	-0.0395496	0.478571	0.49911	0.584783	0.508399	0.590342	gspN; general secretion pathway protein N
1351	K02464	-4.22384	-4.68192	-3.22789	1.55659	4.25939	0.312929	0.353613	0.161094	0.250591	0.165618	0.254848	gspO; general secretion pathway protein O [EC:3.4.23.43 2.1.1.-]
1352	K02465	-10.3144	-10.0545	-10.5028	-0.406114	4.49853	-0.0829991	0.45844	0.525333	0.608623	0.516399	0.598433	gspS; general secretion pathway protein S
1353	K02466	-3.64283	-4.53867	-2.65316	1.92547	4.24843	0.399933	0.316286	0.104942	0.180336	0.0820553	0.146202	gutM; glucitol operon activator protein
1354	K02467	-3.47738	-4.59781	-2.54068	2.22775	4.14268	0.47394	0.274779	0.0640561	0.124399	0.0325882	0.0765191	gutQ; arabinose 5-phosphate isomerase [EC:5.3.1.13]
1355	K02468	-3.5073	-4.56007	-2.48508	1.93959	4.20026	0.39678	0.316	0.0983511	0.171321	0.0767059	0.138783	srlR, gutR; DeoR family transcriptional regulator, glucitol operon repressor
1356	K02469	6.98763	7.19962	6.6346	-0.674124	0.844023	-0.822166	0.184286	0.000935877	0.0173525	0.0013392	0.0213328	gyrA; DNA gyrase subunit A [EC:5.99.1.3]
1357	K02470	6.94755	7.14183	6.50843	-0.676056	0.836649	-0.801103	0.185376	0.0012548	0.0173525	0.00189374	0.0233766	gyrB; DNA gyrase subunit B [EC:5.99.1.3]
1358	K02471	0.895932	0.861145	0.930821	-0.0330186	1.39658	-0.01923	0.490857	0.812428	0.870687	0.930228	0.953992	bacA; vitamin B12/bleomycin/antimicrobial peptide transport system ATP-binding/permease protein
1359	K02472	1.55269	2.47505	0.829342	-1.52315	2.32022	-0.573732	0.265429	0.0127096	0.0415153	0.0206922	0.0587902	wecC; UDP-N-acetyl-D-mannosaminuronic acid dehydrogenase [EC:1.1.1.336]
1360	K02473	-0.726661	0.656734	-2.07101	-2.58642	4.36258	-0.467308	0.223714	0.0158642	0.0479615	0.00965241	0.0370436	wbpP; UDP-N-acetylglucosamine 4-epimerase [EC:5.1.3.7]
1361	K02474	2.79256	3.34529	2.59853	-1.41808	2.29716	-0.515645	0.252857	0.022105	0.0606608	0.0190363	0.0563345	wbpO; UDP-N-acetyl-D-galactosamine dehydrogenase [EC:1.1.1.-]
1362	K02475	-1.99484	-2.51715	-1.8324	0.542785	3.28197	0.160109	0.443143	0.480861	0.597061	0.610273	0.709777	K02475; two-component system, CitB family, response regulator
1363	K02476	-1.63136	-1.9646	-1.26908	0.475864	3.08399	0.152214	0.459583	0.551929	0.661889	0.706865	0.790085	K02476; two-component system, CitB family, sensor kinase [EC:2.7.13.3]
1364	K02477	4.93837	5.29352	4.83608	-0.306335	1.08828	-0.242449	0.401885	0.141018	0.230492	0.367962	0.481675	K02477; two-component system, LytTR family, response regulator
1365	K02478	0.102491	-0.0176877	0.352475	0.382806	1.83114	0.156515	0.421594	0.835027	0.886645	0.467461	0.580534	K02478; two-component system, LytTR family, sensor kinase [EC:2.7.13.3]
1366	K02479	-10.1716	-10.0526	-10.2613	0.065759	4.5452	0.01124	0.493859	0.510794	0.596766	0.526692	0.609559	K02479; two-component system, NarL family, response regulator
1367	K02480	-10.2241	-10.1519	-10.2818	0.0347841	4.6483	0.00513432	0.496715	0.512439	0.598839	0.518429	0.600147	K02480; two-component system, NarL family, sensor kinase [EC:2.7.13.3]
1368	K02481	4.47867	5.01859	4.15491	-0.660402	1.65447	-0.445232	0.271143	0.0418264	0.0948296	0.0268302	0.0686552	K02481; two-component system, NtrC family, response regulator
1369	K02482	-10.1466	-9.80789	-10.3905	-0.593687	5.31334	-0.0971907	0.444571	0.509481	0.595907	0.499498	0.580705	K02482; two-component system, NtrC family, sensor kinase [EC:2.7.13.3]
1370	K02483	3.03659	3.42647	2.18675	-1.13058	1.80665	-0.543754	0.291917	0.0107573	0.037203	0.0465976	0.0965496	K02483; two-component system, OmpR family, response regulator
1371	K02484	4.41002	4.6349	4.22597	-0.557917	1.21598	-0.435812	0.315714	0.0472167	0.10311	0.0745638	0.136307	K02484; two-component system, OmpR family, sensor kinase [EC:2.7.13.3]
1372	K02485	-3.31887	-4.57081	-2.52615	2.26952	4.21475	0.487294	0.268286	0.0597187	0.117945	0.0306088	0.0735615	rssB, hnr; two-component system, response regulator
1373	K02486	-7.80451	-8.10187	-7.38079	0.898145	7.01419	0.128214	0.442857	0.588766	0.676834	0.605853	0.690882	K02486; two-component system, sensor kinase [EC:2.7.13.3]
1374	K02487	-9.65486	-9.58175	-9.72482	0.00429943	4.98089	0.000431149	0.499572	0.549042	0.633354	0.565826	0.646777	pilL; type IV pili sensor histidine kinase and response regulator
1375	K02488	-7.8211	-8.16378	-7.32532	0.9195	6.99712	0.124902	0.438732	0.559553	0.64923	0.577894	0.663566	pleD; two-component system, cell cycle response regulator [EC:2.7.7.65]
1376	K02490	-9.10559	-9.42862	-8.69566	1.06603	5.70149	0.179503	0.422451	0.469061	0.558144	0.490366	0.575181	spo0F; two-component system, response regulator, stage 0 sporulation protein F
1377	K02491	-10.1908	-10.0382	-10.3305	-0.000543084	4.59885	-0.000160183	0.499857	0.528855	0.613086	0.541559	0.621386	kinA; two-component system, sporulation sensor kinase A [EC:2.7.13.3]
1378	K02492	4.02798	4.36424	3.72124	-0.645053	0.818561	-0.770741	0.212796	0.00403247	0.0200778	0.00582422	0.0291713	hemA; glutamyl-tRNA reductase [EC:1.2.1.70]
1379	K02493	6.24372	6.35376	5.83197	-0.619292	0.854795	-0.746833	0.216795	0.00225532	0.0173544	0.00530445	0.0280753	hemK, prmC, HEMK; release factor glutamine methyltransferase [EC:2.1.1.297]
1380	K02494	-1.86784	-2.72411	-0.765499	1.96256	2.7581	0.663007	0.225143	0.00992784	0.0349808	0.00728015	0.0324295	lolB; outer membrane lipoprotein LolB
1381	K02495	6.90739	7.13381	6.72469	-0.66279	0.851575	-0.724673	0.209143	0.00382992	0.0195522	0.00470763	0.027371	hemN, hemZ; oxygen-independent coproporphyrinogen III oxidase [EC:1.3.98.3]
1382	K02496	-0.648899	-0.826588	-0.414311	0.521595	1.53147	0.301372	0.372571	0.105681	0.184243	0.226842	0.328341	hemX; uroporphyrin-III C-methyltransferase [EC:2.1.1.107]
1383	K02497	-10.0812	-10.0826	-10.0807	0.269395	4.80425	0.0469201	0.475143	0.510679	0.597057	0.553294	0.631383	hemX; HemX protein
1384	K02498	-2.21895	-3.00475	-0.768969	2.33003	2.47024	0.889122	0.157098	0.00107652	0.0174427	0.000546035	0.0181602	hemY; HemY protein
1385	K02499	4.74016	5.15482	4.60591	-0.782117	1.01493	-0.727809	0.20994	0.00672926	0.0272905	0.00415129	0.0267081	yabN; tetrapyrrole methylase family protein / MazG family protein
1386	K02500	6.29153	6.44182	6.03446	-0.635416	0.896121	-0.686241	0.213082	0.00409105	0.0202172	0.00566734	0.0287252	hisF; cyclase [EC:4.1.3.-]
1387	K02501	6.29127	6.44322	6.03388	-0.622504	0.896253	-0.685666	0.215143	0.00394807	0.0198484	0.00511841	0.0279258	hisH; glutamine amidotransferase [EC:2.4.2.-]
1388	K02502	5.77518	6.05136	5.43763	-0.622851	0.927011	-0.637901	0.234857	0.0214029	0.0593332	0.0109652	0.0398677	hisZ; ATP phosphoribosyltransferase regulatory subunit
1389	K02503	6.24876	6.35956	5.87797	-0.622266	0.860034	-0.723377	0.214225	0.00255283	0.0173614	0.00494421	0.0275795	HINT1, hinT, hit; histidine triad (HIT) family protein
1390	K02504	-2.20832	-2.98612	-0.769225	2.35431	2.49848	0.888362	0.156857	0.00106973	0.0174511	0.000532633	0.0181523	hofB; protein transport protein HofB
1391	K02505	-2.22191	-2.97899	-0.767806	2.37086	2.51343	0.892934	0.159714	0.00113777	0.0174362	0.000564843	0.0182221	hofC; protein transport protein HofC
1392	K02506	-3.58015	-7.13335	-2.71968	3.75932	5.51352	0.640567	0.218	0.0162423	0.0455268	0.00672219	0.0316667	hofD, hopD; leader peptidase HopD [EC:3.4.23.43]
1393	K02507	0.377865	0.497138	0.260128	0.0977225	1.34136	0.0702906	0.467429	0.653089	0.747157	0.790944	0.854247	hofQ; protein transport protein HofQ
1394	K02508	-8.61051	-8.972	-8.24504	1.13687	5.33588	0.182689	0.420166	0.456383	0.546086	0.469317	0.555326	hpaA; AraC family transcriptional regulator, 4-hydroxyphenylacetate 3-monooxygenase operon regulatory protein
1395	K02509	-4.78277	-5.17387	-4.10111	0.996439	5.86209	0.153906	0.432571	0.600036	0.690965	0.538215	0.642602	hpaH; 2-oxo-hept-3-ene-1,7-dioate hydratase [EC:4.2.1.-]
1396	K02510	0.628196	0.779904	0.304941	-0.405931	1.19083	-0.322911	0.341045	0.199279	0.301503	0.14222	0.226492	hpaI, hpcH; 4-hydroxy-2-oxoheptanedioate aldolase [EC:4.1.2.52]
1397	K02511	-8.61511	-8.97852	-8.26582	1.07402	5.29593	0.180584	0.425143	0.454365	0.544741	0.480406	0.567434	hpaX; MFS transporter, ACS family, 4-hydroxyphenylacetate permease
1398	K02517	4.4668	4.66205	4.25293	-0.559718	1.08693	-0.513911	0.265067	0.00961457	0.0346215	0.020968	0.0594242	lpxL, htrB; Kdo2-lipid IVA lauroyltransferase [EC:2.3.1.241]
1399	K02518	6.22596	6.35785	5.87677	-0.655806	0.869665	-0.74102	0.191374	0.00203748	0.0173541	0.00259174	0.0248988	infA; translation initiation factor IF-1
1400	K02519	6.25349	6.3681	5.87844	-0.613475	0.864773	-0.710882	0.229429	0.00288829	0.0175339	0.00642696	0.0298731	infB, MTIF2; translation initiation factor IF-2
1401	K02520	6.24896	6.36241	5.87856	-0.602458	0.865239	-0.713702	0.217429	0.00261801	0.017371	0.00531368	0.0280001	infC, MTIF3; translation initiation factor IF-3
1402	K02521	-2.22441	-3.00109	-0.770398	2.36069	2.51343	0.87899	0.161954	0.0010925	0.0174369	0.000575426	0.01831	ilvY; LysR family transcriptional regulator, positive regulator for ilvC
1403	K02523	4.18714	4.48353	4.00724	-0.456857	1.12229	-0.386556	0.299429	0.0285474	0.0729806	0.0648082	0.122367	ispB; octaprenyl-diphosphate synthase [EC:2.5.1.90]
1404	K02525	-4.3634	-5.14554	-3.14681	1.86344	6.18647	0.263173	0.377321	0.298341	0.402656	0.252458	0.35586	kdgR; LacI family transcriptional regulator, kdg operon repressor
1405	K02526	0.225953	0.911944	-0.279084	-0.929184	1.64589	-0.527032	0.280286	0.0341655	0.0822511	0.0306877	0.0741015	kdgT; 2-keto-3-deoxygluconate permease
1406	K02527	4.31852	4.50994	4.06645	-0.545337	1.02142	-0.435277	0.294857	0.0155303	0.0474756	0.049559	0.100806	kdtA, waaA; 3-deoxy-D-manno-octulosonic-acid transferase [EC:2.4.99.12 2.4.99.13 2.4.99.14 2.4.99.15]
1407	K02528	6.24966	6.36001	5.87695	-0.611438	0.850387	-0.730412	0.218857	0.00262718	0.0173752	0.00540595	0.0281188	ksgA; 16S rRNA (adenine1518-N6/adenine1519-N6)-dimethyltransferase [EC:2.1.1.182]
1408	K02529	8.38989	8.59787	7.95814	-0.670109	0.839792	-0.824843	0.204513	0.000871492	0.0173525	0.00368767	0.0262123	lacI, galR; LacI family transcriptional regulator
1409	K02530	-1.89282	-3.09659	-1.53108	1.66349	4.06051	0.366641	0.349614	0.293177	0.402887	0.152464	0.239799	lacR; DeoR family transcriptional regulator, lactose phosphotransferase system repressor
1410	K02531	-3.74455	-3.71472	-3.82091	0.043113	4.17592	0.00897797	0.495573	0.779272	0.841235	0.891107	0.926287	lacT; transcriptional antiterminator
1411	K02532	3.30278	3.58744	3.06237	-0.755183	1.46298	-0.478308	0.302857	0.0323178	0.0795125	0.0577238	0.112341	lacY; MFS transporter, OHS family, lactose permease
1412	K02533	0.0346775	0.0751194	0.000461556	-0.0298197	1.50202	-0.0158791	0.491574	0.701337	0.785944	0.901567	0.934138	lasT; tRNA/rRNA methyltransferase [EC:2.1.1.-]
1413	K02535	1.07832	1.00131	1.15858	-0.0104054	1.3181	-0.00765568	0.495143	0.673527	0.764748	0.939347	0.960257	lpxC; UDP-3-O-[3-hydroxymyristoyl] N-acetylglucosamine deacetylase [EC:3.5.1.108]
1414	K02536	4.35973	4.60233	4.10127	-0.527475	1.03338	-0.460988	0.278206	0.0123683	0.0407661	0.0317268	0.075647	lpxD; UDP-3-O-[3-hydroxymyristoyl] glucosamine N-acyltransferase [EC:2.3.1.191]
1415	K02538	-3.95353	-4.90635	-2.87779	2.05973	4.50923	0.408763	0.307714	0.130205	0.211179	0.0614743	0.117565	manR; activator of the mannose operon, transcriptional antiterminator
1416	K02548	4.63831	5.04466	4.47676	-0.585201	0.961582	-0.57181	0.241645	0.0075206	0.0293991	0.0114622	0.0410473	menA; 1,4-dihydroxy-2-naphthoate octaprenyltransferase [EC:2.5.1.74 2.5.1.-]
1417	K02549	-0.391512	-0.513409	-0.118344	0.647322	1.91309	0.323696	0.351614	0.169643	0.265598	0.163039	0.252838	menC; O-succinylbenzoate synthase [EC:4.2.1.113]
1418	K02550	-4.56781	-4.89743	-3.49839	1.46894	4.71094	0.26163	0.377714	0.319963	0.427535	0.272141	0.376996	glcA; glycolate permease
1419	K02551	4.39653	4.51776	4.2223	-0.663052	1.03411	-0.597206	0.27335	0.0045405	0.0213718	0.0310459	0.0746019	menD; 2-succinyl-5-enolpyruvyl-6-hydroxy-3-cyclohexene-1-carboxylate synthase [EC:2.2.1.9]
1420	K02552	-0.41784	-0.521945	-0.131695	0.606682	1.87639	0.314528	0.355143	0.19073	0.291341	0.168315	0.259538	menF; menaquinone-specific isochorismate synthase [EC:5.4.4.2]
1421	K02553	-2.21907	-2.98377	-0.766369	2.33208	2.48501	0.915006	0.159954	0.0010859	0.017478	0.000535404	0.0181653	rraA, menG; regulator of ribonuclease activity A
1422	K02554	-4.3538	-4.15884	-4.83491	-0.934801	4.56661	-0.179835	0.399429	0.270823	0.367975	0.346713	0.45598	mhpD; 2-keto-4-pentenoate hydratase [EC:4.2.1.80]
1423	K02556	3.92921	4.33649	3.87741	-0.554817	0.992	-0.566117	0.257355	0.0140832	0.044446	0.0186396	0.0550921	motA; chemotaxis protein MotA
1424	K02557	4.3239	4.75889	4.05128	-0.689458	0.992758	-0.666253	0.23479	0.00533588	0.0235092	0.00898738	0.0355221	motB; chemotaxis protein MotB
1425	K02558	0.937679	1.11269	0.6368	-0.428577	0.901098	-0.384764	0.304286	0.169282	0.265359	0.0597797	0.115175	mpl; UDP-N-acetylmuramate: L-alanyl-gamma-D-glutamyl-meso-diaminopimelate ligase [EC:6.3.2.45]
1426	K02560	-2.21373	-2.98922	-0.764283	2.34418	2.48628	0.8983	0.159669	0.00106014	0.0174517	0.000555288	0.0182407	lpxM, msbB; lauroyl-Kdo2-lipid IVA myristoyltransferase [EC:2.3.1.243]
1427	K02562	-3.30048	-4.57957	-2.5218	2.25641	4.11827	0.471471	0.281348	0.0595549	0.117924	0.0303909	0.0733693	mtlR; mannitol operon repressor
1428	K02563	6.24955	6.36206	5.87735	-0.61764	0.866575	-0.723285	0.217714	0.00253083	0.0173575	0.00487804	0.0274618	murG; UDP-N-acetylglucosamine--N-acetylmuramyl-(pentapeptide) pyrophosphoryl-undecaprenol N-acetylglucosamine transferase [EC:2.4.1.227]
1429	K02564	6.5463	6.78999	6.36349	-0.55813	0.867262	-0.609391	0.243143	0.00471922	0.0218321	0.0101182	0.0380439	nagB, GNPDA; glucosamine-6-phosphate deaminase [EC:3.5.99.6]
1430	K02565	-3.06462	-4.49189	-2.52485	2.03285	4.31234	0.406427	0.314571	0.0987783	0.172848	0.0788227	0.141862	nagC; N-acetylglucosamine repressor
1431	K02566	3.23252	3.56142	3.12924	-0.356756	1.25398	-0.237992	0.374571	0.620395	0.72194	0.227313	0.330566	nagD; NagD protein
1432	K02567	0.308511	0.263994	0.37524	0.332197	0.946927	0.292064	0.371894	0.179055	0.276759	0.234283	0.336311	napA; periplasmic nitrate reductase NapA [EC:1.7.99.-]
1433	K02568	-2.07435	-2.87955	-0.772027	1.82318	2.25462	0.755084	0.231429	0.00479219	0.02253	0.0079533	0.0339234	napB; cytochrome c-type protein NapB
1434	K02569	-0.882622	-1.29134	-0.491472	0.554742	1.97602	0.244179	0.399029	0.622759	0.721422	0.31126	0.422094	napC; cytochrome c-type protein NapC
1435	K02570	-0.670289	-0.823501	-0.35052	0.274049	1.62316	0.151953	0.432571	0.805373	0.864095	0.574218	0.677898	napD; periplasmic nitrate reductase NapD
1436	K02572	-2.51665	-3.22224	-0.784485	2.27021	2.69238	0.791243	0.209714	0.00309385	0.0191314	0.00446813	0.0273416	napF; ferredoxin-type protein NapF
1437	K02573	0.876784	1.02031	0.686823	-0.168634	0.880644	-0.1665	0.411143	0.676701	0.766179	0.428859	0.541014	napG; ferredoxin-type protein NapG
1438	K02574	0.551689	0.534485	0.563763	0.0379785	0.896606	0.0331651	0.477578	0.634198	0.731415	0.82782	0.879878	napH; ferredoxin-type protein NapH
1439	K02575	0.487226	-0.498358	0.640945	1.12716	1.73366	0.582993	0.266495	0.0263472	0.0687054	0.0259941	0.0671109	NRT, narK, nrtP, nasA; MFS transporter, NNP family, nitrate/nitrite transporter
1440	K02584	-4.86411	-1.55046	-9.01656	-5.67139	7.65966	-0.66162	0.23	0.0209187	0.0520591	0.0122464	0.04189	nifA; Nif-specific regulatory protein
1441	K02585	-1.22504	-0.677664	-1.91542	-1.24151	2.39859	-0.455208	0.283348	0.0622006	0.124494	0.0308688	0.0741856	nifB; nitrogen fixation protein NifB
1442	K02586	-7.41484	-5.33865	-8.37119	-1.36259	8.3321	-0.176068	0.406286	0.447937	0.548009	0.395684	0.496501	nifD; nitrogenase molybdenum-iron protein alpha chain [EC:1.18.6.1]
1443	K02587	1.1057	1.69381	0.558481	-1.25352	1.38195	-0.815735	0.144286	0.00108053	0.0173525	0.000421607	0.0178229	nifE; nitrogenase molybdenum-cofactor synthesis protein NifE
1444	K02588	2.03653	2.78639	1.3284	-1.18664	1.03444	-1.02846	0.125429	0.000196317	0.0173517	0.00011315	0.017775	nifH; nitrogenase iron protein NifH [EC:1.18.6.1]
1445	K02589	-5.9335	-5.54939	-6.17877	0.243566	6.33143	0.0374061	0.483714	0.721386	0.792722	0.808128	0.862682	nifHD1, nifI1; nitrogen regulatory protein PII 1
1446	K02590	-5.92799	-5.58586	-6.17329	0.20525	6.43141	0.0294248	0.485714	0.716434	0.788524	0.79942	0.85632	nifHD2, nifI2; nitrogen regulatory protein PII 2
1447	K02591	-2.08281	-1.5763	-2.49334	-0.970491	2.32321	-0.394032	0.243714	0.0399545	0.0906811	0.0145563	0.0467222	nifK; nitrogenase molybdenum-iron protein beta chain [EC:1.18.6.1]
1448	K02592	-9.98361	-9.55429	-10.2944	-0.626474	4.50016	-0.117905	0.437429	0.487917	0.567659	0.490192	0.567463	nifN; nitrogenase molybdenum-iron protein NifN
1449	K02594	-1.89281	-2.72453	-1.51203	1.06354	3.38074	0.250917	0.36561	0.347471	0.460707	0.198456	0.296093	nifV; homocitrate synthase NifV [EC:2.3.3.14]
1450	K02598	3.20257	3.29851	3.01229	-0.230255	0.999513	-0.19043	0.425593	0.404756	0.525368	0.505405	0.617182	nirC; nitrite transporter
1451	K02600	6.24919	6.3634	5.87798	-0.599174	0.854686	-0.730696	0.218286	0.00263889	0.0173763	0.00563537	0.0284727	nusA; N utilization substance protein A
1452	K02601	6.33438	6.46903	6.00871	-0.626107	0.849044	-0.738679	0.218795	0.00302464	0.0177235	0.00515054	0.0279457	nusG; transcriptional antiterminator NusG
1453	K02609	-8.44102	-9.01533	-7.74663	1.49811	5.27175	0.257233	0.37932	0.345425	0.438094	0.324755	0.415643	paaA; ring-1,2-phenylacetyl-CoA epoxidase subunit PaaA [EC:1.14.13.149]
1454	K02610	-8.49198	-9.00056	-7.83655	1.5069	5.30536	0.238236	0.389143	0.376612	0.468045	0.359813	0.449626	paaB; ring-1,2-phenylacetyl-CoA epoxidase subunit PaaB
1455	K02611	-8.45807	-9.02901	-7.82019	1.42913	5.39002	0.234435	0.387714	0.383553	0.472996	0.359833	0.450442	paaC; ring-1,2-phenylacetyl-CoA epoxidase subunit PaaC [EC:1.14.13.149]
1456	K02612	-8.48873	-9.04928	-7.77953	1.4888	5.31308	0.245151	0.388286	0.356204	0.446739	0.332004	0.422075	paaD; ring-1,2-phenylacetyl-CoA epoxidase subunit PaaD
1457	K02613	-8.46022	-8.9784	-7.81591	1.38371	5.30521	0.238199	0.389714	0.401216	0.490832	0.373014	0.461992	paaE; ring-1,2-phenylacetyl-CoA epoxidase subunit PaaE
1458	K02614	4.41313	4.79349	4.05997	-0.592142	0.960873	-0.509407	0.274857	0.012213	0.0404239	0.0329284	0.0771595	paaI; acyl-CoA thioesterase [EC:3.1.2.-]
1459	K02615	-8.46489	-9.06598	-7.75795	1.53354	5.30773	0.258525	0.381034	0.359089	0.44923	0.339064	0.429197	paaJ; 3-oxo-5,6-didehydrosuberyl-CoA/3-oxoadipyl-CoA thiolase [EC:2.3.1.223 2.3.1.174]
1460	K02616	-8.49074	-9.0106	-7.83055	1.44774	5.37213	0.246294	0.392571	0.38636	0.47779	0.356389	0.446665	paaX; phenylacetic acid degradation operon negative regulatory protein
1461	K02617	-8.48463	-9.01178	-7.81086	1.44468	5.36283	0.238126	0.39	0.372958	0.462954	0.358509	0.448395	paaY; phenylacetic acid degradation protein
1462	K02618	-8.44074	-9.03025	-7.771	1.46478	5.27292	0.246783	0.387032	0.359256	0.449317	0.334617	0.424343	paaZ; oxepin-CoA hydrolase / 3-oxo-5,6-dehydrosuberyl-CoA semialdehyde dehydrogenase [EC:3.3.2.12 1.2.1.91]
1463	K02619	4.79264	4.91817	4.72351	-0.628193	0.994535	-0.624904	0.262782	0.00303296	0.0178113	0.0218485	0.0607209	pabC; 4-amino-4-deoxychorismate lyase [EC:4.1.3.38]
1464	K02621	4.65218	4.71026	4.53805	-0.270968	0.923611	-0.289516	0.362857	0.137089	0.225495	0.206436	0.306239	parC; topoisomerase IV subunit A [EC:5.99.1.-]
1465	K02622	4.65487	4.71467	4.5372	-0.248492	0.914159	-0.261336	0.374	0.141304	0.230821	0.209581	0.309993	parE; topoisomerase IV subunit B [EC:5.99.1.-]
1466	K02624	-9.49995	-9.52697	-9.4864	0.464765	6.1299	0.0663132	0.466724	0.54648	0.631982	0.597842	0.676893	pcaR; IclR family transcriptional regulator, pca regulon regulatory protein
1467	K02626	-2.2919	-0.786362	-2.95607	-2.29003	8.40864	-0.286765	0.287714	0.186811	0.279049	0.0467456	0.0967636	pdaD; arginine decarboxylase [EC:4.1.1.19]
1468	K02647	5.77941	6.19065	5.44621	-0.751691	0.798319	-0.833943	0.197372	0.00184964	0.0173535	0.00318357	0.0256775	cdaR; carbohydrate diacid regulator
1469	K02650	3.7461	4.15427	3.44131	-0.657878	1.01786	-0.691319	0.215653	0.00457937	0.0214825	0.00458387	0.0272541	pilA; type IV pilus assembly protein PilA
1470	K02651	2.00365	2.16889	2.00073	-0.773999	2.22857	-0.24588	0.376178	0.101179	0.178313	0.239562	0.344549	flp, pilA; pilus assembly protein Flp/PilA
1471	K02652	4.30872	4.5084	4.17731	-0.410011	1.00006	-0.396065	0.324193	0.126327	0.2118	0.0912221	0.159536	pilB; type IV pilus assembly protein PilB
1472	K02653	5.61616	5.99982	5.4876	-0.543586	0.783559	-0.607898	0.27535	0.0160006	0.0484113	0.0275975	0.0696916	pilC; type IV pilus assembly protein PilC
1473	K02654	5.7702	6.07425	5.41864	-0.639301	0.81418	-0.749036	0.22565	0.00283078	0.0174916	0.00640474	0.0299051	pilD, pppA; leader peptidase (prepilin peptidase) / N-methyltransferase [EC:3.4.23.43 2.1.1.-]
1474	K02655	-3.74707	-1.66432	-6.85958	-2.65596	7.22956	-0.439798	0.253714	0.110843	0.180896	0.0209461	0.0569142	pilE; type IV pilus assembly protein PilE
1475	K02656	-4.28065	-7.17244	-3.30606	3.26604	5.91288	0.501022	0.277143	0.0504835	0.102022	0.0352361	0.0794186	pilF; type IV pilus assembly protein PilF
1476	K02662	3.04935	3.40174	2.77004	-0.601904	1.02753	-0.537713	0.264857	0.0368139	0.0868288	0.0229343	0.0625833	pilM; type IV pilus assembly protein PilM
1477	K02663	-9.41201	-9.83092	-9.05171	1.41971	5.11043	0.239629	0.395316	0.347839	0.431883	0.386602	0.468935	pilN; type IV pilus assembly protein PilN
1478	K02664	0.00690606	0.709241	-3.68028	-3.61179	6.4784	-0.50132	0.272286	0.0244578	0.0614911	0.0362986	0.0821027	pilO; type IV pilus assembly protein PilO
1479	K02666	-0.184687	0.441206	-0.824702	-1.64154	3.01174	-0.485367	0.216286	0.0102446	0.0353624	0.00547993	0.0287138	pilQ; type IV pilus assembly protein PilQ
1480	K02669	5.66649	5.96128	5.39371	-0.573468	0.833768	-0.65536	0.243429	0.00940302	0.0341396	0.0131298	0.0446562	pilT; twitching motility protein PilT
1481	K02671	-0.00303533	0.699964	-4.38677	-4.61263	8.13651	-0.596608	0.276492	0.0079954	0.0291444	0.029356	0.0719303	pilV; type IV pilus assembly protein PilV
1482	K02679	-2.21017	-3.00446	-0.774011	2.32811	2.51312	0.906868	0.153429	0.00108135	0.017417	0.000560888	0.0182178	ppdA; prepilin peptidase dependent protein A
1483	K02680	-2.10748	-2.99347	-0.769925	2.28254	2.50582	0.851829	0.163429	0.00137224	0.0175155	0.00075548	0.0187241	ppdB; prepilin peptidase dependent protein B
1484	K02681	-2.20585	-3.00483	-0.771541	2.34066	2.47015	0.878778	0.162857	0.00107684	0.0174112	0.000570644	0.0182812	ppdC; prepilin peptidase dependent protein C
1485	K02682	-2.21228	-2.99805	-0.775655	2.33147	2.47648	0.899967	0.154813	0.00108211	0.0174575	0.000526303	0.0180898	ppdD; prepilin peptidase dependent protein D
1486	K02686	0.186404	-0.429018	0.408485	0.820594	1.2754	0.612762	0.250286	0.0126688	0.041193	0.015292	0.0485655	priB; primosomal replication protein N
1487	K02687	6.01495	6.1646	5.74843	-0.59541	0.817772	-0.649392	0.215429	0.004212	0.020529	0.00410256	0.0267219	prmA; ribosomal protein L11 methyltransferase [EC:2.1.1.-]
1488	K02688	-2.53896	-2.8347	-2.31041	0.740507	3.57082	0.174298	0.407429	0.364904	0.477912	0.357626	0.470149	prpR; transcriptional regulator, propionate catabolism operon regulatory protein
1489	K02742	-2.21174	-2.99919	-0.767816	2.31186	2.51546	0.874234	0.154	0.00105863	0.017431	0.00053777	0.0181245	sprT; SprT protein
1490	K02744	3.3408	3.40972	3.15944	-0.339144	1.48006	-0.232096	0.406741	0.200419	0.303413	0.372684	0.486575	PTS-Aga-EIIA, agaF; PTS system, N-acetylgalactosamine-specific IIA component [EC:2.7.1.-]
1491	K02745	1.54846	1.6586	1.20052	-0.381851	1.48551	-0.235849	0.403028	0.328512	0.447404	0.361931	0.475382	PTS-Aga-EIIB, agaV; PTS system, N-acetylgalactosamine-specific IIB component [EC:2.7.1.-]
1492	K02746	1.88464	1.95522	1.83331	-0.0992663	1.66035	-0.0550336	0.477292	0.767744	0.837823	0.899784	0.933928	PTS-Aga-EIIC, agaW; PTS system, N-acetylgalactosamine-specific IIC component
1493	K02747	1.65584	1.69814	1.62568	-0.191321	1.47837	-0.117534	0.440286	0.508595	0.624036	0.567499	0.673853	PTS-Aga-EIID, agaE; PTS system, N-acetylgalactosamine-specific IID component
1494	K02750	0.0884325	-0.493959	0.894196	0.572574	2.59185	0.212231	0.401885	0.431428	0.551259	0.363774	0.477221	PTS-Glv-EIIC, glvC, malP, aglA; PTS system, alpha-glucoside-specific IIC component
1495	K02753	-3.28396	-4.58526	-2.15242	2.4417	3.99168	0.534213	0.245429	0.0383985	0.0861985	0.0132203	0.0445452	PTS-Asc-EIIC, ascF; PTS system, beta-glucoside (arbutin/salicin/cellobiose)-specific IIC component
1496	K02757	5.97317	6.11364	5.7168	-0.524088	0.854614	-0.581383	0.270209	0.00962268	0.0346377	0.0282277	0.0706522	PTS-Bgl-EIIC, bglF, bglP; PTS system, beta-glucoside-specific IIC component
1497	K02759	4.23566	3.94333	4.42739	0.247814	1.21586	0.207391	0.425878	0.392177	0.51292	0.499254	0.611998	PTS-Cel-EIIA, celC, chbA; PTS system, cellobiose-specific IIA component [EC:2.7.1.196 2.7.1.205]
1498	K02760	4.6732	4.32293	4.85067	0.32611	1.22535	0.252021	0.388857	0.370083	0.490592	0.294294	0.404475	PTS-Cel-EIIB, celA, chbB; PTS system, cellobiose-specific IIB component [EC:2.7.1.196 2.7.1.205]
1499	K02761	5.13864	4.85167	5.17811	0.607911	1.38855	0.398699	0.352857	0.0989075	0.175472	0.15989	0.249691	PTS-Cel-EIIC, celB, chbC; PTS system, cellobiose-specific IIC component
1500	K02763	0.287514	0.277164	0.321292	0.0407585	2.03176	0.0191305	0.489289	0.452655	0.571441	0.932758	0.955772	PTS-Dgl-EIIA, gamP; PTS system, D-glucosamine-specific IIA component [EC:2.7.1.-]
1501	K02765	4.93194	5.11944	4.61786	-0.584669	1.05489	-0.514151	0.297344	0.0176172	0.0517159	0.057773	0.112422	PTS-Dgl-EIIC, gamP; PTS system, D-glucosamine-specific IIC component
1502	K02768	3.86511	4.08132	3.64001	-0.598283	1.54528	-0.362627	0.361714	0.121391	0.205417	0.173449	0.266658	PTS-Fru-EIIA, fruB; PTS system, fructose-specific IIA component [EC:2.7.1.202]
1503	K02769	3.27569	3.46816	3.08784	-0.47859	1.80097	-0.268386	0.377714	0.253001	0.364758	0.282528	0.391902	PTS-Fru-EIIB, fruA; PTS system, fructose-specific IIB component [EC:2.7.1.202]
1504	K02770	5.9898	6.28609	5.77433	-0.604931	0.872621	-0.659555	0.239143	0.00721912	0.0285842	0.0127304	0.0439317	PTS-Fru-EIIC, fruA; PTS system, fructose-specific IIC component
1505	K02771	-4.98591	-4.74901	-5.12722	-0.702391	6.44567	-0.108156	0.442731	0.540254	0.634105	0.652422	0.738349	PTS-Fru1-EIID, levG; PTS system, fructose-specific IID component
1506	K02773	3.62319	4.45011	3.09109	-1.03726	1.33459	-0.771273	0.2008	0.0014176	0.0173527	0.00324616	0.0256877	PTS-Gat-EIIA, gatA, sgcA; PTS system, galactitol-specific IIA component [EC:2.7.1.200]
1507	K02774	3.59649	4.44937	3.11552	-1.05201	1.34663	-0.78101	0.189429	0.00101619	0.0173525	0.00215897	0.0239936	PTS-Gat-EIIB, gatB, sgcB; PTS system, galactitol-specific IIB component [EC:2.7.1.200]
1508	K02775	4.75097	5.25203	4.36217	-0.68667	1.03786	-0.667381	0.247929	0.00594475	0.0251739	0.0109615	0.039989	PTS-Gat-EIIC, gatC, sgcC; PTS system, galactitol-specific IIC component
1509	K02777	2.31445	1.71637	2.44993	0.367371	1.66529	0.203494	0.421429	0.516458	0.631465	0.495349	0.608253	PTS-Glc-EIIA, crr; PTS system, sugar-specific IIA component [EC:2.7.1.-]
1510	K02778	-9.62569	-9.57333	-9.66	0.0460794	4.91113	0.0101091	0.495001	0.584321	0.667275	0.59302	0.671581	PTS-Glc-EIIB, ptsG; PTS system, glucose-specific IIB component [EC:2.7.1.199]
1511	K02779	1.5246	1.14091	1.5722	0.488653	1.46081	0.313614	0.378	0.296485	0.412936	0.255429	0.361785	PTS-Glc-EIIC, ptsG; PTS system, glucose-specific IIC component
1512	K02781	3.16957	3.52028	2.73594	-0.749188	1.35634	-0.541902	0.258	0.0127998	0.0417077	0.0210057	0.0596716	PTS-Gut-EIIA, srlB; PTS system, glucitol/sorbitol-specific IIA component [EC:2.7.1.198]
1513	K02782	-9.73595	-9.4134	-9.97408	-0.406911	5.52286	-0.0719829	0.463143	0.558404	0.644284	0.551197	0.632292	PTS-Gut-EIIB, srlE; PTS system, glucitol/sorbitol-specific IIB component [EC:2.7.1.198]
1514	K02783	2.54938	3.51447	2.31751	-1.0183	1.51413	-0.648967	0.249357	0.00839707	0.0316367	0.0118774	0.0420535	PTS-Gut-EIIC, srlA; PTS system, glucitol/sorbitol-specific IIC component
1515	K02784	-1.22884	-2.1115	-0.548554	1.36295	2.26427	0.499766	0.29563	0.0638579	0.126971	0.0455443	0.0951268	PTS-HPR.PTSH, ptsH; phosphocarrier protein HPr
1516	K02786	-1.21838	-1.59509	-0.323762	0.506712	2.98413	0.169865	0.421023	0.494103	0.610215	0.425747	0.539604	PTS-Lac-EIIA, lacF; PTS system, lactose-specific IIA component [EC:2.7.1.207]
1517	K02788	0.408456	-0.20033	0.599495	0.967451	3.01751	0.334824	0.363143	0.203198	0.30664	0.213926	0.315064	PTS-Lac-EIIC, lacE; PTS system, lactose-specific IIC component
1518	K02791	-0.07855	-0.724195	0.231404	0.993119	2.44182	0.352395	0.335047	0.335838	0.451944	0.107952	0.182199	PTS-MalGlc-EIIC, malX; PTS system, maltose/glucose-specific IIC component
1519	K02793	4.19974	4.65045	4.10576	-0.357683	1.37707	-0.256341	0.388571	0.203104	0.306614	0.282247	0.3915	PTS-Man-EIIA, manX; PTS system, mannose-specific IIA component [EC:2.7.1.191]
1520	K02794	5.45601	5.69459	5.10926	-0.480054	1.20338	-0.389571	0.334857	0.108744	0.188673	0.109667	0.184436	PTS-Man-EIIB, manX; PTS system, mannose-specific IIB component [EC:2.7.1.191]
1521	K02795	5.06847	5.56329	4.98842	-0.42484	1.17099	-0.355507	0.347714	0.136671	0.225007	0.147922	0.234395	PTS-Man-EIIC, manY; PTS system, mannose-specific IIC component
1522	K02796	4.65496	5.10202	4.46966	-0.368596	1.16004	-0.302706	0.390746	0.244518	0.35502	0.303172	0.413983	PTS-Man-EIID, manZ; PTS system, mannose-specific IID component
1523	K02798	2.48486	2.8754	2.37457	-0.430154	1.53425	-0.270574	0.396857	0.309217	0.42696	0.313735	0.425199	PTS-Mtl-EIIA, mtlA, cmtB; PTS system, mannitol-specific IIA component [EC:2.7.1.197]
1524	K02800	3.89315	4.12827	3.69374	-0.828243	1.47832	-0.555932	0.275714	0.0119563	0.0398711	0.0258929	0.0672839	PTS-Mtl-EIIC, mtlA, cmtA; PTS system, mannitol-specific IIC component
1525	K02802	-9.59361	-9.64715	-9.54541	0.275592	5.0132	0.0441807	0.475714	0.558102	0.643752	0.59638	0.674671	PTS-Nag-EIIA, nagE; PTS system, N-acetylglucosamine-specific IIA component [EC:2.7.1.193]
1526	K02803	-9.53541	-9.56376	-9.51228	0.302657	5.38291	0.0530477	0.476571	0.562571	0.647616	0.608276	0.685719	PTS-Nag-EIIB, nagE; PTS system, N-acetylglucosamine-specific IIB component [EC:2.7.1.193]
1527	K02804	4.34681	4.58942	4.05981	-0.529328	1.05202	-0.480803	0.306857	0.0690465	0.134525	0.0596452	0.115077	PTS-Nag-EIIC, nagE; PTS system, N-acetylglucosamine-specific IIC component
1528	K02805	2.56486	2.95832	2.43982	-0.523782	0.876106	-0.551551	0.271143	0.0278286	0.0714628	0.0249812	0.0654231	wecE, rffA; dTDP-4-amino-4,6-dideoxygalactose transaminase [EC:2.6.1.59]
1529	K02806	0.307451	-0.00513715	0.493721	0.530088	1.36986	0.36137	0.333905	0.0956097	0.170782	0.106716	0.180124	PTS-Ntr-EIIA, ptsN; PTS system, nitrogen regulatory IIA component [EC:2.7.1.-]
1530	K02810	4.92941	5.27207	4.77296	-0.658964	0.881039	-0.694002	0.249643	0.00503736	0.0226931	0.0155851	0.0497313	PTS-Scr-EIIC, scrA, sacP, sacX, ptsS; PTS system, sucrose-specific IIC component
1531	K02812	-3.63409	-4.57606	-2.77536	1.96081	4.07628	0.4262	0.282491	0.0841537	0.152095	0.0447601	0.093976	PTS-Sor-EIIA, sorF; PTS system, sorbose-specific IIA component [EC:2.7.1.206]
1532	K02813	1.13671	1.71187	0.95942	-0.772419	1.87802	-0.393726	0.340571	0.133835	0.221222	0.131263	0.212951	PTS-Sor-EIIB, sorB; PTS system, sorbose-specific IIB component [EC:2.7.1.206]
1533	K02814	0.972484	1.71702	0.766235	-0.981381	1.97322	-0.470033	0.304571	0.0570621	0.117435	0.0625968	0.11926	PTS-Sor-EIIC, sorA; PTS system, sorbose-specific IIC component
1534	K02815	0.975809	1.71557	0.765772	-0.96936	2.00269	-0.449219	0.318857	0.0682156	0.133311	0.0717816	0.132339	PTS-Sor-EIID, sorM; PTS system, sorbose-specific IID component
1535	K02819	2.21887	2.7887	2.06628	-0.570496	1.107	-0.502399	0.288489	0.0344997	0.0829655	0.0420328	0.0901771	PTS-Tre-EIIC, treB; PTS system, trehalose-specific IIC component
1536	K02821	3.09423	3.32372	3.0308	-0.41111	1.39324	-0.307256	0.371608	0.17484	0.272489	0.223094	0.325535	PTS-Ula-EIIA, ulaC, sgaA; PTS system, ascorbate-specific IIA component [EC:2.7.1.194]
1537	K02822	3.22673	3.42319	3.00633	-0.611813	1.4273	-0.451295	0.303628	0.0452395	0.100082	0.0601999	0.115882	PTS-Ula-EIIB, ulaB, sgaB; PTS system, ascorbate-specific IIB component [EC:2.7.1.194]
1538	K02823	6.10661	6.32518	5.84854	-0.681154	0.871416	-0.768997	0.182286	0.00139451	0.0173527	0.0014552	0.0218005	pyrDII; dihydroorotate dehydrogenase electron transfer subunit
1539	K02824	5.35407	5.60399	5.10574	-0.46393	0.889457	-0.507944	0.295059	0.0995525	0.176277	0.0429665	0.0914757	pyrP, uraA; uracil permease
1540	K02825	2.80772	3.06838	2.68024	-0.291413	1.37835	-0.194139	0.407429	0.69946	0.78545	0.40646	0.520972	pyrR; pyrimidine operon attenuation protein / uracil phosphoribosyltransferase [EC:2.4.2.9]
1541	K02826	-10.1827	-9.98779	-10.3315	-0.209044	4.66555	-0.0375568	0.483576	0.515734	0.603771	0.524218	0.607739	qoxA; cytochrome aa3-600 menaquinol oxidase subunit II [EC:1.10.3.12]
1542	K02827	-10.158	-9.99553	-10.2889	-0.08135	4.5925	-0.0170981	0.491143	0.530047	0.61575	0.55897	0.63948	qoxB; cytochrome aa3-600 menaquinol oxidase subunit I [EC:1.10.3.12]
1543	K02828	-10.229	-10.1143	-10.3177	-0.0758457	4.64854	-0.0134463	0.493714	0.532254	0.617114	0.55088	0.632127	qoxC; cytochrome aa3-600 menaquinol oxidase subunit III [EC:1.10.3.12]
1544	K02829	-10.2243	-10.0616	-10.3581	-0.0968606	4.5807	-0.0158694	0.490857	0.529828	0.615179	0.551106	0.628733	qoxD; cytochrome aa3-600 menaquinol oxidase subunit IV [EC:1.10.3.12]
1545	K02834	6.24728	6.35556	5.87817	-0.629283	0.854609	-0.733795	0.215938	0.00255878	0.0173612	0.00496861	0.027557	rbfA; ribosome-binding factor A
1546	K02835	6.24872	6.36187	5.87881	-0.612573	0.856297	-0.731328	0.215367	0.00253385	0.017359	0.00485953	0.0274585	prfA, MTRF1, MRF1; peptide chain release factor 1
1547	K02836	6.249	6.3585	5.87835	-0.620239	0.851947	-0.738241	0.212225	0.00251168	0.0173583	0.00484303	0.0274834	prfB; peptide chain release factor 2
1548	K02837	5.99591	6.19443	5.76486	-0.578788	0.85814	-0.658763	0.229649	0.00571667	0.024549	0.00808072	0.0333927	prfC; peptide chain release factor 3
1549	K02838	6.24851	6.36186	5.87852	-0.610478	0.868436	-0.707592	0.216286	0.00254196	0.017359	0.00489588	0.0274938	frr, MRRF, RRF; ribosome recycling factor
1550	K02839	-0.716806	-0.438117	-1.18234	-0.465974	2.49026	-0.14477	0.410454	0.437477	0.555906	0.40716	0.520996	prfH; peptide chain release factor
1551	K02840	-10.1522	-10.1116	-10.1846	0.190159	4.88781	0.0330608	0.482571	0.548899	0.630666	0.566218	0.644806	waaB, rfaB; UDP-D-galactose:(glucosyl)LPS alpha-1,6-D-galactosyltransferase [EC:2.4.1.-]
1552	K02841	0.973039	0.863699	1.06365	0.112263	1.37067	0.0716547	0.456571	0.900275	0.933215	0.696562	0.781231	waaC, rfaC; heptosyltransferase I [EC:2.4.-.-]
1553	K02843	2.4103	2.54848	1.889	-0.771363	1.25182	-0.58145	0.252286	0.0197359	0.0559874	0.0172922	0.052869	waaF, rfaF; heptosyltransferase II [EC:2.4.-.-]
1554	K02844	-2.07284	-2.20187	-1.95284	0.254625	2.52884	0.0774502	0.447586	0.446577	0.563675	0.639019	0.731615	waaG, rfaG; UDP-glucose:(heptosyl)LPS alpha-1,3-glucosyltransferase [EC:2.4.1.-]
1555	K02846	-3.29708	-4.50509	-2.52591	2.19672	4.01294	0.483544	0.268571	0.0590372	0.116788	0.0272438	0.06863	solA; N-methyl-L-tryptophan oxidase [EC:1.5.3.-]
1556	K02847	-2.28004	-3.20349	-0.778378	2.34294	2.51645	0.884753	0.171094	0.00124351	0.0174723	0.00103821	0.0197754	waaL, rfaL; O-antigen ligase [EC:2.4.1.-]
1557	K02848	-4.20059	-4.87337	-2.78048	2.00678	4.56302	0.378035	0.328192	0.170834	0.260073	0.103073	0.1747	waaP, rfaP; heptose I phosphotransferase [EC:2.7.1.-]
1558	K02849	-1.82065	-1.76072	-1.84997	-0.0411123	2.17261	-0.0170391	0.491429	0.875341	0.914506	0.895608	0.929578	waaQ, rfaQ; heptosyltransferase III [EC:2.4.-.-]
1559	K02850	-4.07186	-4.56316	-3.30709	0.958451	4.98567	0.160721	0.424	0.516386	0.619223	0.507016	0.615396	waaY, rfaY; heptose II phosphotransferase [EC:2.7.1.-]
1560	K02851	3.68221	4.45918	3.4894	-0.836045	1.16832	-0.649986	0.265638	0.00999599	0.0354881	0.0221654	0.0613978	wecA, tagO, rfe; UDP-GlcNAc:undecaprenyl-phosphate/decaprenyl-phosphate GlcNAc-1-phosphate transferase [EC:2.7.8.33 2.7.8.35]
1561	K02852	0.338816	1.30419	-0.173126	-1.50367	2.28628	-0.606799	0.265067	0.0121085	0.0401514	0.0208029	0.0592206	wecG, rffM; UDP-N-acetyl-D-mannosaminouronate:lipid I N-acetyl-D-mannosaminouronosyltransferase [EC:2.4.1.180]
1562	K02853	-3.32201	-4.57449	-2.51337	2.32474	4.22227	0.473943	0.281063	0.059832	0.118009	0.0301422	0.0729239	wzyE, rffT; enterobacterial common antigen polymerase [EC:2.4.1.-]
1563	K02854	-3.4424	-4.58598	-2.52547	2.24326	4.15693	0.462917	0.277429	0.0598157	0.118142	0.0309871	0.0741531	rhaR; AraC family transcriptional regulator, L-rhamnose operon transcriptional activator RhaR
1564	K02855	-3.0642	-4.54851	-2.22435	2.255	4.29162	0.470151	0.286204	0.06876	0.131021	0.0415257	0.0894178	rhaS; AraC family transcriptional regulator, L-rhamnose operon regulatory protein RhaS
1565	K02856	3.72375	4.38027	3.62617	-0.619467	1.80238	-0.344416	0.311911	0.0842853	0.155548	0.0660215	0.12413	rhaT; L-rhamnose-H+ transport protein
1566	K02858	-0.0732925	-0.258311	0.0391641	0.519621	2.19902	0.247861	0.362571	0.184758	0.284257	0.210323	0.309582	ribB, RIB3; 3,4-dihydroxy 2-butanone 4-phosphate synthase [EC:4.1.99.12]
1567	K02859	-1.73309	-1.96949	-1.73309	0.229345	5.65359	0.0345056	0.480149	0.727194	0.802541	0.877156	0.916737	ribT; riboflavin biosynthesis RibT protein
1568	K02860	6.24872	6.35636	5.87697	-0.616543	0.863348	-0.725467	0.213429	0.00259134	0.0173702	0.00495424	0.0275771	rimM; 16S rRNA processing protein RimM
1569	K02862	-10.2075	-10.0573	-10.3297	-0.0441525	4.59827	-0.00772601	0.495001	0.514339	0.600728	0.545262	0.624474	ctaG; putative membrane protein
1570	K02863	6.24762	6.36114	5.87967	-0.614433	0.846874	-0.730893	0.215367	0.00256333	0.0173601	0.00486697	0.0274623	RP-L1, MRPL1, rplA; large subunit ribosomal protein L1
1571	K02864	6.22871	6.35897	5.87894	-0.620223	0.867722	-0.721288	0.219714	0.00284843	0.0174916	0.00583364	0.0288304	RP-L10, MRPL10, rplJ; large subunit ribosomal protein L10
1572	K02867	6.24766	6.36023	5.87858	-0.609929	0.867222	-0.728078	0.215143	0.00254689	0.0173586	0.00494724	0.0275696	RP-L11, MRPL11, rplK; large subunit ribosomal protein L11
1573	K02871	6.24779	6.35798	5.87861	-0.632806	0.869364	-0.716382	0.208	0.00248488	0.0173574	0.00455759	0.0272017	RP-L13, MRPL13, rplM; large subunit ribosomal protein L13
1574	K02874	6.24931	6.35958	5.87758	-0.602382	0.864159	-0.718504	0.218509	0.00254908	0.0173608	0.00490593	0.0275221	RP-L14, MRPL14, rplN; large subunit ribosomal protein L14
1575	K02876	6.24894	6.35883	5.87936	-0.611043	0.861829	-0.714513	0.213939	0.00255275	0.0173627	0.00488638	0.0274848	RP-L15, MRPL15, rplO; large subunit ribosomal protein L15
1576	K02878	6.24876	6.36052	5.87805	-0.625106	0.859688	-0.736035	0.217081	0.00256194	0.017363	0.00491882	0.0275434	RP-L16, MRPL16, rplP; large subunit ribosomal protein L16
1577	K02879	6.24905	6.35812	5.87766	-0.641867	0.864227	-0.730654	0.205656	0.00253439	0.0173614	0.00494394	0.0275496	RP-L17, MRPL17, rplQ; large subunit ribosomal protein L17
1578	K02881	6.24817	6.35926	5.87855	-0.62023	0.856931	-0.73156	0.208797	0.00254769	0.0173622	0.00488992	0.0274942	RP-L18, MRPL18, rplR; large subunit ribosomal protein L18
1579	K02884	6.24822	6.35816	5.87909	-0.640229	0.860592	-0.731805	0.215653	0.0025703	0.0173632	0.00494844	0.0275527	RP-L19, MRPL19, rplS; large subunit ribosomal protein L19
1580	K02886	6.24852	6.36027	5.87796	-0.611465	0.860889	-0.724006	0.210511	0.00254635	0.0173617	0.00488077	0.0274861	RP-L2, MRPL2, rplB; large subunit ribosomal protein L2
1581	K02887	6.24873	6.36256	5.87632	-0.626836	0.860921	-0.742487	0.212571	0.00252078	0.0173583	0.00480011	0.0274099	RP-L20, MRPL20, rplT; large subunit ribosomal protein L20
1582	K02888	6.24836	6.35823	5.87846	-0.606063	0.867712	-0.722752	0.217938	0.00254001	0.0173587	0.00493137	0.0275359	RP-L21, MRPL21, rplU; large subunit ribosomal protein L21
1583	K02890	6.24884	6.3615	5.87626	-0.615478	0.864134	-0.723829	0.207714	0.00254596	0.0173606	0.00488428	0.0275121	RP-L22, MRPL22, rplV; large subunit ribosomal protein L22
1584	K02892	6.24887	6.36299	5.87717	-0.631754	0.871408	-0.731469	0.212511	0.00252116	0.0173599	0.00482981	0.0274334	RP-L23, MRPL23, rplW; large subunit ribosomal protein L23
1585	K02895	6.24891	6.36147	5.87681	-0.609756	0.857205	-0.714569	0.216224	0.00252903	0.0173592	0.00486813	0.0274661	RP-L24, MRPL24, rplX; large subunit ribosomal protein L24
1586	K02897	5.28683	5.45816	5.12163	-0.607406	0.890178	-0.662207	0.231714	0.00328479	0.0182725	0.00991672	0.0375444	RP-L25, rplY; large subunit ribosomal protein L25
1587	K02899	6.24912	6.36158	5.87839	-0.617079	0.86667	-0.711884	0.213939	0.00255926	0.017365	0.0048985	0.0275083	RP-L27, MRPL27, rpmA; large subunit ribosomal protein L27
1588	K02902	6.24874	6.35956	5.87724	-0.623727	0.869608	-0.71324	0.204	0.00247111	0.017355	0.00448043	0.027143	RP-L28, MRPL28, rpmB; large subunit ribosomal protein L28
1589	K02904	6.24823	6.35703	5.87892	-0.601096	0.862049	-0.717496	0.217366	0.00250155	0.0173582	0.00431722	0.0269591	RP-L29, rpmC; large subunit ribosomal protein L29
1590	K02906	6.24817	6.36144	5.87889	-0.614462	0.859573	-0.715639	0.220223	0.00251235	0.0173598	0.00485741	0.027477	RP-L3, MRPL3, rplC; large subunit ribosomal protein L3
1591	K02907	6.05036	6.21817	5.559	-0.679993	0.821047	-0.817279	0.220223	0.00080348	0.0173522	0.00452842	0.0271467	RP-L30, MRPL30, rpmD; large subunit ribosomal protein L30
1592	K02909	6.25641	6.36484	5.89734	-0.599347	0.84533	-0.727361	0.213429	0.00265018	0.0173776	0.00517707	0.0278393	RP-L31, rpmE; large subunit ribosomal protein L31
1593	K02911	6.24654	6.35586	5.8789	-0.63557	0.871133	-0.721465	0.210511	0.00245515	0.0173557	0.00409358	0.026765	RP-L32, MRPL32, rpmF; large subunit ribosomal protein L32
1594	K02913	6.22958	6.32916	5.94703	-0.506271	0.835987	-0.619757	0.249143	0.00882215	0.0327282	0.0134771	0.0452983	RP-L33, MRPL33, rpmG; large subunit ribosomal protein L33
1595	K02914	6.16414	6.2882	5.85808	-0.592076	0.837153	-0.70178	0.218223	0.00284402	0.0174835	0.00519859	0.027977	RP-L34, MRPL34, rpmH; large subunit ribosomal protein L34
1596	K02916	6.22545	6.3586	5.87879	-0.642514	0.855267	-0.757163	0.194857	0.00209453	0.0173541	0.00259833	0.0249124	RP-L35, MRPL35, rpmI; large subunit ribosomal protein L35
1597	K02919	5.46921	5.59259	4.92531	-0.541513	0.832435	-0.574105	0.262857	0.0159915	0.0483901	0.0227781	0.0621469	RP-L36, MRPL36, rpmJ; large subunit ribosomal protein L36
1598	K02926	6.24865	6.36091	5.87764	-0.603057	0.872221	-0.72457	0.208857	0.00256394	0.0173595	0.00493493	0.0275669	RP-L4, MRPL4, rplD; large subunit ribosomal protein L4
1599	K02931	6.22959	6.35912	5.8778	-0.6104	0.872068	-0.700486	0.222508	0.00291197	0.0175664	0.00629957	0.0296454	RP-L5, MRPL5, rplE; large subunit ribosomal protein L5
1600	K02933	6.24866	6.35992	5.87826	-0.626718	0.866932	-0.731414	0.215653	0.00255646	0.0173604	0.00493021	0.0275642	RP-L6, MRPL6, rplF; large subunit ribosomal protein L6
1601	K02935	6.24819	6.36092	5.87889	-0.59746	0.870068	-0.708659	0.214225	0.00247946	0.0173561	0.00423817	0.0268985	RP-L7, MRPL12, rplL; large subunit ribosomal protein L7/L12
1602	K02939	6.24881	6.35955	5.87957	-0.612799	0.869827	-0.727128	0.218286	0.00256268	0.0173604	0.00495499	0.0275716	RP-L9, MRPL9, rplI; large subunit ribosomal protein L9
1603	K02945	6.4921	6.64292	6.00556	-0.708343	0.831716	-0.816413	0.196571	0.00107109	0.0173525	0.00310274	0.0255346	RP-S1, rpsA; small subunit ribosomal protein S1
1604	K02946	6.24747	6.36124	5.87924	-0.636646	0.864392	-0.735085	0.211368	0.00248152	0.0173568	0.00451888	0.0271679	RP-S10, MRPS10, rpsJ; small subunit ribosomal protein S10
1605	K02948	6.24837	6.36099	5.87704	-0.591051	0.869598	-0.715951	0.212571	0.00256432	0.017364	0.00493649	0.0275431	RP-S11, MRPS11, rpsK; small subunit ribosomal protein S11
1606	K02950	6.2475	6.35818	5.8775	-0.613693	0.864707	-0.720139	0.218	0.00254266	0.0173593	0.00494241	0.0275609	RP-S12, MRPS12, rpsL; small subunit ribosomal protein S12
1607	K02952	6.24772	6.36004	5.87885	-0.609189	0.846238	-0.733346	0.211714	0.00255002	0.0173616	0.00486952	0.027467	RP-S13, rpsM; small subunit ribosomal protein S13
1608	K02954	6.22735	6.35929	5.87901	-0.637666	0.848497	-0.743088	0.210286	0.00252733	0.017358	0.00461848	0.0272398	RP-S14, MRPS14, rpsN; small subunit ribosomal protein S14
1609	K02956	6.24891	6.35906	5.87894	-0.623202	0.848895	-0.73892	0.216795	0.00254389	0.0173604	0.00492033	0.0275591	RP-S15, MRPS15, rpsO; small subunit ribosomal protein S15
1610	K02959	6.24905	6.36102	5.87859	-0.608961	0.853863	-0.721749	0.218223	0.00256624	0.0173627	0.00493486	0.0275497	RP-S16, MRPS16, rpsP; small subunit ribosomal protein S16
1611	K02961	6.22923	6.3592	5.87803	-0.64202	0.864002	-0.726612	0.213143	0.00284216	0.0174879	0.00588029	0.0288886	RP-S17, MRPS17, rpsQ; small subunit ribosomal protein S17
1612	K02963	6.24732	6.35995	5.87708	-0.62502	0.858108	-0.73955	0.211368	0.0025025	0.0173572	0.00429029	0.0269448	RP-S18, MRPS18, rpsR; small subunit ribosomal protein S18
1613	K02965	6.24821	6.36026	5.87723	-0.591888	0.862054	-0.727038	0.217429	0.00255311	0.017361	0.00496615	0.0275588	RP-S19, rpsS; small subunit ribosomal protein S19
1614	K02967	6.24837	6.36262	5.87702	-0.629551	0.872744	-0.710853	0.210571	0.00252972	0.0173589	0.00477024	0.0273756	RP-S2, MRPS2, rpsB; small subunit ribosomal protein S2
1615	K02968	6.24779	6.35945	5.87713	-0.628344	0.862636	-0.727606	0.205429	0.00246778	0.0173563	0.00429457	0.0269465	RP-S20, rpsT; small subunit ribosomal protein S20
1616	K02970	6.01412	6.17367	5.74266	-0.581903	0.838735	-0.611192	0.234	0.00963653	0.034688	0.00908577	0.0356271	RP-S21, MRPS21, rpsU; small subunit ribosomal protein S21
1617	K02972	-3.6907	-4.57837	-2.76996	1.94622	4.13983	0.409886	0.30934	0.088352	0.158189	0.0614601	0.117536	sra; stationary-phase-induced ribosome-associated protein
1618	K02982	6.24809	6.36189	5.87731	-0.606978	0.86403	-0.731661	0.209429	0.00256556	0.0173601	0.00497238	0.0275682	RP-S3, rpsC; small subunit ribosomal protein S3
1619	K02986	6.27266	6.39686	6.01581	-0.595695	0.85127	-0.703556	0.211368	0.00317706	0.0179956	0.00454382	0.0272142	RP-S4, rpsD; small subunit ribosomal protein S4
1620	K02988	6.2487	6.36279	5.87985	-0.636415	0.870159	-0.73258	0.212225	0.00254956	0.0173616	0.00489121	0.0275137	RP-S5, MRPS5, rpsE; small subunit ribosomal protein S5
1621	K02990	6.24789	6.36159	5.87729	-0.615136	0.859103	-0.736586	0.208512	0.00253258	0.0173587	0.00469137	0.0273045	RP-S6, MRPS6, rpsF; small subunit ribosomal protein S6
1622	K02992	6.24845	6.36105	5.87643	-0.652684	0.860792	-0.754022	0.203143	0.00260862	0.0173689	0.00545183	0.0281736	RP-S7, MRPS7, rpsG; small subunit ribosomal protein S7
1623	K02994	6.24899	6.36195	5.87774	-0.608424	0.866746	-0.721129	0.215367	0.00257402	0.017363	0.00487618	0.0275099	RP-S8, rpsH; small subunit ribosomal protein S8
1624	K02996	6.22857	6.36019	5.87981	-0.616842	0.870692	-0.705497	0.22108	0.00283643	0.0174819	0.00582239	0.0288046	RP-S9, MRPS9, rpsI; small subunit ribosomal protein S9
1625	K03040	6.25985	6.37986	5.91673	-0.609715	0.869747	-0.699689	0.232	0.00336736	0.0184232	0.00774383	0.0326294	rpoA; DNA-directed RNA polymerase subunit alpha [EC:2.7.7.6]
1626	K03043	6.25119	6.37189	5.87874	-0.608234	0.851845	-0.712348	0.218286	0.00256773	0.0173642	0.00548602	0.0282564	rpoB; DNA-directed RNA polymerase subunit beta [EC:2.7.7.6]
1627	K03046	6.25334	6.36134	5.87894	-0.623621	0.862772	-0.732826	0.218509	0.0026646	0.0173827	0.00598436	0.0290277	rpoC; DNA-directed RNA polymerase subunit beta' [EC:2.7.7.6]
1628	K03048	1.87707	1.56877	2.16346	0.606278	2.14428	0.288226	0.341902	0.216967	0.322976	0.133985	0.216309	rpoE; DNA-directed RNA polymerase subunit delta
1629	K03060	5.49956	5.82392	4.82219	-0.789194	0.859371	-0.908189	0.193945	0.000435927	0.0173517	0.00231991	0.0243358	rpoZ; DNA-directed RNA polymerase subunit omega [EC:2.7.7.6]
1630	K03070	6.27327	6.38778	5.97222	-0.616503	0.835855	-0.708773	0.22108	0.00348861	0.01872	0.00668192	0.0303533	secA; preprotein translocase subunit SecA
1631	K03071	0.353403	-0.0097821	0.581669	0.718003	1.2031	0.531753	0.288571	0.0279008	0.071343	0.0404362	0.0877834	secB; preprotein translocase subunit SecB
1632	K03072	2.32746	3.19593	2.19257	-0.665416	1.3778	-0.453472	0.306198	0.0563145	0.116456	0.0580754	0.112851	secD; preprotein translocase subunit SecD
1633	K03073	6.16063	6.28582	5.7991	-0.630528	0.816357	-0.745301	0.213143	0.00191972	0.0173538	0.00539229	0.0282733	secE; preprotein translocase subunit SecE
1634	K03074	2.32827	3.20132	2.17339	-0.672634	1.41192	-0.459722	0.29363	0.0521206	0.110369	0.054693	0.108047	secF; preprotein translocase subunit SecF
1635	K03075	6.22914	6.34867	5.87917	-0.606593	0.877485	-0.701394	0.224507	0.00291633	0.0175657	0.00623069	0.0295054	secG; preprotein translocase subunit SecG
1636	K03076	6.25386	6.3629	5.88465	-0.604741	0.848022	-0.718764	0.211654	0.00297701	0.0176496	0.00551189	0.0282622	secY; preprotein translocase subunit SecY
1637	K03077	2.85637	3.69382	2.55518	-1.03386	1.28226	-0.747033	0.194801	0.0017886	0.0173537	0.00264279	0.0247802	araD, ulaF, sgaE, sgbE; L-ribulose-5-phosphate 4-epimerase [EC:5.1.3.4]
1638	K03078	-1.68053	-2.79657	-0.592506	2.10532	2.09964	0.947746	0.145143	0.000517535	0.017353	0.000278688	0.017798	ulaD, sgaH, sgbH; 3-dehydro-L-gulonate-6-phosphate decarboxylase [EC:4.1.1.85]
1639	K03079	1.93625	2.20676	1.86916	-0.575337	1.80925	-0.300832	0.39	0.224625	0.331871	0.312374	0.423639	ulaE, sgaU, sgbU; L-ribulose-5-phosphate 3-epimerase [EC:5.1.3.22]
1640	K03086	6.77503	6.92767	6.44951	-0.702404	0.867192	-0.766164	0.182571	0.00161815	0.0173533	0.00177291	0.0229549	rpoD; RNA polymerase primary sigma factor
1641	K03087	-3.31307	-4.58343	-2.40406	2.33435	4.13899	0.477911	0.271429	0.0571988	0.114057	0.0275218	0.0690221	rpoS; RNA polymerase nonessential primary-like sigma factor
1642	K03088	9.07028	9.30106	8.66505	-0.664291	0.882083	-0.740719	0.192857	0.00178093	0.0173533	0.00252579	0.0246396	rpoE; RNA polymerase sigma-70 factor, ECF subfamily
1643	K03089	0.250974	0.0791162	0.428326	0.495518	1.04449	0.405173	0.301143	0.079488	0.148703	0.0717451	0.13197	rpoH; RNA polymerase sigma-32 factor
1644	K03090	0.94605	1.37613	0.345383	-0.998296	2.13043	-0.361188	0.285061	0.105653	0.184307	0.0375078	0.0838213	sigB; RNA polymerase sigma-B factor
1645	K03091	7.57559	8.05966	7.39708	-0.669197	0.879122	-0.71244	0.200857	0.00882741	0.0327775	0.00340325	0.0259027	sigH; RNA polymerase sporulation-specific sigma factor
1646	K03092	5.13333	5.33763	4.87518	-0.637593	0.901616	-0.641105	0.253071	0.00376442	0.0194017	0.0147749	0.0480794	rpoN; RNA polymerase sigma-54 factor
1647	K03093	-1.60094	-1.4802	-1.71452	-0.167831	2.59427	-0.0513126	0.47158	0.578419	0.683105	0.792551	0.855988	sigI; RNA polymerase sigma factor
1648	K03095	-0.358576	-0.603426	-0.136117	0.349316	3.16672	0.0957387	0.450857	0.906889	0.937612	0.666394	0.7576	sprL; SprT-like protein
1649	K03098	0.207219	1.41187	-0.0590655	-1.53951	2.20485	-0.47198	0.237932	0.603359	0.699716	0.0114816	0.0411874	APOD; apolipoprotein D and lipocalin family protein
1650	K03100	7.36205	7.584	7.10846	-0.641672	0.83975	-0.819167	0.181143	0.00060742	0.0173517	0.00137291	0.021483	lepB; signal peptidase I [EC:3.4.21.89]
1651	K03101	6.45645	6.56215	6.04235	-0.646591	0.858585	-0.750268	0.211083	0.00196284	0.0173538	0.00415387	0.0267544	lspA; signal peptidase II [EC:3.4.23.36]
1652	K03106	6.24904	6.36205	5.87863	-0.605954	0.868632	-0.727829	0.221365	0.00260964	0.0173675	0.00537934	0.0280851	SRP54, ffh; signal recognition particle subunit SRP54 [EC:3.6.5.4]
1653	K03110	6.24989	6.36156	5.87887	-0.640578	0.85005	-0.74287	0.218571	0.00270386	0.0173976	0.0058819	0.0288575	ftsY; fused signal recognition particle receptor
1654	K03111	6.9064	7.04136	6.70625	-0.606915	0.904746	-0.674267	0.272208	0.00428406	0.0207011	0.0277643	0.0699427	ssb; single-strand DNA-binding protein
1655	K03112	-3.30163	-4.55737	-2.51772	2.29653	4.08376	0.480797	0.278206	0.0586781	0.116484	0.0296295	0.0721183	damX; DamX protein
1656	K03113	3.92864	4.37633	3.75257	-0.570502	1.33951	-0.400661	0.306484	0.0552134	0.114868	0.0546038	0.107902	EIF1, SUI1; translation initiation factor 1
1657	K03116	4.37646	4.74841	4.03527	-0.677992	1.20166	-0.531164	0.26164	0.0163282	0.0491143	0.0175978	0.0537817	tatA; sec-independent protein translocase protein TatA
1658	K03117	0.928003	1.39355	0.457525	-0.933131	2.73608	-0.386175	0.281063	0.110961	0.191474	0.036162	0.0818572	tatB; sec-independent protein translocase protein TatB
1659	K03118	4.36376	4.59613	3.89155	-0.640342	1.2361	-0.47569	0.285143	0.0285877	0.0730524	0.034137	0.0791182	tatC; sec-independent protein translocase protein TatC
1660	K03119	-3.29803	-4.60928	-2.51787	2.25764	4.17917	0.473481	0.275064	0.0571954	0.1146	0.0298328	0.0724716	tauD; taurine dioxygenase [EC:1.14.11.17]
1661	K03146	-1.06828	0.231511	-2.11874	-2.57522	4.79004	-0.686041	0.149386	0.00142873	0.0175032	0.000393208	0.0178038	THI4, THI1; cysteine-dependent adenosine diphosphate thiazole synthase [EC:2.4.2.60]
1662	K03147	5.77702	5.92486	5.26117	-0.751284	0.863657	-0.851252	0.176571	0.000414724	0.0173517	0.00119233	0.0206369	thiC; phosphomethylpyrimidine synthase [EC:4.1.99.17]
1663	K03148	2.61154	2.9611	2.16636	-0.744589	1.22366	-0.590869	0.2505	0.0162816	0.048996	0.0191083	0.0562656	thiF; sulfur carrier protein ThiS adenylyltransferase [EC:2.7.7.73]
1664	K03149	5.44326	5.75873	5.22734	-0.7051	0.911998	-0.761754	0.198857	0.00104002	0.0173525	0.00336485	0.0258414	thiG; thiazole synthase [EC:2.8.1.10]
1665	K03150	6.07371	6.4041	5.79183	-0.640028	0.879345	-0.739646	0.210226	0.00131557	0.0173525	0.00537399	0.0282791	thiH; 2-iminoacetate synthase [EC:4.1.99.19]
1666	K03151	5.55307	5.84366	5.17865	-0.580568	0.832423	-0.682949	0.222222	0.0143866	0.0450884	0.00720707	0.0315488	thiI; tRNA uracil 4-sulfurtransferase [EC:2.8.1.4]
1667	K03152	5.9943	6.16003	5.79268	-0.525209	0.898738	-0.574056	0.244286	0.0074188	0.0291144	0.0146245	0.0477646	thiJ; protein deglycase [EC:3.5.1.124]
1668	K03153	-9.02765	-9.0901	-8.96922	0.136766	4.94888	0.0289342	0.488	0.58509	0.669964	0.618493	0.697532	thiO; glycine oxidase [EC:1.4.3.19]
1669	K03154	5.66373	5.93194	5.24827	-0.785266	0.876914	-0.866216	0.184286	0.000407046	0.0173517	0.00159595	0.0223761	thiS; sulfur carrier protein
1670	K03168	6.2412	6.35666	5.87013	-0.61606	0.842847	-0.727456	0.213939	0.00227937	0.0173544	0.00464983	0.0273078	topA; DNA topoisomerase I [EC:5.99.1.2]
1671	K03169	7.2614	7.48986	6.89798	-0.606314	0.867953	-0.618485	0.252499	0.00462945	0.0215895	0.0157168	0.0499675	topB; DNA topoisomerase III [EC:5.99.1.2]
1672	K03177	6.25068	6.3641	5.87774	-0.644753	0.851415	-0.743941	0.217652	0.00260459	0.0173708	0.00529937	0.0279953	truB, PUS4, TRUB1; tRNA pseudouridine55 synthase [EC:5.4.99.25]
1673	K03179	0.559163	1.73563	-0.96794	-2.01427	3.06834	-0.616537	0.219366	0.0180073	0.0524062	0.00528905	0.0283053	ubiA; 4-hydroxybenzoate polyprenyltransferase [EC:2.5.1.39]
1674	K03181	-3.30201	-4.57609	-2.51827	2.22239	4.14702	0.466227	0.278	0.0592277	0.117231	0.0303388	0.0731941	ubiC; chorismate--pyruvate lyase [EC:4.1.3.40]
1675	K03182	2.13047	3.03774	1.52751	-1.28668	1.12936	-1.10474	0.105398	2.1e-05	0.0173517	4.92e-05	0.017775	ubiD; 4-hydroxy-3-polyprenylbenzoate decarboxylase [EC:4.1.1.98]
1676	K03183	4.47294	4.64405	4.17843	-0.436675	1.02922	-0.397433	0.33419	0.0242173	0.0648618	0.103639	0.176408	ubiE; demethylmenaquinone methyltransferase / 2-methoxy-6-polyprenyl-1,4-benzoquinol methylase [EC:2.1.1.163 2.1.1.201]
1677	K03184	-3.30617	-4.58075	-2.52394	2.27246	4.16543	0.481455	0.27078	0.060003	0.117973	0.0296885	0.0723287	ubiF; 2-octaprenyl-3-methyl-6-methoxy-1,4-benzoquinol hydroxylase [EC:1.14.13.-]
1678	K03185	-3.30096	-4.56319	-2.51595	2.23933	4.11783	0.469942	0.273714	0.0607369	0.119129	0.0299604	0.0726484	ubiH; 2-octaprenyl-6-methoxyphenol hydroxylase [EC:1.14.13.-]
1679	K03186	2.89983	3.53454	2.32313	-1.19968	0.861598	-1.31443	0.0794286	1.73e-06	0.00933766	1.05e-05	0.0177645	ubiX, bsdB, PAD1; flavin prenyltransferase [EC:2.5.1.129]
1680	K03187	1.32685	1.97108	1.08141	-1.00296	1.20963	-0.781612	0.210511	0.00154574	0.017353	0.00380104	0.0263224	ureE; urease accessory protein
1681	K03188	1.3331	1.96824	1.08434	-0.996023	1.17734	-0.784133	0.202857	0.0015591	0.0173525	0.00377175	0.0262946	ureF; urease accessory protein
1682	K03189	1.33508	1.96872	1.0827	-0.998015	1.18878	-0.783968	0.211083	0.00155267	0.0173527	0.0037867	0.0263172	ureG; urease accessory protein
1683	K03190	1.33298	1.96979	1.08145	-0.997143	1.18905	-0.799481	0.205714	0.00153352	0.017355	0.0037098	0.0261772	ureD, ureH; urease accessory protein
1684	K03191	1.20179	1.85981	0.968786	-1.00915	1.30661	-0.658244	0.1988	0.00786525	0.0301548	0.00263208	0.0246726	ureI; acid-activated urea channel
1685	K03192	-10.1989	-10.0698	-10.3214	-0.0718369	4.58904	-0.0130758	0.494	0.542056	0.624403	0.538075	0.619585	ureJ; urease accessory protein
1686	K03194	-9.66373	-9.5647	-9.73719	0.0499068	5.00776	0.00972449	0.495573	0.544913	0.633067	0.564591	0.646793	virB1; type IV secretion system protein VirB1
1687	K03195	-3.96987	-4.57872	-3.32496	1.16126	6.92521	0.161043	0.412168	0.454298	0.562112	0.402769	0.514655	virB10, lvhB10; type IV secretion system protein VirB10
1688	K03196	-3.97622	-4.55635	-3.32611	1.22012	7.0623	0.172055	0.412	0.463645	0.571422	0.423479	0.535167	virB11, lvhB11; type IV secretion system protein VirB11
1689	K03197	-10.0689	-9.85328	-10.2345	-0.244582	5.60114	-0.0381101	0.479714	0.583909	0.666368	0.563725	0.644061	virB2, lvhB2; type IV secretion system protein VirB2
1690	K03198	-9.96695	-9.8107	-10.1096	-0.313519	5.41001	-0.051414	0.471714	0.557798	0.644948	0.566161	0.646539	virB3, lvhB3; type IV secretion system protein VirB3
1691	K03199	-3.98143	-4.58472	-3.32544	1.00447	7.05243	0.143248	0.430163	0.490664	0.596525	0.488288	0.597879	virB4, lvhB4; type IV secretion system protein VirB4
1692	K03200	-3.97875	-4.53951	-3.31918	1.24027	6.8929	0.175035	0.40874	0.447909	0.555426	0.407224	0.518804	virB5, lvhB5; type IV secretion system protein VirB5
1693	K03201	-9.69346	-9.59749	-9.78289	-0.0425815	5.01578	-0.00780969	0.495858	0.561996	0.64606	0.578378	0.658545	virB6, lvhB6; type IV secretion system protein VirB6
1694	K03203	-4.02056	-4.5825	-3.33493	1.07812	7.56731	0.142473	0.434447	0.655018	0.73847	0.565967	0.666778	virB8, lvhB8; type IV secretion system protein VirB8
1695	K03204	-3.96435	-4.547	-3.33757	1.10474	6.99417	0.150552	0.413025	0.455035	0.562077	0.401888	0.513596	virB9, lvhB9; type IV secretion system protein VirB9
1696	K03205	7.29559	7.63292	6.8806	-0.525096	0.979526	-0.527876	0.270494	0.0720949	0.138794	0.0236289	0.0638029	virD4, lvhD4; type IV secretion system protein VirD4
1697	K03206	-10.2495	-10.15	-10.3132	0.0143183	4.6445	0.00308635	0.498571	0.533737	0.616156	0.550831	0.629163	azr; azobenzene reductase [EC:1.7.1.6]
1698	K03207	-4.07452	-4.81727	-2.79553	1.95165	4.25949	0.405733	0.321051	0.0935083	0.165028	0.0834529	0.1478	wcaH; colanic acid biosynthesis protein WcaH [EC:3.6.1.-]
1699	K03208	-3.78913	-4.85914	-2.55349	2.26734	4.31918	0.460418	0.298201	0.0682	0.13039	0.0491843	0.100203	wcaI; colanic acid biosynthesis glycosyl transferase WcaI
1700	K03210	6.20197	6.3457	5.79972	-0.674287	0.814472	-0.791468	0.192	0.00140741	0.0173527	0.00243626	0.0245261	yajC; preprotein translocase subunit YajC
1701	K03212	-2.13262	-2.96272	-0.762364	2.3284	2.50988	0.889137	0.156241	0.00113882	0.0174743	0.000533904	0.0181196	rumB; 23S rRNA (uracil747-C5)-methyltransferase [EC:2.1.1.189]
1702	K03214	-2.21488	-3.00693	-0.764615	2.3472	2.48562	0.899788	0.152286	0.00102694	0.0174267	0.000539032	0.0181658	yfiF, trmG; RNA methyltransferase, TrmH family [EC:2.1.1.-]
1703	K03215	6.77813	6.89743	6.50686	-0.572064	0.853523	-0.648581	0.238857	0.00707948	0.0282064	0.0120738	0.0423423	rumA; 23S rRNA (uracil1939-C5)-methyltransferase [EC:2.1.1.190]
1704	K03216	5.8031	6.05532	5.38305	-0.667053	0.801594	-0.750785	0.228571	0.00450757	0.0212812	0.00790458	0.033052	trmL, cspR; tRNA (cytidine/uridine-2'-O-)-methyltransferase [EC:2.1.1.207]
1705	K03217	6.30287	6.40149	5.89083	-0.575829	0.831148	-0.693061	0.238	0.00425838	0.0206374	0.010341	0.0384642	yidC, spoIIIJ, OXA1, ccfA; YidC/Oxa1 family membrane protein insertase
1706	K03218	6.16888	6.26172	5.74818	-0.593238	0.848441	-0.653292	0.24136	0.00586209	0.0249457	0.00978947	0.037243	rlmB; 23S rRNA (guanosine2251-2'-O)-methyltransferase [EC:2.1.1.185]
1707	K03219	-2.3635	-2.25439	-2.44243	-0.194373	3.29183	-0.0480947	0.459429	0.695747	0.775866	0.75384	0.824518	yscC, sctC, ssaC; type III secretion protein C
1708	K03220	-2.37313	-2.25373	-2.45733	-0.21053	3.3526	-0.05314	0.461011	0.684097	0.7648	0.717954	0.796479	yscD, sctD, ssaD; type III secretion protein D
1709	K03221	-4.54639	-4.91027	-3.15052	1.36818	4.71563	0.242463	0.386	0.320674	0.428439	0.270638	0.376264	yscF, sctF, ssaG, prgI; type III secretion protein F
1710	K03222	-2.37365	-2.27089	-2.45626	-0.198339	3.26225	-0.0482342	0.462439	0.687181	0.768044	0.741004	0.81442	yscJ, sctJ, hrcJ, ssaJ; type III secretion protein J
1711	K03223	-5.51872	-2.76007	-8.21691	-3.81816	6.50051	-0.554889	0.280491	0.0458994	0.091985	0.0416148	0.0886573	yscL, sctL; type III secretion protein L
1712	K03224	-2.36378	-2.26031	-2.44407	-0.186806	3.3126	-0.0431338	0.467009	0.700118	0.778588	0.750171	0.821549	yscN, sctN, hrcN, ssaN; ATP synthase in type III secretion protein N [EC:3.6.3.14]
1713	K03225	-2.37415	-2.27353	-2.45464	-0.209646	3.32312	-0.05353	0.461011	0.702087	0.779796	0.746642	0.818601	yscQ, sctQ, hrcQ, ssaQ, spaO; type III secretion protein Q
1714	K03226	-2.36423	-2.26305	-2.44564	-0.153271	3.32567	-0.0420762	0.467009	0.700356	0.778591	0.743064	0.815749	yscR, sctR, hrcR, ssaR; type III secretion protein R
1715	K03227	-2.36739	-2.2549	-2.44768	-0.188841	3.39083	-0.0404632	0.469866	0.699508	0.777842	0.746124	0.818825	yscS, sctS, hrcS, ssaS; type III secretion protein S
1716	K03228	-2.36874	-2.27055	-2.45087	-0.210714	3.28458	-0.0573413	0.456571	0.694829	0.77459	0.74428	0.817388	yscT, sctT, hrcT, ssaT; type III secretion protein T
1717	K03229	-2.35506	-2.25396	-2.44215	-0.168998	3.28783	-0.0428714	0.468286	0.695779	0.7753	0.748798	0.820477	yscU, sctU, hrcU, ssaU; type III secretion protein U
1718	K03230	-2.36472	-2.26105	-2.43342	-0.182924	3.31464	-0.0460406	0.467866	0.692838	0.772446	0.751968	0.822765	yscV, sctV, hrcV, ssaV, invA; type III secretion protein V
1719	K03269	4.11529	4.47582	3.9656	-0.498084	1.11781	-0.418245	0.299057	0.0248143	0.0660372	0.0602619	0.115928	lpxH; UDP-2,3-diacylglucosamine hydrolase [EC:3.6.1.54]
1720	K03270	4.3627	4.70932	4.0994	-0.628733	1.07577	-0.487568	0.260497	0.0111858	0.0381441	0.0239641	0.0641173	kdsC; 3-deoxy-D-manno-octulosonate 8-phosphate phosphatase (KDO 8-P phosphatase) [EC:3.1.3.45]
1721	K03271	3.11526	3.60108	2.91149	-0.717069	0.805294	-0.821806	0.159383	0.00194024	0.0173537	0.000703805	0.0183944	gmhA, lpcA; D-sedoheptulose 7-phosphate isomerase [EC:5.3.1.28]
1722	K03272	0.962798	1.38275	0.855589	-0.851923	1.58984	-0.507465	0.301429	0.0217593	0.0600121	0.0558501	0.109701	gmhC, hldE, waaE, rfaE; D-beta-D-heptose 7-phosphate kinase / D-beta-D-heptose 1-phosphate adenosyltransferase [EC:2.7.1.167 2.7.7.70]
1723	K03273	2.41924	2.96111	2.12586	-0.500259	1.05163	-0.48725	0.290488	0.0562726	0.116338	0.0439529	0.0928975	gmhB; D-glycero-D-manno-heptose 1,7-bisphosphate phosphatase [EC:3.1.3.82 3.1.3.83]
1724	K03274	0.736897	0.218436	0.836564	0.508393	1.41014	0.345235	0.360754	0.257986	0.370043	0.194219	0.291386	gmhD, rfaD; ADP-L-glycero-D-manno-heptose 6-epimerase [EC:5.1.3.20]
1725	K03275	-2.12869	-4.2012	-1.57171	1.76273	5.31995	0.275302	0.385429	0.245871	0.354908	0.279028	0.38756	waaO, rfaI; UDP-glucose:(glucosyl)LPS alpha-1,3-glucosyltransferase [EC:2.4.1.-]
1726	K03276	-1.93858	-4.20586	-1.43819	1.83185	5.60606	0.2689	0.386571	0.318501	0.432238	0.288758	0.398228	waaR, waaT, rfaJ; UDP-glucose/galactose:(glucosyl)LPS alpha-1,2-glucosyl/galactosyltransferase [EC:2.4.1.-]
1727	K03277	-10.301	-10.0789	-10.4561	-0.29554	4.59221	-0.0545203	0.469009	0.507704	0.593444	0.516184	0.597132	waaU, rfaK; heptosyltransferase IV [EC:2.4.-.-]
1728	K03278	-2.33991	-4.20358	-1.58213	1.53223	6.33806	0.204536	0.413025	0.536364	0.642274	0.446929	0.560492	waaI, rfaI; UDP-D-galactose:(glucosyl)LPS alpha-1,3-D-galactosyltransferase [EC:2.4.1.44]
1729	K03279	-2.07939	-4.21296	-1.39022	1.76946	5.34767	0.294111	0.38389	0.231493	0.338722	0.27223	0.380207	waaJ, rfaJ; UDP-glucose:(galactosyl)LPS alpha-1,2-glucosyltransferase [EC:2.4.1.58]
1730	K03281	4.15276	4.4455	3.96074	-0.460497	0.926732	-0.377579	0.304	0.0155125	0.0474394	0.0547823	0.108154	TC.CIC; chloride channel protein, CIC family
1731	K03282	5.99427	6.13831	5.70931	-0.587564	0.828275	-0.666683	0.228221	0.00425952	0.0206378	0.00791132	0.0330397	mscL; large conductance mechanosensitive channel
1732	K03284	6.47847	6.66939	6.13753	-0.600984	0.779016	-0.721711	0.216286	0.00192551	0.0173539	0.0052455	0.0282021	corA; magnesium transporter
1733	K03286	2.84533	3.85999	2.34045	-1.25163	1.55981	-0.749626	0.208286	0.00391649	0.019791	0.00423653	0.0268589	TC.OOP; OmpA-OmpF porin, OOP family
1734	K03287	-9.94681	-9.08696	-10.5293	-1.68918	5.24379	-0.294557	0.356184	0.259897	0.340788	0.269605	0.345117	TC.OMF; outer membrane factor, OMF family
1735	K03288	-8.1466	-8.98627	-6.98122	2.10692	5.3877	0.349523	0.345714	0.246046	0.330468	0.202048	0.283767	citA, tcuC; MFS transporter, MHS family, citrate/tricarballylate:H+ symporter
1736	K03289	-0.0534513	0.343184	-1.55488	-1.50149	4.35381	-0.255576	0.38589	0.608194	0.704401	0.293306	0.403314	nupG; MFS transporter, NHS family, nucleoside permease
1737	K03290	-3.5178	-4.85948	-2.51682	2.39009	3.75495	0.561825	0.256571	0.043975	0.0934334	0.0185816	0.0542953	nanT; MFS transporter, SHS family, sialic acid transporter
1738	K03291	-2.84588	-4.54128	-1.97747	2.47595	4.31087	0.520472	0.257355	0.0474342	0.0994823	0.0195183	0.056119	MFS.SET; MFS transporter, SET family, sugar efflux transporter
1739	K03292	6.21435	6.3337	5.84461	-0.637736	0.860004	-0.708957	0.223429	0.00416984	0.02041	0.00670677	0.0306045	TC.GPH; glycoside/pentoside/hexuronide:cation symporter, GPH family
1740	K03293	3.16379	3.64173	2.82514	-0.607673	2.08276	-0.248456	0.380748	0.332352	0.451677	0.278634	0.387667	TC.AAT; amino acid transporter, AAT family
1741	K03294	5.04339	5.10024	4.86353	-0.352854	0.936553	-0.377739	0.307143	0.0654564	0.129496	0.0616376	0.117901	TC.APA; basic amino acid/polyamine antiporter, APA family
1742	K03296	5.88887	6.14032	5.59294	-0.683377	1.09569	-0.592824	0.250286	0.00420721	0.0205079	0.014835	0.048369	TC.HAE1; hydrophobic/amphiphilic exporter-1 (mainly G- bacteria), HAE1 family
1743	K03297	-1.27116	-2.24638	-0.0667447	1.65982	3.4609	0.454111	0.328571	0.063072	0.126007	0.103557	0.175653	emrE, qac, mmr, smr; small multidrug resistance pump
1744	K03298	-1.75518	-1.74363	-1.77171	-0.0810158	6.68919	-0.0124676	0.491859	0.359872	0.472736	0.907874	0.938643	TC.DME; drug/metabolite transporter, DME family
1745	K03299	4.36945	4.5034	4.00836	-0.489009	0.867281	-0.513516	0.309714	0.084568	0.155879	0.0663223	0.124551	TC.GNTP; gluconate:H+ symporter, GntP family
1746	K03300	-1.91854	-2.61533	-1.56563	0.787504	3.28065	0.224296	0.389603	0.324728	0.442606	0.323866	0.435285	TC.CITMHS; citrate-Mg2+:H+ or citrate-Ca2+:H+ symporter, CitMHS family
1747	K03303	3.45923	4.25232	3.17342	-0.871498	1.16207	-0.740895	0.212571	0.00294168	0.0177692	0.00505841	0.0279122	lctP; lactate permease
1748	K03304	-2.20621	-2.97999	-0.765562	2.31733	2.48982	0.89917	0.156241	0.00114685	0.017508	0.00060445	0.0182752	tehA; tellurite resistance protein
1749	K03305	4.52669	4.71525	4.52654	-0.463433	1.10215	-0.381939	0.371894	0.125352	0.210574	0.251074	0.357351	TC.POT; proton-dependent oligopeptide transporter, POT family
1750	K03306	4.49942	4.92253	4.34334	-0.747137	0.970214	-0.772095	0.199943	0.00162542	0.0173533	0.00284169	0.0251886	TC.PIT; inorganic phosphate transporter, PiT family
1751	K03307	5.75529	6.1764	5.3742	-0.746934	0.883719	-0.802298	0.19166	0.000704798	0.0173517	0.00270881	0.0250208	TC.SSS; solute:Na+ symporter, SSS family
1752	K03308	7.00269	7.19081	6.72473	-0.686535	0.852202	-0.738631	0.223079	0.00299278	0.017652	0.00547731	0.0284338	TC.NSS; neurotransmitter:Na+ symporter, NSS family
1753	K03309	-0.0981721	-0.0485301	-0.18347	0.240024	2.6388	0.0465626	0.450157	0.287626	0.402577	0.681341	0.769883	TC.DAACS; dicarboxylate/amino acid:cation (Na+ or H+) symporter, DAACS family
1754	K03310	7.18895	7.48313	6.9911	-0.754202	0.869627	-0.815136	0.19	0.00201287	0.0173541	0.00210914	0.023932	TC.AGCS; alanine or glycine:cation symporter, AGCS family
1755	K03311	4.61591	4.75024	4.58041	-0.179772	1.19571	-0.132312	0.452	0.760631	0.832507	0.694659	0.78103	TC.LIVCS; branched-chain amino acid:cation transporter, LIVCS family
1756	K03312	3.73962	4.38448	3.51224	-0.42705	1.14349	-0.379847	0.346286	0.165103	0.260503	0.160149	0.249826	gltS; glutamate:Na+ symporter, ESS family
1757	K03313	4.55379	4.86514	4.34125	-0.62603	1.05116	-0.540468	0.236	0.00766426	0.0297801	0.0125106	0.0430889	nhaA; Na+:H+ antiporter, NhaA family
1758	K03314	-2.21154	-3.00216	-0.765232	2.36903	2.49872	0.914168	0.158857	0.00111006	0.0174526	0.000545206	0.0182147	nhaB; Na+:H+ antiporter, NhaB family
1759	K03315	4.91288	5.02067	4.62915	-0.363782	0.887892	-0.366645	0.349329	0.0922866	0.166403	0.159476	0.249076	nhaC; Na+:H+ antiporter, NhaC family
1760	K03316	3.14334	3.37389	3.08222	-0.43774	1.634	-0.250413	0.384571	0.174889	0.27259	0.279945	0.389049	TC.CPA1; monovalent cation:H+ antiporter, CPA1 family
1761	K03317	1.74497	1.98297	1.6808	-0.104141	1.60493	-0.0559484	0.475007	0.87243	0.914159	0.78399	0.850361	TC.CNT; concentrative nucleoside transporter, CNT family
1762	K03318	-9.4473	-10.0287	-8.77587	1.98953	5.38242	0.332597	0.35447	0.219934	0.296077	0.261617	0.34092	tutB; tyrosine permease
1763	K03319	1.51681	0.432394	1.73779	1.13359	1.49064	0.638131	0.222857	0.00740784	0.0290835	0.00730851	0.0324955	TC.DASS; divalent anion:Na+ symporter, DASS family
1764	K03320	6.09824	6.30057	5.9042	-0.657156	0.878282	-0.747802	0.171714	0.00113243	0.0173525	0.00107494	0.0200687	amt, AMT, MEP; ammonium transporter, Amt family
1765	K03321	4.99017	5.14182	4.66534	-0.464415	0.899937	-0.443347	0.288203	0.0214493	0.0594092	0.0419021	0.09001	TC.SULP; sulfate permease, SulP family
1766	K03322	4.55984	4.78033	4.4285	-0.528461	1.03351	-0.460409	0.312571	0.0285414	0.0729613	0.0625997	0.119265	mntH; manganese transport protein
1767	K03324	6.85243	7.0631	6.57117	-0.564726	0.910826	-0.647575	0.243714	0.00593864	0.0251576	0.0126812	0.0437328	yjbB; phosphate:Na+ symporter
1768	K03325	2.14521	2.8441	1.40738	-1.3565	1.04683	-1.19793	0.0819766	0.000361577	0.0173517	1.27e-05	0.017775	ACR3, arsB; arsenite transporter
1769	K03326	4.05742	4.13638	3.95427	-0.080466	1.10985	-0.0635231	0.463582	0.833027	0.886222	0.7691	0.839065	TC.DCUC, dcuC, dcuD; C4-dicarboxylate transporter, DcuC family
1770	K03327	5.24945	5.5728	5.0042	-0.605869	1.05929	-0.452788	0.272494	0.0112071	0.038189	0.0284886	0.0709436	TC.MATE, SLC47A, norM, mdtK, dinF; multidrug resistance protein, MATE family
1771	K03328	4.08462	4.21312	3.98025	-0.394442	1.5875	-0.237139	0.34533	0.601042	0.705967	0.13244	0.21441	TC.PST; polysaccharide transporter, PST family
1772	K03329	-4.21883	-4.91401	-2.78011	2.01679	4.56647	0.377784	0.329049	0.168003	0.257803	0.10236	0.173677	yahN; amino acid exporter
1773	K03332	4.36862	4.94151	4.04161	-0.758182	1.24181	-0.56213	0.237932	0.00730491	0.0288373	0.0101399	0.0381389	fruA; fructan beta-fructosidase [EC:3.2.1.80]
1774	K03335	2.16702	2.77126	1.87572	-0.886737	1.88121	-0.420846	0.340286	0.123044	0.207496	0.123224	0.202401	iolE; inosose dehydratase [EC:4.2.1.44]
1775	K03336	0.878051	1.51024	0.361854	-1.06668	1.94269	-0.502636	0.307143	0.0572637	0.117738	0.0715943	0.132011	iolD; 3D-(3,5/4)-trihydroxycyclohexane-1,2-dione acylhydrolase (decyclizing) [EC:3.7.1.22]
1776	K03337	1.68339	2.70956	0.886919	-1.25679	1.34114	-0.909162	0.176	0.000366271	0.0173517	0.00108477	0.0200665	iolB; 5-deoxy-glucuronate isomerase [EC:5.3.1.30]
1777	K03338	1.05966	1.92622	0.703937	-1.12002	1.84511	-0.550119	0.29	0.0450709	0.0996692	0.0449609	0.094323	iolC; 5-dehydro-2-deoxygluconokinase [EC:2.7.1.92]
1778	K03339	-9.93872	-10.0421	-9.8444	0.570709	4.80844	0.0979842	0.453143	0.53164	0.616402	0.555211	0.635352	iolJ; 6-phospho-5-dehydro-2-deoxy-D-gluconate aldolase [EC:4.1.2.29]
1779	K03340	5.3944	5.52346	5.03704	-0.676796	0.906082	-0.685751	0.225935	0.00186811	0.0173535	0.00755825	0.0323924	dapdh; diaminopimelate dehydrogenase [EC:1.4.1.16]
1780	K03342	-3.3268	-2.97949	-3.51304	-0.157885	2.90392	-0.0464747	0.48072	0.639415	0.731202	0.832484	0.883782	pabBC; para-aminobenzoate synthetase / 4-amino-4-deoxychorismate lyase [EC:2.6.1.85 4.1.3.38]
1781	K03346	1.69653	1.57202	2.12466	0.652909	1.92056	0.32031	0.347329	0.188175	0.288715	0.156233	0.244574	dnaB; replication initiation and membrane attachment protein
1782	K03366	-1.67559	-1.82818	-1.42536	0.627686	3.37096	0.173889	0.406	0.556947	0.659252	0.37773	0.490966	butA, budC; meso-butanediol dehydrogenase / (S,S)-butanediol dehydrogenase / diacetyl reductase [EC:1.1.1.- 1.1.1.76 1.1.1.304]
1783	K03367	1.55575	1.11427	1.69035	0.678148	1.8834	0.34877	0.347044	0.124981	0.209884	0.164328	0.25516	dltA; D-alanine--poly(phosphoribitol) ligase subunit 1 [EC:6.1.1.13]
1784	K03381	-9.49266	-9.56293	-9.44186	0.360743	5.31502	0.0598479	0.467714	0.548638	0.636606	0.600881	0.67782	catA; catechol 1,2-dioxygenase [EC:1.13.11.1]
1785	K03382	-6.75741	-7.57277	-6.05737	-0.160727	6.63746	-0.0255056	0.486432	0.704293	0.778536	0.765031	0.828485	atzB; hydroxydechloroatrazine ethylaminohydrolase [EC:3.5.4.43]
1786	K03383	-9.64413	-9.12944	-9.98613	-0.971536	4.83508	-0.178362	0.414857	0.460332	0.545757	0.448464	0.532426	atzD; cyanuric acid amidohydrolase [EC:3.5.2.15]
1787	K03385	2.12198	2.7702	2.03651	-0.776692	1.90669	-0.399885	0.298486	0.0872591	0.159587	0.0618858	0.118254	nrfA; nitrite reductase (cytochrome c-552) [EC:1.7.2.2]
1788	K03386	4.99625	5.1553	4.71065	-0.420218	0.985771	-0.409721	0.316	0.0444483	0.0989037	0.0711118	0.131333	PRDX2_4, ahpC; peroxiredoxin (alkyl hydroperoxide reductase subunit C) [EC:1.11.1.15]
1789	K03387	3.33993	4.2503	2.99042	-0.923205	1.56433	-0.589356	0.264286	0.0232696	0.0630382	0.0219015	0.060884	ahpF; alkyl hydroperoxide reductase subunit F [EC:1.6.4.-]
1790	K03388	2.06047	2.74184	1.63929	-1.08884	1.10427	-0.913597	0.173379	0.000802165	0.017352	0.00105549	0.0199284	hdrA2; heterodisulfide reductase subunit A2 [EC:1.8.7.3 1.8.98.4 1.8.98.5 1.8.98.6]
1791	K03389	1.8624	2.74044	1.4993	-1.20537	1.1675	-0.96079	0.158286	0.000475368	0.0173517	0.00063039	0.0181388	hdrB2; heterodisulfide reductase subunit B2 [EC:1.8.7.3 1.8.98.4 1.8.98.5 1.8.98.6]
1792	K03390	1.86245	2.74085	1.4556	-1.21524	1.23794	-0.957327	0.152857	0.000322211	0.0173517	0.000583146	0.0180844	hdrC2; heterodisulfide reductase subunit C2 [EC:1.8.7.3 1.8.98.4 1.8.98.5 1.8.98.6]
1793	K03394	4.61355	5.12439	4.03866	-1.06333	0.903638	-1.10763	0.122	4.5e-05	0.0173517	9.28e-05	0.017775	cobI-cbiL; precorrin-2/cobalt-factor-2 C20-methyltransferase [EC:2.1.1.130 2.1.1.151]
1794	K03399	0.968808	0.736686	1.05488	-0.00677938	1.88937	-0.00372588	0.498429	0.558271	0.668839	0.94054	0.961312	cbiE; cobalt-precorrin-7 (C5)-methyltransferase [EC:2.1.1.289]
1795	K03402	6.15949	6.33891	5.70881	-0.671782	0.781011	-0.80314	0.183429	0.00114548	0.0173525	0.00171041	0.0227573	argR, ahrC; transcriptional regulator of arginine metabolism
1796	K03404	-0.150849	0.0237778	-0.377091	-0.255626	1.2847	-0.179237	0.420571	0.77958	0.845318	0.468185	0.580045	chlD, bchD; magnesium chelatase subunit D [EC:6.6.1.1]
1797	K03405	-0.307277	-0.0024661	-0.523482	-0.464525	1.11591	-0.371786	0.339617	0.270332	0.383075	0.137738	0.220336	chlI, bchI; magnesium chelatase subunit I [EC:6.6.1.1]
1798	K03406	6.78061	6.88566	6.43506	-0.411297	0.930459	-0.419234	0.298201	0.0381926	0.0890713	0.0538569	0.106857	mcp; methyl-accepting chemotaxis protein
1799	K03407	3.84191	4.05357	3.5796	-0.539148	0.891887	-0.58855	0.255714	0.0115658	0.0389737	0.0161077	0.0507618	cheA; two-component system, chemotaxis family, sensor kinase CheA [EC:2.7.13.3]
1800	K03408	4.13042	4.40983	3.85339	-0.544748	1.08597	-0.467467	0.300771	0.0453444	0.100263	0.0480045	0.0985622	cheW; purine-binding chemotaxis protein CheW
1801	K03409	1.15268	1.74085	1.06948	-0.530055	1.24178	-0.353804	0.372286	0.26885	0.382456	0.227327	0.330308	cheX; chemotaxis protein CheX
1802	K03410	3.72078	3.94269	3.35278	-0.569786	0.94781	-0.522764	0.276207	0.0210998	0.0586917	0.0253489	0.0662644	cheC; chemotaxis protein CheC
1803	K03411	3.72211	3.94113	3.34823	-0.55807	0.968955	-0.535242	0.259143	0.0185207	0.0535551	0.0196389	0.0570697	cheD; chemotaxis protein CheD [EC:3.5.1.44]
1804	K03412	3.73574	3.9856	3.408	-0.548971	0.918844	-0.554249	0.248857	0.0151448	0.0466497	0.0153378	0.0492012	cheB; two-component system, chemotaxis family, protein-glutamate methylesterase/glutaminase [EC:3.1.1.61 3.5.1.44]
1805	K03413	4.51774	4.81593	4.16041	-0.539818	0.907472	-0.538538	0.260286	0.0174945	0.0514684	0.0189381	0.0556946	cheY; two-component system, chemotaxis family, chemotaxis protein CheY
1806	K03414	-1.94267	-2.03871	-1.83591	0.128788	2.87258	0.038633	0.469294	0.650824	0.742253	0.777122	0.841992	cheZ; chemotaxis protein CheZ
1807	K03415	2.90308	3.06434	2.83407	-0.291429	1.06682	-0.275188	0.368286	0.179954	0.278655	0.188982	0.285316	cheV; two-component system, chemotaxis family, chemotaxis protein CheV
1808	K03417	-3.80489	-4.25938	-2.82222	1.47559	3.90389	0.337684	0.350471	0.148945	0.235999	0.140241	0.223223	prpB; methylisocitrate lyase [EC:4.1.3.30]
1809	K03424	6.72512	6.91448	6.38557	-0.627294	0.847128	-0.731341	0.227935	0.0022713	0.0173544	0.00876028	0.0349697	tatD; TatD DNase family protein [EC:3.1.21.-]
1810	K03425	-3.32239	-4.58165	-2.52603	2.25062	4.14647	0.470271	0.279429	0.0594082	0.117973	0.0301661	0.0729879	tatE; sec-independent protein translocase protein TatE
1811	K03426	5.67056	5.90322	5.42374	-0.669261	0.887065	-0.715382	0.22	0.00149712	0.0173527	0.00601787	0.0292522	E3.6.1.22, NUDT12, nudC; NAD+ diphosphatase [EC:3.6.1.22]
1812	K03427	6.7312	6.8846	6.44982	-0.584986	0.896971	-0.577649	0.264496	0.0108907	0.0374609	0.0231756	0.062986	hsdM; type I restriction enzyme M protein [EC:2.1.1.72]
1813	K03429	2.7682	2.96562	2.69495	-0.543852	1.43545	-0.372139	0.33419	0.126447	0.211892	0.112417	0.188014	ugtP; processive 1,2-diacylglycerol beta-glucosyltransferase [EC:2.4.1.315]
1814	K03430	3.50428	3.78904	3.09832	-0.572065	1.50265	-0.366501	0.328478	0.0770195	0.145601	0.100252	0.171818	phnW; 2-aminoethylphosphonate-pyruvate transaminase [EC:2.6.1.37]
1815	K03431	5.80745	6.06511	5.39115	-0.649452	0.802163	-0.744216	0.229143	0.00497818	0.0225253	0.00869464	0.0347906	glmM; phosphoglucosamine mutase [EC:5.4.2.10]
1816	K03435	-2.96371	-4.56012	-1.95848	2.43269	4.23619	0.50924	0.25964	0.0492244	0.102281	0.0204907	0.0576795	fruR1, fruR; LacI family transcriptional regulator, fructose operon transcriptional repressor
1817	K03436	5.6292	5.81209	5.43919	-0.539304	0.867828	-0.620131	0.249714	0.0112436	0.0382499	0.0136817	0.0455991	fruR2, fruR; DeoR family transcriptional regulator, fructose operon transcriptional repressor
1818	K03437	6.24815	6.32657	5.94174	-0.579245	0.889685	-0.671376	0.226221	0.00448762	0.0212261	0.00898424	0.0353708	spoU; RNA methyltransferase, TrmH family
1819	K03438	6.5733	6.78727	6.28505	-0.669746	0.872591	-0.771763	0.200286	0.00160855	0.017353	0.00322304	0.0257011	mraW, rsmH; 16S rRNA (cytosine1402-N4)-methyltransferase [EC:2.1.1.199]
1820	K03439	6.24191	6.34989	5.87574	-0.594924	0.858192	-0.730637	0.216224	0.00262628	0.0173723	0.00521362	0.0278772	trmB, METTL1; tRNA (guanine-N7-)-methyltransferase [EC:2.1.1.33]
1821	K03442	6.04168	6.28774	5.84435	-0.577589	0.823611	-0.682269	0.220794	0.00360074	0.0189943	0.00572941	0.0287518	mscS; small conductance mechanosensitive channel
1822	K03444	2.40212	2.37395	2.40212	0.0325648	2.4467	0.010376	0.488	0.644981	0.742034	0.895285	0.931015	MFS.SP; MFS transporter, SP family, sugar porter, other
1823	K03445	-3.26513	-4.55921	-2.45029	2.19664	4.18211	0.454693	0.283429	0.0707278	0.133016	0.0369123	0.0827504	nepI; MFS transporter, DHA1 family, purine ribonucleoside efflux pump
1824	K03446	0.844463	1.15669	0.247236	-0.845941	2.28154	-0.361636	0.314286	0.142143	0.231646	0.0770703	0.139757	emrB; MFS transporter, DHA2 family, multidrug resistance protein
1825	K03449	1.88399	2.64081	0.666549	-1.11055	2.35855	-0.468805	0.3	0.0685568	0.133817	0.0509998	0.102813	MFS.CP; MFS transporter, CP family, cyanate transporter
1826	K03451	1.24078	1.42674	0.961215	-0.583149	1.51926	-0.359602	0.347143	0.138651	0.227414	0.152722	0.239801	TC.BCT; betaine/carnitine transporter, BCCT family
1827	K03453	5.59812	5.7163	5.43843	-0.756621	0.949829	-0.714396	0.189374	0.00190193	0.0173535	0.0024254	0.0244053	TC.BASS; bile acid:Na+ symporter, BASS family
1828	K03455	4.51301	4.71996	4.18227	-0.638879	1.19345	-0.501848	0.276286	0.0156961	0.0478249	0.0342493	0.0792788	TC.KEF; monovalent cation:H+ antiporter-2, CPA2 family
1829	K03457	1.32316	1.95975	0.961544	-0.871422	1.20477	-0.696721	0.221429	0.00447858	0.0212853	0.00664093	0.0307181	TC.NCS1; nucleobase:cation symporter-1, NCS1 family
1830	K03458	4.90199	5.12883	4.70506	-0.541597	0.944271	-0.524782	0.287714	0.0521674	0.110442	0.037653	0.0840602	TC.NCS2; nucleobase:cation symporter-2, NCS2 family
1831	K03462	-7.96591	-9.01305	-7.27289	1.58695	5.37117	0.267254	0.364	0.316967	0.410238	0.269234	0.360657	NAMPT; nicotinamide phosphoribosyltransferase [EC:2.4.2.12]
1832	K03464	-9.52703	-9.605	-9.46415	0.407367	5.35878	0.0641254	0.465867	0.5592	0.643495	0.601572	0.679079	catC; muconolactone D-isomerase [EC:5.3.3.4]
1833	K03465	3.72703	4.49083	3.5777	-0.56592	1.64694	-0.283133	0.344286	0.607104	0.711141	0.144549	0.230166	thyX, thy1; thymidylate synthase (FAD) [EC:2.1.1.148]
1834	K03466	6.50025	6.68769	6.1403	-0.597536	0.83254	-0.728552	0.230286	0.00182645	0.0173533	0.00743696	0.0320374	ftsK, spoIIIE; DNA segregation ATPase FtsK/SpoIIIE, S-DNA-T family
1835	K03468	-3.31002	-4.5855	-2.51757	2.25503	4.1753	0.479558	0.277429	0.0601931	0.119031	0.0307715	0.0738504	aaeB; p-hydroxybenzoic acid efflux pump subunit AaeB
1836	K03469	6.25075	6.38172	5.82141	-0.624224	0.852714	-0.759124	0.221143	0.00224112	0.0173544	0.00562856	0.0286666	rnhA, RNASEH1; ribonuclease HI [EC:3.1.26.4]
1837	K03470	6.24916	6.36073	5.8788	-0.614591	0.867449	-0.720435	0.211654	0.00246711	0.0173552	0.00451257	0.0271407	rnhB; ribonuclease HII [EC:3.1.26.4]
1838	K03471	2.05542	1.83005	2.12608	0.412917	1.82288	0.220606	0.384747	0.281134	0.396408	0.281827	0.390709	rnhC; ribonuclease HIII [EC:3.1.26.4]
1839	K03472	-3.31646	-4.56144	-2.50921	2.25273	4.27615	0.471583	0.276	0.0576368	0.115347	0.029537	0.0720225	epd; D-erythrose 4-phosphate dehydrogenase [EC:1.2.1.72]
1840	K03473	3.84734	4.3652	3.7373	-0.611277	1.37709	-0.407285	0.295915	0.0469782	0.102765	0.0487794	0.0996651	pdxB; erythronate-4-phosphate dehydrogenase [EC:1.1.1.290]
1841	K03474	3.85356	4.39081	3.77947	-0.600352	1.30183	-0.410754	0.296286	0.0421003	0.095232	0.0478004	0.0982623	pdxJ; pyridoxine 5-phosphate synthase [EC:2.6.99.2]
1842	K03475	3.29935	3.43464	2.96547	-0.595326	1.34119	-0.452407	0.304484	0.0567337	0.117096	0.0610296	0.117041	PTS-Ula-EIIC, ulaA, sgaT; PTS system, ascorbate-specific IIC component
1843	K03476	1.30167	1.58485	1.29175	-0.0098708	1.47863	-0.0072333	0.497001	0.931445	0.954505	0.947741	0.966137	ulaG; L-ascorbate 6-phosphate lactonase [EC:3.1.1.-]
1844	K03477	-2.2216	-2.99332	-0.759769	2.33691	2.47567	0.885327	0.158857	0.00108701	0.0174125	0.000555441	0.018216	ulaR; DeoR family transcriptional regulator, ulaG and ulaABCDEF operon transcriptional repressor
1845	K03478	1.49059	0.78873	2.07676	0.723707	1.72442	0.385602	0.365324	0.208417	0.312796	0.193711	0.291191	chbG; chitin disaccharide deacetylase [EC:3.5.1.105]
1846	K03480	3.16069	3.43242	2.66831	-0.775468	1.05641	-0.67446	0.240503	0.0116221	0.039099	0.0102232	0.0383301	glcT; transcriptional antiterminator
1847	K03481	0.175255	0.0503519	0.252956	0.533167	2.80883	0.173918	0.407883	0.407025	0.527544	0.404031	0.518338	glvR; RpiR family transcriptional regulator, glv operon transcriptional regulator
1848	K03482	-8.59198	-8.93055	-8.22503	1.1207	5.67438	0.172618	0.420857	0.482647	0.570759	0.492302	0.578387	yidP; GntR family transcriptional regulator, glv operon transcriptional regulator
1849	K03483	2.03945	2.69022	1.79604	-0.801605	1.57973	-0.472673	0.296857	0.0582452	0.11921	0.0527641	0.105323	mtlR; mannitol operon transcriptional antiterminator
1850	K03484	5.90564	6.03613	5.44694	-0.715272	0.872863	-0.772546	0.234571	0.0021385	0.0173544	0.0103663	0.038615	scrR; LacI family transcriptional regulator, sucrose operon repressor
1851	K03485	-3.31539	-4.56588	-2.52442	2.20828	4.17757	0.477897	0.271922	0.0599702	0.118551	0.0306204	0.0736373	treR; LacI family transcriptional regulator, trehalose operon repressor
1852	K03486	2.80597	3.19465	2.73176	-0.577493	0.984588	-0.578329	0.258498	0.0152699	0.0468831	0.0186731	0.0554083	treR2, treR; GntR family transcriptional regulator, trehalose operon transcriptional repressor
1853	K03487	1.33417	1.71794	1.04711	-0.671278	1.17289	-0.529695	0.302199	0.0152228	0.0467703	0.0565524	0.110711	ascG; LacI family transcriptional regulator, asc operon repressor
1854	K03488	5.6266	5.80159	5.5163	-0.49532	0.981327	-0.526298	0.284776	0.0219744	0.0604574	0.042985	0.091548	licT, bglG; beta-glucoside operon transcriptional antiterminator
1855	K03489	-2.02754	-1.79407	-2.04596	0.304858	5.31159	0.0574289	0.468571	0.489536	0.604342	0.773712	0.841921	yydK; GntR family transcriptional regulator, transcriptional regulator of bglA
1856	K03490	-2.82911	-3.59433	-2.26871	1.37089	3.74649	0.298685	0.318286	0.223645	0.324273	0.0815404	0.145606	chbR, celD; AraC family transcriptional regulator, dual regulator of chb operon
1857	K03491	4.46974	5.1083	4.28888	-0.700091	1.30514	-0.535168	0.299914	0.0205408	0.0576301	0.0505258	0.102103	licR; lichenan operon transcriptional antiterminator
1858	K03492	2.55716	2.54709	2.55716	-0.0591232	1.89053	-0.0244999	0.486432	0.969978	0.980204	0.926323	0.951894	ydhQ; GntR family transcriptional regulator
1859	K03493	-8.51853	-8.44523	-8.57961	0.0578635	5.55963	0.0104401	0.495143	0.63961	0.719823	0.695976	0.767349	bglG1; transcriptional antiterminator
1860	K03495	6.0555	6.20495	5.7943	-0.574305	0.827502	-0.649222	0.227429	0.00606475	0.0254922	0.00736495	0.0319529	gidA, mnmG, MTO1; tRNA uridine 5-carboxymethylaminomethyl modification enzyme
1861	K03496	7.67213	7.92769	7.51256	-0.672361	0.853143	-0.767074	0.196286	0.00123236	0.0173527	0.00249392	0.0246961	parA, soj; chromosome partitioning protein
1862	K03497	7.69184	7.95633	7.44532	-0.663475	0.876404	-0.725064	0.195087	0.00300085	0.0176559	0.00254146	0.0246948	parB, spo0J; chromosome partitioning protein, ParB family
1863	K03498	6.95091	7.14584	6.70301	-0.666866	0.852927	-0.746773	0.212571	0.00303439	0.0177216	0.00502149	0.0278248	trkH, trkG, ktrB; trk system potassium uptake protein
1864	K03499	7.27548	7.49573	7.0639	-0.614656	0.846275	-0.71211	0.231648	0.0036556	0.019126	0.00895868	0.0353999	trkA, ktrA; trk system potassium uptake protein
1865	K03500	5.64498	5.90635	5.34894	-0.599699	0.81138	-0.674082	0.227714	0.0184506	0.0533898	0.00720873	0.0316086	rsmB, sun; 16S rRNA (cytosine967-C5)-methyltransferase [EC:2.1.1.176]
1866	K03501	6.24275	6.35694	5.85718	-0.604364	0.866188	-0.712954	0.212796	0.00268034	0.0173918	0.00500689	0.027599	gidB, rsmG; 16S rRNA (guanine527-N7)-methyltransferase [EC:2.1.1.170]
1867	K03502	5.96063	6.0919	5.73638	-0.502109	0.841011	-0.603451	0.251429	0.011919	0.0397482	0.0155941	0.049754	umuC; DNA polymerase V
1868	K03503	1.04176	1.19212	0.994156	-0.252499	2.36889	-0.105933	0.445587	0.609364	0.712528	0.590962	0.693199	umuD; DNA polymerase V [EC:3.4.21.-]
1869	K03516	-3.76419	-4.85724	-2.54138	2.35749	4.31406	0.490333	0.29	0.0653374	0.125357	0.0472255	0.0974378	flhE; flagellar protein FlhE
1870	K03517	5.71776	5.9383	5.38807	-0.751737	0.90474	-0.825322	0.187714	0.000640169	0.0173517	0.00163337	0.0225213	nadA; quinolinate synthase [EC:2.5.1.72]
1871	K03518	5.36915	5.69089	5.08668	-0.758783	0.85864	-0.798262	0.210226	0.00312998	0.0179414	0.00387432	0.026416	coxS; aerobic carbon-monoxide dehydrogenase small subunit [EC:1.2.5.3]
1872	K03519	-1.45347	-1.27451	-1.98006	-0.188908	2.64479	-0.0494785	0.476	0.827653	0.879445	0.829522	0.883249	coxM, cutM; aerobic carbon-monoxide dehydrogenase medium subunit [EC:1.2.5.3]
1873	K03521	5.8042	6.09755	5.53996	-0.804943	0.962718	-0.813	0.163143	0.000383622	0.0173517	0.000676515	0.018384	fixA, etfB; electron transfer flavoprotein beta subunit
1874	K03522	5.79396	6.09124	5.5303	-0.832754	0.965352	-0.809267	0.171143	0.000415297	0.0173517	0.000809774	0.0188558	fixB, etfA; electron transfer flavoprotein alpha subunit
1875	K03523	5.83428	6.16254	5.43624	-0.73046	0.812499	-0.814725	0.199943	0.00176239	0.0173536	0.00275819	0.0251009	bioY; biotin transport system substrate-specific component
1876	K03524	6.29265	6.46112	5.89933	-0.655304	0.823865	-0.78781	0.206857	0.00152557	0.0173529	0.00431846	0.0269885	birA; BirA family transcriptional regulator, biotin operon repressor / biotin---[acetyl-CoA-carboxylase] ligase [EC:6.3.4.15]
1877	K03525	6.09408	6.36498	5.78499	-0.670983	0.890964	-0.739502	0.201085	0.00130892	0.0173527	0.00294362	0.0253507	coaX; type III pantothenate kinase [EC:2.7.1.33]
1878	K03526	6.11481	6.32765	5.86462	-0.672014	0.882267	-0.76605	0.189429	0.00162272	0.0173533	0.00226257	0.0243499	gcpE, ispG; (E)-4-hydroxy-3-methylbut-2-enyl-diphosphate synthase [EC:1.17.7.1 1.17.7.3]
1879	K03527	6.32759	6.46946	5.96739	-0.620715	0.895859	-0.702111	0.204286	0.00260024	0.0173657	0.00376657	0.0263214	ispH, lytB; 4-hydroxy-3-methylbut-2-en-1-yl diphosphate reductase [EC:1.17.7.4]
1880	K03528	-2.21086	-2.99804	-0.771415	2.36565	2.51449	0.90125	0.153385	0.00108175	0.0174195	0.000537743	0.0181209	zipA; cell division protein ZipA
1881	K03529	5.81739	6.04068	5.53146	-0.696467	0.869778	-0.760589	0.222	0.00327846	0.0182337	0.0051251	0.0279699	smc; chromosome segregation protein
1882	K03530	6.96185	7.18632	6.74029	-0.599349	0.921827	-0.635896	0.253927	0.00348453	0.01871	0.0151628	0.0488261	hupB; DNA-binding protein HU-beta
1883	K03531	6.23681	6.40557	5.98366	-0.690101	0.854537	-0.748515	0.197714	0.00237004	0.0173546	0.00271568	0.025089	ftsZ; cell division protein FtsZ
1884	K03532	-4.18633	-4.9156	-2.18515	2.29922	4.65391	0.404155	0.310483	0.128719	0.209605	0.071829	0.131915	torC; trimethylamine-N-oxide reductase (cytochrome c), cytochrome c-type subunit TorC
1885	K03533	-2.188	-2.74995	-1.95387	0.552862	2.02284	0.253052	0.399714	0.331103	0.447333	0.352058	0.463376	torD; TorA specific chaperone
1886	K03534	4.30961	4.52588	3.86302	-0.630739	1.42739	-0.433042	0.324193	0.076281	0.144614	0.09561	0.165511	rhaM; L-rhamnose mutarotase [EC:5.1.3.32]
1887	K03535	-2.70496	-4.43001	-1.75656	2.33825	4.39621	0.464466	0.290571	0.0745303	0.139876	0.0470487	0.0972625	gudP; MFS transporter, ACS family, glucarate transporter
1888	K03536	6.20533	6.35069	5.86979	-0.637513	0.848953	-0.746961	0.199657	0.00205949	0.0173541	0.00292815	0.025367	rnpA; ribonuclease P protein component [EC:3.1.26.5]
1889	K03537	-10.3303	-10.0603	-10.5369	-0.386996	4.64566	-0.0734472	0.461582	0.526811	0.611096	0.509425	0.589577	POP5; ribonuclease P/MRP protein subunit POP5 [EC:3.1.26.5]
1890	K03543	3.7139	3.74568	3.66239	0.0401564	1.55935	0.0227787	0.491574	0.463582	0.582183	0.953366	0.970089	emrA; membrane fusion protein, multidrug efflux system
1891	K03544	6.6796	6.79065	6.15173	-0.684261	0.837086	-0.811134	0.202286	0.000918132	0.0173525	0.00273553	0.0250157	clpX, CLPX; ATP-dependent Clp protease ATP-binding subunit ClpX
1892	K03545	6.841	6.99213	6.52291	-0.637997	0.873933	-0.704534	0.238789	0.00488792	0.0222766	0.0111867	0.0404218	tig; trigger factor
1893	K03546	5.91276	6.09343	5.69244	-0.605451	0.91176	-0.678572	0.232571	0.00416644	0.0204047	0.00992928	0.0375617	sbcC, rad50; DNA repair protein SbcC/Rad50
1894	K03547	5.84027	5.98998	5.67816	-0.546061	0.842048	-0.641008	0.252286	0.00647847	0.0266136	0.0162049	0.0509905	sbcD, mre11; DNA repair protein SbcD/Mre11
1895	K03548	-2.21025	-2.98809	-0.767808	2.31996	2.4648	0.89562	0.154286	0.00109613	0.0174671	0.00055989	0.0181498	perM; putative permease
1896	K03549	3.25508	3.55373	3.10833	-0.537819	1.19137	-0.46759	0.298486	0.04259	0.0959779	0.0634628	0.120478	kup; KUP system potassium uptake protein
1897	K03550	6.24941	6.36187	5.87597	-0.638222	0.866506	-0.730846	0.214	0.00249251	0.0173565	0.00477544	0.0273666	ruvA; holliday junction DNA helicase RuvA [EC:3.6.4.12]
1898	K03551	6.24913	6.36099	5.87884	-0.655462	0.863705	-0.732609	0.222508	0.00268598	0.0173855	0.00575507	0.0286416	ruvB; holliday junction DNA helicase RuvB [EC:3.6.4.12]
1899	K03553	6.25137	6.36511	5.90362	-0.598978	0.853591	-0.710277	0.217081	0.00266794	0.0173847	0.00551591	0.0282865	recA; recombination protein RecA
1900	K03554	-2.21632	-3.00046	-0.760693	2.33152	2.50449	0.881594	0.158812	0.00106967	0.0174098	0.000557397	0.0181909	rdgC; recombination associated protein RdgC
1901	K03555	6.10512	6.25289	5.86674	-0.580914	0.834479	-0.676913	0.219366	0.00470069	0.0217803	0.00581733	0.0290531	mutS; DNA mismatch repair protein MutS
1902	K03556	0.509875	0.311061	0.580198	0.287585	2.09946	0.143576	0.434162	0.347971	0.467544	0.518442	0.629001	malT; LuxR family transcriptional regulator, maltose regulon positive regulatory protein
1903	K03557	-2.17274	-3.00525	-0.758203	2.27135	2.34318	0.877202	0.160286	0.00130522	0.0174937	0.000623558	0.018383	fis; Fis family transcriptional regulator, factor for inversion stimulation protein
1904	K03558	4.21395	4.64124	3.84286	-0.568392	1.47468	-0.378496	0.313053	0.0847086	0.156111	0.0643364	0.121734	cvpA; membrane protein required for colicin V production
1905	K03559	4.49501	4.80903	4.10166	-0.651319	1.27975	-0.497861	0.242571	0.0195175	0.0555627	0.0128001	0.0439794	exbD; biopolymer transport protein ExbD
1906	K03560	0.474243	0.522082	0.44066	0.171147	1.13817	0.142423	0.413596	0.338114	0.456619	0.443954	0.556429	tolR; biopolymer transport protein TolR
1907	K03561	5.64078	6.01739	5.32444	-0.709508	1.21283	-0.513356	0.25507	0.00989536	0.0352856	0.0185155	0.0553152	exbB; biopolymer transport protein ExbB
1908	K03562	0.256536	0.0798523	0.429598	0.447691	1.08311	0.353483	0.332191	0.11438	0.195564	0.103504	0.17556	tolQ; biopolymer transport protein TolQ
1909	K03563	3.81548	4.31905	3.70891	-0.573833	0.900057	-0.591615	0.239075	0.0156627	0.0477211	0.0102312	0.038336	csrA; carbon storage regulator
1910	K03564	5.17675	5.27771	4.79802	-0.541951	0.866946	-0.580499	0.266495	0.00577757	0.0247153	0.0212726	0.0597624	BCP, PRXQ, DOT5; peroxiredoxin Q/BCP [EC:1.11.1.15]
1911	K03565	6.2004	6.32658	5.78594	-0.652183	0.836198	-0.781353	0.193373	0.0014847	0.017353	0.00269665	0.0249561	recX; regulatory protein
1912	K03566	-2.01428	-2.86488	-0.593219	2.43985	2.52824	0.932028	0.167095	0.00085921	0.0174117	0.000631602	0.0183744	gcvA; LysR family transcriptional regulator, glycine cleavage system transcriptional activator
1913	K03567	-0.994439	-1.20265	-0.151554	0.433164	2.18418	0.192908	0.414739	0.352412	0.471478	0.396275	0.509851	gcvR; glycine cleavage system transcriptional repressor
1914	K03568	2.52384	2.53966	2.52211	-0.0783655	1.38356	-0.0515084	0.474436	0.483374	0.600715	0.789376	0.854256	tldD; TldD protein
1915	K03569	6.76444	6.93432	6.51917	-0.645886	0.908142	-0.664571	0.222508	0.00703468	0.0280949	0.00675065	0.0305831	mreB; rod shape-determining protein MreB and related proteins
1916	K03570	6.05994	6.21575	5.81865	-0.602738	0.861067	-0.67362	0.224571	0.00548094	0.0238965	0.00697326	0.0312034	mreC; rod shape-determining protein MreC
1917	K03571	5.3123	5.41188	5.07593	-0.543741	0.818017	-0.621819	0.274857	0.0212601	0.0590129	0.0250603	0.0658549	mreD; rod shape-determining protein MreD
1918	K03572	6.10173	6.2483	5.86023	-0.56972	0.85106	-0.668114	0.223143	0.00435256	0.0208783	0.00560722	0.0287228	mutL; DNA mismatch repair protein MutL
1919	K03573	-2.22058	-3.00449	-0.756918	2.32514	2.51666	0.890635	0.150571	0.00107761	0.0174834	0.000553348	0.0181859	mutH; DNA mismatch repair protein MutH
1920	K03574	6.71927	6.97684	6.39696	-0.657584	0.818733	-0.759665	0.223365	0.00357306	0.0189198	0.00728412	0.0317712	mutT, NUDT15, MTH2; 8-oxo-dGTP diphosphatase [EC:3.6.1.55]
1921	K03575	5.82239	6.07324	5.51662	-0.64546	0.838002	-0.721482	0.21651	0.00220132	0.0173544	0.00513481	0.0279637	mutY; A/G-specific adenine glycosylase [EC:3.2.2.31]
1922	K03576	-2.21234	-2.99043	-0.760455	2.31676	2.48481	0.879588	0.154527	0.00110986	0.0175173	0.000545578	0.0181758	metR; LysR family transcriptional regulator, regulator for metE and metH
1923	K03577	-2.55665	-3.29026	-2.02119	1.27329	2.26295	0.466027	0.277714	0.17631	0.261885	0.0325085	0.076325	acrR, smeT; TetR/AcrR family transcriptional regulator, acrAB operon repressor
1924	K03578	2.94398	3.27121	2.57606	-0.655753	1.49261	-0.370504	0.324479	0.0443892	0.0987853	0.0994055	0.17069	hrpA; ATP-dependent helicase HrpA [EC:3.6.4.13]
1925	K03579	-1.85421	-1.86759	-1.84019	-0.182538	2.43441	-0.0601257	0.47615	0.860176	0.903817	0.845346	0.894235	hrpB; ATP-dependent helicase HrpB [EC:3.6.4.13]
1926	K03580	-1.96332	-2.94116	-0.768619	2.19311	2.59998	0.794011	0.182234	0.00268271	0.0185224	0.00179159	0.0223941	hepA; ATP-dependent helicase HepA [EC:3.6.4.-]
1927	K03581	5.87178	6.13484	5.59368	-0.525494	0.842058	-0.581123	0.259354	0.0487358	0.105399	0.0166473	0.0519391	recD; exodeoxyribonuclease V alpha subunit [EC:3.1.11.5]
1928	K03582	-0.97802	-1.28977	-0.623243	0.646991	1.95265	0.275343	0.361714	0.226145	0.332992	0.189051	0.284863	recB; exodeoxyribonuclease V beta subunit [EC:3.1.11.5]
1929	K03583	-2.21866	-3.0054	-0.760218	2.37439	2.46893	0.917439	0.158	0.00100886	0.0174322	0.000557071	0.0182171	recC; exodeoxyribonuclease V gamma subunit [EC:3.1.11.5]
1930	K03584	6.23138	6.34281	5.84512	-0.622872	0.872544	-0.728541	0.211429	0.00244254	0.0173547	0.00404279	0.0267084	recO; DNA repair protein RecO (recombination protein O)
1931	K03585	6.08575	6.60373	5.95866	-0.562739	1.35904	-0.384234	0.341045	0.0674575	0.132322	0.133345	0.21567	acrA, mexA, adeI, smeD, mtrC, cmeA; membrane fusion protein, multidrug efflux system
1932	K03586	-0.481508	-1.9238	0.232289	1.95344	2.27431	0.755838	0.178857	0.00449767	0.0218482	0.00180177	0.0223262	ftsL; cell division protein FtsL
1933	K03587	4.77795	4.90627	4.51863	-0.616225	0.958871	-0.630761	0.231714	0.00296777	0.0177075	0.00934172	0.0362264	ftsI; cell division protein FtsI (penicillin-binding protein 3) [EC:3.4.16.4]
1934	K03588	6.60296	6.75881	6.40438	-0.558643	0.899827	-0.613698	0.253642	0.00854181	0.0320425	0.0144345	0.0474154	ftsW, spoVE; cell division protein FtsW
1935	K03589	6.07548	6.23434	5.73712	-0.633472	0.848218	-0.728764	0.228857	0.00218613	0.0173544	0.00728753	0.0316989	ftsQ; cell division protein FtsQ
1936	K03590	4.43545	4.54133	4.41769	-0.34791	0.894979	-0.368554	0.345044	0.0585067	0.119579	0.13718	0.220373	ftsA; cell division protein FtsA
1937	K03591	-2.21439	-3.00547	-0.771511	2.34466	2.50916	0.894581	0.152528	0.00103798	0.0174078	0.000542767	0.0182039	ftsN; cell division protein FtsN
1938	K03592	2.50291	2.5209	2.49962	-0.0975759	1.37769	-0.0745915	0.470723	0.450852	0.569963	0.762714	0.834112	pmbA; PmbA protein
1939	K03593	4.56988	4.78297	4.41882	-0.557367	0.991031	-0.521839	0.263143	0.0075766	0.0295382	0.0200661	0.0578687	mrp, NUBPL; ATP-binding protein involved in chromosome partitioning
1940	K03594	3.1183	3.68356	2.88994	-0.885924	0.982671	-0.938732	0.127143	0.000345722	0.0173517	0.000127288	0.017775	bfr; bacterioferritin [EC:1.16.3.1]
1941	K03595	6.24921	6.35587	5.8776	-0.602673	0.870864	-0.714249	0.21	0.00255455	0.0173603	0.00499934	0.027653	era, ERAL1; GTPase
1942	K03596	6.24988	6.36212	5.87848	-0.621442	0.849289	-0.72554	0.218223	0.00276639	0.01743	0.00608608	0.0291978	lepA; GTP-binding protein LepA
1943	K03597	-2.2108	-2.99351	-0.765655	2.3282	2.53667	0.89619	0.156286	0.00111898	0.017483	0.000569102	0.0182517	rseA; sigma-E factor negative regulatory protein RseA
1944	K03598	-2.206	-2.99616	-0.765079	2.32964	2.48738	0.909996	0.158286	0.00106953	0.0174348	0.000555777	0.0182646	rseB; sigma-E factor negative regulatory protein RseB
1945	K03599	0.186856	-0.424228	0.41392	0.801701	1.29165	0.584686	0.254857	0.0128152	0.0415245	0.0153481	0.048755	sspA, mglA; stringent starvation protein A
1946	K03600	0.187583	-0.434494	0.410297	0.800625	1.26449	0.614098	0.249929	0.0125065	0.0408577	0.0152208	0.0485129	sspB; stringent starvation protein B
1947	K03601	6.22781	6.35865	5.87617	-0.657439	0.859743	-0.763729	0.197372	0.00212935	0.0173544	0.00315363	0.0256864	xseA; exodeoxyribonuclease VII large subunit [EC:3.1.11.6]
1948	K03602	6.24003	6.34783	5.86412	-0.613281	0.867902	-0.709815	0.21651	0.00264485	0.0173768	0.00524413	0.0278759	xseB; exodeoxyribonuclease VII small subunit [EC:3.1.11.6]
1949	K03603	-2.21332	-3.00767	-0.77003	2.36936	2.51672	0.895215	0.156812	0.00110619	0.0174434	0.000531679	0.0181337	fadR; GntR family transcriptional regulator, negative regulator for fad regulon and positive regulator of fabA
1950	K03604	3.34522	3.93008	3.12073	-0.647767	0.854396	-0.710639	0.219937	0.00601902	0.0253656	0.00509009	0.0279614	purR; LacI family transcriptional regulator, purine nucleotide synthesis repressor
1951	K03605	1.47131	1.66485	1.37626	-0.619087	1.09621	-0.430667	0.289714	0.0602466	0.122037	0.0422182	0.0904421	hyaD, hybD; hydrogenase maturation protease [EC:3.4.23.-]
1952	K03606	4.51181	4.97599	4.10753	-0.740918	1.41793	-0.49746	0.281063	0.0370477	0.0872482	0.0302127	0.0735095	wcaJ; putative colanic acid biosysnthesis UDP-glucose lipid carrier transferase
1953	K03607	-1.48853	-2.84649	-0.42304	2.30915	2.42637	0.853204	0.177664	0.00209687	0.017984	0.00136471	0.020973	proQ; ProP effector
1954	K03608	4.79471	4.98049	4.36306	-0.764352	0.868433	-0.814245	0.192231	0.00114257	0.0173525	0.00222101	0.0242167	minE; cell division topological specificity factor
1955	K03609	5.405	5.8377	5.08774	-0.703018	0.881042	-0.702985	0.208226	0.0105618	0.0367514	0.0043671	0.0269672	minD; septum site-determining protein MinD
1956	K03610	4.85611	4.99728	4.3789	-0.749901	0.933809	-0.777468	0.184804	0.0010828	0.0173525	0.00177001	0.02279	minC; septum site-determining protein MinC
1957	K03611	0.315457	-0.351261	0.771402	0.900392	1.30768	0.637047	0.255927	0.0193754	0.055232	0.017053	0.0522035	dsbB; disulfide bond formation protein DsbB
1958	K03612	5.69511	5.96702	5.32903	-0.660985	0.859425	-0.757938	0.189089	0.000860628	0.0173525	0.00171456	0.0226658	rnfG; electron transport complex protein RnfG
1959	K03613	6.1022	6.31716	5.84292	-0.584465	0.88265	-0.618196	0.240503	0.0083324	0.0315153	0.0110686	0.0401448	rnfE; electron transport complex protein RnfE
1960	K03614	6.10776	6.37936	5.84541	-0.550922	0.882404	-0.609988	0.236571	0.00919761	0.0336626	0.00936261	0.0363228	rnfD; electron transport complex protein RnfD
1961	K03615	6.38152	6.58758	6.03541	-0.654219	0.861965	-0.733855	0.224222	0.00243652	0.0173562	0.00616026	0.0295617	rnfC; electron transport complex protein RnfC
1962	K03616	1.41656	1.0046	1.53962	0.609837	1.41164	0.431476	0.304571	0.115931	0.198049	0.0561036	0.110069	rnfB; electron transport complex protein RnfB
1963	K03617	6.09623	6.30749	5.84324	-0.577592	0.874057	-0.630168	0.238286	0.00867364	0.0323831	0.0116222	0.0413765	rnfA; electron transport complex protein RnfA
1964	K03618	-1.66255	-2.08329	-0.442846	1.71616	3.27297	0.452019	0.296	0.0394165	0.0903967	0.0484682	0.0992788	hyaF; hydrogenase-1 operon protein HyaF
1965	K03619	-0.308637	-0.505526	-0.138164	0.191703	1.76544	0.102925	0.450443	0.789956	0.853508	0.612485	0.711443	hyaE; hydrogenase-1 operon protein HyaE
1966	K03620	1.19834	1.35048	0.787424	-0.691263	1.25652	-0.473736	0.266495	0.0483026	0.104651	0.0251274	0.065914	hyaC; Ni/Fe-hydrogenase 1 B-type cytochrome subunit
1967	K03621	5.63716	5.93185	5.25323	-0.671251	0.824565	-0.76109	0.211143	0.00766628	0.029766	0.00400463	0.0265813	plsX; glycerol-3-phosphate acyltransferase PlsX [EC:2.3.1.15]
1968	K03623	-2.31306	-3.85333	-1.71573	2.2416	4.14085	0.458947	0.240286	0.0530148	0.108318	0.0110078	0.04006	yhcO; ribonuclease inhibitor
1969	K03624	6.67781	6.8144	6.30384	-0.674386	0.852585	-0.735771	0.229649	0.00312344	0.017886	0.00910259	0.0356861	greA; transcription elongation factor GreA
1970	K03625	6.24781	6.35755	5.87726	-0.608808	0.851516	-0.722692	0.216795	0.00258889	0.0173676	0.00498226	0.0276262	nusB; N utilization substance protein B
1971	K03628	5.83571	5.94184	5.49669	-0.653151	0.849469	-0.715475	0.220571	0.00145937	0.017353	0.00594657	0.0293671	rho; transcription termination factor Rho
1972	K03629	6.26684	6.41094	5.94002	-0.641042	0.847914	-0.771016	0.189946	0.00158146	0.017353	0.00226971	0.0243143	recF; DNA replication and repair protein RecF
1973	K03630	6.24186	6.41854	5.99552	-0.647051	0.891286	-0.708784	0.21651	0.00315292	0.0179488	0.00617674	0.0295924	radC; DNA repair protein RadC
1974	K03631	6.24928	6.36046	5.87726	-0.607546	0.858553	-0.731156	0.214	0.00261383	0.0173686	0.00541827	0.0281305	recN; DNA repair protein RecN (Recombination protein N)
1975	K03632	-2.21385	-2.9999	-0.771874	2.34338	2.49544	0.898287	0.155099	0.00107908	0.017433	0.000563791	0.0182708	mukB; chromosome partition protein MukB
1976	K03633	-2.21088	-2.99195	-0.767414	2.34106	2.48185	0.911755	0.151957	0.00105259	0.0174317	0.00052925	0.0181511	mukF; chromosome partition protein MukF
1977	K03634	0.250878	0.0734836	0.428761	0.501471	1.04945	0.393547	0.303714	0.0785387	0.14741	0.0720236	0.132411	lolA; outer membrane lipoprotein carrier protein
1978	K03635	0.271052	-0.439944	0.491889	1.01159	1.26695	0.734054	0.214857	0.00355509	0.0194822	0.00448295	0.0274318	MOCS2B, moaE; molybdopterin synthase catalytic subunit [EC:2.8.1.12]
1979	K03636	0.273426	-0.431383	0.492953	0.992023	1.26069	0.727716	0.21651	0.00397776	0.020399	0.00605589	0.0301319	moaD, cysO; sulfur-carrier protein
1980	K03637	5.17357	5.33181	4.98415	-0.731625	0.925292	-0.694591	0.235361	0.00817922	0.0311066	0.00869953	0.0348002	moaC, CNX3; cyclic pyranopterin monophosphate synthase [EC:4.6.1.17]
1981	K03638	-1.61715	-2.44243	-1.20546	1.07147	2.95128	0.353693	0.341331	0.218569	0.323795	0.138422	0.22178	moaB; molybdopterin adenylyltransferase [EC:2.7.7.75]
1982	K03639	5.2624	5.47604	5.03409	-0.809479	0.940327	-0.804531	0.191374	0.00183001	0.0173536	0.00213231	0.0239677	moaA, CNX2; GTP 3',8-cyclase [EC:4.1.99.22]
1983	K03640	1.02397	1.15318	0.908204	-0.38876	1.00567	-0.304707	0.341714	0.244428	0.3545	0.129893	0.210574	pal; peptidoglycan-associated lipoprotein
1984	K03641	0.251177	0.0725683	0.428136	0.480486	1.04607	0.386942	0.310571	0.0789024	0.147826	0.0712743	0.131339	tolB; TolB protein
1985	K03642	1.29336	1.87774	0.980387	-0.781435	1.36727	-0.592458	0.257143	0.0314036	0.0777942	0.020878	0.0592358	rlpA; rare lipoprotein A
1986	K03643	0.191224	-0.430737	0.416692	0.800861	1.27675	0.600634	0.251357	0.0125124	0.0408423	0.015143	0.0483567	lptE, rlpB; LPS-assembly lipoprotein
1987	K03644	4.00688	4.45993	3.89824	-0.526226	1.31071	-0.378051	0.312857	0.0639678	0.127394	0.0803394	0.144359	lipA; lipoyl synthase [EC:2.8.1.8]
1988	K03645	-2.20983	-2.99428	-0.769747	2.3479	2.48689	0.894459	0.151957	0.00110012	0.0174629	0.000546804	0.018201	seqA; negative modulator of initiation of replication
1989	K03646	2.72872	3.10488	2.3935	-1.0085	1.6927	-0.534342	0.281714	0.0185108	0.0535484	0.0292855	0.0722284	tolA; colicin import membrane protein
1990	K03647	2.67208	2.53304	2.70604	0.0964496	1.49313	0.064545	0.467581	0.678649	0.769048	0.727931	0.807088	nrdI; protein involved in ribonucleotide reduction
1991	K03648	5.91254	6.21269	5.56058	-0.603042	0.825777	-0.704764	0.254	0.00269198	0.0174065	0.0171974	0.0527127	UNG, UDG; uracil-DNA glycosylase [EC:3.2.2.27]
1992	K03649	-2.21967	-2.62889	-1.83031	1.07433	2.40961	0.370321	0.300771	0.324466	0.428083	0.0680492	0.126768	mug; double-stranded uracil-DNA glycosylase [EC:3.2.2.28]
1993	K03650	6.056	6.2033	5.79387	-0.587817	0.819888	-0.657373	0.214225	0.00540593	0.0236943	0.00570324	0.0289153	mnmE, trmE, MSS1; tRNA modification GTPase [EC:3.6.-.-]
1994	K03651	-2.21791	-3.00139	-0.764408	2.37599	2.49788	0.904046	0.1491	0.00105289	0.017408	0.000533866	0.0181518	cpdA; 3',5'-cyclic-AMP phosphodiesterase [EC:3.1.4.53]
1995	K03652	1.59648	2.35459	1.34005	-0.422332	2.60747	-0.158163	0.407883	0.905506	0.937028	0.391409	0.505835	MPG; DNA-3-methyladenine glycosylase [EC:3.2.2.21]
1996	K03653	-10.009	-9.06794	-10.6121	-1.75017	5.29164	-0.296035	0.352571	0.252193	0.330994	0.258684	0.332546	K03653; N-glycosylase/DNA lyase [EC:3.2.2.- 4.2.99.18]
1997	K03654	6.84307	6.98456	6.63251	-0.632134	0.920472	-0.640544	0.249429	0.00276178	0.0174216	0.0157885	0.0499279	recQ; ATP-dependent DNA helicase RecQ [EC:3.6.4.12]
1998	K03655	7.54401	7.79449	7.29925	-0.607974	0.91023	-0.692667	0.238286	0.00279354	0.0174364	0.00933773	0.0362966	recG; ATP-dependent DNA helicase RecG [EC:3.6.4.12]
[truncated: 3,434 more rows]

## Sheet: CD vs. HC
ANOVA-like differential expression (ALDEx2) compositional analysis between the CD and HC groups.
	KO	rab.all	rab.win.CD	rab.win.HC	diff.btw	diff.win	effect	overlap	we.ep	we.eBH	wi.ep	wi.eBH	description
1	K00001	4.47679	3.89765	4.88161	0.811493	1.51101	0.477062	0.266495	0.005769	0.0127908	0.020157	0.0362011	E1.1.1.1, adh; alcohol dehydrogenase [EC:1.1.1.1]
2	K00002	-7.42637	-4.18343	-8.10098	-1.49287	7.6513	-0.195521	0.401714	0.446808	0.509435	0.375995	0.446568	AKR1A1, adh; alcohol dehydrogenase (NADP+) [EC:1.1.1.2]
3	K00003	5.84841	5.27059	6.33338	1.13822	1.16684	0.881277	0.165096	9.08e-05	0.000900931	0.000574984	0.0034566	E1.1.1.3; homoserine dehydrogenase [EC:1.1.1.3]
4	K00004	-2.1305	-2.35605	-1.98491	0.454428	2.10747	0.194402	0.415429	0.229075	0.294383	0.39151	0.473251	BDH, butB; (R,R)-butanediol dehydrogenase / meso-butanediol dehydrogenase / diacetyl reductase [EC:1.1.1.4 1.1.1.- 1.1.1.303]
5	K00005	4.84996	4.48315	5.37461	0.826846	0.914671	0.832944	0.188803	0.000794825	0.003024	0.0012621	0.00395551	gldA; glycerol dehydrogenase [EC:1.1.1.6]
6	K00007	-9.71812	-9.88152	-9.49003	0.0403796	5.98997	0.00762241	0.496857	0.576389	0.629083	0.598734	0.656447	dalD; D-arabinitol 4-dehydrogenase [EC:1.1.1.11]
7	K00008	5.61188	4.98762	5.92445	1.02818	1.08926	0.801982	0.189089	0.00041369	0.00193355	0.00128176	0.00399408	SORD, gutB; L-iditol 2-dehydrogenase [EC:1.1.1.14]
8	K00009	3.86169	3.78332	4.06907	0.720793	1.65081	0.418094	0.322286	0.0577687	0.0888542	0.0915583	0.136215	mtlD; mannitol-1-phosphate 5-dehydrogenase [EC:1.1.1.17]
9	K00010	3.11474	2.95493	3.80408	0.604306	1.8727	0.22947	0.377035	0.136027	0.187919	0.207713	0.276959	iolG; myo-inositol 2-dehydrogenase / D-chiro-inositol 1-dehydrogenase [EC:1.1.1.18 1.1.1.369]
10	K00012	5.8588	5.49799	6.38924	0.908698	1.1119	0.806217	0.179377	0.000324331	0.00166499	0.000678	0.00347538	UGDH, ugd; UDPglucose 6-dehydrogenase [EC:1.1.1.22]
11	K00013	5.95315	5.49349	6.31071	1.04043	1.03784	0.906044	0.180857	6.14e-05	0.000827245	0.000820463	0.0034895	hisD; histidinol dehydrogenase [EC:1.1.1.23]
12	K00014	6.5479	6.03497	6.82306	0.995271	1.08765	0.879877	0.177143	9.98e-05	0.000931152	0.000837098	0.00351019	aroE; shikimate dehydrogenase [EC:1.1.1.25]
13	K00015	-2.27301	-1.80635	-3.20743	-1.42206	4.51109	-0.274845	0.331334	0.222484	0.284068	0.0937758	0.138728	gyaR, GOR1; glyoxylate reductase [EC:1.1.1.26]
14	K00016	5.89098	5.30756	6.41908	1.06242	1.03842	0.979606	0.155955	2.76e-05	0.000827224	0.000288003	0.00289063	LDH, ldh; L-lactate dehydrogenase [EC:1.1.1.27]
15	K00018	5.3355	4.69536	5.84621	1.03338	1.09834	0.841815	0.170857	0.000184447	0.00121243	0.000555803	0.00344525	hprA; glycerate dehydrogenase [EC:1.1.1.29]
16	K00019	-8.08292	-6.06514	-9.01248	-2.67951	6.06045	-0.393519	0.338286	0.135774	0.177101	0.137438	0.186032	E1.1.1.30, bdh; 3-hydroxybutyrate dehydrogenase [EC:1.1.1.30]
17	K00020	4.16873	3.8986	4.49353	0.801209	1.18273	0.579982	0.249429	0.0124683	0.023709	0.0100141	0.0194463	mmsB, HIBADH; 3-hydroxyisobutyrate dehydrogenase [EC:1.1.1.31]
18	K00023	-10.4751	-10.8202	-9.97615	0.583592	4.70087	0.109008	0.444571	0.466599	0.5204	0.466629	0.52474	phbB; acetoacetyl-CoA reductase [EC:1.1.1.36]
19	K00024	4.88539	4.62999	5.3461	0.727919	1.38866	0.480669	0.277143	0.0113117	0.021894	0.0273243	0.0473546	mdh; malate dehydrogenase [EC:1.1.1.37]
20	K00027	5.22215	4.54996	5.78759	1.16535	1.14113	0.867945	0.210857	0.00038115	0.00183863	0.00282589	0.0066748	ME2, sfcA, maeA; malate dehydrogenase (oxaloacetate-decarboxylating) [EC:1.1.1.38]
21	K00029	4.20049	3.87092	4.56336	0.642452	1.14541	0.505408	0.265638	0.00772746	0.016023	0.0164301	0.0301343	E1.1.1.40, maeB; malate dehydrogenase (oxaloacetate-decarboxylating)(NADP+) [EC:1.1.1.40]
22	K00030	2.03051	1.68784	2.44673	0.696659	1.97267	0.310639	0.37475	0.107042	0.152325	0.190596	0.257189	IDH3; isocitrate dehydrogenase (NAD+) [EC:1.1.1.41]
23	K00031	5.82673	5.32372	6.13722	1.02097	1.14714	0.859182	0.193659	6.36e-05	0.000827533	0.00121583	0.00388075	IDH1, IDH2, icd; isocitrate dehydrogenase [EC:1.1.1.42]
24	K00033	4.48865	4.13149	5.07969	0.83789	1.11105	0.788814	0.190571	0.00101339	0.00361061	0.00112357	0.00378786	PGD, gnd, gntZ; 6-phosphogluconate dehydrogenase [EC:1.1.1.44 1.1.1.343]
25	K00034	-1.48188	-1.53116	-1.44219	-0.155644	2.58615	-0.0516632	0.469429	0.85826	0.887521	0.80221	0.846352	gdh; glucose 1-dehydrogenase [EC:1.1.1.47]
26	K00036	4.34148	3.99708	4.63564	0.842636	1.11345	0.751108	0.208797	0.00148787	0.00476785	0.00291903	0.00685124	G6PD, zwf; glucose-6-phosphate 1-dehydrogenase [EC:1.1.1.49 1.1.1.363]
27	K00039	-9.86617	-10.0932	-9.52942	0.0656777	6.1017	0.0110126	0.493714	0.582687	0.636374	0.610177	0.667452	rbtD; ribitol 2-dehydrogenase [EC:1.1.1.56]
28	K00040	3.781	3.48379	4.03556	0.61662	0.785453	0.784852	0.182805	0.000336496	0.00169732	0.00114968	0.00388013	uxuB; fructuronate reductase [EC:1.1.1.57]
29	K00041	4.35468	4.01308	4.94004	0.86175	1.05444	0.757001	0.195087	0.00114573	0.00395006	0.00205618	0.00528642	uxaB; tagaturonate reductase [EC:1.1.1.58]
30	K00042	4.30231	4.21444	4.43711	0.370977	0.955954	0.381941	0.34533	0.141383	0.194271	0.117344	0.168932	garR, glxR; 2-hydroxy-3-oxopropionate reductase [EC:1.1.1.60]
31	K00045	-0.895563	-2.05205	-0.510963	0.898221	4.59018	0.136666	0.452857	0.0266863	0.0450375	0.639913	0.710447	E1.1.1.67, mtlK; mannitol 2-dehydrogenase [EC:1.1.1.67]
32	K00046	4.87948	4.49059	5.36649	0.95006	1.03699	0.887352	0.169951	8.77e-05	0.000889883	0.000570053	0.00344536	idnO; gluconate 5-dehydrogenase [EC:1.1.1.69]
33	K00048	5.66424	5.27287	5.98094	0.997534	1.18421	0.787802	0.217143	0.000232772	0.00136322	0.00282892	0.00667878	fucO; lactaldehyde reductase [EC:1.1.1.77]
34	K00050	2.82052	1.62998	3.51641	1.49168	3.54779	0.383431	0.281919	0.00488084	0.011228	0.0292799	0.0503399	ttuD; hydroxypyruvate reductase [EC:1.1.1.81]
35	K00052	5.97531	5.51514	6.31649	1.08638	1.05612	0.890024	0.180234	6.99e-05	0.0008324	0.000803692	0.00348403	leuB, IMDH; 3-isopropylmalate dehydrogenase [EC:1.1.1.85]
36	K00053	6.14768	5.68318	6.45638	1.13124	1.13053	0.903631	0.178857	4.52e-05	0.000827224	0.00082618	0.00351175	ilvC; ketol-acid reductoisomerase [EC:1.1.1.86]
37	K00054	-0.961369	-1.34923	-0.228408	1.09689	2.27257	0.452824	0.302771	0.0408324	0.0653488	0.0473914	0.0764961	mvaA; hydroxymethylglutaryl-CoA reductase [EC:1.1.1.88]
38	K00055	-4.53427	-3.93363	-4.85892	0.577522	5.57782	0.0873427	0.469294	0.354383	0.422355	0.757839	0.80948	E1.1.1.90; aryl-alcohol dehydrogenase [EC:1.1.1.90]
39	K00057	5.98193	5.5095	6.42915	1.10552	1.04779	0.95557	0.177429	3.32e-05	0.000827224	0.000652712	0.00346485	gpsA; glycerol-3-phosphate dehydrogenase (NAD(P)+) [EC:1.1.1.94]
40	K00058	6.38437	5.9029	6.94662	1.10935	0.955092	0.96201	0.17395	4.92e-05	0.000827224	0.000589017	0.00345901	serA, PHGDH; D-3-phosphoglycerate dehydrogenase / 2-oxoglutarate reductase [EC:1.1.1.95 1.1.1.399]
41	K00059	7.28691	6.96155	7.73036	1.06798	1.17148	0.826117	0.190231	0.000178376	0.00119321	0.00150682	0.00432897	fabG; 3-oxoacyl-[acyl-carrier protein] reductase [EC:1.1.1.100]
42	K00060	1.95629	2.07376	1.86972	-0.139892	0.946766	-0.139719	0.426286	0.558499	0.62974	0.44278	0.524912	tdh; threonine 3-dehydrogenase [EC:1.1.1.103]
43	K00065	2.00463	1.94147	2.09732	0.0236599	1.68651	0.0143539	0.495001	0.696013	0.753408	0.957983	0.968626	kduD; 2-dehydro-3-deoxy-D-gluconate 5-dehydrogenase [EC:1.1.1.127]
44	K00066	-8.6497	-9.56255	-6.9709	2.14606	9.62584	0.221929	0.389714	0.300844	0.363819	0.277673	0.343398	algD; GDP-mannose 6-dehydrogenase [EC:1.1.1.132]
45	K00067	6.10999	5.81897	6.56325	0.875522	1.23188	0.629186	0.202228	0.00110182	0.00384698	0.00174227	0.0047331	rfbD, rmlD; dTDP-4-dehydrorhamnose reductase [EC:1.1.1.133]
46	K00068	3.28849	3.17557	3.56515	0.67232	1.63888	0.365589	0.37018	0.202444	0.265268	0.204585	0.27334	srlD; sorbitol-6-phosphate 2-dehydrogenase [EC:1.1.1.140]
47	K00073	-1.46471	-0.451405	-3.52859	-3.16855	3.94595	-0.763876	0.142571	0.00298218	0.0074505	0.000140144	0.00218571	allD; ureidoglycolate dehydrogenase (NAD+) [EC:1.1.1.350]
48	K00074	4.07934	3.48704	4.85552	1.46254	1.62897	0.818319	0.193088	0.000396266	0.00188386	0.00161282	0.004504	paaH, hbd, fadB, mmgB; 3-hydroxybutyryl-CoA dehydrogenase [EC:1.1.1.157]
49	K00075	5.99818	5.57919	6.44046	1.06182	1.03134	0.927053	0.182571	5.23e-05	0.000827224	0.000688816	0.00347756	murB; UDP-N-acetylmuramate dehydrogenase [EC:1.3.1.98]
50	K00076	3.11909	2.94751	3.32016	0.46874	0.924735	0.478909	0.288203	0.0128836	0.0243464	0.0282551	0.0487397	hdhA; 7-alpha-hydroxysteroid dehydrogenase [EC:1.1.1.159]
51	K00077	5.50916	5.19518	5.94232	0.923583	0.992473	0.865289	0.169666	0.000161557	0.00113128	0.000530497	0.00344289	panE, apbA; 2-dehydropantoate 2-reductase [EC:1.1.1.169]
52	K00078	-7.44964	-4.17317	-8.15305	-1.49349	7.72835	-0.198289	0.404	0.440742	0.503853	0.361006	0.432691	DHDH; dihydrodiol dehydrogenase / D-xylose 1-dehydrogenase (NADP) [EC:1.3.1.20 1.1.1.179]
53	K00082	-8.06734	-10.214	-2.31335	6.98026	6.79631	0.844717	0.217652	0.00348785	0.00731258	0.00640468	0.0129597	ribD2; 5-amino-6-(5-phosphoribosylamino)uracil reductase [EC:1.1.1.193]
54	K00086	-4.76562	-5.1727	-4.55102	-0.0885754	6.61073	-0.0108063	0.49443	0.773923	0.814994	0.882705	0.90973	dhaT; 1,3-propanediol dehydrogenase [EC:1.1.1.202]
55	K00087	2.97517	2.93031	3.02885	0.0465489	0.865756	0.0484347	0.479292	0.736313	0.787769	0.804451	0.848961	ygeS, xdhA; xanthine dehydrogenase molybdenum-binding subunit [EC:1.17.1.4]
56	K00088	6.1487	5.76107	6.53552	1.06237	1.02759	0.917422	0.167381	3.84e-05	0.000827224	0.000631581	0.00347309	IMPDH, guaB; IMP dehydrogenase [EC:1.1.1.205]
57	K00090	-1.54865	-0.627067	-4.52633	-4.16816	4.56803	-0.820908	0.160857	0.00440636	0.009748	0.000335536	0.00296354	ghrB; glyoxylate/hydroxypyruvate/2-ketogluconate reductase [EC:1.1.1.79 1.1.1.81 1.1.1.215]
58	K00091	-2.12769	-2.37946	-1.89575	0.260326	2.9369	0.0703318	0.466153	0.281603	0.351342	0.71496	0.77331	E1.1.1.219; dihydroflavonol-4-reductase [EC:1.1.1.219]
59	K00094	-1.36928	-1.11703	-4.1055	-2.65319	6.24071	-0.383529	0.342571	0.156853	0.210675	0.115059	0.16585	E1.1.1.251, gatD; galactitol-1-phosphate 5-dehydrogenase [EC:1.1.1.251]
60	K00096	3.2058	2.74389	3.7603	0.953031	1.35793	0.627973	0.236857	0.00227608	0.00646103	0.00526721	0.0111551	araM, egsA; glycerol-1-phosphate dehydrogenase [NAD(P)+] [EC:1.1.1.261]
61	K00097	4.47382	4.40124	4.61749	0.569124	0.836077	0.65065	0.262286	0.00355111	0.00891068	0.0195668	0.0351796	pdxA; 4-hydroxythreonine-4-phosphate dehydrogenase [EC:1.1.1.262]
62	K00098	-2.38659	-1.13759	-4.8206	-3.83589	4.72174	-0.722952	0.195373	0.00862131	0.0168975	0.00252464	0.00617813	idnD; L-idonate 5-dehydrogenase [EC:1.1.1.264]
63	K00099	5.97659	5.51883	6.32208	1.091	1.06051	0.901961	0.175378	6.54e-05	0.000827931	0.000785687	0.00347928	dxr; 1-deoxy-D-xylulose-5-phosphate reductoisomerase [EC:1.1.1.267]
64	K00100	5.96256	5.45556	6.27462	0.986799	0.991428	0.855686	0.171665	0.000165292	0.001145	0.000573019	0.00345831	bdhAB; butanol dehydrogenase [EC:1.1.1.-]
65	K00101	-2.05986	-0.621133	-4.51277	-3.93596	4.76922	-0.737098	0.196286	0.00795919	0.0157237	0.00126807	0.00407538	lldD; L-lactate dehydrogenase (cytochrome) [EC:1.1.2.3]
66	K00102	-0.902531	-1.74074	0.689087	2.53529	8.90502	0.41059	0.188571	0.0291515	0.0470218	0.00128315	0.0041944	LDHD, dld; D-lactate dehydrogenase (cytochrome) [EC:1.1.2.4]
67	K00104	3.41959	3.15726	4.20606	1.01892	1.60639	0.585012	0.268571	0.010393	0.0204226	0.0218554	0.038879	glcD; glycolate oxidase [EC:1.1.3.15]
68	K00105	-3.90836	-4.01986	-3.71425	0.624066	5.03705	0.113213	0.436	0.346134	0.41422	0.528776	0.607087	E1.1.3.21; alpha-glycerophosphate oxidase [EC:1.1.3.21]
69	K00108	-1.94815	-1.0625	-4.6342	-4.10886	4.55411	-0.825209	0.150571	0.00486968	0.0104905	0.000309966	0.00290693	betA, CHDH; choline dehydrogenase [EC:1.1.99.1]
70	K00111	5.02211	4.58803	5.42409	0.904145	0.858344	0.886161	0.198286	0.00072829	0.00284476	0.00228343	0.00569144	glpA, glpD; glycerol-3-phosphate dehydrogenase [EC:1.1.5.3]
71	K00112	0.20513	0.596118	-0.426902	-1.04596	1.95821	-0.498423	0.276492	0.0160731	0.0292409	0.0294058	0.0502305	glpB; glycerol-3-phosphate dehydrogenase subunit B [EC:1.1.5.3]
72	K00113	0.20835	0.593803	-0.460432	-1.02901	1.94186	-0.501986	0.286204	0.0161392	0.0293403	0.0290575	0.0497418	glpC; glycerol-3-phosphate dehydrogenase subunit C [EC:1.1.5.3]
73	K00114	-10.5618	-10.9178	-9.95706	0.85853	4.43053	0.168348	0.417714	0.401442	0.453004	0.403819	0.460052	exaA; alcohol dehydrogenase (cytochrome c) [EC:1.1.2.8]
74	K00116	-2.05626	-0.61889	-4.51828	-3.83475	4.2578	-0.776766	0.186857	0.00752454	0.014911	0.0013377	0.00417879	mqo; malate dehydrogenase (quinone) [EC:1.1.5.4]
75	K00117	-2.19472	-1.01154	-4.50509	-3.86426	4.71213	-0.704218	0.184286	0.00862191	0.0167267	0.00133563	0.00418491	gcd; quinoprotein glucose dehydrogenase [EC:1.1.5.2]
76	K00121	-1.25068	-0.142846	-3.23065	-2.77396	3.31318	-0.734954	0.186571	0.0164888	0.0289621	0.00123209	0.00395203	frmA, ADH5, adhC; S-(hydroxymethyl)glutathione dehydrogenase / alcohol dehydrogenase [EC:1.1.1.284 1.1.1.1]
77	K00123	3.09098	3.16676	2.87689	-0.362665	0.724345	-0.419343	0.292773	0.025664	0.043539	0.0405024	0.0668	fdoG, fdhF, fdwA; formate dehydrogenase major subunit [EC:1.17.1.9]
78	K00124	0.848149	1.11315	0.569239	-0.589777	1.14968	-0.478495	0.286	0.0178909	0.0319612	0.0333192	0.0561338	fdoH, fdsB; formate dehydrogenase iron-sulfur subunit
79	K00127	1.25534	1.40661	0.595419	-0.863571	1.3859	-0.599423	0.259143	0.0097985	0.0194002	0.0134312	0.0251668	fdoI, fdsG; formate dehydrogenase subunit gamma
80	K00128	4.87603	4.27419	5.428	1.20616	1.378	0.751835	0.214286	0.000596768	0.00247614	0.00321784	0.00739513	ALDH; aldehyde dehydrogenase (NAD+) [EC:1.2.1.3]
81	K00129	-9.81664	-10.0302	-9.55358	0.0200505	5.90439	0.0032654	0.498715	0.569302	0.623698	0.586153	0.644313	E1.2.1.5; aldehyde dehydrogenase (NAD(P)+) [EC:1.2.1.5]
82	K00130	-1.54425	-0.641893	-4.02033	-3.50994	3.91493	-0.801333	0.160571	0.00917103	0.0171874	0.000457786	0.00325509	betB, gbsA; betaine-aldehyde dehydrogenase [EC:1.2.1.8]
83	K00131	-1.03832	-1.68899	-0.432237	1.13789	2.36246	0.435159	0.312768	0.0287721	0.0480684	0.0601144	0.09436	gapN; glyceraldehyde-3-phosphate dehydrogenase (NADP+) [EC:1.2.1.9]
84	K00132	-6.32277	-6.29981	-6.39314	0.277405	6.28184	0.0379139	0.48	0.707443	0.755584	0.778997	0.823564	E1.2.1.10; acetaldehyde dehydrogenase (acetylating) [EC:1.2.1.10]
85	K00133	5.98322	5.53414	6.3763	1.07977	1.05641	0.916377	0.174857	5.74e-05	0.000827224	0.000797771	0.00347856	asd; aspartate-semialdehyde dehydrogenase [EC:1.2.1.11]
86	K00134	6.02059	5.61931	6.44771	1.04918	0.985451	0.927352	0.180571	5.77e-05	0.000827245	0.000843771	0.0034974	GAPDH, gapA; glyceraldehyde 3-phosphate dehydrogenase [EC:1.2.1.12]
87	K00135	0.0351393	0.366314	-1.25576	-1.13096	2.47372	-0.437286	0.33	0.128198	0.178289	0.0945679	0.140065	gabD; succinate-semialdehyde dehydrogenase / glutarate-semialdehyde dehydrogenase [EC:1.2.1.16 1.2.1.79 1.2.1.20]
88	K00137	-2.06901	-0.627478	-4.53654	-3.88205	4.74419	-0.73988	0.197714	0.00752554	0.0149472	0.00121433	0.00402457	prr; aminobutyraldehyde dehydrogenase [EC:1.2.1.19]
89	K00138	-2.07456	-0.619148	-4.51334	-3.89518	4.64013	-0.754533	0.186804	0.00721356	0.0144909	0.00124212	0.00407254	aldB; aldehyde dehydrogenase [EC:1.2.1.-]
90	K00140	-2.80775	-2.61521	-3.3853	-0.74455	3.12015	-0.202931	0.397143	0.696166	0.748875	0.312908	0.391663	mmsA, iolA, ALDH6A1; malonate-semialdehyde dehydrogenase (acetylating) / methylmalonate-semialdehyde dehydrogenase [EC:1.2.1.18 1.2.1.27]
91	K00141	-10.4431	-10.7626	-9.89095	0.716735	4.59465	0.134676	0.432857	0.448145	0.499767	0.443339	0.501385	xylC; benzaldehyde dehydrogenase (NAD) [EC:1.2.1.28]
92	K00145	5.85712	5.4251	6.153	0.991575	0.998519	0.954966	0.160526	2.64e-05	0.000827224	0.000314785	0.00297282	argC; N-acetyl-gamma-glutamyl-phosphate reductase [EC:1.2.1.38]
93	K00146	-9.51242	-9.52601	-9.48075	-0.496012	6.54736	-0.0706375	0.461868	0.47383	0.5304	0.572252	0.630047	feaB; phenylacetaldehyde dehydrogenase [EC:1.2.1.39]
94	K00147	5.92745	5.49363	6.27322	1.09403	1.07527	0.888996	0.180857	5.74e-05	0.000827224	0.000842955	0.00349633	proA; glutamate-5-semialdehyde dehydrogenase [EC:1.2.1.41]
95	K00148	-10.6025	-10.9613	-10.0274	0.754784	4.39251	0.151142	0.423879	0.41005	0.458759	0.424778	0.478254	fdhA; glutathione-independent formaldehyde dehydrogenase [EC:1.2.1.46]
96	K00151	-9.15504	-9.24265	-9.0316	-0.389019	6.0348	-0.0615696	0.469429	0.542999	0.598229	0.639765	0.695185	hpaE, hpcC; 5-carboxymethyl-2-hydroxymuconic-semialdehyde dehydrogenase [EC:1.2.1.60]
97	K00153	-10.036	-10.5471	-9.14562	1.39838	4.83096	0.253296	0.377714	0.323017	0.369531	0.314913	0.367055	E1.1.1.306; S-(hydroxymethyl)mycothiol dehydrogenase [EC:1.1.1.306]
98	K00154	-10.6087	-10.9825	-9.97553	0.865511	4.44292	0.166992	0.418	0.409639	0.46153	0.40422	0.460859	E1.2.1.68; coniferyl-aldehyde dehydrogenase [EC:1.2.1.68]
99	K00156	1.68743	2.19417	1.21342	-0.924025	1.35251	-0.604223	0.252	0.0211199	0.0368194	0.0127087	0.0239785	poxB; pyruvate dehydrogenase (quinone) [EC:1.2.5.1]
100	K00158	-3.32816	-3.61551	-2.96267	0.785393	4.7918	0.138277	0.414286	0.486892	0.55299	0.409546	0.49111	E1.2.3.3, poxL; pyruvate oxidase [EC:1.2.3.3]
101	K00161	0.650074	0.553159	0.847989	0.621826	1.75053	0.303044	0.369429	0.0920696	0.133455	0.199775	0.267599	PDHA, pdhA; pyruvate dehydrogenase E1 component alpha subunit [EC:1.2.4.1]
102	K00162	0.647771	0.554042	0.846043	0.580592	1.74165	0.298088	0.372	0.0920239	0.13341	0.199115	0.26685	PDHB, pdhB; pyruvate dehydrogenase E1 component beta subunit [EC:1.2.4.1]
103	K00163	-1.2352	-0.376471	-2.76913	-3.0072	2.87889	-0.93835	0.127143	0.00363476	0.00760418	7.57e-05	0.0019015	aceE; pyruvate dehydrogenase E1 component [EC:1.2.4.1]
104	K00164	-0.0562231	1.05108	-1.2169	-1.73037	2.80018	-0.515116	0.234286	0.086883	0.123543	0.00690617	0.0140556	OGDH, sucA; 2-oxoglutarate dehydrogenase E1 component [EC:1.2.4.2]
105	K00166	-10.1638	-10.7362	-9.14043	1.76172	6.60218	0.259145	0.369037	0.237797	0.285703	0.276401	0.328831	BCKDHA, bkdA1; 2-oxoisovalerate dehydrogenase E1 component alpha subunit [EC:1.2.4.4]
106	K00167	-10.1474	-10.6879	-9.18375	1.76937	6.63153	0.261507	0.366857	0.251578	0.298902	0.288076	0.339594	BCKDHB, bkdA2; 2-oxoisovalerate dehydrogenase E1 component beta subunit [EC:1.2.4.4]
107	K00169	2.20813	2.14633	2.79442	0.607677	1.35916	0.36549	0.332857	0.0830461	0.122061	0.103057	0.15095	porA; pyruvate ferredoxin oxidoreductase alpha subunit [EC:1.2.7.1]
108	K00170	2.58104	2.04135	3.074	1.00226	1.80347	0.503016	0.241074	0.0059171	0.0130281	0.00967378	0.0188581	porB; pyruvate ferredoxin oxidoreductase beta subunit [EC:1.2.7.1]
109	K00171	1.54292	1.1208	2.56627	1.52473	3.05381	0.420517	0.254213	0.00465851	0.0108139	0.0121391	0.023032	porD; pyruvate ferredoxin oxidoreductase delta subunit [EC:1.2.7.1]
110	K00172	2.72872	2.28956	3.17009	0.837458	1.4549	0.487149	0.264	0.023505	0.0403615	0.0197647	0.0355519	porG; pyruvate ferredoxin oxidoreductase gamma subunit [EC:1.2.7.1]
111	K00174	5.16293	4.65681	5.6707	0.953523	1.26898	0.60589	0.202514	0.00244244	0.00679263	0.00194559	0.00508964	korA, oorA, oforA; 2-oxoglutarate/2-oxoacid ferredoxin oxidoreductase subunit alpha [EC:1.2.7.3 1.2.7.11]
112	K00175	5.15868	4.65757	5.67522	0.93398	1.27852	0.588668	0.197087	0.00236302	0.00663615	0.00178691	0.00481153	korB, oorB, oforB; 2-oxoglutarate/2-oxoacid ferredoxin oxidoreductase subunit beta [EC:1.2.7.3 1.2.7.11]
113	K00176	4.40102	3.87417	4.94039	1.01265	1.20635	0.681241	0.154571	0.00140006	0.00456884	0.000308276	0.00295019	korD, oorD; 2-oxoglutarate ferredoxin oxidoreductase subunit delta [EC:1.2.7.3]
114	K00177	4.40553	3.87211	4.93975	1.00848	1.18573	0.669397	0.159669	0.00178044	0.00543277	0.000342207	0.00306654	korC, oorC; 2-oxoglutarate ferredoxin oxidoreductase subunit gamma [EC:1.2.7.3]
115	K00179	4.53001	4.03032	4.99771	0.85119	1.17501	0.573784	0.200857	0.00613376	0.0133886	0.00193864	0.00507934	iorA; indolepyruvate ferredoxin oxidoreductase, alpha subunit [EC:1.2.7.8]
116	K00180	4.52682	4.02942	4.9976	0.85015	1.17097	0.585451	0.198571	0.00663864	0.0142194	0.00210987	0.0053826	iorB; indolepyruvate ferredoxin oxidoreductase, beta subunit [EC:1.2.7.8]
117	K00183	-1.86922	-2.05853	-1.58262	0.666949	5.17518	0.125406	0.376857	0.0773766	0.110993	0.22711	0.297892	K00183; prokaryotic molybdopterin-containing oxidoreductase family, molybdopterin binding subunit
118	K00184	0.896335	0.859086	1.04308	0.290737	1.46608	0.077583	0.421429	0.160893	0.217423	0.439506	0.522081	K00184; prokaryotic molybdopterin-containing oxidoreductase family, iron-sulfur binding subunit
119	K00185	-0.947256	-1.63581	-0.614869	1.10972	4.58205	0.217924	0.346187	0.0149384	0.0274858	0.111365	0.161254	K00185; prokaryotic molybdopterin-containing oxidoreductase family, membrane subunit
120	K00194	2.619	2.11412	3.08478	0.913545	1.49322	0.550137	0.223429	0.00115483	0.00397544	0.0049565	0.0105903	cdhD, acsD; acetyl-CoA decarbonylase/synthase complex subunit delta [EC:2.1.1.245]
121	K00196	2.09401	1.91722	2.6067	0.630717	1.23837	0.411687	0.295143	0.022646	0.0390917	0.0398495	0.0659422	cooF; anaerobic carbon-monoxide dehydrogenase iron sulfur subunit
122	K00197	2.61681	2.11616	3.09229	0.913591	1.51603	0.544317	0.230857	0.00115906	0.00398542	0.00501514	0.0106942	cdhE, acsC; acetyl-CoA decarbonylase/synthase complex subunit gamma [EC:2.1.1.245]
123	K00198	3.34544	3.08666	3.85592	0.728554	1.1052	0.588608	0.220857	0.00158042	0.00498238	0.00453106	0.00982144	cooS, acsA; anaerobic carbon-monoxide dehydrogenase catalytic subunit [EC:1.2.7.4]
124	K00208	4.1751	3.86553	4.55737	0.665855	1.12178	0.546847	0.260783	0.00609762	0.0133299	0.0158075	0.0291169	fabI; enoyl-[acyl-carrier protein] reductase I [EC:1.3.1.9 1.3.1.10]
125	K00209	3.16538	2.72934	3.55942	1.00482	1.38728	0.612453	0.216224	0.00150132	0.00480271	0.00320887	0.00738479	fabV, ter; enoyl-[acyl-carrier protein] reductase / trans-2-enoyl-CoA reductase (NAD+) [EC:1.3.1.9 1.3.1.44]
126	K00210	3.31037	2.79178	4.01381	0.911376	3.05127	0.198826	0.319143	0.0281737	0.047237	0.0652661	0.10161	E1.3.1.12; prephenate dehydrogenase [EC:1.3.1.12]
127	K00215	6.1158	5.56653	6.41971	1.00651	1.04518	0.890119	0.179429	0.00010733	0.000954058	0.000970088	0.00357612	dapB; 4-hydroxy-tetrahydrodipicolinate reductase [EC:1.17.1.8]
128	K00216	-2.05814	-0.623881	-4.52389	-3.83721	4.27899	-0.755645	0.184804	0.00788293	0.0154376	0.0012215	0.00402801	entA; 2,3-dihydro-2,3-dihydroxybenzoate dehydrogenase [EC:1.3.1.28]
129	K00218	-7.41584	-4.17519	-8.07782	-1.58277	7.65627	-0.208165	0.394459	0.454041	0.514691	0.366091	0.436879	por; protochlorophyllide reductase [EC:1.3.1.33]
130	K00219	-0.0398047	0.687295	-1.51617	-2.64355	2.55365	-0.965832	0.122286	0.00885671	0.0157899	5.67e-05	0.00185169	fadH; 2,4-dienoyl-CoA reductase (NADPH2) [EC:1.3.1.34]
131	K00226	4.3476	3.81752	4.68894	0.959255	1.51679	0.520577	0.223429	0.00166019	0.00516676	0.00475446	0.0102272	pyrD; dihydroorotate dehydrogenase (fumarate) [EC:1.3.98.1]
132	K00228	-1.54609	-0.623354	-4.53709	-4.16151	4.4744	-0.821259	0.152571	0.00501489	0.0107014	0.000278888	0.00279837	CPOX, hemF; coproporphyrinogen III oxidase [EC:1.3.3.3]
133	K00230	0.552626	1.04823	-0.238351	-1.30332	1.45324	-0.891984	0.171143	0.000192404	0.00123492	0.000617493	0.00339834	hemG; menaquinone-dependent protoporphyrinogen oxidase [EC:1.3.5.3]
134	K00231	0.198902	-0.290405	0.955862	1.2551	1.97802	0.537247	0.272571	0.0813645	0.119541	0.0234514	0.0413731	PPOX, hemY; protoporphyrinogen/coproporphyrinogen III oxidase [EC:1.3.3.4 1.3.3.15]
135	K00232	-10.677	-11.1895	-9.80294	1.44562	4.77526	0.271863	0.363325	0.282033	0.325763	0.272616	0.319116	E1.3.3.6, ACOX1, ACOX3; acyl-CoA oxidase [EC:1.3.3.6]
136	K00239	5.0808	4.59845	5.3343	0.976621	1.0683	0.884351	0.181377	6.86e-05	0.000833365	0.000877707	0.00355884	sdhA, frdA; succinate dehydrogenase / fumarate reductase, flavoprotein subunit [EC:1.3.5.1 1.3.5.4]
137	K00240	4.86922	4.41311	5.1043	0.947403	1.08207	0.851526	0.186286	0.000149107	0.00108814	0.00111272	0.00377604	sdhB, frdB; succinate dehydrogenase / fumarate reductase, iron-sulfur subunit [EC:1.3.5.1 1.3.5.4]
138	K00241	4.11134	3.74218	4.54771	0.697436	1.11307	0.610693	0.2485	0.00348737	0.00880082	0.00992868	0.0192859	sdhC, frdC; succinate dehydrogenase / fumarate reductase, cytochrome b subunit
139	K00242	-1.55934	-0.623773	-4.27342	-3.75385	3.42801	-0.878118	0.166286	0.00533827	0.0109404	0.000389494	0.00312976	sdhD, frdD; succinate dehydrogenase / fumarate reductase, membrane anchor subunit
140	K00243	5.37371	5.10355	5.87202	1.0108	1.1351	0.780448	0.173714	0.000216736	0.0013114	0.000737771	0.00348676	K00243; uncharacterized protein
141	K00244	4.66424	4.50409	5.00632	0.419739	1.24421	0.282923	0.371894	0.0935376	0.135399	0.194219	0.261342	frdA; fumarate reductase flavoprotein subunit [EC:1.3.5.4]
142	K00245	0.500708	0.917112	0.166206	-0.944397	1.14996	-0.771628	0.193714	0.000329599	0.00167237	0.00137689	0.00430463	frdB; fumarate reductase iron-sulfur subunit [EC:1.3.5.4]
143	K00246	0.46314	0.874933	0.151373	-0.96188	1.22646	-0.75146	0.199086	0.000563065	0.00236879	0.00232546	0.0058303	frdC; fumarate reductase subunit C
144	K00247	-1.27444	-0.37664	-2.94419	-3.07021	2.87699	-0.952986	0.132857	0.00291048	0.00671829	7.38e-05	0.00188539	frdD; fumarate reductase subunit D
145	K00248	4.28269	3.58477	4.85978	1.55424	1.59829	0.803553	0.185376	0.000483153	0.00213928	0.000955692	0.00360184	ACADS, bcd; butyryl-CoA dehydrogenase [EC:1.3.8.1]
146	K00249	-10.4813	-10.769	-10.0344	0.552809	4.8245	0.102	0.446444	0.500275	0.55376	0.49674	0.554608	ACADM, acd; acyl-CoA dehydrogenase [EC:1.3.8.7]
147	K00252	-10.3961	-10.7785	-9.75343	0.982438	4.90015	0.181283	0.412571	0.396321	0.447382	0.405768	0.462035	GCDH, gcdH; glutaryl-CoA dehydrogenase [EC:1.3.8.6]
148	K00253	-10.4538	-10.7352	-10.0196	0.518743	4.59576	0.102514	0.450857	0.487269	0.538383	0.508704	0.563156	IVD, ivd; isovaleryl-CoA dehydrogenase [EC:1.3.8.4]
149	K00254	2.04151	2.05475	1.98365	-0.144382	1.25439	-0.115022	0.446158	0.431149	0.507935	0.627688	0.699204	DHODH, pyrD; dihydroorotate dehydrogenase [EC:1.3.5.2]
150	K00257	3.8864	3.38019	4.38279	0.918507	1.83506	0.341015	0.26421	0.0111655	0.0216622	0.016678	0.03056	mbtN, fadE14; acyl-ACP dehydrogenase [EC:1.3.99.-]
151	K00259	4.08341	3.86934	4.45403	0.710691	1.56352	0.413976	0.317429	0.0214694	0.0373573	0.0589955	0.0930333	ald; alanine dehydrogenase [EC:1.4.1.1]
152	K00260	0.366039	0.35392	0.412585	-0.0569169	1.57686	-0.0318619	0.482286	0.728138	0.780501	0.861294	0.893955	gudB, rocG; glutamate dehydrogenase [EC:1.4.1.2]
153	K00261	-1.09262	-0.733452	-2.89442	-1.70737	2.36334	-0.643143	0.248215	0.0176747	0.031482	0.00861292	0.0169834	GLUD1_2, gdhA; glutamate dehydrogenase (NAD(P)+) [EC:1.4.1.3]
154	K00262	6.32384	5.89145	6.68367	0.98676	1.11419	0.818234	0.181429	0.000100785	0.000934308	0.000761326	0.00350926	E1.4.1.4, gdhA; glutamate dehydrogenase (NADP+) [EC:1.4.1.4]
155	K00263	-9.79276	-10.4272	-8.8028	1.57653	5.7157	0.241934	0.388746	0.341572	0.393124	0.334372	0.392357	E1.4.1.9; leucine dehydrogenase [EC:1.4.1.9]
156	K00265	4.51993	4.0491	4.73679	0.863545	1.13307	0.71838	0.19623	0.000369546	0.0018035	0.00117193	0.00385102	gltB; glutamate synthase (NADPH/NADH) large chain [EC:1.4.1.13 1.4.1.14]
157	K00266	7.08925	6.49122	7.37008	1.11304	1.21249	0.798927	0.187143	0.000154249	0.00110487	0.00106445	0.00369277	gltD; glutamate synthase (NADPH/NADH) small chain [EC:1.4.1.13 1.4.1.14]
158	K00274	-9.60733	-9.87893	-9.1594	0.624804	4.97956	0.107854	0.442731	0.500693	0.555102	0.510614	0.570551	MAO, aofH; monoamine oxidase [EC:1.4.3.4]
159	K00275	2.16961	2.17358	2.12728	0.309562	1.80695	0.160915	0.439429	0.30659	0.379754	0.54876	0.628012	pdxH, PNPO; pyridoxamine 5'-phosphate oxidase [EC:1.4.3.5]
160	K00276	-9.27725	-9.43568	-9.03112	-0.0687259	6.07693	-0.0102742	0.496715	0.574723	0.630231	0.634937	0.69059	AOC3, AOC2, tynA; primary-amine oxidase [EC:1.4.3.21]
161	K00278	5.81166	5.34144	6.20382	1.13601	1.12314	0.866223	0.183429	0.0001056	0.000948645	0.000920522	0.00355567	nadB; L-aspartate oxidase [EC:1.4.3.16]
162	K00281	3.7121	3.56141	4.287	0.555317	1.54967	0.355861	0.334761	0.102124	0.14617	0.10808	0.157299	GLDC, gcvP; glycine dehydrogenase [EC:1.4.4.2]
163	K00282	1.51438	1.33544	2.33195	0.986265	2.23992	0.414429	0.299057	0.0666594	0.10071	0.048676	0.0786007	gcvPA; glycine dehydrogenase subunit 1 [EC:1.4.4.2]
164	K00283	1.5143	1.33792	2.3344	0.982442	2.23893	0.408293	0.306857	0.0657086	0.0994607	0.0538446	0.0858364	gcvPB; glycine dehydrogenase subunit 2 [EC:1.4.4.2]
165	K00284	4.88111	4.24438	5.22154	1.17005	1.26571	0.861485	0.184571	0.000198043	0.00125526	0.00112972	0.00376898	E1.4.7.1; glutamate synthase (ferredoxin) [EC:1.4.7.1]
166	K00285	-1.55474	-0.632967	-4.52004	-4.08224	4.48642	-0.818618	0.157143	0.00426109	0.00951819	0.000304856	0.00289531	dadA; D-amino-acid dehydrogenase [EC:1.4.5.1]
167	K00286	6.09504	5.546	6.43514	1.04799	1.03246	0.894733	0.180857	6.53e-05	0.00082793	0.000761079	0.00347875	proC; pyrroline-5-carboxylate reductase [EC:1.5.1.2]
168	K00287	5.83611	5.38973	6.13005	0.963739	1.01143	0.905098	0.165953	6.54e-05	0.000828507	0.000438382	0.00329723	DHFR, folA; dihydrofolate reductase [EC:1.5.1.3]
169	K00289	-6.29193	-8.93624	-4.26907	3.07058	6.9113	0.410349	0.346857	0.117692	0.157303	0.150821	0.206099	ALDH1L; formyltetrahydrofolate dehydrogenase [EC:1.5.1.6]
170	K00290	5.25632	4.78185	5.68879	1.06231	1.20509	0.779115	0.158241	0.000105626	0.000949249	0.000381158	0.00316607	LYS1; saccharopine dehydrogenase (NAD+, L-lysine forming) [EC:1.5.1.7]
171	K00294	-0.497393	-2.26059	0.436459	2.68209	6.21965	0.40922	0.333048	0.00210769	0.0060989	0.0928845	0.137928	E1.2.1.88; 1-pyrroline-5-carboxylate dehydrogenase [EC:1.2.1.88]
172	K00297	6.02207	5.6322	6.32043	0.976206	1.13275	0.791486	0.193143	0.000137689	0.00104888	0.00117659	0.0038575	metF, MTHFR; methylenetetrahydrofolate reductase (NADPH) [EC:1.5.1.20]
173	K00298	-7.59951	-7.51161	-7.65853	0.379241	6.98987	0.048679	0.481143	0.674002	0.723059	0.708498	0.760283	ceo; N5-(carboxyethyl)ornithine synthase [EC:1.5.1.24]
174	K00299	-2.05697	-0.619965	-4.26381	-3.60578	4.22368	-0.735907	0.197714	0.0103806	0.0195564	0.00184508	0.0049597	ssuE; FMN reductase [EC:1.5.1.38]
175	K00301	-10.6092	-11.1985	-9.50423	1.76088	4.59244	0.34486	0.33876	0.22057	0.259059	0.194469	0.23542	E1.5.3.1; sarcosine oxidase [EC:1.5.3.1]
176	K00302	-9.74831	-10.3521	-8.79251	1.6099	5.61648	0.257914	0.38589	0.342268	0.393717	0.339257	0.39557	soxA; sarcosine oxidase, subunit alpha [EC:1.5.3.1]
177	K00303	-7.90573	-6.33036	-9.14279	-2.40612	6.35014	-0.33893	0.359143	0.256806	0.310574	0.227889	0.288495	soxB; sarcosine oxidase, subunit beta [EC:1.5.3.1]
178	K00304	-10.5951	-10.9479	-10.0007	0.821755	4.41529	0.15675	0.419023	0.423732	0.473025	0.411653	0.467647	soxD; sarcosine oxidase, subunit delta [EC:1.5.3.1]
179	K00305	-10.6022	-10.9431	-10.0738	0.81995	4.55054	0.155749	0.425143	0.440329	0.490161	0.441623	0.496462	soxG; sarcosine oxidase, subunit gamma [EC:1.5.3.1]
180	K00311	-10.4573	-10.7087	-10.017	0.514734	4.52383	0.0921589	0.453299	0.48142	0.533849	0.506032	0.562854	ETFDH; electron-transferring-flavoprotein dehydrogenase [EC:1.5.5.1]
181	K00313	-0.0448409	1.07211	-1.42437	-2.099	2.21854	-0.845665	0.171951	0.000313303	0.00162597	0.000544889	0.00334291	fixC; electron transfer flavoprotein-quinone oxidoreductase [EC:1.5.5.-]
182	K00316	-9.74414	-9.49658	-10.0018	-1.28377	5.60536	-0.202083	0.41331	0.355572	0.409055	0.441769	0.501832	spdH; spermidine dehydrogenase [EC:1.5.99.6]
183	K00318	-0.653448	-4.39337	0.0606473	4.02387	6.67786	0.609385	0.331714	0.00080148	0.00303046	0.0811228	0.122744	PRODH; proline dehydrogenase [EC:1.5.-.-]
184	K00322	-1.55594	-0.628139	-4.50374	-4.13316	4.46784	-0.829478	0.153385	0.00371576	0.0085957	0.000288395	0.00282963	sthA, udhA; NAD(P) transhydrogenase [EC:1.6.1.1]
185	K00324	3.37635	2.63165	4.1737	1.66299	2.11426	0.765643	0.150528	0.000189368	0.00122605	0.000317324	0.00298167	pntA; NAD(P) transhydrogenase subunit alpha [EC:1.6.1.2]
186	K00325	2.42186	2.01766	3.18834	1.25679	1.76165	0.625641	0.203714	0.0015057	0.00480753	0.00184847	0.00493057	pntB; NAD(P) transhydrogenase subunit beta [EC:1.6.1.2]
187	K00330	3.94508	3.56482	4.34979	0.826874	1.17192	0.634325	0.236857	0.00213444	0.00617325	0.00563659	0.0118306	nuoA; NADH-quinone oxidoreductase subunit A [EC:1.6.5.3]
188	K00331	3.94726	3.56577	4.3432	0.846586	1.18446	0.638657	0.230286	0.00212977	0.0061657	0.00559292	0.0117515	nuoB; NADH-quinone oxidoreductase subunit B [EC:1.6.5.3]
189	K00332	-6.69437	-6.93253	-4.8471	1.78471	6.75652	0.241088	0.396571	0.394258	0.455929	0.294366	0.36613	nuoC; NADH-quinone oxidoreductase subunit C [EC:1.6.5.3]
190	K00333	-6.66447	-6.91821	-4.7537	1.76485	6.81193	0.235722	0.391714	0.386391	0.447637	0.280642	0.351114	nuoD; NADH-quinone oxidoreductase subunit D [EC:1.6.5.3]
191	K00334	4.99311	4.46585	5.62291	0.986545	1.10154	0.811565	0.208286	0.000680389	0.00271439	0.00275466	0.00654312	nuoE; NADH-quinone oxidoreductase subunit E [EC:1.6.5.3]
192	K00335	4.74285	4.37221	5.14421	0.805382	0.949717	0.769999	0.194571	0.00119545	0.00407214	0.0020424	0.00526143	nuoF; NADH-quinone oxidoreductase subunit F [EC:1.6.5.3]
193	K00336	5.27633	4.40772	5.59478	1.0208	0.975878	0.881873	0.190803	0.000432834	0.00198856	0.00127187	0.00398514	nuoG; NADH-quinone oxidoreductase subunit G [EC:1.6.5.3]
194	K00337	3.94944	3.5794	4.351	0.832359	1.23987	0.63381	0.231714	0.00224304	0.00639386	0.00644243	0.0132555	nuoH; NADH-quinone oxidoreductase subunit H [EC:1.6.5.3]
195	K00338	3.94878	3.5645	4.345	0.859975	1.18835	0.669346	0.23479	0.0020994	0.00610334	0.00562242	0.0118046	nuoI; NADH-quinone oxidoreductase subunit I [EC:1.6.5.3]
196	K00339	3.94806	3.56462	4.35047	0.857591	1.19279	0.654265	0.234219	0.00213235	0.00617241	0.00562106	0.0118014	nuoJ; NADH-quinone oxidoreductase subunit J [EC:1.6.5.3]
197	K00340	3.949	3.56458	4.34397	0.846157	1.17206	0.647815	0.235361	0.00215065	0.00620826	0.00563659	0.0118307	nuoK; NADH-quinone oxidoreductase subunit K [EC:1.6.5.3]
198	K00341	3.94802	3.56448	4.34311	0.848549	1.16671	0.650359	0.227143	0.00229086	0.00648859	0.00565573	0.0118626	nuoL; NADH-quinone oxidoreductase subunit L [EC:1.6.5.3]
199	K00342	3.94774	3.56456	4.34704	0.855818	1.19533	0.648621	0.236504	0.0021291	0.00616268	0.00564346	0.0118425	nuoM; NADH-quinone oxidoreductase subunit M [EC:1.6.5.3]
200	K00343	3.94789	3.56562	4.35328	0.835079	1.18523	0.637768	0.230791	0.00212394	0.00615201	0.00564883	0.011851	nuoN; NADH-quinone oxidoreductase subunit N [EC:1.6.5.3]
201	K00344	-1.52198	-0.610993	-3.79321	-3.24011	3.138	-0.956181	0.122	0.00306852	0.0067024	5.95e-05	0.0018551	qor, CRYZ; NADPH2:quinone reductase [EC:1.6.5.5]
202	K00346	4.00639	3.54637	4.41006	0.883498	1.56743	0.41666	0.243645	0.00670588	0.0143292	0.00770749	0.0154814	nqrA; Na+-transporting NADH:ubiquinone oxidoreductase subunit A [EC:1.6.5.8]
203	K00347	4.00689	3.5484	4.38816	0.875088	1.57565	0.415019	0.239931	0.0058226	0.0128764	0.00761147	0.015315	nqrB; Na+-transporting NADH:ubiquinone oxidoreductase subunit B [EC:1.6.5.8]
204	K00348	4.00459	3.55617	4.40036	0.885085	1.56866	0.434306	0.237646	0.00561338	0.0125298	0.00801402	0.0160148	nqrC; Na+-transporting NADH:ubiquinone oxidoreductase subunit C [EC:1.6.5.8]
205	K00349	4.00499	3.54648	4.40424	0.871207	1.54487	0.433749	0.231077	0.00585201	0.0129239	0.00772707	0.0155159	nqrD; Na+-transporting NADH:ubiquinone oxidoreductase subunit D [EC:1.6.5.8]
206	K00350	4.00435	3.54714	4.39766	0.912292	1.56931	0.412158	0.240503	0.00586815	0.0129523	0.00768814	0.0154479	nqrE; Na+-transporting NADH:ubiquinone oxidoreductase subunit E [EC:1.6.5.8]
207	K00351	4.01537	3.60007	4.38889	0.866864	1.47754	0.452561	0.241645	0.00596104	0.0131044	0.00874494	0.0172829	nqrF; Na+-transporting NADH:ubiquinone oxidoreductase subunit F [EC:1.6.5.8]
208	K00354	-3.907	-2.75939	-6.7493	-2.85283	5.16041	-0.510401	0.257355	0.049482	0.0746125	0.0152768	0.0278941	E1.6.99.1; NADPH2 dehydrogenase [EC:1.6.99.1]
209	K00355	-1.217	-1.1828	-1.29727	-0.219762	2.06829	-0.0987019	0.451585	0.792883	0.833922	0.691943	0.753956	NQO1; NAD(P)H dehydrogenase (quinone) [EC:1.6.5.2]
210	K00356	-10.5453	-10.8236	-10.0051	0.631217	4.55608	0.120356	0.437304	0.4476	0.501104	0.470471	0.528545	E1.6.99.3; NADH dehydrogenase [EC:1.6.99.3]
211	K00362	-1.29649	-0.245265	-3.61699	-3.47277	3.41424	-0.968017	0.10597	0.00228277	0.00584192	1.85e-05	0.00184305	nirB; nitrite reductase (NADH) large subunit [EC:1.7.1.15]
212	K00363	-2.06078	-0.622224	-4.52733	-3.84365	4.1778	-0.776347	0.190803	0.00735336	0.0145627	0.00125307	0.00407366	nirD; nitrite reductase (NADH) small subunit [EC:1.7.1.15]
213	K00364	1.27093	1.55427	1.01522	-0.511607	1.56739	-0.295903	0.375321	0.274144	0.344534	0.224624	0.295983	E1.7.1.7, guaC; GMP reductase [EC:1.7.1.7]
214	K00366	3.45553	2.49987	3.91111	1.1762	1.76331	0.591402	0.279143	0.00369241	0.00918285	0.0282608	0.0488187	nirA; ferredoxin-nitrite reductase [EC:1.7.7.1]
215	K00368	-9.06503	-9.06093	-9.08123	-0.297887	5.53916	-0.0504845	0.474286	0.614627	0.667825	0.66041	0.713561	nirK; nitrite reductase (NO-forming) [EC:1.7.2.1]
216	K00370	-0.132864	0.597784	-1.32722	-2.09064	3.02024	-0.620092	0.251429	0.0142571	0.026383	0.0123322	0.0233351	narG, narZ, nxrA; nitrate reductase / nitrite oxidoreductase, alpha subunit [EC:1.7.5.1 1.7.99.-]
217	K00371	-0.132515	0.596282	-1.32459	-2.14305	3.0006	-0.626439	0.255429	0.0139955	0.0259838	0.0122463	0.023194	narH, narY, nxrB; nitrate reductase / nitrite oxidoreductase, beta subunit [EC:1.7.5.1 1.7.99.-]
218	K00372	-0.575812	0.17795	-0.670164	-0.672798	2.50021	-0.158989	0.434162	0.882046	0.906914	0.491027	0.573256	nasA; assimilatory nitrate reductase catalytic subunit [EC:1.7.99.-]
219	K00373	0.00314383	0.597241	-1.32928	-1.93574	3.28481	-0.538441	0.282776	0.0379354	0.0612267	0.0318087	0.0540938	narJ, narW; nitrate reductase molybdenum cofactor assembly chaperone NarJ/NarW
220	K00374	0.343229	0.601409	-0.789774	-1.43912	2.20063	-0.624786	0.240286	0.00638039	0.0137809	0.00797036	0.015892	narI, narV; nitrate reductase gamma subunit [EC:1.7.5.1 1.7.99.-]
221	K00375	5.32167	4.58231	5.67787	1.1434	1.18125	0.874303	0.199429	0.000284433	0.00153798	0.00243501	0.00596148	K00375; GntR family transcriptional regulator / MocR family aminotransferase
222	K00380	-0.991244	-0.140187	-2.75926	-2.70862	2.88703	-0.809834	0.169666	0.0139185	0.0238385	0.00059721	0.00340162	cysJ; sulfite reductase (NADPH) flavoprotein alpha-component [EC:1.8.1.2]
223	K00381	-1.13086	-0.427375	-4.09315	-3.59009	4.44518	-0.688126	0.18966	0.00872184	0.0171923	0.00152893	0.00443992	cysI; sulfite reductase (NADPH) hemoprotein beta-component [EC:1.8.1.2]
224	K00382	5.1862	4.9746	5.53624	0.699782	0.866984	0.834351	0.167429	0.000392199	0.00186815	0.000464769	0.0032802	DLD, lpd, pdhD; dihydrolipoamide dehydrogenase [EC:1.8.1.4]
225	K00383	0.557586	0.947334	-0.528944	-0.959643	2.01958	-0.442534	0.318766	0.0658691	0.0995907	0.0692569	0.106741	GSR, gor; glutathione reductase (NADPH) [EC:1.8.1.7]
226	K00384	6.81918	6.35625	7.14185	0.953426	1.07467	0.839371	0.187089	0.000143561	0.00106776	0.0012653	0.00394631	trxB, TRR; thioredoxin reductase (NADPH) [EC:1.8.1.9]
227	K00385	0.976573	1.16431	0.674724	-0.375389	1.57612	-0.235811	0.397429	0.26398	0.333491	0.29021	0.368376	asrC; anaerobic sulfite reductase subunit C
228	K00389	-1.06198	0.439981	-2.34416	-2.71844	2.44632	-0.969541	0.161429	0.000289563	0.00153218	0.00034159	0.00299101	yidH; putative membrane protein
229	K00390	3.08519	2.41529	3.62662	0.830036	2.03154	0.349646	0.323714	0.302738	0.375726	0.0765357	0.116647	cysH; phosphoadenosine phosphosulfate reductase [EC:1.8.4.8 1.8.4.10]
230	K00392	-10.2412	-10.7145	-9.39054	1.43853	5.19373	0.237016	0.387032	0.358379	0.40766	0.339209	0.393302	sir; sulfite reductase (ferredoxin) [EC:1.8.7.1]
231	K00394	2.60383	1.97679	2.98973	1.16133	1.98522	0.528496	0.239714	0.0109449	0.0209892	0.00703537	0.0142947	aprA; adenylylsulfate reductase, subunit A [EC:1.8.99.2]
232	K00395	2.60534	1.97893	2.99238	1.17195	1.97248	0.51284	0.235647	0.0107102	0.0206222	0.00695767	0.0141581	aprB; adenylylsulfate reductase, subunit B [EC:1.8.99.2]
233	K00404	-10.4704	-10.737	-10.0211	0.46249	4.73294	0.0905589	0.453714	0.485584	0.539099	0.483616	0.54322	ccoN; cytochrome c oxidase cbb3-type subunit I [EC:1.9.3.1]
234	K00405	-10.4442	-10.6841	-10.0256	0.460736	4.63065	0.0885208	0.455013	0.485242	0.53892	0.51186	0.569691	ccoO; cytochrome c oxidase cbb3-type subunit II
235	K00406	-10.4455	-10.737	-9.96771	0.637152	4.65116	0.122247	0.437875	0.476218	0.528957	0.488629	0.546931	ccoP; cytochrome c oxidase cbb3-type subunit III
236	K00407	-10.5405	-10.845	-10.0121	0.547411	4.70051	0.100716	0.449429	0.486638	0.53907	0.480893	0.538579	ccoQ; cytochrome c oxidase cbb3-type subunit IV
237	K00410	-9.79311	-9.58687	-10.0559	-1.268	5.73672	-0.194719	0.416	0.352163	0.405334	0.445045	0.503108	fbcH; ubiquinol-cytochrome c reductase cytochrome b/c1 subunit
238	K00411	-9.37171	-8.61436	-10.0285	-2.09698	5.48934	-0.33814	0.346571	0.20466	0.247557	0.223051	0.274095	UQCRFS1, RIP1, petA; ubiquinol-cytochrome c reductase iron-sulfur subunit [EC:1.10.2.2]
239	K00412	-9.35387	-8.63115	-10.0186	-1.93803	5.51164	-0.318821	0.35647	0.223915	0.268713	0.233085	0.284842	CYTB, petB; ubiquinol-cytochrome c reductase cytochrome b subunit
240	K00413	-10.481	-10.7655	-10.0196	0.573138	4.53627	0.106128	0.44473	0.474193	0.525327	0.490842	0.547064	CYC1, CYT1, petC; ubiquinol-cytochrome c reductase cytochrome c1 subunit
241	K00425	4.29511	4.18433	4.62113	0.493649	0.922014	0.501644	0.286571	0.0203188	0.0356416	0.0242672	0.042636	cydA; cytochrome bd ubiquinol oxidase subunit I [EC:1.10.3.14]
242	K00426	4.29338	4.18284	4.62084	0.515152	0.922131	0.548745	0.271637	0.0202899	0.0355997	0.0242975	0.0426717	cydB; cytochrome bd ubiquinol oxidase subunit II [EC:1.10.3.14]
243	K00427	-2.05448	-0.619683	-4.53396	-3.95899	4.67748	-0.759715	0.181091	0.00682639	0.0140277	0.00122115	0.00403345	lldP, lctP; L-lactate permease
244	K00428	1.88114	2.16735	1.59819	-0.585314	1.20359	-0.435342	0.295915	0.0542108	0.0838999	0.0356316	0.0597687	E1.11.1.5; cytochrome c peroxidase [EC:1.11.1.5]
245	K00432	3.85185	3.67757	4.39781	0.695121	1.1121	0.581076	0.283919	0.00652308	0.0140318	0.0282913	0.0487939	gpx; glutathione peroxidase [EC:1.11.1.9]
246	K00433	0.848635	0.823084	1.01428	0.292323	1.77459	0.169675	0.423879	0.327823	0.402171	0.450684	0.53354	cpo; non-heme chloroperoxidase [EC:1.11.1.10]
247	K00435	-10.364	-10.4982	-10.1568	0.102326	5.08262	0.0149896	0.491143	0.545156	0.600522	0.548582	0.607532	hemQ; Fe-coproporphyrin III decarboxylase [EC:1.11.1.-]
248	K00437	-4.95737	-8.97386	-2.66584	3.3009	7.79664	0.465089	0.344	0.0465148	0.0691743	0.123202	0.173748	hydB; [NiFe] hydrogenase large subunit [EC:1.12.2.1]
249	K00441	-6.32291	-8.91128	-4.26869	2.75795	6.89231	0.384914	0.351614	0.124915	0.165835	0.152953	0.208561	frhB; coenzyme F420 hydrogenase subunit beta [EC:1.12.98.1]
250	K00448	-9.66308	-9.73505	-9.5692	-0.297956	6.08654	-0.0463361	0.477578	0.55295	0.607945	0.610698	0.667756	pcaG; protocatechuate 3,4-dioxygenase, alpha subunit [EC:1.13.11.3]
251	K00449	-9.62782	-9.72936	-9.50579	-0.327202	6.03156	-0.0499799	0.474722	0.538842	0.592742	0.602814	0.659634	pcaH; protocatechuate 3,4-dioxygenase, beta subunit [EC:1.13.11.3]
252	K00450	1.10588	0.987843	1.53148	0.841823	2.23272	0.301674	0.378571	0.177937	0.237196	0.243946	0.317864	E1.13.11.4; gentisate 1,2-dioxygenase [EC:1.13.11.4]
253	K00451	-10.5949	-10.9185	-10.0704	0.825668	4.36127	0.160023	0.426164	0.420411	0.468179	0.42081	0.475249	HGD, hmgA; homogentisate 1,2-dioxygenase [EC:1.13.11.5]
254	K00455	-9.09685	-9.19139	-8.97386	-0.462016	6.27973	-0.0617059	0.467009	0.546988	0.601424	0.63537	0.690037	hpaD, hpcB; 3,4-dihydroxyphenylacetate 2,3-dioxygenase [EC:1.13.11.15]
255	K00457	-9.4915	-9.41291	-9.60098	-0.880239	5.99901	-0.128041	0.443429	0.449827	0.50642	0.544668	0.604223	HPD, hppD; 4-hydroxyphenylpyruvate dioxygenase [EC:1.13.11.27]
256	K00459	0.506912	0.814652	0.3399	-0.149001	2.37534	-0.043612	0.475714	0.280839	0.351949	0.822458	0.863676	ncd2, npd; nitronate monooxygenase [EC:1.13.12.16]
257	K00467	-8.25654	-9.16834	-6.53082	1.92472	7.12895	0.249843	0.396173	0.301937	0.360083	0.31175	0.379298	E1.13.12.4; lactate 2-monooxygenase [EC:1.13.12.4]
258	K00477	-10.6474	-11.0237	-10.0036	0.941813	4.47696	0.191371	0.407143	0.417648	0.465145	0.38451	0.438801	PHYH; phytanoyl-CoA hydroxylase [EC:1.14.11.18]
259	K00479	-10.611	-10.9736	-9.99623	0.854647	4.4724	0.159032	0.414286	0.400621	0.45279	0.396568	0.453665	gbcA; glycine betaine catabolism A
260	K00480	-9.31396	-9.14794	-9.50824	-1.22418	5.73158	-0.187971	0.423429	0.398187	0.454977	0.464869	0.526731	E1.14.13.1; salicylate hydroxylase [EC:1.14.13.1]
261	K00481	-9.68078	-9.77659	-9.55812	-0.370243	6.09215	-0.0546752	0.473293	0.543278	0.597582	0.598618	0.656686	pobA; p-hydroxybenzoate 3-monooxygenase [EC:1.14.13.2]
262	K00483	-5.43699	-5.3765	-5.46329	0.059366	6.8217	0.00817726	0.495143	0.699705	0.747615	0.832455	0.868624	hpaB; 4-hydroxyphenylacetate 3-monooxygenase [EC:1.14.14.9]
263	K00484	-8.07733	-6.88894	-9.02543	-3.00474	6.45843	-0.42353	0.33876	0.0993104	0.133892	0.142813	0.191323	hpaC; flavin reductase (NADH) [EC:1.5.1.36]
264	K00496	-10.5944	-10.9341	-10.043	0.813363	4.45113	0.161394	0.417309	0.416412	0.466803	0.423706	0.47996	alkB1_2, alkM; alkane 1-monooxygenase [EC:1.14.15.3]
265	K00500	-10.4615	-10.739	-10.0819	0.506454	4.48839	0.0976895	0.453429	0.487001	0.539343	0.502305	0.559397	phhA, PAH; phenylalanine-4-hydroxylase [EC:1.14.16.1]
266	K00507	-10.6549	-11.0083	-10.0536	0.858004	4.46677	0.15831	0.418857	0.454957	0.504156	0.431531	0.487026	SCD, desC; stearoyl-CoA desaturase (Delta-9 desaturase) [EC:1.14.19.1]
267	K00508	-10.645	-10.9895	-10.0182	0.848005	4.31632	0.171643	0.417595	0.428234	0.47677	0.414908	0.470856	E1.14.19.3; linoleoyl-CoA desaturase [EC:1.14.19.3]
268	K00510	-5.5913	-5.99217	-4.99233	1.03652	6.75903	0.134086	0.431591	0.560516	0.61998	0.535774	0.608386	HMOX1; heme oxygenase 1 [EC:1.14.14.18]
269	K00517	-10.1643	-10.5977	-9.43256	1.00545	4.52515	0.187614	0.405313	0.386067	0.436756	0.388731	0.446023	CYP81F; indol-3-yl-methylglucosinolate hydroxylase [EC:1.14.-.-]
270	K00520	-5.24005	-5.37137	-5.02138	1.25729	6.98931	0.175678	0.414857	0.351338	0.414902	0.454124	0.531077	merA; mercuric reductase [EC:1.16.1.1]
271	K00523	-6.37265	-9.28225	-2.6116	4.94832	7.92365	0.580135	0.305913	0.0385922	0.0580425	0.0636822	0.0972698	ascD, ddhD, rfbI; CDP-4-dehydro-6-deoxyglucose reductase, E3 [EC:1.17.1.1]
272	K00525	5.38713	5.12118	5.86355	0.769369	0.83166	0.903226	0.169714	0.00013411	0.00103776	0.000553278	0.00341882	E1.17.4.1A, nrdA, nrdE; ribonucleoside-diphosphate reductase alpha chain [EC:1.17.4.1]
273	K00526	4.31823	4.21651	4.682	0.598942	0.836053	0.701687	0.219937	0.00413526	0.00996399	0.00537699	0.0113477	E1.17.4.1B, nrdB, nrdF; ribonucleoside-diphosphate reductase beta chain [EC:1.17.4.1]
274	K00527	6.50339	5.95752	6.89993	0.976745	1.04329	0.871443	0.183091	0.000158024	0.00111793	0.00100399	0.00362744	rtpR; ribonucleoside-triphosphate reductase (thioredoxin) [EC:1.17.4.2]
275	K00528	5.52266	5.08624	6.0763	1.07761	1.17195	0.901669	0.18	8.32e-05	0.000873381	0.000880273	0.00353372	fpr; ferredoxin/flavodoxin---NADP+ reductase [EC:1.18.1.2 1.19.1.1]
276	K00529	-7.86166	-7.49039	-8.10137	-0.86836	6.10807	-0.122823	0.446857	0.556338	0.612907	0.585137	0.64779	hcaD; 3-phenylpropionate/trans-cinnamate dioxygenase ferredoxin reductase component [EC:1.18.1.3]
277	K00532	0.579381	0.90959	0.32764	-0.57038	1.38256	-0.411279	0.333619	0.0751382	0.111655	0.0959628	0.141653	E1.12.7.2; ferredoxin hydrogenase [EC:1.12.7.2]
278	K00533	2.51928	2.08368	3.12303	0.965715	1.25143	0.731273	0.194571	0.00151036	0.00481681	0.0017143	0.00469534	E1.12.7.2L; ferredoxin hydrogenase large subunit [EC:1.12.7.2]
279	K00534	-4.9689	-9.09115	-2.65518	3.31065	7.73934	0.449191	0.344	0.0451065	0.0673596	0.120312	0.169813	E1.12.7.2S; ferredoxin hydrogenase small subunit [EC:1.12.7.2]
280	K00537	5.37022	4.77174	5.77326	0.958453	0.973106	0.866205	0.211143	0.00053881	0.00230205	0.00255355	0.00617961	ARSC1, arsC; arsenate reductase [EC:1.20.4.1]
281	K00547	2.27212	1.71349	2.85007	1.17869	1.50727	0.702304	0.236571	0.00136021	0.00447006	0.00748494	0.0150854	mmuM, BHMT2; homocysteine S-methyltransferase [EC:2.1.1.10]
282	K00548	6.12479	5.58244	6.55323	1.03676	1.07679	0.884387	0.183376	0.000120167	0.000993448	0.00106332	0.00368951	metH, MTR; 5-methyltetrahydrofolate--homocysteine methyltransferase [EC:2.1.1.13]
283	K00549	4.01018	3.51635	4.12324	0.741948	0.984547	0.716444	0.222	0.00205772	0.0060102	0.00532279	0.0112414	metE; 5-methyltetrahydropteroyltriglutamate--homocysteine methyltransferase [EC:2.1.1.14]
284	K00554	5.88254	5.53092	6.35877	1.06768	1.06592	0.902986	0.17595	6.77e-05	0.000829342	0.000843885	0.00349881	trmD; tRNA (guanine37-N1)-methyltransferase [EC:2.1.1.228]
285	K00556	0.790146	0.64878	1.46039	0.375293	2.24984	0.154955	0.43102	0.930836	0.946321	0.497716	0.579847	trmH; tRNA (guanosine-2'-O-)-methyltransferase [EC:2.1.1.34]
286	K00557	-0.600874	-0.134138	-2.67789	-2.15128	3.78517	-0.511561	0.321337	0.0531365	0.0823688	0.0727539	0.111593	trmA; tRNA (uracil-5-)-methyltransferase [EC:2.1.1.35]
287	K00558	6.41922	5.94711	7.11858	1.20194	1.2254	0.921156	0.186233	0.00016617	0.00114808	0.00114663	0.00378977	DNMT1, dcm; DNA (cytosine-5)-methyltransferase 1 [EC:2.1.1.37]
288	K00560	5.73161	5.36138	5.99784	1.02612	1.1218	0.85633	0.157669	8.74e-05	0.00088867	0.000408094	0.00324761	thyA, TYMS; thymidylate synthase [EC:2.1.1.45]
289	K00561	1.61449	1.25853	1.87248	0.831516	2.92714	0.256853	0.377035	0.0991234	0.142429	0.227353	0.299352	ermC, ermA; 23S rRNA (adenine-N6)-dimethyltransferase [EC:2.1.1.184]
290	K00563	3.66898	3.06806	4.57131	1.06075	1.77594	0.549613	0.309143	0.0543316	0.0841632	0.0577367	0.0911716	rlmA1; 23S rRNA (guanine745-N1)-methyltransferase [EC:2.1.1.187]
291	K00564	2.0348	2.39896	1.73726	-0.508359	1.47902	-0.315717	0.375321	0.235267	0.301866	0.204464	0.273134	rsmC; 16S rRNA (guanine1207-N2)-methyltransferase [EC:2.1.1.172]
292	K00566	6.40003	6.00653	6.84181	0.896723	1.16646	0.710274	0.207143	0.000466087	0.00208597	0.00248895	0.00606216	mnmA, trmU; tRNA-uridine 2-sulfurtransferase [EC:2.8.1.13]
293	K00567	5.77172	5.36228	6.04836	0.918059	1.04337	0.799844	0.199372	0.000254426	0.00143757	0.00147124	0.00427238	ogt, MGMT; methylated-DNA-[protein]-cysteine S-methyltransferase [EC:2.1.1.63]
294	K00568	-1.43598	-0.543754	-3.8269	-3.43908	4.14211	-0.740401	0.152286	0.00463005	0.0103983	0.000270887	0.00276573	ubiG; 2-polyprenyl-6-hydroxyphenyl methylase / 3-demethylubiquinone-9 3-methyltransferase [EC:2.1.1.222 2.1.1.64]
295	K00569	-10.6034	-10.9625	-9.9594	0.822372	4.42834	0.165381	0.417714	0.419127	0.468202	0.427075	0.481199	TPMT, tpmT; thiopurine S-methyltransferase [EC:2.1.1.67]
296	K00571	5.74766	5.47183	6.01398	0.808632	0.969153	0.758307	0.1988	0.000218508	0.00131764	0.00176313	0.00478197	E2.1.1.72; site-specific DNA-methyltransferase (adenine-specific) [EC:2.1.1.72]
297	K00573	-1.01094	-0.334456	-1.93697	-1.91781	2.38378	-0.671698	0.157143	0.00980345	0.0189631	0.000298539	0.0027859	E2.1.1.77, pcm; protein-L-isoaspartate(D-aspartate) O-methyltransferase [EC:2.1.1.77]
298	K00574	3.53099	3.37075	3.61537	0.37228	0.887887	0.378481	0.335429	0.0646539	0.0980225	0.0987042	0.145234	cfa; cyclopropane-fatty-acyl-phospholipid synthase [EC:2.1.1.79]
299	K00575	3.57632	2.76702	4.15295	1.32445	1.21921	0.945945	0.186286	0.000131146	0.00102864	0.00112894	0.00377027	cheR; chemotaxis protein methyltransferase CheR [EC:2.1.1.80]
300	K00588	-9.02357	-8.92833	-9.1202	-0.829914	7.54735	-0.105314	0.453143	0.494216	0.553482	0.616974	0.674715	E2.1.1.104; caffeoyl-CoA O-methyltransferase [EC:2.1.1.104]
301	K00590	-4.08045	-4.06694	-4.73579	-0.481812	7.89514	-0.0600483	0.473579	0.763958	0.805867	0.814601	0.85377	E2.1.1.113; site-specific DNA-methyltransferase (cytosine-N4-specific) [EC:2.1.1.113]
302	K00595	4.93785	4.58494	5.50454	1.06824	1.09879	0.900656	0.159143	7.68e-05	0.000852296	0.000308765	0.00295743	cobL; precorrin-6Y C5,15-methyltransferase (decarboxylating) [EC:2.1.1.132]
303	K00598	-0.852235	-0.16419	-1.82069	-1.65413	2.40265	-0.638503	0.233714	0.0121551	0.0231546	0.00772421	0.015472	tam; trans-aconitate 2-methyltransferase [EC:2.1.1.144]
304	K00600	5.95766	5.56481	6.3483	0.951078	1.03715	0.915641	0.166857	8.13e-05	0.000865762	0.000792191	0.00350341	glyA, SHMT; glycine hydroxymethyltransferase [EC:2.1.2.1]
305	K00602	6.40536	5.90678	6.66064	0.996974	1.05053	0.834949	0.170237	7.41e-05	0.000841487	0.000475785	0.00338019	purH; phosphoribosylaminoimidazolecarboxamide formyltransferase / IMP cyclohydrolase [EC:2.1.2.3 3.5.4.10]
306	K00603	3.53495	3.3764	4.27655	0.868772	2.35482	0.327093	0.312571	0.0342748	0.0561679	0.0735492	0.112729	fctD; glutamate formiminotransferase [EC:2.1.2.5]
307	K00604	5.98595	5.53296	6.39364	0.966847	1.03	0.885133	0.17395	7.33e-05	0.000839841	0.000782137	0.00348687	MTFMT, fmt; methionyl-tRNA formyltransferase [EC:2.1.2.9]
308	K00605	4.12205	3.94747	4.58184	0.622093	1.00255	0.61473	0.252499	0.00577834	0.0127941	0.00991763	0.0192682	gcvT, AMT; aminomethyltransferase [EC:2.1.2.10]
309	K00606	4.85435	4.32691	5.35453	0.932877	1.12443	0.735543	0.194857	0.000623967	0.0025537	0.0018929	0.00500774	panB; 3-methyl-2-oxobutanoate hydroxymethyltransferase [EC:2.1.2.11]
310	K00609	5.99993	5.46245	6.37807	1.018	1.06817	0.903823	0.176521	7.06e-05	0.000833621	0.000714747	0.00348032	pyrB, PYR2; aspartate carbamoyltransferase catalytic subunit [EC:2.1.3.2]
311	K00610	5.53448	5.24598	5.79745	0.880369	1.18876	0.757458	0.199943	0.000304284	0.0016014	0.00211781	0.00540094	pyrI; aspartate carbamoyltransferase regulatory subunit
312	K00611	5.1872	4.91651	5.925	1.05284	0.917817	1.03597	0.16024	2.11e-05	0.000827224	0.000296896	0.00292171	OTC, argF, argI; ornithine carbamoyltransferase [EC:2.1.3.3]
313	K00612	-6.51051	-7.69597	-5.45599	1.10272	6.18965	0.16742	0.407714	0.385417	0.44423	0.389214	0.462095	E2.1.3.-; carbamoyltransferase [EC:2.1.3.-]
314	K00613	-2.92142	-3.13568	-2.72126	0.738544	4.61351	0.135504	0.372179	0.0754276	0.108555	0.202838	0.269066	GATM; glycine amidinotransferase [EC:2.1.4.1]
315	K00615	7.37105	6.8697	7.70027	0.999425	1.00404	0.926704	0.191714	9.67e-05	0.000921424	0.00105437	0.00367232	E2.2.1.1, tktA, tktB; transketolase [EC:2.2.1.1]
316	K00616	5.77333	5.4141	6.09925	0.866058	0.998703	0.833672	0.194	0.000271827	0.00149614	0.00175866	0.00476464	E2.2.1.2, talA, talB; transaldolase [EC:2.2.1.2]
317	K00619	-2.06175	-3.30863	-1.15946	2.75771	5.43931	0.434685	0.272857	0.0359012	0.0562194	0.0186173	0.0336147	argA; amino-acid N-acetyltransferase [EC:2.3.1.1]
318	K00620	5.10614	4.72877	5.86114	1.16622	1.19629	0.975266	0.165096	2.5e-05	0.000827224	0.000348694	0.00309223	argJ; glutamate N-acetyltransferase / amino-acid N-acetyltransferase [EC:2.3.1.35 2.3.1.1]
319	K00625	5.64315	5.21078	6.00107	1.02198	1.12922	0.863934	0.147386	8.6e-05	0.000883639	0.000208836	0.00258367	E2.3.1.8, pta; phosphate acetyltransferase [EC:2.3.1.8]
320	K00626	4.41345	3.89563	4.87728	0.932322	0.943163	0.84613	0.209429	0.00146112	0.00470458	0.00313294	0.00723855	E2.3.1.9, atoB; acetyl-CoA C-acetyltransferase [EC:2.3.1.9]
321	K00627	1.34876	1.6018	1.22745	-0.191287	1.25737	-0.13135	0.426571	0.460452	0.536753	0.446139	0.52882	DLAT, aceF, pdhC; pyruvate dehydrogenase E2 component (dihydrolipoamide acetyltransferase) [EC:2.3.1.12]
322	K00631	-1.28154	-0.363172	-2.92257	-3.08164	2.90342	-0.966061	0.127963	0.00399094	0.00826841	7.31e-05	0.00188265	plsB; glycerol-3-phosphate O-acyltransferase [EC:2.3.1.15]
323	K00632	0.263136	0.697131	-0.31863	-1.14653	1.66413	-0.609813	0.186571	0.15545	0.202219	0.00157018	0.00454433	fadA, fadI; acetyl-CoA acyltransferase [EC:2.3.1.16]
324	K00633	3.42664	2.94042	3.67864	0.739614	0.899266	0.783055	0.192516	0.000509092	0.00221508	0.0015508	0.00443754	lacA; galactoside O-acetyltransferase [EC:2.3.1.18]
325	K00634	3.85862	3.42119	4.45876	0.887617	1.69735	0.439134	0.260571	0.00932108	0.0186747	0.0160206	0.0294765	ptb; phosphate butyryltransferase [EC:2.3.1.19]
326	K00638	-2.5633	-1.6072	-3.71751	-2.30202	4.57776	-0.439923	0.255641	0.0715222	0.104527	0.0131859	0.0247296	catB; chloramphenicol O-acetyltransferase type B [EC:2.3.1.28]
327	K00639	4.43973	4.09622	4.80658	0.594145	1.09906	0.518298	0.267067	0.015652	0.0286265	0.021401	0.0381273	kbl, GCAT; glycine C-acetyltransferase [EC:2.3.1.29]
328	K00640	6.00403	5.64258	6.57055	1.02396	1.15197	0.838999	0.173429	0.000200434	0.00126269	0.000706484	0.00348293	cysE; serine O-acetyltransferase [EC:2.3.1.30]
329	K00641	-1.67207	-3.86766	1.20962	3.7997	5.36316	0.667278	0.201942	0.00192513	0.00548607	0.00234832	0.00582418	metX; homoserine O-acetyltransferase/O-succinyltransferase [EC:2.3.1.31 2.3.1.46]
330	K00645	5.88075	5.35913	6.23576	1.02969	1.0728	0.872162	0.187089	0.000183566	0.0012106	0.00115032	0.00379623	fabD; [acyl-carrier-protein] S-malonyltransferase [EC:2.3.1.39]
331	K00647	3.85919	3.66452	3.95398	0.706906	2.00296	0.326045	0.367895	0.0605663	0.0926368	0.193964	0.261191	fabB; 3-oxoacyl-[acyl-carrier-protein] synthase I [EC:2.3.1.41]
332	K00648	6.03932	5.6566	6.37556	0.841029	1.08665	0.74301	0.183429	0.000516216	0.00223594	0.000914047	0.00359623	fabH; 3-oxoacyl-[acyl-carrier-protein] synthase III [EC:2.3.1.180]
333	K00651	5.9489	5.43178	6.3037	1.12165	1.06909	0.947549	0.179092	4.12e-05	0.000827224	0.000737274	0.00348316	metA; homoserine O-succinyltransferase/O-acetyltransferase [EC:2.3.1.46 2.3.1.31]
334	K00652	4.93608	4.56842	5.31108	0.584102	1.61339	0.360819	0.343616	0.0705502	0.10587	0.0994005	0.146291	bioF; 8-amino-7-oxononanoate synthase [EC:2.3.1.47]
335	K00655	6.40897	5.89199	6.81679	1.03829	1.11543	0.852957	0.190857	0.000168806	0.00115786	0.00131354	0.00402476	plsC; 1-acyl-sn-glycerol-3-phosphate acyltransferase [EC:2.3.1.51]
336	K00656	7.09166	6.54829	7.28585	1.01096	1.01557	0.873576	0.208286	0.000377775	0.00182869	0.00286875	0.00675128	E2.3.1.54, pflD; formate C-acetyltransferase [EC:2.3.1.54]
337	K00657	4.18028	3.69894	4.55524	0.705999	1.02317	0.679978	0.221429	0.0020562	0.00601299	0.00544276	0.0114783	speG, SAT; diamine N-acetyltransferase [EC:2.3.1.57]
338	K00658	2.44232	2.7455	2.15088	-0.16037	1.43752	-0.105958	0.458857	0.966566	0.974261	0.712299	0.773045	DLST, sucB; 2-oxoglutarate dehydrogenase E2 component (dihydrolipoamide succinyltransferase) [EC:2.3.1.61]
339	K00661	6.38739	6.03851	6.67413	0.806063	1.10464	0.712625	0.217938	0.000404952	0.00190789	0.0031143	0.00720309	maa; maltose O-acetyltransferase [EC:2.3.1.79]
340	K00662	0.409806	-0.0908956	1.04597	0.857603	2.26079	0.348424	0.334	0.0666004	0.10061	0.11113	0.160998	aacC; aminoglycoside 3-N-acetyltransferase [EC:2.3.1.81]
341	K00666	3.76195	3.58729	4.24519	0.597051	1.30946	0.429765	0.312857	0.0292797	0.0488872	0.055431	0.0880788	K00666; fatty-acyl-CoA synthase [EC:6.2.1.-]
342	K00673	-2.06614	-0.620393	-4.51106	-3.77187	4.66655	-0.734167	0.197429	0.00782325	0.0156544	0.00132208	0.00415008	astA; arginine N-succinyltransferase [EC:2.3.1.109]
343	K00674	3.6576	3.24388	4.04179	0.788583	0.973018	0.802598	0.186233	0.000603739	0.00249273	0.00135514	0.00409658	dapD; 2,3,4,5-tetrahydropyridine-2,6-dicarboxylate N-succinyltransferase [EC:2.3.1.117]
344	K00675	-0.200965	0.384348	-2.15988	-2.81437	2.37524	-1.18519	0.0928572	9.14e-05	0.000973111	7.61e-06	0.0018416	nhoA; N-hydroxyarylamine O-acetyltransferase [EC:2.3.1.118]
345	K00677	5.10845	4.83001	5.45005	0.760843	1.24526	0.549572	0.245644	0.00281456	0.0075239	0.00922582	0.0180956	lpxA; UDP-N-acetylglucosamine acyltransferase [EC:2.3.1.129]
346	K00680	3.46225	3.40745	3.78432	0.480353	1.92571	0.253277	0.359612	0.21366	0.277837	0.155082	0.215297	ytmI; uncharacterized N-acetyltransferase [EC:2.3.1.-]
347	K00681	1.64645	1.97121	0.49096	-1.04056	1.50471	-0.633943	0.247929	0.0241648	0.04134	0.0095893	0.0187135	ggt; gamma-glutamyltranspeptidase / glutathione hydrolase [EC:2.3.2.2 3.4.19.13]
348	K00684	3.18598	2.8778	3.58242	0.725794	1.67138	0.397008	0.321143	0.0139034	0.0259464	0.0644283	0.100432	aat; leucyl/phenylalanyl-tRNA---protein transferase [EC:2.3.2.6]
349	K00685	-6.38629	-9.33829	-2.59988	5.22208	7.70124	0.605923	0.304857	0.0328187	0.0509859	0.0629513	0.0963343	ATE1; arginyl-tRNA---protein transferase [EC:2.3.2.8]
350	K00686	-5.7085	-6.35351	-5.04663	1.61012	3.23286	0.471991	0.226571	0.00453455	0.0102473	0.0100015	0.0185131	tgl; protein-glutamine gamma-glutamyltransferase [EC:2.3.2.13]
351	K00687	-2.19455	-2.51245	-1.84157	0.61138	2.54143	0.211039	0.400457	0.510449	0.583182	0.356832	0.437964	pbp2B, penA; penicillin-binding protein 2B
[truncated: 5,009 more rows]
