# Supplementary material for: Gut microbiota in inflammatory bowel disease: a combined culturomics and metagenomics perspective
Source: Research Square preprint supplement (doi:10.21203/rs.3.rs-3343885/v1), 2023-09-18
Supplement: Supplementary file 5 [file fe801e0477628a9fb1a624c6.xlsx]

## Sheet: Additional file 6
IBD-enriched and depleted species in culturomics.
	UC-enriched or -depeleted species	Frequency			RFDs (cutoff = 0.4 or -0.4)		P value (Fisher's exact test )		Phylum	Family
		HC	UC	CD	UC-HC	CD-HC	UC vs. HC	CD vs. HC
enriched in UC	Enterococcus gallinarum	0.25	0.9	0.7	0.65	0.45	0.0128	0.1534	Firmicutes	Enterococcaceae
	Flavonifractor plautii	0.125	0.7	0.5	0.575	0.375	0.0248	0.1516	Firmicutes	Oscillospiraceae
	Bifidobacterium dentium	0.125	0.7	0.5	0.575	0.375	0.0248	0.1516	Actinobacteriota	Bifidobacteriaceae
	Peptoniphilus gorbachii	0	0.5	0.1	0.5	0.1	0.0359	>0.9999	Firmicutes	Peptoniphilaceae
depleted in UC	Mesosutterella multiformis	0.5	0	0	-0.5	-0.5	0.0229	0.0229	Proteobacteria	Sutterellaceae
	Campylobacter ureolyticus	0.625	0.1	0	-0.525	-0.625	0.043	0.0065	Proteobacteria	Campylobacteraceae
	Bifidobacterium longum subsp. suillum	0.625	0.1	0.1	-0.525	-0.525	0.043	0.043	Actinobacteriota	Bifidobacteriaceae
	Bifidobacterium pseudocatenulatum	1	0.4	0.3	-0.6	-0.7	0.0128	0.004	Actinobacteriota	Bifidobacteriaceae
	Bifidobacterium adolescentis	1	0.4	0.2	-0.6	-0.8	0.0128	0.0011	Actinobacteriota	Bifidobacteriaceae
	Collinsella aerofaciens	1	0.3	0.3	-0.7	-0.7	0.004	0.004	Actinobacteriota	Coriobacteriaceae
	Sutterella wadsworthensis	0.75	0	0.4	-0.75	-0.35	0.0015	0.188	Proteobacteria	Sutterellaceae
	Bifidobacterium catenulatum	1	0.2	0.2	-0.8	-0.8	0.0011	0.0011	Actinobacteriota	Bifidobacteriaceae
	CD-enriched or -depeleted species	Frequency			RFDs (cutoff = 0.4 or -0.4)		P value (Fisher's exact test )		Phylum	Family
		HC	UC	CD	UC-HC	CD-HC	UC vs. HC	CD vs. HC
enriched in CD	Clostridium ramosum	0.125	0.3	0.7	0.175	0.575	0.5882	0.0248	Firmicutes	Clostridiaceae
	Ruminococcus gnavus	0.125	0.2	0.7	0.075	0.575	>0.9999	0.0248	Firmicutes	Oscillospiraceae
	Clostridium clostridioforme	0.25	0.2	0.8	-0.05	0.55	>0.9999	0.0536	Firmicutes	Clostridiaceae
	Morganella morganii	0	0.4	0.5	0.4	0.5	0.0915	0.0359	Proteobacteria	Morganellaceae
	Clostridium symbiosum	0.125	0.4	0.6	0.275	0.475	0.3137	0.0656	Firmicutes	Clostridiaceae
	Enterococcus gallinarum	0.25	0.9	0.7	0.65	0.45	0.0128	0.1534	Firmicutes	Enterococcaceae
	Veillonella parvula	0.25	0.3	0.7	0.05	0.45	>0.9999	0.1534	Firmicutes	Veillonellaceae
	Enterococcus avium	0.375	0.7	0.8	0.325	0.425	0.3416	0.1448	Firmicutes	Enterococcaceae
depleted in CD	Citrobacter freundii	0.625	0.3	0.2	-0.325	-0.425	0.3416	0.1448	Proteobacteria	Enterobacteriaceae
	Streptococcus anginosus	0.625	0.5	0.2	-0.125	-0.425	0.6641	0.1448	Firmicutes	Streptococcaceae
	Parabacteroides distasonis	0.75	0.6	0.3	-0.15	-0.45	0.638	0.1534	Bacteroidota	Tannerellaceae
	Streptococcus salivarius	0.75	0.6	0.3	-0.15	-0.45	0.638	0.1534	Firmicutes	Streptococcaceae
	Bacteroides uniformis	0.875	0.6	0.4	-0.275	-0.475	0.3137	0.0656	Bacteroidota	Bacteroidaceae
	Bacteroides coprocola	0.5	0.1	0	-0.4	-0.5	0.1176	0.0229	Bacteroidota	Bacteroidaceae
	Latilactobacillus sakei	0.5	0.1	0	-0.4	-0.5	0.1176	0.0229	Firmicutes	Lactobacillaceae
	Mesosutterella multiformis	0.5	0	0	-0.5	-0.5	0.0229	0.0229	Proteobacteria	Sutterellaceae
	Bacillus cereus	0.625	0.4	0.1	-0.225	-0.525	0.6372	0.043	Firmicutes	Bacillaceae
	Bifidobacterium bifidum	0.625	0.5	0.1	-0.125	-0.525	0.6641	0.043	Actinobacteriota	Bifidobacteriaceae
	Bifidobacterium longum subsp. suillum	0.625	0.1	0.1	-0.525	-0.525	0.043	0.043	Actinobacteriota	Bifidobacteriaceae
	Alistipes shahii	0.625	0.3	0	-0.325	-0.625	0.3416	0.0065	Bacteroidota	Rikenellaceae
	Campylobacter ureolyticus	0.625	0.1	0	-0.525	-0.625	0.043	0.0065	Proteobacteria	Campylobacteraceae
	Parabacteroides merdae	0.875	0.5	0.2	-0.375	-0.675	0.1516	0.0152	Bacteroidota	Tannerellaceae
	Bifidobacterium pseudocatenulatum	1	0.4	0.3	-0.6	-0.7	0.0128	0.004	Actinobacteriota	Bifidobacteriaceae
	Collinsella aerofaciens	1	0.3	0.3	-0.7	-0.7	0.004	0.004	Actinobacteriota	Coriobacteriaceae
	Bifidobacterium adolescentis	1	0.4	0.2	-0.6	-0.8	0.0128	0.0011	Actinobacteriota	Bifidobacteriaceae
	Bifidobacterium catenulatum	1	0.2	0.2	-0.8	-0.8	0.0011	0.0011	Actinobacteriota	Bifidobacteriaceae
